# Supplementary material for: Worldwide Regulations of Standard Values of Pesticides for Human Health Risk Control: A Review
Source: Int J Environ Res Public Health. 2017 Jul 22;14(7):826. doi: 10.3390/ijerph14070826 (PMC5551264; doi:10.3390/ijerph14070826)
Supplement: Supplementary file 1 [file ijerph-14-00826-s001.zip › ijerph-14-00826-s001.xlsx]

## Sheet: Worldwide Soil RGVs
Country Name	Pesticide Name	CAS No.	Pesticide Soil RGV (mg/kg)	Reference
1. Principality of Andorra	p, p-DDD	72-54-8	0.7	Residential Guideline levels of alert
Principality of Andorra	p, p'-DDT	50-29-3	0.2	Residential Guideline levels of alert
Principality of Andorra	p, p'-DDE	72-55-9	0.6	Residential Guideline levels of alert
Principality of Andorra	Lindane (gamma-HCH)	58-89-9	0.01	Residential Guideline levels of alert
Principality of Andorra	Alpha hexaclorocicloexà	319-84-6	0.01	Residential Guideline levels of alert
Principality of Andorra	Beta-hexachlorocyclohexane	319-85-7	0.01	Residential Guideline levels of alert
Principality of Andorra	Chlordane	12789-03-6	0.01	Residential Guideline levels of alert
Principality of Andorra	Carbaryl	63-25-2	0.045	Residential Guideline levels of alert
Principality of Andorra	Carbofurà	1563-66-2	0.0017	Residential Guideline levels of alert
Principality of Andorra	Endosulfan	115-29-7	0.6	Residential Guideline levels of alert
Principality of Andorra	"Drin" Total		0.14	Residential Guideline levels of alert
Principality of Andorra	Aldrin	309-00-2	0.14	Residential Guideline levels of alert
Principality of Andorra	dieldrin	60-57-1	0.14	Residential Guideline levels of alert
Principality of Andorra	endrin	72-20-8	0.14	Residential Guideline levels of alert
3. Republic of Armenia	(Chloride-N,N-methyl-N) -(2 -kloretil)hidrazin	unknown	0.1	Table 2 RGV
Republic of Armenia	[1 -(4-nitrofenil)-2-1.3-propandiolAmin)]nitrate	unknown	0.02	Table 2 RGV
Republic of Armenia	0 -(2,4-diklorfenil)-S-Propyl -0 -etiltiofosfat	unknown	0.1	Table 2 RGV
Republic of Armenia	0-ethyl -0 -fenil-S-propiltiofosfat	unknown	0.05	Table 2 RGV
Republic of Armenia	1,1-di-(4-klorfenil-2.2.2-trikloretan)	unknown	0.1	Table 2 RGV
Republic of Armenia	2kloretilfosfonayinacidsaltbenzimidazolayin	unknown	0.5	Table 2 RGV
Republic of Armenia	2 M -4 KK (2 methyl 4 klorfenoksi) karagattu (assumed to be MCPA 2-methyl-4-chlorophenol)	94-74-6	0.6	Table 1 RGV
Republic of Armenia	2,4-Daceticaciddiklorfenoksi	94-75-7	0.1	Table 1 RGV
Republic of Armenia	2,4-Dbutylethergroup	1320-18-9	0.15	Table 1 RGV
Republic of Armenia	2,4-Ddiklorfenol	120-83-2	0.05	Table 1 RGV
Republic of Armenia	2,4-Dlowvolatileesters group	25168-26-7	0.15	Table 1 RGV
Republic of Armenia	2,4-DTVGroupkratilayin	unknown	0.15	Table 1 RGV
Republic of Armenia	2,4-DTVGroupOktilayin	unknown	0.15	Table 1 RGV
Republic of Armenia	2,4-D-Aminsalt0to	2008-39-1	25	Table 1 RGV
Republic of Armenia	2.3.6-ТБА(assumedtobe2,4,6-TBA)	607-99-8	0.15	Table 2 RGV
Republic of Armenia	2.4-Дacid(assumedtobe2,4-Dacid)	94-75-7	0.1	Table 2 RGV
Republic of Armenia	2.4-Дallowstsndoghakaneterner	unknown	0.15	Table 2 RGV
Republic of Armenia	2.4-Дbutilayineter(assumedtobe2,4-Dbutylester)	94-80-4	0.15	Table 2 RGV
Republic of Armenia	2.4-Дoktilayineter	unknown	0.15	Table 2 RGV
Republic of Armenia	2-2.5-dihidrofuranoksa	unknown	0.4	Table 2 RGV
Republic of Armenia	2-methyl-4-դիմեթիլամինամեթիլբենզիմիդազոլ-5 vol dihidroklorid	unknown	0.03	Table 2 RGV
Republic of Armenia	4.4 diklordifenil -3 chlorine - metilmetan (DDT) and its derivatives	50-29-3	0.1	Table 1 RGV
Republic of Armenia	5-ethyl-5 hidroksimetil -2 - (furil -2)-1.3-dioksan	unknown	0.2	Table 2 RGV
Republic of Armenia	6-methyl-2-tiauratsilisodiumsalt	unknown	0.1	Table 2 RGV
Republic of Armenia	Agelon	39464-88-5	0.01	Table 1 RGV
Republic of Armenia	Akreks	Unknown	1	Table 1 RGV
Republic of Armenia	Aktellik	29232-93-7	0.1	Table 1 RGV
Republic of Armenia	Akvo-N-oxy-2 metilpiridin manganese (II) chloride	unknown	0.02	Table 2 RGV
Republic of Armenia	Alfametilstirol	unknown	0.5	Table 1 RGV
Republic of Armenia	Aluminumfosetil(assumedtobefostyl-aluminium)	39148-24-8	0.5	Table 2 RGV
Republic of Armenia	Amidosulfuron	120923-37-7	0.25	Table 2 RGV
Republic of Armenia	Amitraz	33089-671-1	0.2	Table 2 RGV
Republic of Armenia	Ammoniumglyufosinat(AssumedtobeAmmoniumGlufosinate)	771822-82-2	0.1	Table 2 RGV
Republic of Armenia	Atrazin(assumedtobeAtrizine)	1912-24-9	0.01	Table 1 RGV
Republic of Armenia	Atsetaklor(assumedtobeAcetochlor)	34256-82-1	0.5	Table 2 RGV
Republic of Armenia	Atsifluorfen(assumedtobeAcifluorfen)	50594-66-6	0.2	Table 2 RGV
Republic of Armenia	Aziprotrin(hungarianforAziprotryne)	4658-28-0	0.1	Table 2 RGV
Republic of Armenia	Banvel D	1981-00-9	0.25	Table 1 RGV
Republic of Armenia	Bayfidan	55219-65-3	0.02	Table 1 RGV
Republic of Armenia	Bayleton + metabolit	43121-43-3	0.03	Table 1 RGV
Republic of Armenia	Bazudin	333-41-5	0.1	Table 1 RGV
Republic of Armenia	Benomil	17804-35-2	0.1	Table 2 RGV
Republic of Armenia	Bensulfuronmetil(assumedtobeBensulfuronmethyl)	83055-99-6	0.02	Table 2 RGV
Republic of Armenia	Bensultan	unknown	0.06	Table 2 RGV
Republic of Armenia	Bentazon	25057-89-0	0.15	Table 2 RGV
Republic of Armenia	Bezoilmrjnattvisodiumsalt	unknown	0.5	Table 2 RGV
Republic of Armenia	Bifentrin	82657-04-3	0.1	Table 2 RGV
Republic of Armenia	Bioresmetrin	28434-01-7	0.05	Table 2 RGV
Republic of Armenia	Brom4trifenilfosfonayinmetilbenzaldehid	unknown	0.25	Table 2 RGV
Republic of Armenia	Bromafos(assumedtobeBromofos)	2104-96-3	0.2	Table 2 RGV
Republic of Armenia	Bromoksinil (assumed to be Bromoxynil)	25671-46-9	0.1	Table 2 RGV
Republic of Armenia	Brompropilat(assumedtobebromoprophylate)	18181-80-1	0.05	Table 2 RGV
Republic of Armenia	Bromukonazol	116255-48-2	0.1	Table 2 RGV
Republic of Armenia	Bronapol(assumedtobeBronopol)	52-51-7	0.5	Table 2 RGV
Republic of Armenia	Butilat(assumedtobeButylate)	2008-41-5	0.6	Table 2 RGV
Republic of Armenia	Delapon(Dalapon)	75-99-0	0.5	Table 1 RGV
Republic of Armenia	Deltametrin(AssumedtobeDeltamethrin)	52918-63-5	0.01	Table 2 RGV
Republic of Armenia	Desmedifam	13684-56-5	0.25	Table 2 RGV
Republic of Armenia	Desmetrin(assumedtobedesmetryn)	1014-69-3	0.1	Table 2 RGV
Republic of Armenia	Detsis	unknown	0.01	Table 1 RGV
Republic of Armenia	Diafentiuron(assumedtobeDiafenthiuron)	80060-09-9	0.2	Table 2 RGV
Republic of Armenia	Diazinon	333-41-5	0.1	Table 2 RGV
Republic of Armenia	Difenamid(assumedtobeDiphenamid)	957-51-7	0.25	Table 2 RGV
Republic of Armenia	Difenokonazol(assumedtobeDifenoconazole)	119446-68-2	0.1	Table 2 RGV
Republic of Armenia	Diflyufenikan(assumedtobeDiflufenican)	83164-333-4	0.05	Table 2 RGV
Republic of Armenia	Dikamba(AssumedtobeDicamba)	1918-00-9	0.25	Table 2 RGV
Republic of Armenia	Diklorfluanid(assumedtobeDichlofluanid)	1085-98-9	0.2	Table 2 RGV
Republic of Armenia	Diklorfos(assumedtobeDichlorvos)	62-73-7	0.03	Table 2 RGV
Republic of Armenia	Diklorpropdiklorprop-П(assumedtobeDichloroprop)	120-36-5	0.1	Table 2 RGV
Republic of Armenia	Dikofol(assumedtobeDicoflo)	115-32-2	1	Table 2 RGV
Republic of Armenia	Dikvat(poortranslationofDiquat)	85-00-7	0.2	Table 2 RGV
Republic of Armenia	Dilor	14168-01-5	0.5	Table 1 RGV
Republic of Armenia	Dimetenamid(assumedtobeDimethenamid)	87674-68-8	0.1	Table 2 RGV
Republic of Armenia	Dimetoat(assumedtobeDimethoate)	60-51-5	0.1	Table 2 RGV
Republic of Armenia	Dimetomorf(assumedtobeDimethomorph)	110488-70-5	0.04	Table 2 RGV
Republic of Armenia	Dinobuton	973-21-7	1	Table 2 RGV
Republic of Armenia	Dinokap(assumedtobeDinocap)	39300-45-3	0.02	Table 2 RGV
Republic of Armenia	Dipropetrin(poortranspationofdipropetryn)	4147-51-7	0.3	Table 2 RGV
Republic of Armenia	Ditalimfos	5131-24-8	0.15	Table 2 RGV
Republic of Armenia	Ditianon(assumedtobeDithianon)	3347-22-6	0.02	Table 2 RGV
Republic of Armenia	Diuron	330-54-1	0.5	Table 1 RGV
Republic of Armenia	Duroban	unknown	0.2	Table 1 RGV
Republic of Armenia	Endosulfan	115-29-7	0.1	Table 2 RGV
Republic of Armenia	Entam	Unknown	0.9	Table 1 RGV
Republic of Armenia	Epibrassinolid(assumedtobeEpibrassinolide)	78821-43-9	0.5	Table 2 RGV
Republic of Armenia	Esfenvalerat	66230-04-4	0.1	Table 2 RGV
Republic of Armenia	Etefon	16672-87-0	0.5	Table 2 RGV
Republic of Armenia	Etirimol(assumedtobeEthirimol)	23947-60-6	0.15	Table 2 RGV
Republic of Armenia	Etofumezat(assumedtobeEthofumesate)	26225-79-6	0.2	Table 2 RGV
Republic of Armenia	Fenarimol	60168-88-9	0.002	Table 2 RGV
Republic of Armenia	Fenazakhin(assumedtobeFenazaquin)	120928-09-9	0.2	Table 2 RGV
Republic of Armenia	Fenitrotion	122-14-5	1	Table 2 RGV
Republic of Armenia	Fenmedifarm	unknown	0.25	Table 2 RGV
Republic of Armenia	Fenoksapropetil	unknown	0.04	Table 2 RGV
Republic of Armenia	Fenoksikarb(assumedtobeFenoxycarb)	72490-01-8	0.03	Table 2 RGV
Republic of Armenia	Fenoksipropionattviderivatives	unknown	0.02	Table 2 RGV
Republic of Armenia	Fenpiklonil	74738-17-3	0.05	Table 2 RGV
Republic of Armenia	Fenpiroksimat(assumedtobeFenpyroximate)	134098-58-9	0.3	Table 2 RGV
Republic of Armenia	Fenpropatrin	39515-41-8	0.05	Table 2 RGV
Republic of Armenia	Fenpropidin	67306-00-7	0.4	Table 2 RGV
Republic of Armenia	Fenpropimorf	67306-03-0	0.5	Table 2 RGV
Republic of Armenia	Fention	55-38-9	0.1	Table 2 RGV
Republic of Armenia	Fentoat	2597-03-7	0.4	Table 2 RGV
Republic of Armenia	Fenuron	101-42-8	1.8	Table 1 RGV
Republic of Armenia	Fenvaleriat(assumedtobeFenvalerate)	51630-58-1	0.02	Table 2 RGV
Republic of Armenia	Fipronil	120068-37-3	0.05	Table 2 RGV
Republic of Armenia	Fluazifopbutil(assumedtobeFluazifopbutyl)	69806-50-4	0.3	Table 2 RGV
Republic of Armenia	Fludioksonil(assumedtobeFludioxonil)	13141-86-1	0.2	Table 2 RGV
Republic of Armenia	Fluokloridion(assumedtobeFlurochloridone)	61213-25-0	0.03	Table 2 RGV
Republic of Armenia	Fluometuron	2164-17-2	0.03	Table 2 RGV
Republic of Armenia	Fluooksipir(assumedtobeFluroxypyr)	69377-81-7	0.2	Table 2 RGV
Republic of Armenia	Flutriafol	76674-21-0	0.1	Table 2 RGV
Republic of Armenia	Flyuvalinat(assumedtobeFluvalinate)	69409-94-5	0.01	Table 2 RGV
Republic of Armenia	Foksim	14816-18-3	1	Table 2 RGV
Republic of Armenia	Folpet	133-07-3	0.1	Table 2 RGV
Republic of Armenia	Formaldehyde	50-00-0	7	Table 1 RGV
Republic of Armenia	Formation	unknown	0.2	Table 2 RGV
Republic of Armenia	Fosfamid	60-51-5	0.3	Table 1 RGV
Republic of Armenia	Fosmet	732-11-6	0.1	Table 2 RGV
Republic of Armenia	Fozalon	54182-71-7	0.5	Table 1 RGV
Republic of Armenia	Ftalafos	unknown	0.1	Table 1 RGV
Republic of Armenia	Ftorglikofen	unknown	0.03	Table 2 RGV
Republic of Armenia	Furadan	1563-66-2	0.01	Table 1 RGV
Republic of Armenia	Furatiokarb(assumedtobeFuratiocarb)	65907-30-4	0.01	Table 2 RGV
Republic of Armenia	Furfurol	98-01-1	3	Table 1 RGV
Republic of Armenia	Galaksifopetoksietil	unknown	0.15	Table 2 RGV
Republic of Armenia	Galaksifop-methyl	unknown	0.15	Table 2 RGV
Republic of Armenia	Gamma-HKTSHheksaklortsikloheksan(Linda)	58-89-9	0.1	Table 1 RGV
Republic of Armenia	Gardona	22350-76-1	1.4	Table 1 RGV
Republic of Armenia	Glifosat(assumedtobeGlyphosat)	1071-83-6	0.5	Table 2 RGV
Republic of Armenia	Glifosattrimezium(assumedtobeGlyphosate-trimesium)	81591-81-3	0.8	Table 2 RGV
Republic of Armenia	Guazatin(assumedtobeGuazatine)	19010-48-1	0.1	Table 2 RGV
Republic of Armenia	Heksaflumuron(assumedtobeHexaflumuron)	86479-06-3	0.08	Table 2 RGV
Republic of Armenia	Heksaklortsikloheksan(α,β,γizomerner)(assumedtobelindane)	58-98-9	0.1	Table 2 RGV
Republic of Armenia	Heksitiazoks	78587-05-0	0.1	Table 2 RGV
Republic of Armenia	Heterofos	40626-35-5	0.05	Table 1 RGV
Republic of Armenia	Hetpaklor(AssumedtobeHeptachlor)	76-44-8	0.05	Table 2 RGV
Republic of Armenia	HKBD(heksaklorbutadien)(assumedtobeHCBDHexachlorobutadiene)	87-68-3	0.5	Table 1 RGV
Republic of Armenia	Imazakvin(assumedtobeImazaquin)	81335-37-7	0.3	Table 2 RGV
Republic of Armenia	Imazametabenz(assumedtobeImazamethavbenz-methyl)	81405-85-8	0.3	Table 2 RGV
Republic of Armenia	Imazapir(assumedtobeImazapyr)	81334-34-1	0.5	Table 2 RGV
Republic of Armenia	Imazetapir(assumedtobeImazethapyr)	81335-77-5	0.1	Table 2 RGV
Republic of Armenia	Ioksinil(assumedtobeIoxynil)	1689-83-4	0.2	Table 2 RGV
Republic of Armenia	Iprobenfos	26087-47-8	0.03	Table 2 RGV
Republic of Armenia	Iprodion(assumedtobeIprodione)	36734-19-7	0.15	Table 2 RGV
Republic of Armenia	Isazofos	42509-80-8	0.03	Table 2 RGV
Republic of Armenia	Izatrin	unknown	0.05	Table 1 RGV
Republic of Armenia	Izopropilbenzol(assumedtobeIsopropylbenzene)	98-82-8	0.5	Table 1 RGV
Republic of Armenia	Izopropilbenzolandalfametilstirol	unknown	0.5	Table 1 RGV
Republic of Armenia	Izoproturon	34123-59-6	0.05	Table 2 RGV
Republic of Armenia	Karbaminayinttvi etilenbisditio - tsinkakan salt	unknown	0.6	Table 2 RGV
Republic of Armenia	Karbendazim	10605-21-7	0.1	Table 2 RGV
Republic of Armenia	Karbofos	121-75-5	2	Table 1 RGV
Republic of Armenia	Karbofuran(AssumedtobeCarbofuran)	1563-66-2	0.01	Table 2 RGV
Republic of Armenia	Karboksin	5234-68-4	0.05	Table 2 RGV
Republic of Armenia	Karboril(assumedtobekarbaril)	63-25-2	0.05	Table 2 RGV
Republic of Armenia	Karbosulfan(assumedtobeCarbosulfan)	55285-14-8	0.01	Table 2 RGV
Republic of Armenia	Kheptenafos(assumedtobeHeptenophos)	23560-59-0	0.2	Table 2 RGV
Republic of Armenia	Khizalofopetil	unknown	0.8	Table 2 RGV
Republic of Armenia	Kletodim	99129-21-2	0.1	Table 2 RGV
Republic of Armenia	Klofentezin	74115-24-5	0.07	Table 2 RGV
Republic of Armenia	Klopiralid(assumedtobeClopiralide)	1702-17-6	0.1	Table 2 RGV
Republic of Armenia	Kloramben(assumedtobeChloramben)	133-90-4	0.5	Table 2 RGV
Republic of Armenia	Kloramp	37223-72-6	0.05	Table 1 RGV
Republic of Armenia	Klorbromuron(assumedtobeChlorbromuron)	13360-45-7	0.05	Table 2 RGV
Republic of Armenia	Klorfluazuron(assumedtobeChlorfluazuron)	71422-67-8	0.3	Table 2 RGV
Republic of Armenia	Kloridazon(assumedtobeChloridazon)	1698-60-8	0.7	Table 2 RGV
Republic of Armenia	Klorofos	52-68-6	0.5	Table 1 RGV
Republic of Armenia	Kloroksuron	unknown	0.4	Table 2 RGV
Republic of Armenia	Klorotalonil(assumedtobeChlorothalonil)	1897-45-6	0.2	Table 2 RGV
Republic of Armenia	Klorpirifos(assumedtobeClorpirifos)	2921-88-2	0.2	Table 2 RGV
Republic of Armenia	Klorsulfoksim(assumedtobeChlorsulfoksim)	unknown	0.02	Table 2 RGV
Republic of Armenia	Klorsulfoksim-methyl	unknown	0.1	Table 2 RGV
Republic of Armenia	Klortaldimetil(assumedtobeChlorthal-dimethyl)	1861-32-1	0.1	Table 2 RGV
Republic of Armenia	Klortoluron(assumedtobechlorotoluron)	15545-48-9	0.06	Table 2 RGV
Republic of Armenia	Ksilolner(orto-,meta-,Settings.)	unknown	0.3	Table 1 RGV
Republic of Armenia	Kuprotsin	8066-21-5	1	Table 1 RGV
Republic of Armenia	Kvinklorak	unknown	0.2	Table 2 RGV
Republic of Armenia	Lenatsil	unknown	1	Table 2 RGV
Republic of Armenia	Linuron	330-55-2	1	Table 1 RGV
Republic of Armenia	Lyamdatsihalotrin(assumedtobeLambda-cyhalothrin)	91465-08-6	0.05	Table 2 RGV
Republic of Armenia	Malation	121-75-5	2	Table 2 RGV
Republic of Armenia	Mankotseb(assumedtobeMancozeb)	8018-01-7	0.1	Table 2 RGV
Republic of Armenia	Manx	unknown	1	Table 1 RGV
Republic of Armenia	Mekaprop(assumedtobeMecoprop)	7085-19-0	0.4	Table 2 RGV
Republic of Armenia	Metafos	63653-66-7	0.1	Table 1 RGV
Republic of Armenia	Metalaksil(assumedtobeMetalaxyl)	57837-19-1	0.05	Table 2 RGV
Republic of Armenia	Metamitron	41394-05-2	0.4	Table 2 RGV
Republic of Armenia	Metation	94650-98-3	1	Table 1 RGV
Republic of Armenia	Metazaklor(assumedtobemetzachlor)	67129-08-2	0.1	Table 2 RGV
Republic of Armenia	Metazin	unknown	0.1	Table 2 RGV
Republic of Armenia	Metolaklor (assumed to be Metolchlor)	51218-45-2	0.02	Table 2 RGV
Republic of Armenia	Metribuzin	21087-64-9	0.2	Table 2 RGV
Republic of Armenia	Mezoranil	4658-28-0	0.1	Table 1 RGV
Republic of Armenia	Miral	42509-80-8	0.03	Table 1 RGV
Republic of Armenia	Molinat	2212-67-1	0.9	Table 2 RGV
Republic of Armenia	Monolinuron	1746-81-2	0.7	Table 2 RGV
Republic of Armenia	Monuron	150-68-5	0.3	Table 1 RGV
Republic of Armenia	MSPA(assumedtobeMCPA)	94-74-6	0.04	Table 2 RGV
Republic of Armenia	MSRV(assumedtobeMCPB)	94-81-5	0.6	Table 2 RGV
Republic of Armenia	N-(4 - klorfenil)-4.6-dimetil-3 karboksipiridin 2-John	unknown	0.02	Table 2 RGV
Republic of Armenia	N, N-di - (β - oksietil) morfolinayin chloride	unknown	0.15	Table 2 RGV
Republic of Armenia	Nore(assumedtobeNorea)	18350-56-8	0.7	Table 2 RGV
Republic of Armenia	N-oxide-2.6-lutidin(Assumedtobe2,6-Lutidine-N-oxide)	1073-28-0	0.1	Table 2 RGV
Republic of Armenia	Oksadiksil(poorpolishtranslationofOxadixyl)	77732-09-3	0.4	Table 2 RGV
Republic of Armenia	Oksifluorfen(assumedtobeOxyfluorfen)	42874-03-3	0.2	Table 2 RGV
Republic of Armenia	Parationmetil(assumedtobeParathion-methyl)	298-00-0	0.1	Table 2 RGV
Republic of Armenia	Pebulat	1114-71-2	0.6	Table 2 RGV
Republic of Armenia	Pendimetalin	40487-42-1	0.15	Table 2 RGV
Republic of Armenia	Penkonazol(assumedtobePenconazole)	66246-88-6	0.1	Table 2 RGV
Republic of Armenia	Pentanaklor	unknown	0.6	Table 2 RGV
Republic of Armenia	Permetrin	52645-53-1	0.05	Table 2 RGV
Republic of Armenia	Phosphine	7803-51-2	0.4	Table 2 RGV
Republic of Armenia	Pikloram(assumedtobePicloram)	1918-02-1	0.05	Table 2 RGV
Republic of Armenia	Pirazosulfuronetil(assumedtobePyrazosulfuron-ethyl)	93697-74-6	0.2	Table 2 RGV
Republic of Armenia	Piridaben(assumedtobepyridaben)	96489-71-3	0.3	Table 2 RGV
Republic of Armenia	Piridafention	119-12-0	0.05	Table 2 RGV
Republic of Armenia	Piridat(assumedtobePyridat)	55512-33-9	0.03	Table 2 RGV
Republic of Armenia	Pirimifosmetil	29232-93-7	0.5	Table 2 RGV
Republic of Armenia	Pirimikarb	23103-98-2	0.3	Table 2 RGV
Republic of Armenia	Pirimisulfuron(assumedtobePrimisulfuron)	113036-87-6	0.1	Table 2 RGV
Republic of Armenia	Pirimor	23103-98-2	0.3	Table 1 RGV
Republic of Armenia	Poliklorkamfen	unknown	0.5	Table 1 RGV
Republic of Armenia	Poliklorpinen	unknown	0.5	Table 1 RGV
Republic of Armenia	Politriazin(asumedtobepolyatrazine)	72172-70-4	0.01	Table 1 RGV
Republic of Armenia	Profenfos(assumedtobeProfonofos)	41198-08-7	0.1	Table 2 RGV
Republic of Armenia	Prokloraz(assumedtobeProchloraz)	67747-09-5	0.3	Table 2 RGV
Republic of Armenia	Prometrin	7287-19-6	0.5	Table 1 RGV
Republic of Armenia	Prometrin	7287-19-6	0.5	Table 2 RGV
Republic of Armenia	Propakhizafop(assumedtobePropaquizafop)	111479-05-1	0.15	Table 2 RGV
Republic of Armenia	Propaklor(assumedtobepropachlor)1918-16-7	1918-16-7	0.2	Table 2 RGV
Republic of Armenia	Propanid	709-98-8	1.5	Table 1 RGV
Republic of Armenia	Propanil	96-76-1	1.5	Table 2 RGV
Republic of Armenia	Propargit	2312-35-8	0.4	Table 2 RGV
Republic of Armenia	Propazin(assumedtobepropazine)	139-40-2	0.05	Table 2 RGV
Republic of Armenia	Propetamfos	31218-83-4	0.02	Table 2 RGV
Republic of Armenia	Propikonazol	60207-90-1	0.2	Table 2 RGV
Republic of Armenia	Propizamid	23950-58-5	0.2	Table 2 RGV
Republic of Armenia	Ridsmil	unknown	0.05	Table 1 RGV
Republic of Armenia	Rimsulfuron	122931-48-0	0.03	Table 2 RGV
Republic of Armenia	Rinkord	unknown	0.02	Table 1 RGV
Republic of Armenia	Ronit	1134-23-2	0.8	Table 1 RGV
Republic of Armenia	Semeron	1014-69-3	0.1	Table 1 RGV
Republic of Armenia	Setoksidim(assumedtobesethoxydim)	74051-80-2	0.2	Table 2 RGV
Republic of Armenia	Sevin	62-25-2	0.05	Table 1 RGV
Republic of Armenia	Simazin	122-34-9	0.01	Table 1 RGV
Republic of Armenia	Sodiumtrikloratsetat(assumedtobeSodiumTrichloroacetate)	650-51-1	0.2	Table 2 RGV
Republic of Armenia	Stirol	unknown	0.1	Table 1 RGV
Republic of Armenia	Sulfometuronmetilipotassicsalt(assumedtobeSulfometuronMethyl)	74222-97-2	0.04	Table 2 RGV
Republic of Armenia	Sumitsidin	unknown	0.02	Table 1 RGV
Republic of Armenia	Superfosfat(P2O5)	unknown	200	Table 1 RGV
Republic of Armenia	Tebukonazol	107534-96-3	1	Table 2 RGV
Republic of Armenia	Temefos	3383-96-8	0.6	Table 2 RGV
Republic of Armenia	Terbatsil(assumedtobeterbacil)	5902-51-2	0.4	Table 2 RGV
Republic of Armenia	Terbufos	13071-79-9	0.05	Table 2 RGV
Republic of Armenia	Terbumeton	33693-04-8	0.2	Table 2 RGV
Republic of Armenia	Terbutilazin	5915-41-3	0.04	Table 2 RGV
Republic of Armenia	Terbutiuron(assumedtobeTebuthiuron)	34014-18-1	0.05	Table 2 RGV
Republic of Armenia	Terbutrin	886-50-0	0.3	Table 2 RGV
Republic of Armenia	Tetraklorvinoks(assumedtobeTetrachlorvinphos)	22248-79-9	1.4	Table 2 RGV
Republic of Armenia	Tiabendazol	148-79-8	1	Table 2 RGV
Republic of Armenia	Tiobikarb	unknown	0.5	Table 2 RGV
Republic of Armenia	Tiofanatmetil(assumedtobeTiofanatoMetil.)	23564-05-8	0.4	Table 2 RGV
Republic of Armenia	Tiotsiklam	unknown	0.07	Table 2 RGV
Republic of Armenia	Tiram	137-26-8	0.06	Table 2 RGV
Republic of Armenia	Triadimefon	43121-43-3	0.03	Table 2 RGV
Republic of Armenia	Triadimenol	55219-65-3	0.02	Table 2 RGV
Republic of Armenia	Triallat	2303-17-5	0.05	Table 2 RGV
Republic of Armenia	Trifluralin1	1582-09-8	0.1	Table 2 RGV
Republic of Armenia	Triforin	26644-46-2	0.03	Table 2 RGV
Republic of Armenia	Triklorfon(assumedtobeTricyhlorfon)	52-68-6	0.5	Table 2 RGV
Republic of Armenia	Trimorfamid	62046-65-5	0.4	Table 2 RGV
Republic of Armenia	Trisulfuron(assumedtobeTriasulfuron)	82097-50-5	0.1	Table 2 RGV
Republic of Armenia	Tsianafos(assumedtobeTaniaphos)	1003012-96-1	0.4	Table 2 RGV
Republic of Armenia	Tsiheksatin(assumedtobeCyhexatin)	13121-70-5	0.1	Table 2 RGV
Republic of Armenia	Tsikloat	unknown	0.8	Table 2 RGV
Republic of Armenia	Tsiklofos	unknown	0.03	Table 1 RGV
Republic of Armenia	Tsimoksanil(assumedtobeCymoxanil)	57966-95-7	0.04	Table 2 RGV
Republic of Armenia	Tsineb(assumedtobeZineb)	12122-67-7	0.2	Table 1 RGV
Republic of Armenia	Tsipermetrin(assumedtobeCypermetrin)	52315-07-8	0.02	Table 2 RGV
Republic of Armenia	Tsiprokonazol(assumedtobeCyproconazole)	94361-06-5	0.2	Table 2 RGV
Republic of Armenia	Tstsmbajratsin	unknown	0.4	Table 1 RGV
Republic of Armenia	YERTS	unknown	0.9	Table 2 RGV
Republic of Armenia	Yodfenfos(assumedtobeIsofenphos)	25311-71-1	0.5	Table 2 RGV
Republic of Armenia	Zenkor	21087-64-9	0.2	Table 1 RGV
Republic of Armenia	β - dihidro - heptaklor Assumed to be (β dihydro heptachlor)	14169-01-5	0.5	Table 2 RGV
4. Commonwealth of Australia	DDT+DDE+DDD		240	National 1999 Residential A
Commonwealth of Australia	DDT	50-29-3	240	National 1999 Residential A
Commonwealth of Australia	DDE	72-55-9	240	National 1999 Residential A
Commonwealth of Australia	DDD	72-54-8	240	National 1999 Residential A
Commonwealth of Australia	Aldrin and dieldrin		6	National 1999 Residential A
Commonwealth of Australia	Aldrin	309-00-2	6	National 1999 Residential A
Commonwealth of Australia	Dieldrin	60-57-1	6	National 1999 Residential A
Commonwealth of Australia	Chlordane	12789-03-6	50	National 1999 Residential A
Commonwealth of Australia	Endosulfan	115-29-7	270	National 1999 Residential A
Commonwealth of Australia	Endrin	72-20-8	10	National 1999 Residential A
Commonwealth of Australia	Heptachlor	76-44-8	6	National 1999 Residential A
Commonwealth of Australia	HCB(Hexachlorobenzene)	118-74-1	10	National 1999 Residential A
Commonwealth of Australia	Methoxychlor	72-43-5	300	National 1999 Residential A
Commonwealth of Australia	Mirex	2385-85-5	10	National 1999 Residential A
Commonwealth of Australia	Toxaphene	8001-35-2	20	National 1999 Residential A
Commonwealth of Australia	2,4,5-T	93-76-5	600	National 1999 Residential A
Commonwealth of Australia	2,4-D	94-75-7	900	National 1999 Residential A
Commonwealth of Australia	MCPA	94-74-6	600	National 1999 Residential A
Commonwealth of Australia	MCPB	94-81-5	600	National 1999 Residential A
Commonwealth of Australia	Mecoprop	93-65-2	600	National 1999 Residential A
Commonwealth of Australia	Picloram	1918--2-1	4500	National 1999 Residential A
Commonwealth of Australia	Atrazine	1912-24-9	320	National 1999 Residential A
Commonwealth of Australia	Chlorpyrifos	2921-88-2	160	National 1999 Residential A
Commonwealth of Australia	Bifenthrin	82657-04-3	600	National 1999 Residential A
Commonwealth of Australia	DDT+DDE+DDD		600	National 1999 Residential B
Commonwealth of Australia	DDT	50-29-3	600	National 1999 Residential B
Commonwealth of Australia	DDE	72-55-9	600	National 1999 Residential B
Commonwealth of Australia	DDD	72-54-8	600	National 1999 Residential B
Commonwealth of Australia	Aldrin and dieldrin		10	National 1999 Residential B
Commonwealth of Australia	Aldrin	309-00-2	10	National 1999 Residential B
Commonwealth of Australia	Dieldrin	60-57-1	10	National 1999 Residential B
Commonwealth of Australia	Chlordane	12789-03-6	90	National 1999 Residential B
Commonwealth of Australia	Endosulfan	115-29-7	400	National 1999 Residential B
Commonwealth of Australia	Endrin	72-20-8	20	National 1999 Residential B
Commonwealth of Australia	Heptachlor	76-44-8	10	National 1999 Residential B
Commonwealth of Australia	HCB(Hexachlorobenzene)	118-74-1	15	National 1999 Residential B
Commonwealth of Australia	Methoxychlor	72-43-5	500	National 1999 Residential B
Commonwealth of Australia	Mirex	2385-85-5	20	National 1999 Residential B
Commonwealth of Australia	Toxaphene	8001-35-2	30	National 1999 Residential B
Commonwealth of Australia	2,4,5-T	93-76-5	900	National 1999 Residential B
Commonwealth of Australia	2,4-D	94-75-7	1600	National 1999 Residential B
Commonwealth of Australia	MCPA	94-74-6	900	National 1999 Residential B
Commonwealth of Australia	MCPB	94-81-5	900	National 1999 Residential B
Commonwealth of Australia	Mecoprop	93-65-2	900	National 1999 Residential B
Commonwealth of Australia	Picloram	1918--2-1	6600	National 1999 Residential B
Commonwealth of Australia	Atrazine	1912-24-9	470	National 1999 Residential B
Commonwealth of Australia	Chlorpyrifos	2921-88-2	340	National 1999 Residential B
Commonwealth of Australia	Bifenthrin	82657-04-3	840	National 1999 Residential B
(Austrilia) Austrilian Capital Territory	DDT+DDE+DDD		240	National 1999 Residential A
(Austrilia) Austrilian Capital Territory	DDT	50-29-3	240	National 1999 Residential A
(Austrilia) Austrilian Capital Territory	DDE	72-55-9	240	National 1999 Residential A
(Austrilia) Austrilian Capital Territory	DDD	72-54-8	240	National 1999 Residential A
(Austrilia) Austrilian Capital Territory	Aldrin and dieldrin		6	National 1999 Residential A
(Austrilia) Austrilian Capital Territory	Aldrin	309-00-2	6	National 1999 Residential A
(Austrilia) Austrilian Capital Territory	Dieldrin	60-57-1	6	National 1999 Residential A
(Austrilia) Austrilian Capital Territory	Chlordane	12789-03-6	50	National 1999 Residential A
(Austrilia) Austrilian Capital Territory	Endosulfan	115-29-7	270	National 1999 Residential A
(Austrilia) Austrilian Capital Territory	Endrin	72-20-8	10	National 1999 Residential A
(Austrilia) Austrilian Capital Territory	Heptachlor	76-44-8	6	National 1999 Residential A
(Austrilia) Austrilian Capital Territory	HCB(Hexachlorobenzene)	118-74-1	10	National 1999 Residential A
(Austrilia) Austrilian Capital Territory	Methoxychlor	72-43-5	300	National 1999 Residential A
(Austrilia) Austrilian Capital Territory	Mirex	2385-85-5	10	National 1999 Residential A
(Austrilia) Austrilian Capital Territory	Toxaphene	8001-35-2	20	National 1999 Residential A
(Austrilia) Austrilian Capital Territory	2,4,5-T	93-76-5	600	National 1999 Residential A
(Austrilia) Austrilian Capital Territory	2,4-D	94-75-7	900	National 1999 Residential A
(Austrilia) Austrilian Capital Territory	MCPA	94-74-6	600	National 1999 Residential A
(Austrilia) Austrilian Capital Territory	MCPB	94-81-5	600	National 1999 Residential A
(Austrilia) Austrilian Capital Territory	Mecoprop	93-65-2	600	National 1999 Residential A
(Austrilia) Austrilian Capital Territory	Picloram	1918--2-1	4500	National 1999 Residential A
(Austrilia) Austrilian Capital Territory	Atrazine	1912-24-9	320	National 1999 Residential A
(Austrilia) Austrilian Capital Territory	Chlorpyrifos	2921-88-2	160	National 1999 Residential A
(Austrilia) Austrilian Capital Territory	Bifenthrin	82657-04-3	600	National 1999 Residential A
(Austrilia) Austrilian Capital Territory	DDT+DDE+DDD		600	National 1999 Residential B
(Austrilia) Austrilian Capital Territory	DDT	50-29-3	600	National 1999 Residential B
(Austrilia) Austrilian Capital Territory	DDE	72-55-9	600	National 1999 Residential B
(Austrilia) Austrilian Capital Territory	DDD	72-54-8	600	National 1999 Residential B
(Austrilia) Austrilian Capital Territory	Aldrin and dieldrin		10	National 1999 Residential B
(Austrilia) Austrilian Capital Territory	Aldrin	309-00-2	10	National 1999 Residential B
(Austrilia) Austrilian Capital Territory	Dieldrin	60-57-1	10	National 1999 Residential B
(Austrilia) Austrilian Capital Territory	Chlordane	12789-03-6	90	National 1999 Residential B
(Austrilia) Austrilian Capital Territory	Endosulfan	115-29-7	400	National 1999 Residential B
(Austrilia) Austrilian Capital Territory	Endrin	72-20-8	20	National 1999 Residential B
(Austrilia) Austrilian Capital Territory	Heptachlor	76-44-8	10	National 1999 Residential B
(Austrilia) Austrilian Capital Territory	HCB(Hexachlorobenzene)	118-74-1	15	National 1999 Residential B
(Austrilia) Austrilian Capital Territory	Methoxychlor	72-43-5	500	National 1999 Residential B
(Austrilia) Austrilian Capital Territory	Mirex	2385-85-5	20	National 1999 Residential B
(Austrilia) Austrilian Capital Territory	Toxaphene	8001-35-2	30	National 1999 Residential B
(Austrilia) Austrilian Capital Territory	2,4,5-T	93-76-5	900	National 1999 Residential B
(Austrilia) Austrilian Capital Territory	2,4-D	94-75-7	1600	National 1999 Residential B
(Austrilia) Austrilian Capital Territory	MCPA	94-74-6	900	National 1999 Residential B
(Austrilia) Austrilian Capital Territory	MCPB	94-81-5	900	National 1999 Residential B
(Austrilia) Austrilian Capital Territory	Mecoprop	93-65-2	900	National 1999 Residential B
(Austrilia) Austrilian Capital Territory	Picloram	1918--2-1	6600	National 1999 Residential B
(Austrilia) Austrilian Capital Territory	Atrazine	1912-24-9	470	National 1999 Residential B
(Austrilia) Austrilian Capital Territory	Chlorpyrifos	2921-88-2	340	National 1999 Residential B
(Austrilia) Austrilian Capital Territory	Bifenthrin	82657-04-3	840	National 1999 Residential B
(Austrilia) State of Queensland	DDT+DDE+DDD		240	National 1999 Residential A
(Austrilia) State of Queensland	DDT	50-29-3	240	National 1999 Residential A
(Austrilia) State of Queensland	DDE	72-55-9	240	National 1999 Residential A
(Austrilia) State of Queensland	DDD	72-54-8	240	National 1999 Residential A
(Austrilia) State of Queensland	Aldrin and dieldrin		6	National 1999 Residential A
(Austrilia) State of Queensland	Aldrin	309-00-2	6	National 1999 Residential A
(Austrilia) State of Queensland	Dieldrin	60-57-1	6	National 1999 Residential A
(Austrilia) State of Queensland	Chlordane	12789-03-6	50	National 1999 Residential A
(Austrilia) State of Queensland	Endosulfan	115-29-7	270	National 1999 Residential A
(Austrilia) State of Queensland	Endrin	72-20-8	10	National 1999 Residential A
(Austrilia) State of Queensland	Heptachlor	76-44-8	6	National 1999 Residential A
(Austrilia) State of Queensland	HCB(Hexachlorobenzene)	118-74-1	10	National 1999 Residential A
(Austrilia) State of Queensland	Methoxychlor	72-43-5	300	National 1999 Residential A
(Austrilia) State of Queensland	Mirex	2385-85-5	10	National 1999 Residential A
(Austrilia) State of Queensland	Toxaphene	8001-35-2	20	National 1999 Residential A
(Austrilia) State of Queensland	2,4,5-T	93-76-5	600	National 1999 Residential A
(Austrilia) State of Queensland	2,4-D	94-75-7	900	National 1999 Residential A
(Austrilia) State of Queensland	MCPA	94-74-6	600	National 1999 Residential A
(Austrilia) State of Queensland	MCPB	94-81-5	600	National 1999 Residential A
(Austrilia) State of Queensland	Mecoprop	93-65-2	600	National 1999 Residential A
(Austrilia) State of Queensland	Picloram	1918--2-1	4500	National 1999 Residential A
(Austrilia) State of Queensland	Atrazine	1912-24-9	320	National 1999 Residential A
(Austrilia) State of Queensland	Chlorpyrifos	2921-88-2	160	National 1999 Residential A
(Austrilia) State of Queensland	Bifenthrin	82657-04-3	600	National 1999 Residential A
(Austrilia) State of Queensland	DDT+DDE+DDD		600	National 1999 Residential B
(Austrilia) State of Queensland	DDT	50-29-3	600	National 1999 Residential B
(Austrilia) State of Queensland	DDE	72-55-9	600	National 1999 Residential B
(Austrilia) State of Queensland	DDD	72-54-8	600	National 1999 Residential B
(Austrilia) State of Queensland	Aldrin and dieldrin		10	National 1999 Residential B
(Austrilia) State of Queensland	Aldrin	309-00-2	10	National 1999 Residential B
(Austrilia) State of Queensland	Dieldrin	60-57-1	10	National 1999 Residential B
(Austrilia) State of Queensland	Chlordane	12789-03-6	90	National 1999 Residential B
(Austrilia) State of Queensland	Endosulfan	115-29-7	400	National 1999 Residential B
(Austrilia) State of Queensland	Endrin	72-20-8	20	National 1999 Residential B
(Austrilia) State of Queensland	Heptachlor	76-44-8	10	National 1999 Residential B
(Austrilia) State of Queensland	HCB(Hexachlorobenzene)	118-74-1	15	National 1999 Residential B
(Austrilia) State of Queensland	Methoxychlor	72-43-5	500	National 1999 Residential B
(Austrilia) State of Queensland	Mirex	2385-85-5	20	National 1999 Residential B
(Austrilia) State of Queensland	Toxaphene	8001-35-2	30	National 1999 Residential B
(Austrilia) State of Queensland	2,4,5-T	93-76-5	900	National 1999 Residential B
(Austrilia) State of Queensland	2,4-D	94-75-7	1600	National 1999 Residential B
(Austrilia) State of Queensland	MCPA	94-74-6	900	National 1999 Residential B
(Austrilia) State of Queensland	MCPB	94-81-5	900	National 1999 Residential B
(Austrilia) State of Queensland	Mecoprop	93-65-2	900	National 1999 Residential B
(Austrilia) State of Queensland	Picloram	1918--2-1	6600	National 1999 Residential B
(Austrilia) State of Queensland	Atrazine	1912-24-9	470	National 1999 Residential B
(Austrilia) State of Queensland	Chlorpyrifos	2921-88-2	340	National 1999 Residential B
(Austrilia) State of Queensland	Bifenthrin	82657-04-3	840	National 1999 Residential B
(Australia) State of Tasmania	DDT+DDE+DDD		240	National 1999 Residential A
(Australia) State of Tasmania	DDT	50-29-3	240	National 1999 Residential A
(Australia) State of Tasmania	DDE	72-55-9	240	National 1999 Residential A
(Australia) State of Tasmania	DDD	72-54-8	240	National 1999 Residential A
(Australia) State of Tasmania	Aldrin and dieldrin		6	National 1999 Residential A
(Australia) State of Tasmania	Aldrin	309-00-2	6	National 1999 Residential A
(Australia) State of Tasmania	Dieldrin	60-57-1	6	National 1999 Residential A
(Australia) State of Tasmania	Chlordane	12789-03-6	50	National 1999 Residential A
(Australia) State of Tasmania	Endosulfan	115-29-7	270	National 1999 Residential A
(Australia) State of Tasmania	Endrin	72-20-8	10	National 1999 Residential A
(Australia) State of Tasmania	Heptachlor	76-44-8	6	National 1999 Residential A
(Australia) State of Tasmania	HCB(Hexachlorobenzene)	118-74-1	10	National 1999 Residential A
(Australia) State of Tasmania	Methoxychlor	72-43-5	300	National 1999 Residential A
(Australia) State of Tasmania	Mirex	2385-85-5	10	National 1999 Residential A
(Australia) State of Tasmania	Toxaphene	8001-35-2	20	National 1999 Residential A
(Australia) State of Tasmania	2,4,5-T	93-76-5	600	National 1999 Residential A
(Australia) State of Tasmania	2,4-D	94-75-7	900	National 1999 Residential A
(Australia) State of Tasmania	MCPA	94-74-6	600	National 1999 Residential A
(Australia) State of Tasmania	MCPB	94-81-5	600	National 1999 Residential A
(Australia) State of Tasmania	Mecoprop	93-65-2	600	National 1999 Residential A
(Australia) State of Tasmania	Picloram	1918--2-1	4500	National 1999 Residential A
(Australia) State of Tasmania	Atrazine	1912-24-9	320	National 1999 Residential A
(Australia) State of Tasmania	Chlorpyrifos	2921-88-2	160	National 1999 Residential A
(Australia) State of Tasmania	Bifenthrin	82657-04-3	600	National 1999 Residential A
(Australia) State of Tasmania	DDT+DDE+DDD		600	National 1999 Residential B
(Australia) State of Tasmania	DDT	50-29-3	600	National 1999 Residential B
(Australia) State of Tasmania	DDE	72-55-9	600	National 1999 Residential B
(Australia) State of Tasmania	DDD	72-54-8	600	National 1999 Residential B
(Australia) State of Tasmania	Aldrin and dieldrin		10	National 1999 Residential B
(Australia) State of Tasmania	Aldrin	309-00-2	10	National 1999 Residential B
(Australia) State of Tasmania	Dieldrin	60-57-1	10	National 1999 Residential B
(Australia) State of Tasmania	Chlordane	12789-03-6	90	National 1999 Residential B
(Australia) State of Tasmania	Endosulfan	115-29-7	400	National 1999 Residential B
(Australia) State of Tasmania	Endrin	72-20-8	20	National 1999 Residential B
(Australia) State of Tasmania	Heptachlor	76-44-8	10	National 1999 Residential B
(Australia) State of Tasmania	HCB(Hexachlorobenzene)	118-74-1	15	National 1999 Residential B
(Australia) State of Tasmania	Methoxychlor	72-43-5	500	National 1999 Residential B
(Australia) State of Tasmania	Mirex	2385-85-5	20	National 1999 Residential B
(Australia) State of Tasmania	Toxaphene	8001-35-2	30	National 1999 Residential B
(Australia) State of Tasmania	2,4,5-T	93-76-5	900	National 1999 Residential B
(Australia) State of Tasmania	2,4-D	94-75-7	1600	National 1999 Residential B
(Australia) State of Tasmania	MCPA	94-74-6	900	National 1999 Residential B
(Australia) State of Tasmania	MCPB	94-81-5	900	National 1999 Residential B
(Australia) State of Tasmania	Mecoprop	93-65-2	900	National 1999 Residential B
(Australia) State of Tasmania	Picloram	1918--2-1	6600	National 1999 Residential B
(Australia) State of Tasmania	Atrazine	1912-24-9	470	National 1999 Residential B
(Australia) State of Tasmania	Chlorpyrifos	2921-88-2	340	National 1999 Residential B
(Australia) State of Tasmania	Bifenthrin	82657-04-3	840	National 1999 Residential B
(Australia) State of Tasmania	Aldrin + Dieldrin		2	Bull. 105,2012 FILL MATERIAL Level 1
(Australia) State of Tasmania	Aldrin	309-00-2	2	Bull. 105,2012 FILL MATERIAL Level 1
(Australia) State of Tasmania	Dieldrin	60-57-1	2	Bull. 105,2012 FILL MATERIAL Level 1
(Australia) State of Tasmania	DDT + DDD + DDE		2	Bull. 105,2012 FILL MATERIAL Level 1
(Australia) State of Tasmania	DDT	50-29-3	2	Bull. 105,2012 FILL MATERIAL Level 1
(Australia) State of Tasmania	DDE	72-55-9	2	Bull. 105,2012 FILL MATERIAL Level 1
(Australia) State of Tasmania	DDD	72-54-8	2	Bull. 105,2012 FILL MATERIAL Level 1
(Australia) State of Tasmania	Aldrin + Dieldrin		20	Bull. 105,2012 LOW LEVEL CONTAMINATED SOIL Level 2
(Australia) State of Tasmania	Aldrin	309-00-2	20	Bull. 105,2012 LOW LEVEL CONTAMINATED SOIL Level 2
(Australia) State of Tasmania	Dieldrin	60-57-1	20	Bull. 105,2012 LOW LEVEL CONTAMINATED SOIL Level 2
(Australia) State of Tasmania	DDT + DDD + DDE		200	Bull. 105,2012 LOW LEVEL CONTAMINATED SOIL Level 2
(Australia) State of Tasmania	DDT	50-29-3	200	Bull. 105,2012 LOW LEVEL CONTAMINATED SOIL Level 2
(Australia) State of Tasmania	DDE	72-55-9	200	Bull. 105,2012 LOW LEVEL CONTAMINATED SOIL Level 2
(Australia) State of Tasmania	DDD	72-54-8	200	Bull. 105,2012 LOW LEVEL CONTAMINATED SOIL Level 2
(Australia) New South Wales	Aldrin + dieldrin		10	Residential with gardens and accessible soil (homegrown produce contributing < 10% fruit and vegetable intake; no poultry), including children’s daycare centres, preschools, primary schools, townhouses, villas (NEHF A)3
(Australia) New South Wales	Aldrin	309-00-2	10	Residential with gardens and accessible soil (homegrown produce contributing < 10% fruit and vegetable intake; no poultry), including children’s daycare centres, preschools, primary schools, townhouses, villas (NEHF A)4
(Australia) New South Wales	Dieldrin	60-57-1	10	Residential with gardens and accessible soil (homegrown produce contributing < 10% fruit and vegetable intake; no poultry), including children’s daycare centres, preschools, primary schools, townhouses, villas (NEHF A)5
(Australia) New South Wales	Chlordane	12789-03-6	50	Residential with gardens and accessible soil (homegrown produce contributing < 10% fruit and vegetable intake; no poultry), including children’s daycare centres, preschools, primary schools, townhouses, villas (NEHF A)6
(Australia) New South Wales	DDT + DDD + DDE		200	Residential with gardens and accessible soil (homegrown produce contributing < 10% fruit and vegetable intake; no poultry), including children’s daycare centres, preschools, primary schools, townhouses, villas (NEHF A)7
(Australia) New South Wales	DDT	50-29-3	200	Residential with gardens and accessible soil (homegrown produce contributing < 10% fruit and vegetable intake; no poultry), including children’s daycare centres, preschools, primary schools, townhouses, villas (NEHF A)8
(Australia) New South Wales	DDD	72-54-8	200	Residential with gardens and accessible soil (homegrown produce contributing < 10% fruit and vegetable intake; no poultry), including children’s daycare centres, preschools, primary schools, townhouses, villas (NEHF A)9
(Australia) New South Wales	DDE	72-55-9	200	Residential with gardens and accessible soil (homegrown produce contributing < 10% fruit and vegetable intake; no poultry), including children’s daycare centres, preschools, primary schools, townhouses, villas (NEHF A)10
(Australia) New South Wales	Heptachlor	76-44-8	10	Residential with gardens and accessible soil (homegrown produce contributing < 10% fruit and vegetable intake; no poultry), including children’s daycare centres, preschools, primary schools, townhouses, villas (NEHF A)11
(Australia) New South Wales	Aldrin + dieldrin		40	Residential with minimal access to soil including high-rise apartments and ﬂats (NEHF D)
(Australia) New South Wales	Aldrin	309-00-2	40	Residential with minimal access to soil including high-rise apartments and ﬂats (NEHF D)
(Australia) New South Wales	Dieldrin	60-57-1	40	Residential with minimal access to soil including high-rise apartments and ﬂats (NEHF D)
(Australia) New South Wales	Chlordane	12789-03-6	200	Residential with minimal access to soil including high-rise apartments and ﬂats (NEHF D)
(Australia) New South Wales	DDT + DDD + DDE		800	Residential with minimal access to soil including high-rise apartments and ﬂats (NEHF D)
(Australia) New South Wales	DDT	50-29-3	800	Residential with minimal access to soil including high-rise apartments and ﬂats (NEHF D)
(Australia) New South Wales	DDD	72-54-8	800	Residential with minimal access to soil including high-rise apartments and ﬂats (NEHF D)
(Australia) New South Wales	DDE	72-55-9	800	Residential with minimal access to soil including high-rise apartments and ﬂats (NEHF D)
(Australia) New South Wales	Heptachlor	76-44-8	40	Residential with minimal access to soil including high-rise apartments and ﬂats (NEHF D)
(Australia) State of Victoria	DDT+DDE+DDD		240	National 1999 Residential A
(Australia) State of Victoria	DDT	50-29-3	240	National 1999 Residential A
(Australia) State of Victoria	DDE	72-55-9	240	National 1999 Residential A
(Australia) State of Victoria	DDD	72-54-8	240	National 1999 Residential A
(Australia) State of Victoria	Aldrin and dieldrin		6	National 1999 Residential A
(Australia) State of Victoria	Aldrin	309-00-2	6	National 1999 Residential A
(Australia) State of Victoria	Dieldrin	60-57-1	6	National 1999 Residential A
(Australia) State of Victoria	Chlordane	12789-03-6	50	National 1999 Residential A
(Australia) State of Victoria	Endosulfan	115-29-7	270	National 1999 Residential A
(Australia) State of Victoria	Endrin	72-20-8	10	National 1999 Residential A
(Australia) State of Victoria	Heptachlor	76-44-8	6	National 1999 Residential A
(Australia) State of Victoria	HCB(Hexachlorobenzene)	118-74-1	10	National 1999 Residential A
(Australia) State of Victoria	Methoxychlor	72-43-5	300	National 1999 Residential A
(Australia) State of Victoria	Mirex	2385-85-5	10	National 1999 Residential A
(Australia) State of Victoria	Toxaphene	8001-35-2	20	National 1999 Residential A
(Australia) State of Victoria	2,4,5-T	93-76-5	600	National 1999 Residential A
(Australia) State of Victoria	2,4-D	94-75-7	900	National 1999 Residential A
(Australia) State of Victoria	MCPA	94-74-6	600	National 1999 Residential A
(Australia) State of Victoria	MCPB	94-81-5	600	National 1999 Residential A
(Australia) State of Victoria	Mecoprop	93-65-2	600	National 1999 Residential A
(Australia) State of Victoria	Picloram	1918--2-1	4500	National 1999 Residential A
(Australia) State of Victoria	Atrazine	1912-24-9	320	National 1999 Residential A
(Australia) State of Victoria	Chlorpyrifos	2921-88-2	160	National 1999 Residential A
(Australia) State of Victoria	Bifenthrin	82657-04-3	600	National 1999 Residential A
(Australia) State of Victoria	DDT+DDE+DDD		600	National 1999 Residential B
(Australia) State of Victoria	DDT	50-29-3	600	National 1999 Residential B
(Australia) State of Victoria	DDE	72-55-9	600	National 1999 Residential B
(Australia) State of Victoria	DDD	72-54-8	600	National 1999 Residential B
(Australia) State of Victoria	Aldrin and dieldrin		10	National 1999 Residential B
(Australia) State of Victoria	Aldrin	309-00-2	10	National 1999 Residential B
(Australia) State of Victoria	Dieldrin	60-57-1	10	National 1999 Residential B
(Australia) State of Victoria	Chlordane	12789-03-6	90	National 1999 Residential B
(Australia) State of Victoria	Endosulfan	115-29-7	400	National 1999 Residential B
(Australia) State of Victoria	Endrin	72-20-8	20	National 1999 Residential B
(Australia) State of Victoria	Heptachlor	76-44-8	10	National 1999 Residential B
(Australia) State of Victoria	HCB(Hexachlorobenzene)	118-74-1	15	National 1999 Residential B
(Australia) State of Victoria	Methoxychlor	72-43-5	500	National 1999 Residential B
(Australia) State of Victoria	Mirex	2385-85-5	20	National 1999 Residential B
(Australia) State of Victoria	Toxaphene	8001-35-2	30	National 1999 Residential B
(Australia) State of Victoria	2,4,5-T	93-76-5	900	National 1999 Residential B
(Australia) State of Victoria	2,4-D	94-75-7	1600	National 1999 Residential B
(Australia) State of Victoria	MCPA	94-74-6	900	National 1999 Residential B
(Australia) State of Victoria	MCPB	94-81-5	900	National 1999 Residential B
(Australia) State of Victoria	Mecoprop	93-65-2	900	National 1999 Residential B
(Australia) State of Victoria	Picloram	1918--2-1	6600	National 1999 Residential B
(Australia) State of Victoria	Atrazine	1912-24-9	470	National 1999 Residential B
(Australia) State of Victoria	Chlorpyrifos	2921-88-2	340	National 1999 Residential B
(Australia) State of Victoria	Bifenthrin	82657-04-3	840	National 1999 Residential B
(Australia) State of Victoria	Organochlorine pesticides		1	Option#1 Fill Material upper limits
(Australia) State of Victoria	Aldrin	309-00-2	1	Option#1 Fill Material upper limits
(Australia) State of Victoria	hexachlorobenzene(HCB)	118-74-1	1	Option#1 Fill Material upper limits
(Australia) State of Victoria	alpha BHC	319-84-6	1	Option#1 Fill Material upper limits
(Australia) State of Victoria	beta BHC	319-85-7	1	Option#1 Fill Material upper limits
(Australia) State of Victoria	gamma BHC (lindane)	58-89-9	1	Option#1 Fill Material upper limits
(Australia) State of Victoria	delta BHC	319-85-7	1	Option#1 Fill Material upper limits
(Australia) State of Victoria	Chlordane	12789-03-6	1	Option#1 Fill Material upper limits
(Australia) State of Victoria	Dieldrin	60-57-1	1	Option#1 Fill Material upper limits
(Australia) State of Victoria	endrin	72-20-8	1	Option#1 Fill Material upper limits
(Australia) State of Victoria	endrin aldehyde	7421-93-4	1	Option#1 Fill Material upper limits
(Australia) State of Victoria	Heptachlor	76-44-8	1	Option#1 Fill Material upper limits
(Australia) State of Victoria	heptachlor epoxide	1024-57-3	1	Option#1 Fill Material upper limits
(Australia) State of Victoria	methoxychlor	72-43-5, 30667-99-3	1	Option#1 Fill Material upper limits
(Australia) State of Victoria	endosulfan I	959-98-8	1	Option#1 Fill Material upper limits
(Australia) State of Victoria	endosulfan II	33213-65-9	1	Option#1 Fill Material upper limits
(Australia) State of Victoria	endosulfan sulphate	1031-07-8	1	Option#1 Fill Material upper limits
(Australia) State of Victoria	DDT	50-29-3	1	Option#1 Fill Material upper limits
(Australia) State of Victoria	DDE	72-55-9	1	Option#1 Fill Material upper limits
(Australia) State of Victoria	DDD	72-54-8	1	Option#1 Fill Material upper limits
(Australia) State of Victoria	Aldrin + dieldrin		1.2	Option#1 Category C upper limits
(Australia) State of Victoria	Aldrin	309-00-2	1.2	Option#1 Category C upper limits
(Australia) State of Victoria	Dieldrin	60-57-1	1.2	Option#1 Category C upper limits
(Australia) State of Victoria	DDT + DDD + DDE		50	Option#1 Category C upper limits
(Australia) State of Victoria	DDT	50-29-3	50	Option#1 Category C upper limits
(Australia) State of Victoria	DDE	72-55-9	50	Option#1 Category C upper limits
(Australia) State of Victoria	DDD	72-54-8	50	Option#1 Category C upper limits
(Australia) State of Victoria	Chlordane	12789-03-6	4	Option#1 Category C upper limits
(Australia) State of Victoria	Heptachlor	76-44-8	1.2	Option#1 Category C upper limits
(Australia) State of Victoria	Other Organochlorine pesticides		10	Option#1 Category C upper limits
(Australia) State of Victoria	hexachlorobenzene(HCB)	118-74-1	10	Option#1 Category C upper limits
(Australia) State of Victoria	alpha BHC	319-84-6	10	Option#1 Category C upper limits
(Australia) State of Victoria	beta BHC	319-85-7	10	Option#1 Category C upper limits
(Australia) State of Victoria	gamma BHC (lindane)	58-89-9	10	Option#1 Category C upper limits
(Australia) State of Victoria	delta BHC	319-85-7	10	Option#1 Category C upper limits
(Australia) State of Victoria	Chlordane	12789-03-6	10	Option#1 Category C upper limits
(Australia) State of Victoria	endrin	72-20-8	10	Option#1 Category C upper limits
(Australia) State of Victoria	endrin aldehyde	7421-93-4	10	Option#1 Category C upper limits
(Australia) State of Victoria	Heptachlor	76-44-8	10	Option#1 Category C upper limits
(Australia) State of Victoria	heptachlor epoxide	1024-57-3	10	Option#1 Category C upper limits
(Australia) State of Victoria	methoxychlor	72-43-5	10	Option#1 Category C upper limits
(Australia) State of Victoria	endosulfan I	959-98-8	10	Option#1 Category C upper limits
(Australia) State of Victoria	endosulfan II	33213-65-9	10	Option#1 Category C upper limits
(Australia) State of Victoria	endosulfan sulphate	1031-07-8	10	Option#1 Category C upper limits
(Austrilia) State of Northern Australia	DDT+DDE+DDD		240	National 1999 Residential A
(Austrilia) State of Northern Australia	DDT	50-29-3	240	National 1999 Residential A
(Austrilia) State of Northern Australia	DDE	72-55-9	240	National 1999 Residential A
(Austrilia) State of Northern Australia	DDD	72-54-8	240	National 1999 Residential A
(Austrilia) State of Northern Australia	Aldrin and dieldrin		6	National 1999 Residential A
(Austrilia) State of Northern Australia	Aldrin	309-00-2	6	National 1999 Residential A
(Austrilia) State of Northern Australia	Dieldrin	60-57-1	6	National 1999 Residential A
(Austrilia) State of Northern Australia	Chlordane	12789-03-6	50	National 1999 Residential A
(Austrilia) State of Northern Australia	Endosulfan	115-29-7	270	National 1999 Residential A
(Austrilia) State of Northern Australia	Endrin	72-20-8	10	National 1999 Residential A
(Austrilia) State of Northern Australia	Heptachlor	76-44-8	6	National 1999 Residential A
(Austrilia) State of Northern Australia	HCB(Hexachlorobenzene)	118-74-1	10	National 1999 Residential A
(Austrilia) State of Northern Australia	Methoxychlor	72-43-5	300	National 1999 Residential A
(Austrilia) State of Northern Australia	Mirex	2385-85-5	10	National 1999 Residential A
(Austrilia) State of Northern Australia	Toxaphene	8001-35-2	20	National 1999 Residential A
(Austrilia) State of Northern Australia	2,4,5-T	93-76-5	600	National 1999 Residential A
(Austrilia) State of Northern Australia	2,4-D	94-75-7	900	National 1999 Residential A
(Austrilia) State of Northern Australia	MCPA	94-74-6	600	National 1999 Residential A
(Austrilia) State of Northern Australia	MCPB	94-81-5	600	National 1999 Residential A
(Austrilia) State of Northern Australia	Mecoprop	93-65-2	600	National 1999 Residential A
(Austrilia) State of Northern Australia	Picloram	1918--2-1	4500	National 1999 Residential A
(Austrilia) State of Northern Australia	Atrazine	1912-24-9	320	National 1999 Residential A
(Austrilia) State of Northern Australia	Chlorpyrifos	2921-88-2	160	National 1999 Residential A
(Austrilia) State of Northern Australia	Bifenthrin	82657-04-3	600	National 1999 Residential A
(Austrilia) State of Northern Australia	DDT+DDE+DDD		600	National 1999 Residential B
(Austrilia) State of Northern Australia	DDT	50-29-3	600	National 1999 Residential B
(Austrilia) State of Northern Australia	DDE	72-55-9	600	National 1999 Residential B
(Austrilia) State of Northern Australia	DDD	72-54-8	600	National 1999 Residential B
(Austrilia) State of Northern Australia	Aldrin and dieldrin		10	National 1999 Residential B
(Austrilia) State of Northern Australia	Aldrin	309-00-2	10	National 1999 Residential B
(Austrilia) State of Northern Australia	Dieldrin	60-57-1	10	National 1999 Residential B
(Austrilia) State of Northern Australia	Chlordane	12789-03-6	90	National 1999 Residential B
(Austrilia) State of Northern Australia	Endosulfan	115-29-7	400	National 1999 Residential B
(Austrilia) State of Northern Australia	Endrin	72-20-8	20	National 1999 Residential B
(Austrilia) State of Northern Australia	Heptachlor	76-44-8	10	National 1999 Residential B
(Austrilia) State of Northern Australia	HCB(Hexachlorobenzene)	118-74-1	15	National 1999 Residential B
(Austrilia) State of Northern Australia	Methoxychlor	72-43-5	500	National 1999 Residential B
(Austrilia) State of Northern Australia	Mirex	2385-85-5	20	National 1999 Residential B
(Austrilia) State of Northern Australia	Toxaphene	8001-35-2	30	National 1999 Residential B
(Austrilia) State of Northern Australia	2,4,5-T	93-76-5	900	National 1999 Residential B
(Austrilia) State of Northern Australia	2,4-D	94-75-7	1600	National 1999 Residential B
(Austrilia) State of Northern Australia	MCPA	94-74-6	900	National 1999 Residential B
(Austrilia) State of Northern Australia	MCPB	94-81-5	900	National 1999 Residential B
(Austrilia) State of Northern Australia	Mecoprop	93-65-2	900	National 1999 Residential B
(Austrilia) State of Northern Australia	Picloram	1918--2-1	6600	National 1999 Residential B
(Austrilia) State of Northern Australia	Atrazine	1912-24-9	470	National 1999 Residential B
(Austrilia) State of Northern Australia	Chlorpyrifos	2921-88-2	340	National 1999 Residential B
(Austrilia) State of Northern Australia	Bifenthrin	82657-04-3	840	National 1999 Residential B
(Austrilia) State of South Australia	DDT+DDE+DDD		240	National 1999 Residential A
(Austrilia) State of South Australia	DDT	50-29-3	240	National 1999 Residential A
(Austrilia) State of South Australia	DDE	72-55-9	240	National 1999 Residential A
(Austrilia) State of South Australia	DDD	72-54-8	240	National 1999 Residential A
(Austrilia) State of South Australia	Aldrin and dieldrin		6	National 1999 Residential A
(Austrilia) State of South Australia	Aldrin	309-00-2	6	National 1999 Residential A
(Austrilia) State of South Australia	Dieldrin	60-57-1	6	National 1999 Residential A
(Austrilia) State of South Australia	Chlordane	12789-03-6	50	National 1999 Residential A
(Austrilia) State of South Australia	Endosulfan	115-29-7	270	National 1999 Residential A
(Austrilia) State of South Australia	Endrin	72-20-8	10	National 1999 Residential A
(Austrilia) State of South Australia	Heptachlor	76-44-8	6	National 1999 Residential A
(Austrilia) State of South Australia	HCB(Hexachlorobenzene)	118-74-1	10	National 1999 Residential A
(Austrilia) State of South Australia	Methoxychlor	72-43-5	300	National 1999 Residential A
(Austrilia) State of South Australia	Mirex	2385-85-5	10	National 1999 Residential A
(Austrilia) State of South Australia	Toxaphene	8001-35-2	20	National 1999 Residential A
(Austrilia) State of South Australia	2,4,5-T	93-76-5	600	National 1999 Residential A
(Austrilia) State of South Australia	2,4-D	94-75-7	900	National 1999 Residential A
(Austrilia) State of South Australia	MCPA	94-74-6	600	National 1999 Residential A
(Austrilia) State of South Australia	MCPB	94-81-5	600	National 1999 Residential A
(Austrilia) State of South Australia	Mecoprop	93-65-2	600	National 1999 Residential A
(Austrilia) State of South Australia	Picloram	1918--2-1	4500	National 1999 Residential A
(Austrilia) State of South Australia	Atrazine	1912-24-9	320	National 1999 Residential A
(Austrilia) State of South Australia	Chlorpyrifos	2921-88-2	160	National 1999 Residential A
(Austrilia) State of South Australia	Bifenthrin	82657-04-3	600	National 1999 Residential A
(Austrilia) State of South Australia	DDT+DDE+DDD		600	National 1999 Residential B
(Austrilia) State of South Australia	DDT	50-29-3	600	National 1999 Residential B
(Austrilia) State of South Australia	DDE	72-55-9	600	National 1999 Residential B
(Austrilia) State of South Australia	DDD	72-54-8	600	National 1999 Residential B
(Austrilia) State of South Australia	Aldrin and dieldrin		10	National 1999 Residential B
(Austrilia) State of South Australia	Aldrin	309-00-2	10	National 1999 Residential B
(Austrilia) State of South Australia	Dieldrin	60-57-1	10	National 1999 Residential B
(Austrilia) State of South Australia	Chlordane	12789-03-6	90	National 1999 Residential B
(Austrilia) State of South Australia	Endosulfan	115-29-7	400	National 1999 Residential B
(Austrilia) State of South Australia	Endrin	72-20-8	20	National 1999 Residential B
(Austrilia) State of South Australia	Heptachlor	76-44-8	10	National 1999 Residential B
(Austrilia) State of South Australia	HCB(Hexachlorobenzene)	118-74-1	15	National 1999 Residential B
(Austrilia) State of South Australia	Methoxychlor	72-43-5	500	National 1999 Residential B
(Austrilia) State of South Australia	Mirex	2385-85-5	20	National 1999 Residential B
(Austrilia) State of South Australia	Toxaphene	8001-35-2	30	National 1999 Residential B
(Austrilia) State of South Australia	2,4,5-T	93-76-5	900	National 1999 Residential B
(Austrilia) State of South Australia	2,4-D	94-75-7	1600	National 1999 Residential B
(Austrilia) State of South Australia	MCPA	94-74-6	900	National 1999 Residential B
(Austrilia) State of South Australia	MCPB	94-81-5	900	National 1999 Residential B
(Austrilia) State of South Australia	Mecoprop	93-65-2	900	National 1999 Residential B
(Austrilia) State of South Australia	Picloram	1918--2-1	6600	National 1999 Residential B
(Austrilia) State of South Australia	Atrazine	1912-24-9	470	National 1999 Residential B
(Austrilia) State of South Australia	Chlorpyrifos	2921-88-2	340	National 1999 Residential B
(Austrilia) State of South Australia	Bifenthrin	82657-04-3	840	National 1999 Residential B
(Austrilia) State of South Australia	Aldrin and dieldrin		2	Table 2
(Austrilia) State of South Australia	Aldrin	309-00-2	2	Table 2
(Austrilia) State of South Australia	Dieldrin	60-57-1	2	Table 2
(Austrilia) State of South Australia	Heptachlor	76-44-8	2	Table 2
(Austrilia) State of South Australia	Chlordane	12789-03-6	2	Table 2
(Austrilia) State of South Australia	DDT	50-29-3	2	Table 2
(Austrilia) State of South Australia	Aldrin and dieldrin		2	Table 1 Intermediate
(Austrilia) State of South Australia	Aldrin	309-00-2	2	Table 1 Intermediate
(Austrilia) State of South Australia	Dieldrin	60-57-1	2	Table 1 Intermediate
(Austrilia) State of South Australia	Chlordane	12789-03-6	2	Table 1 Intermediate
(Austrilia) State of South Australia	DDT	50-29-3	2	Table 1 Intermediate
(Austrilia) State of South Australia	Heptachlor	76-44-8	2	Table 1 Intermediate
(Austrilia) State of South Australia	Aldrin and dieldrin		50	Table 1 Low-Level contaminated
(Austrilia) State of South Australia	Aldrin	309-00-2	50	Table 1 Low-Level contaminated
(Austrilia) State of South Australia	Dieldrin	60-57-1	50	Table 1 Low-Level contaminated
(Austrilia) State of South Australia	Chlordane	12789-03-6	50	Table 1 Low-Level contaminated
(Austrilia) State of South Australia	DDT	50-29-3	50	Table 1 Low-Level contaminated
(Austrilia) State of South Australia	Heptachlor	76-44-8	50	Table 1 Low-Level contaminated
(Austrilia) State of Western Australia	Aldrin plus dieldrin		10	Health Level A
(Austrilia) State of Western Australia	Aldrin	309-00-2	10	Health Level A
(Austrilia) State of Western Australia	Dieldrin	60-57-1	10	Health Level A
(Austrilia) State of Western Australia	Chlordane	12789-03-6	50	Health Level A
(Austrilia) State of Western Australia	DDT + DDD + DDE		200	Health Level A
(Austrilia) State of Western Australia	DDT	50-29-3	200	Health Level A
(Austrilia) State of Western Australia	DDE	72-55-9	200	Health Level A
(Austrilia) State of Western Australia	DDD	72-54-8	200	Health Level A
(Austrilia) State of Western Australia	Heptachlor	76-44-8	10	Health Level A
(Austrilia) State of Western Australia	Aldrin plus dieldrin		40	Health Level D
(Austrilia) State of Western Australia	Aldrin	309-00-2	40	Health Level D
(Austrilia) State of Western Australia	Dieldrin	60-57-1	40	Health Level D
(Austrilia) State of Western Australia	Chlordane	12789-03-6	200	Health Level D
(Austrilia) State of Western Australia	DDT + DDD + DDE		800	Health Level D
(Austrilia) State of Western Australia	DDT	50-29-3	800	Health Level D
(Austrilia) State of Western Australia	DDE	72-55-9	800	Health Level D
(Austrilia) State of Western Australia	DDD	72-54-8	800	Health Level D
(Austrilia) State of Western Australia	Heptachlor	76-44-8	40	Health Level D
7. Commonwealth of the Bahamas	Acrolein	107-02-8	0.05	Use Florida's RGVs
Commonwealth of the Bahamas	Alachlor	15972-60-8	11	Use Florida's RGVs
Commonwealth of the Bahamas	Aldicarb [or Temik]	116-06-3	68	Use Florida's RGVs
Commonwealth of the Bahamas	Aldrin	309-00-2	0.06	Use Florida's RGVs
Commonwealth of the Bahamas	Ametryn	834-12-8	670	Use Florida's RGVs
Commonwealth of the Bahamas	Atrazine	1912-24-9	4.3	Use Florida's RGVs
Commonwealth of the Bahamas	Baygon [or Propoxur]	114-26-1	280	Use Florida's RGVs
Commonwealth of the Bahamas	Bayleton	43121-43-3	2400	Use Florida's RGVs
Commonwealth of the Bahamas	Benomyl	17804-35-2	4000	Use Florida's RGVs
Commonwealth of the Bahamas	Bentazon	25057-89-0	2100	Use Florida's RGVs
Commonwealth of the Bahamas	Bromacil	314-40-9	7500	Use Florida's RGVs
Commonwealth of the Bahamas	Bromoxynil	1689-84-5	1600	Use Florida's RGVs
Commonwealth of the Bahamas	Captafol	2425-06-1	110	Use Florida's RGVs
Commonwealth of the Bahamas	Captan	133-06-2	230	Use Florida's RGVs
Commonwealth of the Bahamas	Carbaryl [or Sevin]	63-25-2	7700	Use Florida's RGVs
Commonwealth of the Bahamas	Carbofuran	1563-66-2	130	Use Florida's RGVs
Commonwealth of the Bahamas	Carbophenothion [or Trithion]	786-19-6	11	Use Florida's RGVs
Commonwealth of the Bahamas	Carboxin	5234-68-4	7400	Use Florida's RGVs
Commonwealth of the Bahamas	Chloramben	133-90-4	960	Use Florida's RGVs
Commonwealth of the Bahamas	Chlordane (total)		2.8	Use Florida's RGVs
Commonwealth of the Bahamas	Chlordane	57-74-9	2.8	Use Florida's RGVs
Commonwealth of the Bahamas	1,2,4,5,6,7,8,9-octachloro-3a,4,7,7a-tetrahydro-7-methanoinden	12789-03-6	2.8	Use Florida's RGVs
Commonwealth of the Bahamas	Chloronaphthalene, beta-	91-58-7	5000	Use Florida's RGVs
Commonwealth of the Bahamas	Chloronitrobenzene, o-	88-73-3	22	Use Florida's RGVs
Commonwealth of the Bahamas	Chloronitrobenzene, p-	100-00-5	31	Use Florida's RGVs
Commonwealth of the Bahamas	Chlorothalonil [or Bravo]	1897-45-6	88	Use Florida's RGVs
Commonwealth of the Bahamas	Chlorpropham	101-21-3	16000	Use Florida's RGVs
Commonwealth of the Bahamas	Chlorpyrifos	2921-88-2	250	Use Florida's RGVs
Commonwealth of the Bahamas	Coumaphos	56-72-4	21	Use Florida's RGVs
Commonwealth of the Bahamas	Cyhalothrin [or Karate]	68085-85-8	420	Use Florida's RGVs
Commonwealth of the Bahamas	Cypermethrin	52315-07-8	840	Use Florida's RGVs
Commonwealth of the Bahamas	Diallate	2303-16-4	16	Use Florida's RGVs
Commonwealth of the Bahamas	Diazinon	333-41-5	70	Use Florida's RGVs
Commonwealth of the Bahamas	Dibromo-3-chloropropane, 1,2- [or DBCP, 1,2-]	96-12-8	0.7	Use Florida's RGVs
Commonwealth of the Bahamas	Dibromoethane, 1,2- [or EDB]	106-93-4	0.1	Use Florida's RGVs
Commonwealth of the Bahamas	Dicamba	1918-00-9	2300	Use Florida's RGVs
Commonwealth of the Bahamas	Dichlorodiphenyldichloroethane, p,p'- [or DDD, 4,4'-]	72-54-8	4.2	Use Florida's RGVs
Commonwealth of the Bahamas	Dichlorodiphenyldichloroethylene, p,p'- [or DDE, 4,4'-]	72-55-9	2.9	Use Florida's RGVs
Commonwealth of the Bahamas	Dichlorodiphenyltrichloroethane, p,p'- [or DDT, 4,4'-]	50-29-3	2.9	Use Florida's RGVs
Commonwealth of the Bahamas	Dichlorophenoxy acetic acid, 2,4-	94-75-7	770	Use Florida's RGVs
Commonwealth of the Bahamas	Dichlorprop	120-36-5	370	Use Florida's RGVs
Commonwealth of the Bahamas	Dichlorvos	62-73-7	0.3	Use Florida's RGVs
Commonwealth of the Bahamas	Dicofol [or Kelthane]	115-32-2	2.2	Use Florida's RGVs
Commonwealth of the Bahamas	Dieldrin	60-57-1	0.06	Use Florida's RGVs
Commonwealth of the Bahamas	Dimethoate	60-51-5	13	Use Florida's RGVs
Commonwealth of the Bahamas	Dimethrin	70-38-2	24000	Use Florida's RGVs
Commonwealth of the Bahamas	Dinoseb	88-85-7	65	Use Florida's RGVs
Commonwealth of the Bahamas	Diquat	85-00-7	190	Use Florida's RGVs
Commonwealth of the Bahamas	Disulfoton	298-04-4	3.3	Use Florida's RGVs
Commonwealth of the Bahamas	Diuron	330-54-1	150	Use Florida's RGVs
Commonwealth of the Bahamas	Endosulfan (alpha+beta+sulfate)	115-29-7	450	Use Florida's RGVs
Commonwealth of the Bahamas	Endosulfan I (alpha)	959-98-8	450	Use Florida's RGVs
Commonwealth of the Bahamas	Endosulfan II (beta)	33213-65-9	450	Use Florida's RGVs
Commonwealth of the Bahamas	Endosulfan sulfate	1031-07-8	450	Use Florida's RGVs
Commonwealth of the Bahamas	Endothall	145-73-3	1800	Use Florida's RGVs
Commonwealth of the Bahamas	Endrin	72-20-8	25	Use Florida's RGVs
Commonwealth of the Bahamas	Ethion	563-12-2	42	Use Florida's RGVs
Commonwealth of the Bahamas	Ethoprop	13194-48-4	7.4	Use Florida's RGVs
Commonwealth of the Bahamas	Ethyl dipropylthiocarbamate, S- [or EPTC]	759-94-4	1400	Use Florida's RGVs
Commonwealth of the Bahamas	Ethyl p-nitrophenyl phenylphosphorothioate [or EPN]	2104-64-5	0.8	Use Florida's RGVs
Commonwealth of the Bahamas	Fenamiphos	22224-92-6	19	Use Florida's RGVs
Commonwealth of the Bahamas	Fensulfothion	115-90-2	19	Use Florida's RGVs
Commonwealth of the Bahamas	Fluometuron	2164-17-2	980	Use Florida's RGVs
Commonwealth of the Bahamas	Fonofos	944-22-9	140	Use Florida's RGVs
Commonwealth of the Bahamas	Glyphosate [or Roundup]	1071-83-6	8800	Use Florida's RGVs
Commonwealth of the Bahamas	Guthion [or Methyl azinphos]	86-50-0	120	Use Florida's RGVs
Commonwealth of the Bahamas	Heptachlor	76-44-8	0.2	Use Florida's RGVs
Commonwealth of the Bahamas	Hexachlorocyclohexane, alpha- [or BHC, alpha-]	319-84-6	0.1	Use Florida's RGVs
Commonwealth of the Bahamas	Hexachlorocyclohexane, beta- [BHC, beta-]	319-85-7	0.5	Use Florida's RGVs
Commonwealth of the Bahamas	Hexachlorocyclohexane, delta- [or BHC, delta-]	319-86-8	24	Use Florida's RGVs
Commonwealth of the Bahamas	Hexachlorocyclohexane, gamma- [or Lindane or BHC,gamma-]	58-89-9	0.7	Use Florida's RGVs
Commonwealth of the Bahamas	Hexachlorocyclopentadiene	77-47-4	9.5	Use Florida's RGVs
Commonwealth of the Bahamas	Hexachlorophene	70-30-4	26	Use Florida's RGVs
Commonwealth of the Bahamas	Hexazinone	51235-04-2	2300	Use Florida's RGVs
Commonwealth of the Bahamas	Linuron	330-55-2	160	Use Florida's RGVs
Commonwealth of the Bahamas	Malathion	121-75-5	1500	Use Florida's RGVs
Commonwealth of the Bahamas	Maneb	12427-38-2	410	Use Florida's RGVs
Commonwealth of the Bahamas	Merphos	150-50-5	2.5	Use Florida's RGVs
Commonwealth of the Bahamas	Methamidophos	10265-92-6	3.1	Use Florida's RGVs
Commonwealth of the Bahamas	Methidathion	950-37-8	68	Use Florida's RGVs
Commonwealth of the Bahamas	Methomyl	16752-77-5	38	Use Florida's RGVs
Commonwealth of the Bahamas	Methoxychlor	72-43-5	420	Use Florida's RGVs
Commonwealth of the Bahamas	Methyl parathion [or Parathion, methyl]	298-00-0	20	Use Florida's RGVs
Commonwealth of the Bahamas	Metolachlor	51218-45-2	12000	Use Florida's RGVs
Commonwealth of the Bahamas	Metribuzin	21087-64-9	54	Use Florida's RGVs
Commonwealth of the Bahamas	Mevinphos	7786-34-7	18	Use Florida's RGVs
Commonwealth of the Bahamas	Molinate	2212-67-1	120	Use Florida's RGVs
Commonwealth of the Bahamas	Naled	300-76-5	150	Use Florida's RGVs
Commonwealth of the Bahamas	Octamethylpyrophosphoramide	152-16-9	130	Use Florida's RGVs
Commonwealth of the Bahamas	Oxamyl	23135-22-0	1700	Use Florida's RGVs
Commonwealth of the Bahamas	Paraquat	1910-42-5	340	Use Florida's RGVs
Commonwealth of the Bahamas	Parathion	56-38-2	500	Use Florida's RGVs
Commonwealth of the Bahamas	Pebulate	1114-71-2	2000	Use Florida's RGVs
Commonwealth of the Bahamas	Pendimethalin	40487-42-1	3200	Use Florida's RGVs
Commonwealth of the Bahamas	Permethrin	52645-53-1	4200	Use Florida's RGVs
Commonwealth of the Bahamas	Phenmedipham [or Betanal]	13684-63-4	21000	Use Florida's RGVs
Commonwealth of the Bahamas	Phorate	298-02-2	16	Use Florida's RGVs
Commonwealth of the Bahamas	Phosmet	732-11-6	1600	Use Florida's RGVs
Commonwealth of the Bahamas	Prometon	1610-18-0	1200	Use Florida's RGVs
Commonwealth of the Bahamas	Prometryn	7287-19-6	320	Use Florida's RGVs
Commonwealth of the Bahamas	Propachlor	1918-16-7	990	Use Florida's RGVs
Commonwealth of the Bahamas	Propanil	709-98-8	390	Use Florida's RGVs
Commonwealth of the Bahamas	Propazine	139-40-2	1600	Use Florida's RGVs
Commonwealth of the Bahamas	Propionic acid, 2-(2-methyl-4-chlorophenoxy) [or MCPP]	93-65-2	64	Use Florida's RGVs
Commonwealth of the Bahamas	Pydrin [or Fenvalerate]	51630-58-1	2100	Use Florida's RGVs
Commonwealth of the Bahamas	Resmethrin	10453-86-8	2500	Use Florida's RGVs
Commonwealth of the Bahamas	Ronnel	299-84-3	4200	Use Florida's RGVs
Commonwealth of the Bahamas	Simazine	122-34-9	7.8	Use Florida's RGVs
Commonwealth of the Bahamas	Strychnine	57-24-9	23	Use Florida's RGVs
Commonwealth of the Bahamas	Terbacil	5902-51-2	920	Use Florida's RGVs
Commonwealth of the Bahamas	Terbufos	13071-79-9	1.9	Use Florida's RGVs
Commonwealth of the Bahamas	Terbutryn	886-50-0	88	Use Florida's RGVs
Commonwealth of the Bahamas	Tetraethyl dithiopyrophosphate	3689-24-5	35	Use Florida's RGVs
Commonwealth of the Bahamas	Thiobencarb	28249-77-6	810	Use Florida's RGVs
Commonwealth of the Bahamas	Thiram	137-26-8	400	Use Florida's RGVs
Commonwealth of the Bahamas	Triallate	2303-17-5	980	Use Florida's RGVs
Commonwealth of the Bahamas	Tributyltin oxide	56-35-9	25	Use Florida's RGVs
Commonwealth of the Bahamas	Trichlorophenoxy propionic acid, 2, (2, 4, 5-) [or Silvex]	93-72-1	660	Use Florida's RGVs
Commonwealth of the Bahamas	Trichlorophenoxy acetic acid, 2,4,5-	93-76-5	690	Use Florida's RGVs
Commonwealth of the Bahamas	Trichlorophenol, 2,4,5-	95-95-4	7700	Use Florida's RGVs
Commonwealth of the Bahamas	Trichlorophenol, 2,4,6-	88--6-2	70	Use Florida's RGVs
Commonwealth of the Bahamas	Trifluralin	1582-09-8	92	Use Florida's RGVs
Commonwealth of the Bahamas	Vernam	1929-77-7	51	Use Florida's RGVs
Commonwealth of the Bahamas	Zineb	12122-67-7	4100	Use Florida's RGVs
8. Republic of Belarus	0 - (2,4-dichlorophenyl)-S-propyl-O-etiltiofosfat	Unknown	0.1	Appears to use Russian standards
Republic of Belarus	[1 - (4-nitrophenyl)-2-amino-1, 3 -propanediol] Nitrate salt	Unknown	0.02	Appears to use Russian standards
Republic of Belarus	2,3,6-TBA	3426-62-8	0.15	Appears to use Russian standards
Republic of Belarus	2-methyl-4-dimethylaminomethyl-benzimidazol-5-ol dihydrochloride	Unknown	0.03	Appears to use Russian standards
Republic of Belarus	2-oxo-2 ,5-dihydrofuran (assumed to be 2(SH)-Furanone)	497-23-4	0.4	Appears to use Russian standards
Republic of Belarus	2 chloroethylphosphonic acid benzimidazole salt	134576-33-3	0.5	Appears to use Russian standards
Republic of Belarus	5-ethyl-5-hydroxy-methyl-2-(2-furyl)-1,3-Dioxane	Unknown	0.2	Appears to use Russian standards
Republic of Belarus	6-methyl-2-thiouracil sodium salt	Unknown	0.1	Appears to use Russian standards
Republic of Belarus	fosetyl aluminum	39148-24-8	0.5	Appears to use Russian standards
Republic of Belarus	amidosulfuron	120923-37-7	0.25	Appears to use Russian standards
Republic of Belarus	acetochlor	34256-82-1	0.5	Appears to use Russian standards
Republic of Belarus	acifluorfen	50594-66-6	0.2	Appears to use Russian standards
Republic of Belarus	Benzoilmuravinoy acid sodium salt	Unknown	0.5	Appears to use Russian standards
Republic of Belarus	benomyl	17804-35-2	0.1	Appears to use Russian standards
Republic of Belarus	Bromopropylate	18181-80-1	0.05	Appears to use Russian standards
Republic of Belarus	bensultap	17606-31-4	0.06	Appears to use Russian standards
Republic of Belarus	Bensulfuron Methyl	84087-01-4	0.02	Appears to use Russian standards
Republic of Belarus	Bentazon	25057-89-0	0.15	Appears to use Russian standards
Republic of Belarus	bifenthrin	82657-04-3	0.1	Appears to use Russian standards
Republic of Belarus	4-triphenylphosphonium bromide methylbenzaldehyde +4 metilentrifenilfosfony bromide 4 nitrodifenilazo-methine	Unknown	0.25	Appears to use Russian standards
Republic of Belarus	bromoxynil	1689-84-5	0.1	Appears to use Russian standards
Republic of Belarus	bromophos	2104-96-3	0.2	Appears to use Russian standards
Republic of Belarus	bromuconazole	116255-48-2	0.1	Appears to use Russian standards
Republic of Belarus	bronopol	52-51-7	0.5	Appears to use Russian standards
Republic of Belarus	butoxide(assumed to be Piperonyl butoxide)	51-03-6	0.6	Appears to use Russian standards
Republic of Belarus	Galaksifopmetil	Unknown	0.15	Appears to use Russian standards
Republic of Belarus	Galaksifopetoksietil	Unknown	0.15	Appears to use Russian standards
Republic of Belarus	Hexaflumuron	86479-06-3	0.08	Appears to use Russian standards
Republic of Belarus	hexachlorobenzene	118-74-1	0.03	Appears to use Russian standards
Republic of Belarus	Hexythiazox	78587-05-0	0.1	Appears to use Russian standards
Republic of Belarus	Hydrazinium bis-2-hotel fosfonat	Unknown	0.5	Appears to use Russian standards
Republic of Belarus	glyphosate-trimesium	81591-81-3	0.8	Appears to use Russian standards
Republic of Belarus	Glufosinate-ammonium	77182-82-2	0.1	Appears to use Russian standards
Republic of Belarus	Guazatine	19010-48-1	0.1	Appears to use Russian standards
Republic of Belarus	A (+) -1 - (p-nitrophenol) -1,3 -dioksiizopropil-ammonium-2-chloroethylphosphonic acid	Unknown	0.5	Appears to use Russian standards
Republic of Belarus	Dimethenamid	87674-68-8	0.1	Appears to use Russian standards
Republic of Belarus	diafenthiuron	80060-09-9	0.2	Appears to use Russian standards
Republic of Belarus	Diquat	85-00-7	0.2	Appears to use Russian standards
Republic of Belarus	dimethoate	60-51-5	0.1	Appears to use Russian standards
Republic of Belarus	dinocap	39300-45-3	0.02	Appears to use Russian standards
Republic of Belarus	Dipropetrin (assumed to be Dipropetryn)	4147-51-7	0.3	Appears to use Russian standards
Republic of Belarus	dithianon	3347-22-6	0.02	Appears to use Russian standards
Republic of Belarus	Diphenamid	957-51-7	0.25	Appears to use Russian standards
Republic of Belarus	difenoconazole	119446-68-3	0.1	Appears to use Russian standards
Republic of Belarus	Diflufenican	83164-33-4	0.05	Appears to use Russian standards
Republic of Belarus	dichlorprop,dichlorprop-P of	120-36-5	0.1	Appears to use Russian standards
Republic of Belarus	Dichlorvos	62-73-7	0.03	Appears to use Russian standards
Republic of Belarus	dichlofluanid	1085-98-9	0.2	Appears to use Russian standards
Republic of Belarus	Isoproturon	34123-59-6	0.05	Appears to use Russian standards
Republic of Belarus	imazaquin	81335-37-7	0.3	Appears to use Russian standards
Republic of Belarus	imazamethabenz	100728-84-5	0.3	Appears to use Russian standards
Republic of Belarus	imazapyr	81334-34-1	0.5	Appears to use Russian standards
Republic of Belarus	imazethapyr	81335-77-5	0.1	Appears to use Russian standards
Republic of Belarus	ioxynil	1689-83-4	0.2	Appears to use Russian standards
Republic of Belarus	iprodione	36734-19-7	0.15	Appears to use Russian standards
Republic of Belarus	captan	133-06-2	1	Appears to use Russian standards
Republic of Belarus	carbendazim	10605-21-7	0.1	Appears to use Russian standards
Republic of Belarus	carboxin	5234-68-4	0.05	Appears to use Russian standards
Republic of Belarus	quinclorac	84087-01-4	0.2	Appears to use Russian standards
Republic of Belarus	clethodim	99129-21-2	0.1	Appears to use Russian standards
Republic of Belarus	clopyralid	1702-17-6	0.1	Appears to use Russian standards
Republic of Belarus	clofentezine	74115-24-5	0.07	Appears to use Russian standards
Republic of Belarus	lenacil	2164-08-1	1	Appears to use Russian standards
Republic of Belarus	Lambdacialotrina (assumed to be Lambda-cialotrinal)	91465-08-6	0.05	Appears to use Russian standards
Republic of Belarus	Mancozeb	8018-01-7	0.1	Appears to use Russian standards
Republic of Belarus	Copper(II) sulfate	7758-98-7	0.1	Appears to use Russian standards
Republic of Belarus	metazachlor	67129-08-2	0.1	Appears to use Russian standards
Republic of Belarus	metazin	57-68-1	0.1	Appears to use Russian standards
Republic of Belarus	metamitron	41394-05-2	0.4	Appears to use Russian standards
Republic of Belarus	methoxychlor	72-43-5	1.6	Appears to use Russian standards
Republic of Belarus	metolachlor	51218-45-2	0.02	Appears to use Russian standards
Republic of Belarus	Metobromuron	3060-89-7	0.1	Appears to use Russian standards
Republic of Belarus	molinate	2212-67-1	0.9	Appears to use Russian standards
Republic of Belarus	monolinuron	1746-81-2	0.7	Appears to use Russian standards
Republic of Belarus	MCPA	94-74-6	0.04	Appears to use Russian standards
Republic of Belarus	N-(4-chlorophenyl) -4,6-dimethyl-3-Carboxypyridin-2-one	Unknown	0.02	Appears to use Russian standards
Republic of Belarus	N, N-di (β-hydroxyethyl)-morpholine chloride	Unknown	0.15	Appears to use Russian standards
Republic of Belarus	2,6-lutidine N-oxide	1073-23-0	0.1	Appears to use Russian standards
Republic of Belarus	Trichloroacetic acid	1976--3-9	0.2	Appears to use Russian standards
Republic of Belarus	norepinephrine	138-65-8	0.7	Appears to use Russian standards
Republic of Belarus	Oxadixyl	77732-09-3	0.4	Appears to use Russian standards
Republic of Belarus	Oxyfluorfen	42874-03-3	0.2	Appears to use Russian standards
Republic of Belarus	pebulate	1114-71-2	0.6	Appears to use Russian standards
Republic of Belarus	pendimethalin	40487-42-1	0.15	Appears to use Russian standards
Republic of Belarus	Panthenol	81-13-0	0.6	Appears to use Russian standards
Republic of Belarus	permethrin	52645-53-1	0.05	Appears to use Russian standards
Republic of Belarus	Pyrazosulfuron ethyl	93697-74-6	0.2	Appears to use Russian standards
Republic of Belarus	pyridaben	96489-71-3	0.3	Appears to use Russian standards
Republic of Belarus	pyridate	55512-33-9	0.03	Appears to use Russian standards
Republic of Belarus	pyridaphenthion	119-12-0	0.05	Appears to use Russian standards
Republic of Belarus	Primisulfuron-methyl	6209-51-0	0.1	Appears to use Russian standards
Republic of Belarus	Propargyl alcohol	107-19-7	0.4	Appears to use Russian standards
Republic of Belarus	Propaquizafop	111479-05-1	0.15	Appears to use Russian standards
Republic of Belarus	propachlor	1918-16-7	0.2	Appears to use Russian standards
Republic of Belarus	propetamphos	31218-83-4	0.02	Appears to use Russian standards
Republic of Belarus	propyzamide	23950-58-5	0.2	Appears to use Russian standards
Republic of Belarus	prochloraz	67747-09-5	0.3	Appears to use Russian standards
Republic of Belarus	rimsulfuron	122931-48-0	0.03	Appears to use Russian standards
Republic of Belarus	sethoxydim	74051-80-2	0.2	Appears to use Russian standards
Republic of Belarus	sulfometuron methyl potassium salt	Unknown	0.04	Appears to use Russian standards
Republic of Belarus	tebuconazole	107534-96-3	1	Appears to use Russian standards
Republic of Belarus	temephos	3383-96-8	0.6	Appears to use Russian standards
Republic of Belarus	terbacil	5902-51-2	0.4	Appears to use Russian standards
Republic of Belarus	terbumeton	33693-04-8	0.2	Appears to use Russian standards
Republic of Belarus	terbuthylazine	5915-41-3	0.04	Appears to use Russian standards
Republic of Belarus	Terbutiuron(assumed to be Tebuthiuron)	34014-18-1	0.05	Appears to use Russian standards
Republic of Belarus	terbutryn	886-50-0	0.3	Appears to use Russian standards
Republic of Belarus	terbufos	13071-79-9	0.05	Appears to use Russian standards
Republic of Belarus	thiabendazole	148-79-8	1	Appears to use Russian standards
Republic of Belarus	thidiazuron	51707-55-2	0.05	Appears to use Russian standards
Republic of Belarus	thiodicarb	59669-26-0	0.5	Appears to use Russian standards
Republic of Belarus	thiophanate-methyl	23564-05-8	0.4	Appears to use Russian standards
Republic of Belarus	thiocyclam	31895-22-4	0.07	Appears to use Russian standards
Republic of Belarus	thiram	137-26-8	0.06	Appears to use Russian standards
Republic of Belarus	Tifensulfurop-methyl (assumed to be Thifensulfuron-Methyl)	79277-27-3	0.05	Appears to use Russian standards
Republic of Belarus	triallate	2303-17-5	0.05	Appears to use Russian standards
Republic of Belarus	triasulfuron	82097-50-5	0.1	Appears to use Russian standards
Republic of Belarus	Trimorfamid	60029-23-4	0.4	Appears to use Russian standards
Republic of Belarus	trifluralin	1582-09-8	0.1	Appears to use Russian standards
Republic of Belarus	triforine	26644-46-2	0.03	Appears to use Russian standards
Republic of Belarus	fenazaquin	120928-09-8	0.2	Appears to use Russian standards
Republic of Belarus	Fenoksapropetil (assumed to be Fenoxaprop-ethyl)	66441-23-4	0.04	Appears to use Russian standards
Republic of Belarus	fenoxycarb	79127-80-3	0.03	Appears to use Russian standards
Republic of Belarus	phenoxypropionic acid derivatives	Unknown	0.02	Appears to use Russian standards
Republic of Belarus	fenpiclonil	74738-17-3	0.05	Appears to use Russian standards
Republic of Belarus	fenpyroximate	134098-61-6	0.3	Appears to use Russian standards
Republic of Belarus	fenpropathrin	39515-41-8	0.05	Appears to use Russian standards
Republic of Belarus	fenpropidine	67306-00-7	0.4	Appears to use Russian standards
Republic of Belarus	fenpropimorph	67306-03-0	0.5	Appears to use Russian standards
Republic of Belarus	fenthion	55-38-9	0.1	Appears to use Russian standards
Republic of Belarus	phenthoate	2597-03-7	0.4	Appears to use Russian standards
Republic of Belarus	Fluazifopbutil(assumed to be Fluazifop Butyl)	69806-50-4	0.3	Appears to use Russian standards
Republic of Belarus	fludioxonil	131341-86-1	0.2	Appears to use Russian standards
Republic of Belarus	Fluometuron	2164-17-2	0.03	Appears to use Russian standards
Republic of Belarus	flusilazole	85509-19-9	0.5	Appears to use Russian standards
Republic of Belarus	Fluorochloridone	61213-25-0	0.03	Appears to use Russian standards
Republic of Belarus	Flyuvalinat(assumed to be Fluvalinate)	102851-06-9	0.01	Appears to use Russian standards
Republic of Belarus	folpet	133-07-3	0.1	Appears to use Russian standards
Republic of Belarus	formothion	2540-82-1	0.2	Appears to use Russian standards
12. Federative Republic of Brizil	Aldrin	309-00-2	0,01	Residential
Federative Republic of Brizil	Dieldrin	60-57-1	0,6	Residential
Federative Republic of Brizil	Endrin	72-20-8	1,5	Residential
Federative Republic of Brizil	DDT	50-29-3	2	Residential
Federative Republic of Brizil	DDD	72-54-8	3	Residential
Federative Republic of Brizil	DDE	72-55-9	1	Residential
Federative Republic of Brizil	HCH beta	319-85-7	0,1	Residential
Federative Republic of Brizil	HCH-gama(Lindano)	58-89-9	0,07	Residential
(Brizil) State of San Paolo	Aldrin	309-00-2	0,01	Residential
(Brizil) State of San Paolo	Dieldrin	60-57-1	0,6	Residential
(Brizil) State of San Paolo	Endrin	72-20-8	1,5	Residential
(Brizil) State of San Paolo	DDT	50-29-3	2	Residential
(Brizil) State of San Paolo	DDD	72-54-8	3	Residential
(Brizil) State of San Paolo	DDE	72-55-9	1	Residential
(Brizil) State of San Paolo	HCHbeta	319-85-7	0,1	Residential
(Brizil) State of San Paolo	HCHgama(Lindano)	58-89-9	0,07	Residential
13. Republic of Bulgaria	Hexachlorobenzene	118-74-1	0.025	Appendix No.1 to Art.3 Table 4 Protective concentrations
Republic of Bulgaria	alpha-beta-gamma HCH		0.001	Appendix No.1 to Art.3 Table 4 Protective concentrations
Republic of Bulgaria	alpha-HCH	319-84-6	0.001	Appendix No.1 to Art.3 Table 4 Protective concentrations
Republic of Bulgaria	beta-HCH	319-85-7	0.001	Appendix No.1 to Art.3 Table 4 Protective concentrations
Republic of Bulgaria	Lindane	58-89-9	0.001	Appendix No.1 to Art.3 Table 4 Protective concentrations
Republic of Bulgaria	DDX(total DDT,DDD and DDE)		0.3	Appendix No.1 to Art.3 Table 4 Protective concentrations
Republic of Bulgaria	DDT	50-29-3	0.3	Appendix No.1 to Art.3 Table 4 Protective concentrations
Republic of Bulgaria	DDE	72-55-9	0.3	Appendix No.1 to Art.3 Table 4 Protective concentrations
Republic of Bulgaria	DDD	72-54-8	0.3	Appendix No.1 to Art.3 Table 4 Protective concentrations
Republic of Bulgaria	2,4 'and 4,4' - Dihlordifenildihloretilen /-o, p'-and p, p'-DDE /		0.1	Appendix No.1 to Art.3 Table 4 Protective concentrations
Republic of Bulgaria	2,4 '-Dihlordifenildihloretilen /-o, p'-DDE /	3424-82-6	0.1	Appendix No.1 to Art.3 Table 4 Protective concentrations
Republic of Bulgaria	4,4'- Dihlordifenildihloretilen/p, p'-DDE /	72-55-9	0.1	Appendix No.1 to Art.3 Table 4 Protective concentrations
Republic of Bulgaria	2,4 'and 4,4'-dichlorodiphenyl-2,dichloromethane / o, p'-and p, p'-DDD /		0.1	Appendix No.1 to Art.3 Table 4 Protective concentrations
Republic of Bulgaria	o, p'-DDD	53-19-0	0.1	Appendix No.1 to Art.3 Table 4 Protective concentrations
Republic of Bulgaria	p, p'-DDD	72-54-8	0.1	Appendix No.1 to Art.3 Table 4 Protective concentrations
Republic of Bulgaria	2,4 'and 4,4'-dichlorodiphenyl-2, 2.2-trichloroethane / o, p 'and p, p'-DDT /		0.1	Appendix No.1 to Art.3 Table 4 Protective concentrations
Republic of Bulgaria	o, p'-DDT	789-02-6	0.1	Appendix No.1 to Art.3 Table 4 Protective concentrations
Republic of Bulgaria	p, p'-DDT	50-29-3	0.1	Appendix No.1 to Art.3 Table 4 Protective concentrations
Republic of Bulgaria	Hexachlorobenzene	118-74-1	0.25	Appendix No.1 to Art.3 Table 4 maximum concentrations
Republic of Bulgaria	alpha-beta-gamma HCH		0.01	Appendix No.1 to Art.3 Table 4 maximum concentrations
Republic of Bulgaria	alpha-HCH	319-84-6	0.01	Appendix No.1 to Art.3 Table 4 maximum concentrations
Republic of Bulgaria	beta-HCH	319-85-7	0.01	Appendix No.1 to Art.3 Table 4 maximum concentrations
Republic of Bulgaria	Lindane	58-89-9	0.01	Appendix No.1 to Art.3 Table 4 maximum concentrations
Republic of Bulgaria	DDX(total DDT,DDD and DDE)		1.5	Appendix No.1 to Art.3 Table 4 maximum concentrations
Republic of Bulgaria	DDT	50-29-3	1.5	Appendix No.1 to Art.3 Table 4 maximum concentrations
Republic of Bulgaria	DDE	72-55-9	1.5	Appendix No.1 to Art.3 Table 4 maximum concentrations
Republic of Bulgaria	DDD	72-54-8	1.5	Appendix No.1 to Art.3 Table 4 maximum concentrations
Republic of Bulgaria	2,4 'and 4,4' - Dihlordifenildihloretilen /-o, p'-and p, p'-DDE /		0.5	Appendix No.1 to Art.3 Table 4 maximum concentrations
Republic of Bulgaria	2,4 '-Dihlordifenildihloretilen /-o, p'-DDE /	3424-82-6	0.5	Appendix No.1 to Art.3 Table 4 maximum concentrations
Republic of Bulgaria	4,4'- Dihlordifenildihloretilen/p, p'-DDE /	72-55-9	0.5	Appendix No.1 to Art.3 Table 4 maximum concentrations
Republic of Bulgaria	2,4 'and 4,4'-dichlorodiphenyl-2,dichloromethane / o, p'-and p, p'-DDD /		0.5	Appendix No.1 to Art.3 Table 4 maximum concentrations
Republic of Bulgaria	o, p'-DDD	53-19-0	0.5	Appendix No.1 to Art.3 Table 4 maximum concentrations
Republic of Bulgaria	p, p'-DDD	72-54-8	0.5	Appendix No.1 to Art.3 Table 4 maximum concentrations
Republic of Bulgaria	2,4 'and 4,4'-dichlorodiphenyl-2, 2.2-trichloroethane / o, p 'and p, p'-DDT /		0.5	Appendix No.1 to Art.3 Table 4 maximum concentrations
Republic of Bulgaria	o, p'-DDT	789-02-6	0.5	Appendix No.1 to Art.3 Table 4 maximum concentrations
Republic of Bulgaria	p, p'-DDT	50-29-3	0.5	Appendix No.1 to Art.3 Table 4 maximum concentrations
Republic of Bulgaria	Aldrin	309-00-2	0.5	Appx B children's playgrounds CV
Republic of Bulgaria	Cyanide (assumed to be Sodium cyanide)	143-33-9	25	Appx B children's playgrounds CV
Republic of Bulgaria	DDT	50-29-3	8	Appx B children's playgrounds CV
Republic of Bulgaria	Epichlorohydrin	106-89-8	1	Appx B children's playgrounds CV
Republic of Bulgaria	HCH (HCH-mix or beta-HCH)		0.5	Appx B children's playgrounds CV
Republic of Bulgaria	HCH-mix	608-73-1	0.5	Appx B children's playgrounds CV
Republic of Bulgaria	beta-HCH	319-85-7	0.5	Appx B children's playgrounds CV
Republic of Bulgaria	Pyridine	110-86-1	3	Appx B children's playgrounds CV
Republic of Bulgaria	Aldrin	309-00-2	2	Appx B children's playgrounds TV
Republic of Bulgaria	Cyanide (assumed to be Sodium cyanide)	143-33-9	50	Appx B children's playgrounds TV
Republic of Bulgaria	DDT	50-29-3	40	Appx B children's playgrounds TV
Republic of Bulgaria	Epichlorohydrin	106-89-8	8	Appx B children's playgrounds TV
Republic of Bulgaria	HCH (HCH-mix or beta-HCH)		5	Appx B children's playgrounds TV
Republic of Bulgaria	HCH-mix	608-73-1	5	Appx B children's playgrounds TV
Republic of Bulgaria	beta-HCH	319-85-7	5	Appx B children's playgrounds TV
Republic of Bulgaria	Pyridine	110-86-1	30	Appx B children's playgrounds TV
Republic of Bulgaria	Aldrin	309-00-2	1	Appx B Residential Districts CV
Republic of Bulgaria	Cyanide (assumed to be Sodium cyanide)	143-33-9	25	Appx B Residential Districts CV
Republic of Bulgaria	DDT	50-29-3	15	Appx B Residential Districts CV
Republic of Bulgaria	Epichlorohydrin	106-89-8	2	Appx B Residential Districts CV
Republic of Bulgaria	HCH (HCH-mix or beta-HCH)		1	Appx B Residential Districts CV
Republic of Bulgaria	HCH-mix	608-73-1	1	Appx B Residential Districts CV
Republic of Bulgaria	beta-HCH	319-85-7	1	Appx B Residential Districts CV
Republic of Bulgaria	Pyridine	110-86-1	6	Appx B Residential Districts CV
Republic of Bulgaria	Aldrin	309-00-2	4	Appx B Residential Districts TV
Republic of Bulgaria	Cyanide (assumed to be Sodium cyanide)	143-33-9	25	Appx B Residential Districts TV
Republic of Bulgaria	DDT	50-29-3	80	Appx B Residential Districts TV
Republic of Bulgaria	Epichlorohydrin	106-89-8	16	Appx B Residential Districts TV
Republic of Bulgaria	HCH (HCH-mix or beta-HCH)		10	Appx B Residential Districts TV
Republic of Bulgaria	HCH-mix	608-73-1	10	Appx B Residential Districts TV
Republic of Bulgaria	beta-HCH	319-85-7	10	Appx B Residential Districts TV
Republic of Bulgaria	Pyridine	110-86-1	60	Appx B Residential Districts TV
14. (Canada) Province of Alberta	Aldicarb	116-06-3	0.041	Tier 1 Remediation Guidelines (Fine sand)
(Canada) Province of Alberta	Aldrin	309-00-2	3.4	Tier 1 Remediation Guidelines (Fine sand)
(Canada) Province of Alberta	Atrazine and metabolites	1912-24-9	0.0088	Tier 1 Remediation Guidelines (Fine sand)
(Canada) Province of Alberta	Azniphos-methyl	86-50-0	0.41	Tier 1 Remediation Guidelines (Fine sand)
(Canada) Province of Alberta	Bendiocarb	22781-23-3	0.14	Tier 1 Remediation Guidelines (Fine sand)
(Canada) Province of Alberta	Bromacil	314-40-9	0.009	Tier 1 Remediation Guidelines (Fine sand)
(Canada) Province of Alberta	Bromoxynil	1689-84-5	0.044	Tier 1 Remediation Guidelines (Fine sand)
(Canada) Province of Alberta	Carbaryl	63-25-2	1.9	Tier 1 Remediation Guidelines (Fine sand)
(Canada) Province of Alberta	Carbofuran	1563-66-2	0.68	Tier 1 Remediation Guidelines (Fine sand)
(Canada) Province of Alberta	Chlorothalonil	1897-45-6	0.0084	Tier 1 Remediation Guidelines (Fine sand)
(Canada) Province of Alberta	Chlorpyrifos	2921-88-2	49	Tier 1 Remediation Guidelines (Fine sand)
(Canada) Province of Alberta	Cyanazine	21725-46-2	0.12	Tier 1 Remediation Guidelines (Fine sand)
(Canada) Province of Alberta	2,4-D	94-75-7	0.43	Tier 1 Remediation Guidelines (Fine sand)
(Canada) Province of Alberta	DDT	50-29-3	0.015	Tier 1 Remediation Guidelines (Fine sand)
(Canada) Province of Alberta	Diazinon	333-41-5	2.2	Tier 1 Remediation Guidelines (Fine sand)
(Canada) Province of Alberta	Dicamba	1918-00-9	0.5	Tier 1 Remediation Guidelines (Fine sand)
(Canada) Province of Alberta	Dichlofop-methyl	51338-27-3	2	Tier 1 Remediation Guidelines (Fine sand)
(Canada) Province of Alberta	Dieldrin	60-57-1	0.011	Tier 1 Remediation Guidelines (Fine sand)
(Canada) Province of Alberta	Dimethoate	60-51-5	0.0058	Tier 1 Remediation Guidelines (Fine sand)
(Canada) Province of Alberta	Dinoseb	88-85-7	2.8	Tier 1 Remediation Guidelines (Fine sand)
(Canada) Province of Alberta	Diquat	85-00-7	11	Tier 1 Remediation Guidelines (Fine sand)
(Canada) Province of Alberta	Diuron	330-54-1	1.9	Tier 1 Remediation Guidelines (Fine sand)
(Canada) Province of Alberta	Endosulfan	115-29-7	0.0013	Tier 1 Remediation Guidelines (Fine sand)
(Canada) Province of Alberta	Endrin	72-20-8	0.075	Tier 1 Remediation Guidelines (Fine sand)
(Canada) Province of Alberta	Glyphosate	1071-83-6	0.054	Tier 1 Remediation Guidelines (Fine sand)
(Canada) Province of Alberta	Heptachlor epoxide	1024-57-3	0.039	Tier 1 Remediation Guidelines (Fine sand)
(Canada) Province of Alberta	Lindane	58-89-9	0.31	Tier 1 Remediation Guidelines (Fine sand)
(Canada) Province of Alberta	Linuron	330-55-2	0.051	Tier 1 Remediation Guidelines (Fine sand)
(Canada) Province of Alberta	Malathion	121-75-5	0.82	Tier 1 Remediation Guidelines (Fine sand)
(Canada) Province of Alberta	MCPA	94-74-6	0.02	Tier 1 Remediation Guidelines (Fine sand)
(Canada) Province of Alberta	Methoxychlor	72-43-5	0.046	Tier 1 Remediation Guidelines (Fine sand)
(Canada) Province of Alberta	Metolachlor	51218-45-2	0.048	Tier 1 Remediation Guidelines (Fine sand)
(Canada) Province of Alberta	Metribuzin	21087-64-9	0.024	Tier 1 Remediation Guidelines (Fine sand)
(Canada) Province of Alberta	Paraquat (as dichloride)	1910-42-5	1.1	Tier 1 Remediation Guidelines (Fine sand)
(Canada) Province of Alberta	Parathion	56-38-2	7.2	Tier 1 Remediation Guidelines (Fine sand)
(Canada) Province of Alberta	Phorate	298-02-2	0.075	Tier 1 Remediation Guidelines (Fine sand)
(Canada) Province of Alberta	Picloram	1918-02-1	0.024	Tier 1 Remediation Guidelines (Fine sand)
(Canada) Province of Alberta	Simazine	122-34-9	0.033	Tier 1 Remediation Guidelines (Fine sand)
(Canada) Province of Alberta	Tebuthiuron	34014-18-1	2.5	Tier 1 Remediation Guidelines (Fine sand)
(Canada) Province of Alberta	Terbufos	13071-79-9	0.08	Tier 1 Remediation Guidelines (Fine sand)
(Canada) Province of Alberta	Toxaphene	8001-35-2	3.3	Tier 1 Remediation Guidelines (Fine sand)
(Canada) Province of Alberta	Triallate	2303-17-5	0.0077	Tier 1 Remediation Guidelines (Fine sand)
(Canada) Province of Alberta	Trifluralin	1582-09-8	0.038	Tier 1 Remediation Guidelines (Fine sand)
(Canada) Province of Alberta	Aldicarb	116-06-3	0.065	Tier 1 Remediation Guidelines (Coarse sand)
(Canada) Province of Alberta	Aldrin	309-00-2	3.4	Tier 1 Remediation Guidelines (Coarse sand)
(Canada) Province of Alberta	Atrazine and metabolites	1912-24-9	0.01	Tier 1 Remediation Guidelines (Coarse sand)
(Canada) Province of Alberta	Azniphos-methyl	86-50-0	0.75	Tier 1 Remediation Guidelines (Coarse sand)
(Canada) Province of Alberta	Bendiocarb	22781-23-3	0.21	Tier 1 Remediation Guidelines (Coarse sand)
(Canada) Province of Alberta	Bromacil	314-40-9	0.009	Tier 1 Remediation Guidelines (Coarse sand)
(Canada) Province of Alberta	Bromoxynil	1689-84-5	0.052	Tier 1 Remediation Guidelines (Coarse sand)
(Canada) Province of Alberta	Carbaryl	63-25-2	3.6	Tier 1 Remediation Guidelines (Coarse sand)
(Canada) Province of Alberta	Carbofuran	1563-66-2	1.2	Tier 1 Remediation Guidelines (Coarse sand)
(Canada) Province of Alberta	Chlorothalonil	1897-45-6	0.01	Tier 1 Remediation Guidelines (Coarse sand)
(Canada) Province of Alberta	Chlorpyrifos	2921-88-2	95	Tier 1 Remediation Guidelines (Coarse sand)
(Canada) Province of Alberta	Cyanazine	21725-46-2	0.21	Tier 1 Remediation Guidelines (Coarse sand)
(Canada) Province of Alberta	2,4-D	94-75-7	0.67	Tier 1 Remediation Guidelines (Coarse sand)
(Canada) Province of Alberta	DDT	50-29-3	0.018	Tier 1 Remediation Guidelines (Coarse sand)
(Canada) Province of Alberta	Diazinon	333-41-5	4.2	Tier 1 Remediation Guidelines (Coarse sand)
(Canada) Province of Alberta	Dicamba	1918-00-9	0.79	Tier 1 Remediation Guidelines (Coarse sand)
(Canada) Province of Alberta	Dichlofop-methyl	51338-27-3	2.4	Tier 1 Remediation Guidelines (Coarse sand)
(Canada) Province of Alberta	Dieldrin	60-57-1	0.014	Tier 1 Remediation Guidelines (Coarse sand)
(Canada) Province of Alberta	Dimethoate	60-51-5	0.0055	Tier 1 Remediation Guidelines (Coarse sand)
(Canada) Province of Alberta	Dinoseb	88-85-7	5.5	Tier 1 Remediation Guidelines (Coarse sand)
(Canada) Province of Alberta	Diquat	85-00-7	21	Tier 1 Remediation Guidelines (Coarse sand)
(Canada) Province of Alberta	Diuron	330-54-1	3.5	Tier 1 Remediation Guidelines (Coarse sand)
(Canada) Province of Alberta	Endosulfan	115-29-7	0.0015	Tier 1 Remediation Guidelines (Coarse sand)
(Canada) Province of Alberta	Endrin	72-20-8	0.09	Tier 1 Remediation Guidelines (Coarse sand)
(Canada) Province of Alberta	Glyphosate	1071-83-6	0.049	Tier 1 Remediation Guidelines (Coarse sand)
(Canada) Province of Alberta	Heptachlor epoxide	1024-57-3	0.01	Tier 1 Remediation Guidelines (Coarse sand)
(Canada) Province of Alberta	Lindane	58-89-9	0.6	Tier 1 Remediation Guidelines (Coarse sand)
(Canada) Province of Alberta	Linuron	330-55-2	0.059	Tier 1 Remediation Guidelines (Coarse sand)
(Canada) Province of Alberta	Malathion	121-75-5	1.3	Tier 1 Remediation Guidelines (Coarse sand)
(Canada) Province of Alberta	MCPA	94-74-6	0.032	Tier 1 Remediation Guidelines (Coarse sand)
(Canada) Province of Alberta	Methoxychlor	72-43-5	0.056	Tier 1 Remediation Guidelines (Coarse sand)
(Canada) Province of Alberta	Metolachlor	51218-45-2	0.055	Tier 1 Remediation Guidelines (Coarse sand)
(Canada) Province of Alberta	Metribuzin	21087-64-9	0.028	Tier 1 Remediation Guidelines (Coarse sand)
(Canada) Province of Alberta	Paraquat (as dichloride)	1910-42-5	2.2	Tier 1 Remediation Guidelines (Coarse sand)
(Canada) Province of Alberta	Parathion	56-38-2	14	Tier 1 Remediation Guidelines (Coarse sand)
(Canada) Province of Alberta	Phorate	298-02-2	0.14	Tier 1 Remediation Guidelines (Coarse sand)
(Canada) Province of Alberta	Picloram	1918-02-1	0.022	Tier 1 Remediation Guidelines (Coarse sand)
(Canada) Province of Alberta	Simazine	122-34-9	0.038	Tier 1 Remediation Guidelines (Coarse sand)
(Canada) Province of Alberta	Tebuthiuron	34014-18-1	3.7	Tier 1 Remediation Guidelines (Coarse sand)
(Canada) Province of Alberta	Terbufos	13071-79-9	0.15	Tier 1 Remediation Guidelines (Coarse sand)
(Canada) Province of Alberta	Toxaphene	8001-35-2	4.8	Tier 1 Remediation Guidelines (Coarse sand)
(Canada) Province of Alberta	Triallate	2303-17-5	0.0092	Tier 1 Remediation Guidelines (Coarse sand)
(Canada) Province of Alberta	Trifluralin	1582-09-8	0.045	Tier 1 Remediation Guidelines (Coarse sand)
(Canada) Provience of Manitoba	Chlordane alpha-Chlordane beta-Chlordane		0.0045	CCME Lowest Soil/Sediment Criterion
(Canada) Provience of Manitoba	Chlordane	57-74-9	0.0045	CCME Lowest Soil/Sediment Criterion
(Canada) Provience of Manitoba	alpha-Chlordane	5103-71-9	0.0045	CCME Lowest Soil/Sediment Criterion
(Canada) Provience of Manitoba	beta-Chlordane	5103-74-2	0.0045	CCME Lowest Soil/Sediment Criterion
(Canada) Provience of Manitoba	Dichloro diphenyl dichloroethane, 2,2-Bis (pchlorophenyl)-1,1-dichloroethane	72-54-8	0.00122	CCME Lowest Soil/Sediment Criterion
(Canada) Provience of Manitoba	Dichloro diphenyl ethylene, 1,1-Dichloro-2,2-bis(pchlorophenyl)-ethene	72-55-9	0.00207	CCME Lowest Soil/Sediment Criterion
(Canada) Provience of Manitoba	Dichloro diphenyl trichloroethane; 2,2-Bis(pchlorophenyl)-1,1,1-trichloroethane	50-29-3	0.00119	CCME Lowest Soil/Sediment Criterion
(Canada) Provience of Manitoba	Dieldrin	60-57-1	0.00071	CCME Lowest Soil/Sediment Criterion
(Canada) Provience of Manitoba	Endosulphan		0.00267	CCME Lowest Soil/Sediment Criterion
(Canada) Provience of Manitoba	Endosulphan	115-29-7	0.00267	CCME Lowest Soil/Sediment Criterion
(Canada) Provience of Manitoba	Endosulphan	195-59-6	0.00267	CCME Lowest Soil/Sediment Criterion
(Canada) Provience of Manitoba	Endosulphan	33213-65-9	0.00267	CCME Lowest Soil/Sediment Criterion
(Canada) Provience of Manitoba	Heptachlor epoxide	1024-57-3	0.0006	CCME Lowest Soil/Sediment Criterion
(Canada) Provience of Manitoba	Hexachlorocyclohexane, gamma- (γ-HCH, Lindane, γ-BHC)	58-89-9	0.00032	CCME Lowest Soil/Sediment Criterion
(Canada) Provience of Manitoba	DDT (total)		0.7	Soil Quality Guidelines
(Canada) Provience of Manitoba	DDT, o,p	789-02-6	0.7	Soil Quality Guidelines
(Canada) Provience of Manitoba	DDT, p,p	50-29-3	0.7	Soil Quality Guidelines
Canada Northwest Territories	DDT (total)		0.7
Canada Northwest Territories	DDT, o,p	789-02-6	0.7
Canada Northwest Territories	DDT, p,p	50-29-3	0.7
Canada Nova Scotia	Aldicarb	116-06-3	0.041	Table 1A Tier 1 Fine sand
Canada Nova Scotia	Aldrin	309-00-2	3.4	Table 1A Tier 1 Fine sand
Canada Nova Scotia	Atrazine and metabolites	1912-24-9	0.0088	Table 1A Tier 1 Fine sand
Canada Nova Scotia	Azniphos-methyl	86-50-0	0.41	Table 1A Tier 1 Fine sand
Canada Nova Scotia	Bendiocarb	22781-23-3	0.14	Table 1A Tier 1 Fine sand
Canada Nova Scotia	Bromacil	314-40-9	0.009	Table 1A Tier 1 Fine sand
Canada Nova Scotia	Bromoxynil	1689-84-5	0.044	Table 1A Tier 1 Fine sand
Canada Nova Scotia	Carbaryl	63-25-2	1.9	Table 1A Tier 1 Fine sand
Canada Nova Scotia	Carbofuran	1563-66-2	0.68	Table 1A Tier 1 Fine sand
Canada Nova Scotia	Chlorothalonil	1897-45-6	0.0084	Table 1A Tier 1 Fine sand
Canada Nova Scotia	Chlorpyrifos	2921-88-2	49	Table 1A Tier 1 Fine sand
Canada Nova Scotia	Cyanazine	21725-46-2	0.12	Table 1A Tier 1 Fine sand
Canada Nova Scotia	2,4-D	94-75-7	0.43	Table 1A Tier 1 Fine sand
Canada Nova Scotia	DDT	50-29-3	0.015	Table 1A Tier 1 Fine sand
Canada Nova Scotia	Diazinon	333-41-5	2.2	Table 1A Tier 1 Fine sand
Canada Nova Scotia	Dicamba	1918-00-9	0.5	Table 1A Tier 1 Fine sand
Canada Nova Scotia	Dichlofop-methyl	51338-27-3	2	Table 1A Tier 1 Fine sand
Canada Nova Scotia	Dieldrin	60-57-1	0.011	Table 1A Tier 1 Fine sand
Canada Nova Scotia	Dimethoate	60-51-5	0.0058	Table 1A Tier 1 Fine sand
Canada Nova Scotia	Dinoseb	88-85-7	2.8	Table 1A Tier 1 Fine sand
Canada Nova Scotia	Diquat	85-00-7	11	Table 1A Tier 1 Fine sand
Canada Nova Scotia	Diuron	330-54-1	1.9	Table 1A Tier 1 Fine sand
Canada Nova Scotia	Endosulfan	115-29-7	0.0013	Table 1A Tier 1 Fine sand
Canada Nova Scotia	Endrin	72-20-8	0.075	Table 1A Tier 1 Fine sand
Canada Nova Scotia	Glyphosate	1071-83-6	0.054	Table 1A Tier 1 Fine sand
Canada Nova Scotia	Heptachlor epoxide	1024-57-3	0.039	Table 1A Tier 1 Fine sand
Canada Nova Scotia	Lindane	58-89-9	0.31	Table 1A Tier 1 Fine sand
Canada Nova Scotia	Linuron	330-55-2	0.051	Table 1A Tier 1 Fine sand
Canada Nova Scotia	Malathion	121-75-5	0.82	Table 1A Tier 1 Fine sand
Canada Nova Scotia	MCPA	94-74-6	0.02	Table 1A Tier 1 Fine sand
Canada Nova Scotia	Methoxychlor	72-43-5	0.046	Table 1A Tier 1 Fine sand
Canada Nova Scotia	Metolachlor	51218-45-2	0.048	Table 1A Tier 1 Fine sand
Canada Nova Scotia	Metribuzin	21087-64-9	0.024	Table 1A Tier 1 Fine sand
Canada Nova Scotia	Paraquat (as dichloride)	1910-42-5	1.1	Table 1A Tier 1 Fine sand
Canada Nova Scotia	Parathion	56-38-2	7.2	Table 1A Tier 1 Fine sand
Canada Nova Scotia	Phorate	298-02-2	0.075	Table 1A Tier 1 Fine sand
Canada Nova Scotia	Picloram	1918-02-1	0.024	Table 1A Tier 1 Fine sand
Canada Nova Scotia	Simazine	122-34-9	0.033	Table 1A Tier 1 Fine sand
Canada Nova Scotia	Tebuthiuron	34014-18-1	2.5	Table 1A Tier 1 Fine sand
Canada Nova Scotia	Terbufos	13071-79-9	0.08	Table 1A Tier 1 Fine sand
Canada Nova Scotia	Toxaphene	8001-35-2	3.3	Table 1A Tier 1 Fine sand
Canada Nova Scotia	Triallate	2303-17-5	0.0077	Table 1A Tier 1 Fine sand
Canada Nova Scotia	Trifluralin	1582-09-8	0.038	Table 1A Tier 1 Fine sand
Canada Nova Scotia	Aldicarb	116-06-3	0.065	Table 1A Tier 1 Coarse sand
Canada Nova Scotia	Aldrin	309-00-2	3.4	Table 1A Tier 1 Coarse sand
Canada Nova Scotia	Atrazine and metabolites	1912-24-9	0.01	Table 1A Tier 1 Coarse sand
Canada Nova Scotia	Azniphos-methyl	86-50-0	0.75	Table 1A Tier 1 Coarse sand
Canada Nova Scotia	Bendiocarb	22781-23-3	0.21	Table 1A Tier 1 Coarse sand
Canada Nova Scotia	Bromacil	314-40-9	0.009	Table 1A Tier 1 Coarse sand
Canada Nova Scotia	Bromoxynil	1689-84-5	0.052	Table 1A Tier 1 Coarse sand
Canada Nova Scotia	Carbaryl	63-25-2	3.6	Table 1A Tier 1 Coarse sand
Canada Nova Scotia	Carbofuran	1563-66-2	1.2	Table 1A Tier 1 Coarse sand
Canada Nova Scotia	Chlorothalonil	1897-45-6	0.01	Table 1A Tier 1 Coarse sand
Canada Nova Scotia	Chlorpyrifos	2921-88-2	95	Table 1A Tier 1 Coarse sand
Canada Nova Scotia	Cyanazine	21725-46-2	0.21	Table 1A Tier 1 Coarse sand
Canada Nova Scotia	2,4-D	94-75-7	0.67	Table 1A Tier 1 Coarse sand
Canada Nova Scotia	DDT	50-29-3	0.018	Table 1A Tier 1 Coarse sand
Canada Nova Scotia	Diazinon	333-41-5	4.2	Table 1A Tier 1 Coarse sand
Canada Nova Scotia	Dicamba	1918-00-9	0.79	Table 1A Tier 1 Coarse sand
Canada Nova Scotia	Dichlofop-methyl	51338-27-3	2.4	Table 1A Tier 1 Coarse sand
Canada Nova Scotia	Dieldrin	60-57-1	0.014	Table 1A Tier 1 Coarse sand
Canada Nova Scotia	Dimethoate	60-51-5	0.0055	Table 1A Tier 1 Coarse sand
Canada Nova Scotia	Dinoseb	88-85-7	5.5	Table 1A Tier 1 Coarse sand
Canada Nova Scotia	Diquat	85-00-7	21	Table 1A Tier 1 Coarse sand
Canada Nova Scotia	Diuron	330-54-1	3.5	Table 1A Tier 1 Coarse sand
Canada Nova Scotia	Endosulfan	115-29-7	0.0015	Table 1A Tier 1 Coarse sand
Canada Nova Scotia	Endrin	72-20-8	0.09	Table 1A Tier 1 Coarse sand
Canada Nova Scotia	Glyphosate	1071-83-6	0.049	Table 1A Tier 1 Coarse sand
Canada Nova Scotia	Heptachlor epoxide	1024-57-3	0.01	Table 1A Tier 1 Coarse sand
Canada Nova Scotia	Lindane	58-89-9	0.6	Table 1A Tier 1 Coarse sand
Canada Nova Scotia	Linuron	330-55-2	0.059	Table 1A Tier 1 Coarse sand
Canada Nova Scotia	Malathion	121-75-5	1.3	Table 1A Tier 1 Coarse sand
Canada Nova Scotia	MCPA	94-74-6	0.032	Table 1A Tier 1 Coarse sand
Canada Nova Scotia	Methoxychlor	72-43-5	0.056	Table 1A Tier 1 Coarse sand
Canada Nova Scotia	Metolachlor	51218-45-2	0.055	Table 1A Tier 1 Coarse sand
Canada Nova Scotia	Metribuzin	21087-64-9	0.028	Table 1A Tier 1 Coarse sand
Canada Nova Scotia	Paraquat (as dichloride)	1910-42-5	2.2	Table 1A Tier 1 Coarse sand
Canada Nova Scotia	Parathion	56-38-2	14	Table 1A Tier 1 Coarse sand
Canada Nova Scotia	Phorate	298-02-2	0.14	Table 1A Tier 1 Coarse sand
Canada Nova Scotia	Picloram	1918-02-1	0.022	Table 1A Tier 1 Coarse sand
Canada Nova Scotia	Simazine	122-34-9	0.038	Table 1A Tier 1 Coarse sand
Canada Nova Scotia	Tebuthiuron	34014-18-1	3.7	Table 1A Tier 1 Coarse sand
Canada Nova Scotia	Terbufos	13071-79-9	0.15	Table 1A Tier 1 Coarse sand
Canada Nova Scotia	Toxaphene	8001-35-2	4.8	Table 1A Tier 1 Coarse sand
Canada Nova Scotia	Triallate	2303-17-5	0.0092	Table 1A Tier 1 Coarse sand
Canada Nova Scotia	Trifluralin	1582-09-8	0.045	Table 1A Tier 1 Coarse sand
Canada Nova Scotia	Aldicarb	116-06-3	22	Table 1B Tier 1 Fine sand
Canada Nova Scotia	Aldrin	309-00-2	3.4	Table 1B Tier 1 Fine sand
Canada Nova Scotia	Atrazine	1912-24-9	11	Table 1B Tier 1 Fine sand
Canada Nova Scotia	Azniphos-methyl	86-50-0	55	Table 1B Tier 1 Fine sand
Canada Nova Scotia	Bendiocarb	22781-23-3	89	Table 1B Tier 1 Fine sand
Canada Nova Scotia	Bromoxynil	1689-84-5	11	Table 1B Tier 1 Fine sand
Canada Nova Scotia	Carbaryl	63-25-2	220	Table 1B Tier 1 Fine sand
Canada Nova Scotia	Carbofuran	1563-66-2	220	Table 1B Tier 1 Fine sand
Canada Nova Scotia	Chlorothalonil	1897-45-6	320	Table 1B Tier 1 Fine sand
Canada Nova Scotia	Chlorpyrifos	2921-88-2	20	Table 1B Tier 1 Fine sand
Canada Nova Scotia	Cyanazine	21725-46-2	29	Table 1B Tier 1 Fine sand
Canada Nova Scotia	2,4-D	94-75-7	220	Table 1B Tier 1 Fine sand
Canada Nova Scotia	DDT	50-29-3	220	Table 1B Tier 1 Fine sand
Canada Nova Scotia	Diazinon	333-41-5	44	Table 1B Tier 1 Fine sand
Canada Nova Scotia	Dicamba	1918-00-9	280	Table 1B Tier 1 Fine sand
Canada Nova Scotia	Dichlofop-methyl	51338-27-3	22	Table 1B Tier 1 Fine sand
Canada Nova Scotia	Dieldrin	60-57-1	3.4	Table 1B Tier 1 Fine sand
Canada Nova Scotia	Dimethoate	60-51-5	44	Table 1B Tier 1 Fine sand
Canada Nova Scotia	Dinoseb	88-85-7	22	Table 1B Tier 1 Fine sand
Canada Nova Scotia	Diquat	85-00-7	180	Table 1B Tier 1 Fine sand
Canada Nova Scotia	Diuron	330-54-1	350	Table 1B Tier 1 Fine sand
Canada Nova Scotia	Endosulfan	115-29-7	210	Table 1B Tier 1 Fine sand
Canada Nova Scotia	Endrin	72-20-8	10	Table 1B Tier 1 Fine sand
Canada Nova Scotia	Glyphosate	1071-83-6	670	Table 1B Tier 1 Fine sand
Canada Nova Scotia	Heptachlor	76-44-8	0.31	Table 1B Tier 1 Fine sand
Canada Nova Scotia	Lindane	58-89-9	6.7	Table 1B Tier 1 Fine sand
Canada Nova Scotia	Linuron	330-55-2	44	Table 1B Tier 1 Fine sand
Canada Nova Scotia	Malathion	121-75-5	440	Table 1B Tier 1 Fine sand
Canada Nova Scotia	MCPA	94-74-6	11	Table 1B Tier 1 Fine sand
Canada Nova Scotia	Methoxychlor	72-43-5	3500	Table 1B Tier 1 Fine sand
Canada Nova Scotia	Metolachlor	51218-45-2	110	Table 1B Tier 1 Fine sand
Canada Nova Scotia	Metribuzin	21087-64-9	180	Table 1B Tier 1 Fine sand
Canada Nova Scotia	Paraquat	4685-14-7	22	Table 1B Tier 1 Fine sand
Canada Nova Scotia	Parathion	56-38-2	110	Table 1B Tier 1 Fine sand
Canada Nova Scotia	Phorate	298-02-2	4.4	Table 1B Tier 1 Fine sand
Canada Nova Scotia	Picloram	1918-02-1	440	Table 1B Tier 1 Fine sand
Canada Nova Scotia	Simazine	122-34-9	29	Table 1B Tier 1 Fine sand
Canada Nova Scotia	Tebuthiuron	34014-18-1	1600	Table 1B Tier 1 Fine sand
Canada Nova Scotia	Terbufos	13071-79-9	1.1	Table 1B Tier 1 Fine sand
Canada Nova Scotia	Toxaphene	8001-35-2	4.8	Table 1B Tier 1 Fine sand
Canada Nova Scotia	Triallate	2303-17-5	290	Table 1B Tier 1 Fine sand
Canada Nova Scotia	Trifluralin	1582-09-8	110	Table 1B Tier 1 Fine sand
Canada Nova Scotia	Aldicarb	116-06-3	22	Table 1B Tier 1 coarse sand
Canada Nova Scotia	Aldrin	309-00-2	3.4	Table 1B Tier 1 coarse sand
Canada Nova Scotia	Atrazine	1912-24-9	11	Table 1B Tier 1 coarse sand
Canada Nova Scotia	Azniphos-methyl	86-50-0	55	Table 1B Tier 1 coarse sand
Canada Nova Scotia	Bendiocarb	22781-23-3	89	Table 1B Tier 1 coarse sand
Canada Nova Scotia	Bromoxynil	1689-84-5	11	Table 1B Tier 1 coarse sand
Canada Nova Scotia	Carbaryl	63-25-2	220	Table 1B Tier 1 coarse sand
Canada Nova Scotia	Carbofuran	1563-66-2	220	Table 1B Tier 1 coarse sand
Canada Nova Scotia	Chlorothalonil	1897-45-6	320	Table 1B Tier 1 coarse sand
Canada Nova Scotia	Chlorpyrifos	2921-88-2	20	Table 1B Tier 1 coarse sand
Canada Nova Scotia	Cyanazine	21725-46-2	29	Table 1B Tier 1 coarse sand
Canada Nova Scotia	2,4-D	94-75-7	220	Table 1B Tier 1 coarse sand
Canada Nova Scotia	DDT	50-29-3	220	Table 1B Tier 1 coarse sand
Canada Nova Scotia	Diazinon	333-41-5	44	Table 1B Tier 1 coarse sand
Canada Nova Scotia	Dicamba	1918-00-9	280	Table 1B Tier 1 coarse sand
Canada Nova Scotia	Dichlofop-methyl	51338-27-3	22	Table 1B Tier 1 coarse sand
Canada Nova Scotia	Dieldrin	60-57-1	3.4	Table 1B Tier 1 coarse sand
Canada Nova Scotia	Dimethoate	60-51-5	44	Table 1B Tier 1 coarse sand
Canada Nova Scotia	Dinoseb	88-85-7	22	Table 1B Tier 1 coarse sand
Canada Nova Scotia	Diquat	85-00-7	180	Table 1B Tier 1 coarse sand
Canada Nova Scotia	Diuron	330-54-1	350	Table 1B Tier 1 coarse sand
Canada Nova Scotia	Endosulfan	115-29-7	210	Table 1B Tier 1 coarse sand
Canada Nova Scotia	Endrin	72-20-8	10	Table 1B Tier 1 coarse sand
Canada Nova Scotia	Glyphosate	1071-83-6	670	Table 1B Tier 1 coarse sand
Canada Nova Scotia	Heptachlor	76-44-8	0.31	Table 1B Tier 1 coarse sand
Canada Nova Scotia	Lindane	58-89-9	6.7	Table 1B Tier 1 coarse sand
Canada Nova Scotia	Linuron	330-55-2	44	Table 1B Tier 1 coarse sand
Canada Nova Scotia	Malathion	121-75-5	440	Table 1B Tier 1 coarse sand
Canada Nova Scotia	MCPA	94-74-6	11	Table 1B Tier 1 coarse sand
Canada Nova Scotia	Methoxychlor	72-43-5	3500	Table 1B Tier 1 coarse sand
Canada Nova Scotia	Metolachlor	51218-45-2	110	Table 1B Tier 1 coarse sand
Canada Nova Scotia	Metribuzin	21087-64-9	180	Table 1B Tier 1 coarse sand
Canada Nova Scotia	Paraquat	4685-14-7	22	Table 1B Tier 1 coarse sand
Canada Nova Scotia	Parathion	56-38-2	110	Table 1B Tier 1 coarse sand
Canada Nova Scotia	Phorate	298-02-2	4.4	Table 1B Tier 1 coarse sand
Canada Nova Scotia	Picloram	1918-02-1	440	Table 1B Tier 1 coarse sand
Canada Nova Scotia	Simazine	122-34-9	29	Table 1B Tier 1 coarse sand
Canada Nova Scotia	Tebuthiuron	34014-18-1	1600	Table 1B Tier 1 coarse sand
Canada Nova Scotia	Terbufos	13071-79-9	1.1	Table 1B Tier 1 coarse sand
Canada Nova Scotia	Toxaphene	8001-35-2	4.8	Table 1B Tier 1 coarse sand
Canada Nova Scotia	Triallate	2303-17-5	290	Table 1B Tier 1 coarse sand
Canada Nova Scotia	Trifluralin	1582-09-8	110	Table 1B Tier 1 coarse sand
Canada (CCME)	Chlordane alpha-Chlordane beta-Chlordane		0.0045	CCME Lowest Soil/Sediment Criterion
Canada (CCME)	Chlordane	57-74-9	0.0045	CCME Lowest Soil/Sediment Criterion
Canada (CCME)	alpha-Chlordane	5103-71-9	0.0045	CCME Lowest Soil/Sediment Criterion
Canada (CCME)	beta-Chlordane	5103-74-2	0.0045	CCME Lowest Soil/Sediment Criterion
Canada (CCME)	Dichloro diphenyl dichloroethane, 2,2-Bis (pchlorophenyl)-1,1-dichloroethane	72-54-8	0.00122	CCME Lowest Soil/Sediment Criterion
Canada (CCME)	Dichloro diphenyl ethylene, 1,1-Dichloro-2,2-bis(pchlorophenyl)-ethene	72-55-9	0.00207	CCME Lowest Soil/Sediment Criterion
Canada (CCME)	Dichloro diphenyl trichloroethane; 2,2-Bis(pchlorophenyl)-1,1,1-trichloroethane	50-29-3	0.00119	CCME Lowest Soil/Sediment Criterion
Canada (CCME)	Dieldrin	60-57-1	0.00071	CCME Lowest Soil/Sediment Criterion
Canada (CCME)	Endosulphan		0.00267	CCME Lowest Soil/Sediment Criterion
Canada (CCME)	Endosulphan	115-29-7	0.00267	CCME Lowest Soil/Sediment Criterion
Canada (CCME)	Endosulphan	195-59-6	0.00267	CCME Lowest Soil/Sediment Criterion
Canada (CCME)	Endosulphan	33213-65-9	0.00267	CCME Lowest Soil/Sediment Criterion
Canada (CCME)	Heptachlor epoxide	1024-57-3	0.0006	CCME Lowest Soil/Sediment Criterion
Canada (CCME)	Hexachlorocyclohexane, gamma- (γ-HCH, Lindane, γ-BHC)	58-89-9	0.00032	CCME Lowest Soil/Sediment Criterion
Canada (CCME)	Dichloro diphenyl trichloroethane; 2,2-Bis(pchlorophenyl)-1,1,1-trichloroethane DDT (total)		0.7	Soil Quality Guidelines
Canada (CCME)	2,2-Bis(pchlorophenyl)-1,1,1-trichloroethane	50-29-3	0.7	Soil Quality Guidelines
Canada (CCME)	DDT, o,p	789-02-6	0.7	Soil Quality Guidelines
(Canada) Province of British Columbia	DDT (Standards are for the sum of DDT and DDT metabolites)		0.015	Schedule 5
(Canada) Province of British Columbia	DDD, p,p	72-54-8	0.015	Schedule 5
(Canada) Province of British Columbia	DDE	72-55-9	0.015	Schedule 5
(Canada) Province of British Columbia	DDT, o,p	789-02-6	0.015	Schedule 5
(Canada) Province of British Columbia	DDT, p,p	50-29-3	0.015	Schedule 5
(Canada) Province of British Columbia	Pentachlorophenol	87-86-5	0.1	Schedule 5
(Canada) Province of British Columbia	DDT(Includes DDT metabolites)		0.01	Schedule 7
(Canada) Province of British Columbia	DDD, p,p	72-54-8	0.01	Schedule 7
(Canada) Province of British Columbia	DDE	72-55-9	0.01	Schedule 7
(Canada) Province of British Columbia	DDT, o,p	789-02-6	0.01	Schedule 7
(Canada) Province of British Columbia	DDT, p,p	50-29-3	0.01	Schedule 7
(Canada) Province of British Columbia	alachlor	15972-60-8	0.06	Schedule 10
(Canada) Province of British Columbia	aldicarb	116-06-3	0.061	Schedule 10
(Canada) Province of British Columbia	aldrin	309-00-2	0.00029	Schedule 10
(Canada) Province of British Columbia	amdro (hydramethylnon)	67485-29-4	0.018	Schedule 10
(Canada) Province of British Columbia	ametryn	834-12-8	0.55	Schedule 10
(Canada) Province of British Columbia	3-amino-2,5-dichlorobenzoic acid (chloramben)	133-90-4	0.92	Schedule 10
(Canada) Province of British Columbia	amitraz	33089-61-1	0.15	Schedule 10
(Canada) Province of British Columbia	apollo (clofentezine)	74115-24-5	0.79	Schedule 10
(Canada) Province of British Columbia	aramite	140-57-8	0.19	Schedule 10
(Canada) Province of British Columbia	assure (quizalofop)	76578-12-6	0.55	Schedule 10
(Canada) Province of British Columbia	asulam	3337-71-1	3.1	Schedule 10
(Canada) Province of British Columbia	atrazine	1912-24-9	0.022	Schedule 10
(Canada) Province of British Columbia	avenge (difenzoquat)	43222-48-6	4.9	Schedule 10
(Canada) Province of British Columbia	avermectin B1	71751-41-2	0.024	Schedule 10
(Canada) Province of British Columbia	baygon (propoxur)	114-26-1	0.24	Schedule 10
(Canada) Province of British Columbia	bayleton (triadimefon)	43121-43-3	1.8	Schedule 10
(Canada) Province of British Columbia	baythroid (cyfluthrin)	68359-37-5	1.5	Schedule 10
(Canada) Province of British Columbia	benefin (benfluralin)	1861-40-1	18	Schedule 10
(Canada) Province of British Columbia	benlate (benomyl)	17804-35-2	3.1	Schedule 10
(Canada) Province of British Columbia	bensulfuron-methyl (londax)	83055-99-6	12	Schedule 10
(Canada) Province of British Columbia	bentazon	25057-89-0	1.8	Schedule 10
(Canada) Province of British Columbia	bidrin (dicrotophos)	141-66-2	0.0061	Schedule 10
(Canada) Province of British Columbia	biphenthrin (talstar)	82657-04-3	0.92	Schedule 10
(Canada) Province of British Columbia	bromophos	2104-96-3	0.31	Schedule 10
(Canada) Province of British Columbia	bromoxynil	1689-84-5	1.2	Schedule 10
(Canada) Province of British Columbia	bromoxynil octanoate	1689-99-2	1.2	Schedule 10
(Canada) Province of British Columbia	captafol	2425-01-1	0.57	Schedule 10
(Canada) Province of British Columbia	captan	133-06-2	1.4	Schedule 10
(Canada) Province of British Columbia	carbaryl	63-25-2	6.1	Schedule 10
(Canada) Province of British Columbia	carbofuran	1563-66-2	0.31	Schedule 10
(Canada) Province of British Columbia	carbosulfan	55285-14-8	0.61	Schedule 10
(Canada) Province of British Columbia	carboxin	5234-68-4	6.1	Schedule 10
(Canada) Province of British Columbia	chloramben (3-amino-2,5-dichlorobenzoic acid)	133-90-4	0.92	Schedule 10
(Canada) Province of British Columbia	chloranil	118-75-2	0.012	Schedule 10
(Canada) Province of British Columbia	chlordane	12789-03-6	0.016	Schedule 10
(Canada) Province of British Columbia	chlordecone (kepone)	143-50-0	0.00061	Schedule 10
(Canada) Province of British Columbia	chlorimuron-ethyl	90982-32-4	1.2	Schedule 10
(Canada) Province of British Columbia	chlorobenzilate	510-15-6	0.018	Schedule 10
(Canada) Province of British Columbia	chlorothalonil	1897-45-6	0.44	Schedule 10
(Canada) Province of British Columbia	chlorpropham	101-21-3	12	Schedule 10
(Canada) Province of British Columbia	chlorpyrifos	2921-88-2	0.18	Schedule 10
(Canada) Province of British Columbia	chlorpyrifos-methyl	5598-13-0	0.61	Schedule 10
(Canada) Province of British Columbia	chlorsulfuron	64902-72-3	3.1	Schedule 10
(Canada) Province of British Columbia	chlorthal-dimethyl (dacthal)	1861-32-1	1.5	Schedule 10
(Canada) Province of British Columbia	chlorthiophos	60238-56-4	0.049	Schedule 10
(Canada) Province of British Columbia	crotonaldehyde	123-73-9	5.3e-05	Schedule 10
(Canada) Province of British Columbia	cyanazine	21725-46-2	0.0058	Schedule 10
(Canada) Province of British Columbia	cyhalothrin (karate)	68085-85-8	0.31	Schedule 10
(Canada) Province of British Columbia	cypermethrin	52315-07-8	0.61	Schedule 10
(Canada) Province of British Columbia	cyromazine	66215-27-8	0.46	Schedule 10
(Canada) Province of British Columbia	2,4-D (2,4-dichlorophenoxyacetic acid)	94-75-7	0.69	Schedule 10
(Canada) Province of British Columbia	dalapon (2,2-dichloropropionic acid)	75-99-0	1.8	Schedule 10
(Canada) Province of British Columbia	danitol (fenpropathrin)	39515-41-8	1.5	Schedule 10
(Canada) Province of British Columbia	2,4-DB (4-(2,4-dichlorophenoxy)butyric acid)	94-82-6	0.49	Schedule 10
(Canada) Province of British Columbia	DDVP (dichlorovos)	62-73-7	0.017	Schedule 10
(Canada) Province of British Columbia	demeton	8065-48-3	0.0024	Schedule 10
(Canada) Province of British Columbia	diallate	2303-16-4	0.08	Schedule 10
(Canada) Province of British Columbia	diazinon	333-41-5	0.055	Schedule 10
(Canada) Province of British Columbia	dicamba	1918-00-9	1.8	Schedule 10
(Canada) Province of British Columbia	dichlorodifluoromethane (Freon 12)	75-71-8	0.094	Schedule 10
(Canada) Province of British Columbia	dieldrin	60-57-1	0.0003	Schedule 10
(Canada) Province of British Columbia	diflubenzuron	35367-38-5	1.2	Schedule 10
(Canada) Province of British Columbia	dimethipin	55290-64-7	1.2	Schedule 10
(Canada) Province of British Columbia	dimethoate	60-51-5	0.012	Schedule 10
(Canada) Province of British Columbia	1,1-dimethyl-4,4'-bipyridinium cation (paraquat)	4685-14-7	0.27	Schedule 10
(Canada) Province of British Columbia	dimethyl-1,2-dibromo-2,2-dichloroethylphosphate (naled)	300-76-5	0.12	Schedule 10
(Canada) Province of British Columbia	dimethyl phthalate	131-11-3	100	Schedule 10
(Canada) Province of British Columbia	dinoseb	88-85-7	0.061	Schedule 10
(Canada) Province of British Columbia	diphenamid	957-51-7	1.8	Schedule 10
(Canada) Province of British Columbia	diphenylamine	122-39-4	1.5	Schedule 10
(Canada) Province of British Columbia	diquat	85-00-7	0.13	Schedule 10
(Canada) Province of British Columbia	disulfoton	298-04-4	0.0024	Schedule 10
(Canada) Province of British Columbia	diuron	330-54-1	0.12	Schedule 10
(Canada) Province of British Columbia	dodine	2439-10-3	0.24	Schedule 10
(Canada) Province of British Columbia	dual (metolachlor)	51218-45-2	9.2	Schedule 10
(Canada) Province of British Columbia	endosulfan	115-29-7	0.37	Schedule 10
(Canada) Province of British Columbia	endothall	145-73-3	1.2	Schedule 10
(Canada) Province of British Columbia	endrin	72-20-8	0.018	Schedule 10
(Canada) Province of British Columbia	epichlorohydrin (chloromethyl-ethylene oxide)	106-89-8	0.0076	Schedule 10
(Canada) Province of British Columbia	EPN (ethyl p-nitrophenyl phenylphosphorothioate)	2104-64-5	0.00061	Schedule 10
(Canada) Province of British Columbia	EPTC (s-ethyl dipropylthiocarbamate)	759-94-4	1.5	Schedule 10
(Canada) Province of British Columbia	ethion	563-12-2	0.031	Schedule 10
(Canada) Province of British Columbia	express (tribenuron methyl)	101200-48-0	0.49	Schedule 10
(Canada) Province of British Columbia	fenamiphos	22224-92-6	0.015	Schedule 10
(Canada) Province of British Columbia	fenchlorphos (ronnel)	299-84-3	3.1	Schedule 10
(Canada) Province of British Columbia	fenvalerate (pydrin)	51630-58-1	1.5	Schedule 10
(Canada) Province of British Columbia	fluometuron	2164-17-2	0.79	Schedule 10
(Canada) Province of British Columbia	fluridone	59756-60-4	4.9	Schedule 10
(Canada) Province of British Columbia	flusilazole (nuStar)	85509-19-9	0.043	Schedule 10
(Canada) Province of British Columbia	flutolanil	66332-96-5	3.7	Schedule 10
(Canada) Province of British Columbia	fluvalinate	69409-94-5	0.61	Schedule 10
(Canada) Province of British Columbia	folpet	133-07-3	1.4	Schedule 10
(Canada) Province of British Columbia	fomesafen	72178-02-0	0.026	Schedule 10
(Canada) Province of British Columbia	fonofos	944-22-9	0.12	Schedule 10
(Canada) Province of British Columbia	formaldehyde	50-00-0	9.2	Schedule 10
(Canada) Province of British Columbia	fosetyl-al	39148-24-8	100	Schedule 10
(Canada) Province of British Columbia	Freon 11 (trichlorofluoromethane)	75-69-4	0.39	Schedule 10
(Canada) Province of British Columbia	Freon 12 (dichlorodifluoromethane)	75-71-8	0.094	Schedule 10
(Canada) Province of British Columbia	furfural	98-01-1	0.18	Schedule 10
(Canada) Province of British Columbia	furmecyclox	60568-05-0	0.16	Schedule 10
(Canada) Province of British Columbia	glyphosate	1071-83-6	6.1	Schedule 10
(Canada) Province of British Columbia	haloxyfop-methyl	69806-40-2	0.0031	Schedule 10
(Canada) Province of British Columbia	harmony (thifensulfuron methyl)	79277-27-3	0.79	Schedule 10
(Canada) Province of British Columbia	HCH - (alpha) (hexachlorocyclohexane)	319-84-6	0.0009	Schedule 10
(Canada) Province of British Columbia	HCH - (beta) (hexachlorocyclohexane)	319-85-7	0.0032	Schedule 10
(Canada) Province of British Columbia	HCH -(gamma) (hexachlorocyclohexane) (lindane)	58-89-9	1e-05	Schedule 10
(Canada) Province of British Columbia	heptachlor	76-44-8	0.0011	Schedule 10
(Canada) Province of British Columbia	hexachlorocyclopentadiene	77-47-4	0.37	Schedule 10
(Canada) Province of British Columbia	hexazinone	51235-04-2	2	Schedule 10
(Canada) Province of British Columbia	imazalil	35554-44-0	0.79	Schedule 10
(Canada) Province of British Columbia	imazaquin	81335-37-7	15	Schedule 10
(Canada) Province of British Columbia	imazethapyr (pursuit)	81335-77-5	15	Schedule 10
(Canada) Province of British Columbia	iprodione	36734-19-7	2.4	Schedule 10
(Canada) Province of British Columbia	isopropalin	33820-53-0	0.92	Schedule 10
(Canada) Province of British Columbia	isoxaben	82558-50-7	3.1	Schedule 10
(Canada) Province of British Columbia	lactofen	77501-63-4	0.12	Schedule 10
(Canada) Province of British Columbia	linuron	330-55-2	0.12	Schedule 10
(Canada) Province of British Columbia	malathion	121-75-5	1.2	Schedule 10
(Canada) Province of British Columbia	mancozeb	8018-01-7	1.8	Schedule 10
(Canada) Province of British Columbia	maneb	12427-38-2	0.081	Schedule 10
(Canada) Province of British Columbia	MCPA (2-methyl-4-chlorophenoxyacetic acid)	94-74-6	0.031	Schedule 10
(Canada) Province of British Columbia	MCPB (4-(2-methyl-4-chlorophenoxy)butyric acid)	94-81-5	0.61	Schedule 10
(Canada) Province of British Columbia	MCPP (2-(2-methyl-4-chlorophenoxy)propionic acid)	93-65-2	0.061	Schedule 10
(Canada) Province of British Columbia	mecoprop-P (2-(2-methyl-1,4-chlorophenoxy)propionic acid)	16484-77-8	0.061	Schedule 10
(Canada) Province of British Columbia	mephosfolan	950-10-7	0.0055	Schedule 10
(Canada) Province of British Columbia	2-mercaptobenzothiazole	149-30-4	0.17	Schedule 10
(Canada) Province of British Columbia	merphos	150-50-5	0.0018	Schedule 10
(Canada) Province of British Columbia	merphos oxide (tribufos)	78-48-8	0.0018	Schedule 10
(Canada) Province of British Columbia	metalaxyl	57837-19-1	3.7	Schedule 10
(Canada) Province of British Columbia	methamidophos	10265-92-6	0.0031	Schedule 10
(Canada) Province of British Columbia	methidathion	950-37-8	0.061	Schedule 10
(Canada) Province of British Columbia	methomyl	16752-77-5	0.044	Schedule 10
(Canada) Province of British Columbia	methoxychlor	72-43-5	0.31	Schedule 10
(Canada) Province of British Columbia	methyl parathion (parathion-methyl)	298-00-0	0.015	Schedule 10
(Canada) Province of British Columbia	metribuzin	21087-64-9	1.5	Schedule 10
(Canada) Province of British Columbia	mirex	2385-85-5	0.0027	Schedule 10
(Canada) Province of British Columbia	molinate	2212-67-1	0.12	Schedule 10
(Canada) Province of British Columbia	myclobutanil (systhane)	88671-89-0	1.5	Schedule 10
(Canada) Province of British Columbia	napropamide	15299-99-7	6.1	Schedule 10
(Canada) Province of British Columbia	norflurazon	27314-13-2	2.4	Schedule 10
(Canada) Province of British Columbia	octamethylpyrophosphoramide (schradan)	152-16-9	0.12	Schedule 10
(Canada) Province of British Columbia	oryzalin	19044-88-3	3.1	Schedule 10
(Canada) Province of British Columbia	oxadiazon	19666-30-9	0.31	Schedule 10
(Canada) Province of British Columbia	oxamyl	23135-22-0	1.5	Schedule 10
(Canada) Province of British Columbia	oxyfluorfen	42874-03-3	0.18	Schedule 10
(Canada) Province of British Columbia	parathion	56-38-2	0.37	Schedule 10
(Canada) Province of British Columbia	pendimethalin	40487-42-1	2.4	Schedule 10
(Canada) Province of British Columbia	permethrin	52645-53-1	3.1	Schedule 10
(Canada) Province of British Columbia	phenmedipham	13684-63-4	15	Schedule 10
(Canada) Province of British Columbia	phorate	298-02-2	0.012	Schedule 10
(Canada) Province of British Columbia	phosmet	732-11-6	1.2	Schedule 10
(Canada) Province of British Columbia	phosphine	7803-51-2	0.018	Schedule 10
(Canada) Province of British Columbia	picloram	1918-02-1	4.3	Schedule 10
(Canada) Province of British Columbia	pirimiphos-methyl	29232-93-7	0.61	Schedule 10
(Canada) Province of British Columbia	prochloraz	67747-09-5	0.032	Schedule 10
(Canada) Province of British Columbia	prometon	1610-18-0	0.92	Schedule 10
(Canada) Province of British Columbia	prometryn	7287-19-6	0.24	Schedule 10
(Canada) Province of British Columbia	pronamide (propyzamide)	23950-58-5	4.6	Schedule 10
(Canada) Province of British Columbia	propachlor	1918-16-7	0.79	Schedule 10
(Canada) Province of British Columbia	1,2-propanediol (propylene glycol)	57-55-6	30	Schedule 10
(Canada) Province of British Columbia	propanil	709-98-8	0.31	Schedule 10
(Canada) Province of British Columbia	propargite	2312-35-8	1.2	Schedule 10
(Canada) Province of British Columbia	propazine	139-40-2	1.2	Schedule 10
(Canada) Province of British Columbia	propham	122-42-9	1.2	Schedule 10
(Canada) Province of British Columbia	propiconazole	60207-90-1	0.79	Schedule 10
(Canada) Province of British Columbia	propylene oxide	75-56-9	0.019	Schedule 10
(Canada) Province of British Columbia	pyridine	110-86-1	0.061	Schedule 10
(Canada) Province of British Columbia	quinalphos	13593-03-8	0.031	Schedule 10
(Canada) Province of British Columbia	resmethrin	10453-86-8	1.8	Schedule 10
(Canada) Province of British Columbia	rotenone	83-79-4	0.24	Schedule 10
(Canada) Province of British Columbia	sethoxydim	74051-80-2	5.5	Schedule 10
(Canada) Province of British Columbia	s-ethyl dipropylthiocarbamate (EPTC)	759-94-4	1.5	Schedule 10
(Canada) Province of British Columbia	silvex (2-(2,4,5-trichlorophenoxy)propionic acid) (2,4,5-TP)	93-72-1	0.49	Schedule 10
(Canada) Province of British Columbia	simazine	122-34-9	0.041	Schedule 10
(Canada) Province of British Columbia	strychnine	57-24-9	0.018	Schedule 10
(Canada) Province of British Columbia	2,4,5-T (2,4,5-trichlorophenoxyacetic acid)	93-76-5	0.61	Schedule 10
(Canada) Province of British Columbia	TBTO (tributyltin oxide)	56-35-9	0.018	Schedule 10
(Canada) Province of British Columbia	tebuthiuron	34014-18-1	4.3	Schedule 10
(Canada) Province of British Columbia	temephos	3383-96-8	1.2	Schedule 10
(Canada) Province of British Columbia	terbacil	5902-51-2	0.79	Schedule 10
(Canada) Province of British Columbia	terbufos	13071-79-9	0.0015	Schedule 10
(Canada) Province of British Columbia	terbutryn	886-50-0	0.061	Schedule 10
(Canada) Province of British Columbia	thiobencarb	28249-77-6	0.61	Schedule 10
(Canada) Province of British Columbia	thiofanox	39196-18-4	0.018	Schedule 10
(Canada) Province of British Columbia	thiophanate-methyl	23564-05-8	4.9	Schedule 10
(Canada) Province of British Columbia	thiram (tetramethylthiuram disulfide)	137-26-8	0.31	Schedule 10
(Canada) Province of British Columbia	toxaphene	8001-35-2	0.0044	Schedule 10
(Canada) Province of British Columbia	tralomethrin	66841-25-6	0.46	Schedule 10
(Canada) Province of British Columbia	triallate	2303-17-5	0.79	Schedule 10
(Canada) Province of British Columbia	triasulfuron	82097-50-5	0.61	Schedule 10
(Canada) Province of British Columbia	tridiphane	58138-08-2	0.18	Schedule 10
(Canada) Province of British Columbia	vernam (vernolate)	1929-77-7	0.061	Schedule 10
(Canada) Province of British Columbia	vinclozolin	50471-44-8	1.5	Schedule 10
(Canada) Province of British Columbia	warfarin	81-81-2	0.018	Schedule 10
(Canada) Province of British Columbia	zineb	12122-67-7	3.1	Schedule 10
(Canada) Province of Newfoundland and Laborador	Chlordane alpha-Chlordane beta-Chlordane		0.0045	CCME Lowest Soil/Sediment Criterion
(Canada) Province of Newfoundland and Laborador	Chlordane	57-74-9	0.0045	CCME Lowest Soil/Sediment Criterion
(Canada) Province of Newfoundland and Laborador	alpha-Chlordane	5103-71-9	0.0045	CCME Lowest Soil/Sediment Criterion
(Canada) Province of Newfoundland and Laborador	beta-Chlordane	5103-74-2	0.0045	CCME Lowest Soil/Sediment Criterion
(Canada) Province of Newfoundland and Laborador	Dichloro diphenyl dichloroethane, 2,2-Bis (pchlorophenyl)-1,1-dichloroethane	72-54-8	0.00122	CCME Lowest Soil/Sediment Criterion
(Canada) Province of Newfoundland and Laborador	Dichloro diphenyl ethylene, 1,1-Dichloro-2,2-bis(pchlorophenyl)-ethene	72-55-9	0.00207	CCME Lowest Soil/Sediment Criterion
(Canada) Province of Newfoundland and Laborador	Dichloro diphenyl trichloroethane; 2,2-Bis(pchlorophenyl)-1,1,1-trichloroethane	50-29-3	0.00119	CCME Lowest Soil/Sediment Criterion
(Canada) Province of Newfoundland and Laborador	Dieldrin	60-57-1	0.00071	CCME Lowest Soil/Sediment Criterion
(Canada) Province of Newfoundland and Laborador	Endosulphan		0.00267	CCME Lowest Soil/Sediment Criterion
(Canada) Province of Newfoundland and Laborador	Endosulphan	115-29-7	0.00267	CCME Lowest Soil/Sediment Criterion
(Canada) Province of Newfoundland and Laborador	Endosulphan	195-59-6	0.00267	CCME Lowest Soil/Sediment Criterion
(Canada) Province of Newfoundland and Laborador	Endosulphan	33213-65-9	0.00267	CCME Lowest Soil/Sediment Criterion
(Canada) Province of Newfoundland and Laborador	Heptachlor epoxide	1024-57-3	0.0006	CCME Lowest Soil/Sediment Criterion
(Canada) Province of Newfoundland and Laborador	Hexachlorocyclohexane, gamma- (γ-HCH, Lindane, γ-BHC)	58-89-9	0.00032	CCME Lowest Soil/Sediment Criterion
(Canada) Province of Newfoundland and Laborador	DDT (total)		0.7	Soil Quality Guidelines
(Canada) Province of Newfoundland and Laborador	DDT, o,p	789-02-6	0.7	Soil Quality Guidelines
(Canada) Province of Newfoundland and Laborador	DDT, p,p	50-29-3	0.7	Soil Quality Guidelines
(Canada) Province of Prince Edward Island	DDT (total)		0.7	Soil Quality Guidelines
(Canada) Province of Prince Edward Island	DDT, o,p	789-02-6	0.7	Soil Quality Guidelines
(Canada) Province of Prince Edward Island	DDT, p,p	50-29-3	0.7	Soil Quality Guidelines
(Canada) Province of Ontario	Aldrin	309-00-2	5e-05	Table 1
(Canada) Province of Ontario	Chlordane	12789-03-6	5e-05	Table 1
(Canada) Province of Ontario	DDD	72-54-8	5e-05	Table 1
(Canada) Province of Ontario	DDE	72-55-9	5e-05	Table 1
(Canada) Province of Ontario	DDT	50-29-3	0.0014	Table 1
(Canada) Province of Ontario	Dieldrin	60-57-1	5e-05	Table 1
(Canada) Province of Ontario	Endosulfan	115-29-7	4e-05	Table 1
(Canada) Province of Ontario	Endrin	72-20-8	4e-05	Table 1
(Canada) Province of Ontario	Heptachlor	76-44-8	5e-05	Table 1
(Canada) Province of Ontario	HeptachlorEpoxide	1024-57-3	5e-05	Table 1
(Canada) Province of Ontario	Hexachlorocyclohexane Gamma-	58-89-9	1e-05	Table 1
(Canada) Province of Ontario	Methoxychlor	72-43-5	5e-05	Table 1
(Canada) Province of Ontario	Pentachlorophenol	87-86-5	0.0001	Table 1
(Canada) Province of Ontario	Aldrin	309-00-2	5e-05	Table 2
(Canada) Province of Ontario	Chlordane	12789-03-6	5e-05	Table 2
(Canada) Province of Ontario	DDD	72-54-8	0.0033	Table 2
(Canada) Province of Ontario	DDE	72-55-9	0.00026	Table 2
(Canada) Province of Ontario	DDT	50-29-3	0.0014	Table 2
(Canada) Province of Ontario	Dieldrin	60-57-1	5e-05	Table 2
(Canada) Province of Ontario	Endosulfan	115-29-7	4e-05	Table 2
(Canada) Province of Ontario	Endrin	72-20-8	4e-05	Table 2
(Canada) Province of Ontario	Heptachlor	76-44-8	0.00015	Table 2
(Canada) Province of Ontario	HeptachlorEpoxide	1024-57-3	5e-05	Table 2
(Canada) Province of Ontario	Hexachlorocyclohexane Gamma-	58-89-9	5.6e-05	Table 2
(Canada) Province of Ontario	Methoxychlor	72-43-5	0.00013	Table 2
(Canada) Province of Ontario	Pentachlorophenol	87-86-5	0.0001	Table 2
(Canada) Province of Ontario	DDE	72-55-9	0.00033	Table 2
(Canada) Province of Ontario	Hexachlorocyclohexane Gamma-	58-89-9	6.3e-05	Table 2
(Canada) Province of Ontario	Aldrin	309-00-2	5e-05	Table 3
(Canada) Province of Ontario	Chlordane	12789-03-6	5e-05	Table 3
(Canada) Province of Ontario	DDD	72-54-8	0.0033	Table 3
(Canada) Province of Ontario	DDE	72-55-9	0.00026	Table 3
(Canada) Province of Ontario	DDT	50-29-3	0.0014	Table 3
(Canada) Province of Ontario	Dieldrin	60-57-1	5e-05	Table 3
(Canada) Province of Ontario	Endosulfan	115-29-7	4e-05	Table 3
(Canada) Province of Ontario	Endrin	72-20-8	4e-05	Table 3
(Canada) Province of Ontario	Heptachlor	76-44-8	0.00015	Table 3
(Canada) Province of Ontario	HeptachlorEpoxide	1024-57-3	5e-05	Table 3
(Canada) Province of Ontario	Hexachlorocyclohexane Gamma-	58-89-9	5.6e-05	Table 3
(Canada) Province of Ontario	Methoxychlor	72-43-5	0.00013	Table 3
(Canada) Province of Ontario	Pentachlorophenol	87-86-5	0.0001	Table 3
(Canada) Province of Ontario	DDE	72-55-9	0.00033	Table 3
(Canada) Province of Ontario	Hexachlorocyclohexane Gamma-	58-89-9	6.3e-05	Table 3
(Canada) Province of Ontario	Aldrin	309-00-2	5e-05	Table 4 Surface Soil
(Canada) Province of Ontario	Chlordane	12789-03-6	5e-05	Table 4 Surface Soil
(Canada) Province of Ontario	DDD	72-54-8	0.0033	Table 4 Surface Soil
(Canada) Province of Ontario	DDE	72-55-9	0.00026	Table 4 Surface Soil
(Canada) Province of Ontario	DDT	50-29-3	0.0014	Table 4 Surface Soil
(Canada) Province of Ontario	Dieldrin	60-57-1	5e-05	Table 4 Surface Soil
(Canada) Province of Ontario	Endosulfan	115-29-7	4e-05	Table 4 Surface Soil
(Canada) Province of Ontario	Endrin	72-20-8	4e-05	Table 4 Surface Soil
(Canada) Province of Ontario	Heptachlor	76-44-8	0.00015	Table 4 Surface Soil
(Canada) Province of Ontario	HeptachlorEpoxide	1024-57-3	5e-05	Table 4 Surface Soil
(Canada) Province of Ontario	Hexachlorocyclohexane Gamma-	58-89-9	5.6e-05	Table 4 Surface Soil
(Canada) Province of Ontario	Methoxychlor	72-43-5	0.00013	Table 4 Surface Soil
(Canada) Province of Ontario	Pentachlorophenol	87-86-5	0.0001	Table 4 Surface Soil
(Canada) Province of Ontario	DDE	72-55-9	0.00033	Table 4 Surface Soil
(Canada) Province of Ontario	Hexachlorocyclohexane Gamma-	58-89-9	6.3e-05	Table 4 Surface Soil
(Canada) Province of Ontario	Aldrin	309-00-2	5e-05	Table 5 Surface Soil
(Canada) Province of Ontario	Chlordane	12789-03-6	5e-05	Table 5 Surface Soil
(Canada) Province of Ontario	DDD	72-54-8	0.0033	Table 5 Surface Soil
(Canada) Province of Ontario	DDE	72-55-9	0.00026	Table 5 Surface Soil
(Canada) Province of Ontario	DDT	50-29-3	0.0014	Table 5 Surface Soil
(Canada) Province of Ontario	Dieldrin	60-57-1	5e-05	Table 5 Surface Soil
(Canada) Province of Ontario	Endosulfan	115-29-7	4e-05	Table 5 Surface Soil
(Canada) Province of Ontario	Endrin	72-20-8	4e-05	Table 5 Surface Soil
(Canada) Province of Ontario	Heptachlor	76-44-8	0.00015	Table 5 Surface Soil
(Canada) Province of Ontario	HeptachlorEpoxide	1024-57-3	5e-05	Table 5 Surface Soil
(Canada) Province of Ontario	Hexachlorocyclohexane Gamma-	58-89-9	5.6e-05	Table 5 Surface Soil
(Canada) Province of Ontario	Methoxychlor	72-43-5	0.00013	Table 5 Surface Soil
(Canada) Province of Ontario	Pentachlorophenol	87-86-5	0.0001	Table 5 Surface Soil
(Canada) Province of Ontario	DDE	72-55-9	0.00033	Table 5 Surface Soil
(Canada) Province of Ontario	Hexachlorocyclohexane Gamma-	58-89-9	6.3e-05	Table 5 Surface Soil
(Canada) Province of Ontario	Aldrin	309-00-2	5e-05	Table 6
(Canada) Province of Ontario	Chlordane	12789-03-6	5e-05	Table 6
(Canada) Province of Ontario	DDD	72-54-8	0.0033	Table 6
(Canada) Province of Ontario	DDE	72-55-9	0.00026	Table 6
(Canada) Province of Ontario	DDT	50-29-3	0.0014	Table 6
(Canada) Province of Ontario	Dieldrin	60-57-1	5e-05	Table 6
(Canada) Province of Ontario	Endosulfan	115-29-7	4e-05	Table 6
(Canada) Province of Ontario	Endrin	72-20-8	4e-05	Table 6
(Canada) Province of Ontario	Heptachlor	76-44-8	0.00015	Table 6
(Canada) Province of Ontario	HeptachlorEpoxide	1024-57-3	5e-05	Table 6
(Canada) Province of Ontario	Hexachlorocyclohexane Gamma-	58-89-9	5.6e-05	Table 6
(Canada) Province of Ontario	Methoxychlor	72-43-5	0.00013	Table 6
(Canada) Province of Ontario	Pentachlorophenol	87-86-5	0.0001	Table 6
(Canada) Province of Ontario	DDE	72-55-9	0.00033	Table 6
(Canada) Province of Ontario	Hexachlorocyclohexane Gamma-	58-89-9	6.3e-05	Table 6
(Canada) Province of Ontario	Aldrin	309-00-2	5e-05	Table 7
(Canada) Province of Ontario	Chlordane	12789-03-6	5e-05	Table 7
(Canada) Province of Ontario	DDD	72-54-8	0.0033	Table 7
(Canada) Province of Ontario	DDE	72-55-9	0.00026	Table 7
(Canada) Province of Ontario	DDT	50-29-3	0.0014	Table 7
(Canada) Province of Ontario	Dieldrin	60-57-1	5e-05	Table 7
(Canada) Province of Ontario	Endosulfan	115-29-7	4e-05	Table 7
(Canada) Province of Ontario	Endrin	72-20-8	4e-05	Table 7
(Canada) Province of Ontario	Heptachlor	76-44-8	0.00015	Table 7
(Canada) Province of Ontario	HeptachlorEpoxide	1024-57-3	5e-05	Table 7
(Canada) Province of Ontario	Hexachlorocyclohexane Gamma-	58-89-9	5.6e-05	Table 7
(Canada) Province of Ontario	Methoxychlor	72-43-5	0.00013	Table 7
(Canada) Province of Ontario	Pentachlorophenol	87-86-5	0.0001	Table 7
(Canada) Province of Ontario	DDE	72-55-9	0.00033	Table 7
(Canada) Province of Ontario	Hexachlorocyclohexane Gamma-	58-89-9	6.3e-05	Table 7
(Canada) Province of Ontario	Aldrin	309-00-2	5e-05	Table 8
(Canada) Province of Ontario	Chlordane	12789-03-6	5e-05	Table 8
(Canada) Province of Ontario	DDD	72-54-8	5e-05	Table 8
(Canada) Province of Ontario	DDE	72-55-9	5e-05	Table 8
(Canada) Province of Ontario	DDT	50-29-3	0.0014	Table 8
(Canada) Province of Ontario	Dieldrin	60-57-1	5e-05	Table 8
(Canada) Province of Ontario	Endosulfan	115-29-7	4e-05	Table 8
(Canada) Province of Ontario	Endrin	72-20-8	4e-05	Table 8
(Canada) Province of Ontario	Heptachlor	76-44-8	5e-05	Table 8
(Canada) Province of Ontario	HeptachlorEpoxide	1024-57-3	5e-05	Table 8
(Canada) Province of Ontario	Hexachlorocyclohexane Gamma-	58-89-9	1e-05	Table 8
(Canada) Province of Ontario	Methoxychlor	72-43-5	5e-05	Table 8
(Canada) Province of Ontario	Pentachlorophenol	87-86-5	0.0001	Table 8
(Canada) Province of Ontario	Aldrin	309-00-2	5e-08	Table 9
(Canada) Province of Ontario	Chlordane	12789-03-6	5e-08	Table 9
(Canada) Province of Ontario	DDD	72-54-8	5e-08	Table 9
(Canada) Province of Ontario	DDE	72-55-9	5e-08	Table 9
(Canada) Province of Ontario	DDT	50-29-3	1.4e-06	Table 9
(Canada) Province of Ontario	Dieldrin	60-57-1	5e-08	Table 9
(Canada) Province of Ontario	Endosulfan	115-29-7	4e-08	Table 9
(Canada) Province of Ontario	Endrin	72-20-8	4e-08	Table 9
(Canada) Province of Ontario	Heptachlor	76-44-8	5e-08	Table 9
(Canada) Province of Ontario	HeptachlorEpoxide	1024-57-3	5e-08	Table 9
(Canada) Province of Ontario	Hexachlorocyclohexane Gamma-	58-89-9	1e-08	Table 9
(Canada) Province of Ontario	Methoxychlor	72-43-5	5e-08	Table 9
(Canada) Province of Ontario	Pentachlorophenol	87-86-5	1e-07	Table 9
(Canada) Province of Ontario	Aldrin	309-00-2	0.002	OMOE Lowest Soil/Sediment Criterion
(Canada) Province of Ontario	Chlordane alpha-Chlordane beta-Chlordane		0.007	OMOE Lowest Soil/Sediment Criterion
(Canada) Province of Ontario	Chlordane	57-74-9	0.007	OMOE Lowest Soil/Sediment Criterion
(Canada) Province of Ontario	alpha-Chlordane	5103-71-9	0.007	OMOE Lowest Soil/Sediment Criterion
(Canada) Province of Ontario	beta-Chlordane	5103-74-2	0.007	OMOE Lowest Soil/Sediment Criterion
(Canada) Province of Ontario	Dichloro diphenyl dichloroethane, 2,2-Bis (pchlorophenyl)-1,1-dichloroethane	72-54-8	0.008	OMOE Lowest Soil/Sediment Criterion
(Canada) Province of Ontario	Dichloro diphenyl ethylene, 1,1-Dichloro-2,2-bis(pchlorophenyl)-ethene	72-55-9	0.005	OMOE Lowest Soil/Sediment Criterion
(Canada) Province of Ontario	Dichloro diphenyl trichloroethane; 2,2-Bis(pchlorophenyl)-1,1,1-trichloroethane	50-29-3	0.007	OMOE Lowest Soil/Sediment Criterion
(Canada) Province of Ontario	Dieldrin	60-57-1	0.002	OMOE Lowest Soil/Sediment Criterion
(Canada) Province of Ontario	Endosulphan		0.003	OMOE Lowest Soil/Sediment Criterion
(Canada) Province of Ontario	Endosulphan	115-29-7	0.003	OMOE Lowest Soil/Sediment Criterion
(Canada) Province of Ontario	Endosulphan	195-59-6	0.003	OMOE Lowest Soil/Sediment Criterion
(Canada) Province of Ontario	Endosulphan	33213-65-9	0.003	OMOE Lowest Soil/Sediment Criterion
(Canada) Province of Ontario	Heptachlor	76-44-8	0.05	OMOE Lowest Soil/Sediment Criterion
(Canada) Province of Ontario	Heptachlor epoxide	1024-57-3	0.005	OMOE Lowest Soil/Sediment Criterion
(Canada) Province of Ontario	Hexachlorobutadiene	87-68-3	0.01	OMOE Lowest Soil/Sediment Criterion
(Canada) Province of Ontario	Hexachlorocyclohexane, gamma- (γ-HCH, Lindane, γ-BHC)	58-89-9	0.01	OMOE Lowest Soil/Sediment Criterion
(Canada) Province of Ontario	Hexachloroethane	67-72-1	0.01	OMOE Lowest Soil/Sediment Criterion
(Canada) Province of Ontario	Methoxychlor	72-43-5	0.05	OMOE Lowest Soil/Sediment Criterion
(Canada) Province of Quebec	Tebuthiuron	34014-18-1	50	Appx 2
(Canada) Nunavut	DDT (total)		0.9	Table A 4-1
(Canada) Nunavut	DDD, p,p	72-54-8	0.9	Table A 4-1
(Canada) Nunavut	DDE	72-55-9	0.9	Table A 4-1
(Canada) Nunavut	DDT, o,p	789-02-6	0.9	Table A 4-1
(Canada) Nunavut	DDT, p,p	50-29-3	0.9	Table A 4-1
(Canada) Nunavut	Pentachlorophenol	87-86-5	7.6	Table A 4-1
(Canada) Yukon	DDT (includes all metabolites)		0.015	Schedule 2
(Canada) Yukon	DDD, p,p'	72-54-8	0.015	Schedule 2
(Canada) Yukon	DDT, o,p	789-02-6	0.015	Schedule 2
(Canada) Yukon	DDT, p,p	50-29-3	0.015	Schedule 2
(Canada) Yukon	Pentachlorophenol	87-86-5	0.1	Schedule 2
16. Peoples Republic of China	BHC		0.5	GB 15618-1995
Peoples Republic of China	alpha-HCH	319-84-6	0.5	GB 15618-1995
Peoples Republic of China	beta-HCH	319-85-7	0.5	GB 15618-1995
Peoples Republic of China	delta-BHC	319-86-8	0.5	GB 15618-1995
Peoples Republic of China	Lindane	58-89-9	0.5	GB 15618-1995
Peoples Republic of China	DDT(4 todal metabolites)		0.5	GB 15618-1995
Peoples Republic of China	DDD, p,p'	72-54-8	0.5	GB 15618-1995
Peoples Republic of China	DDE	72-55-9	0.5	GB 15618-1995
Peoples Republic of China	DDT, o,p	789-02-6	0.5	GB 15618-1995
Peoples Republic of China	DDT, p,p	50-29-3	0.5	GB 15618-1995
Peoples Republic of China	DDT(4 todal metabolites)		0.1	HJ/T 332-2006
Peoples Republic of China	DDD, p,p'	72-54-8	0.1	HJ/T 332-2006
Peoples Republic of China	DDE	72-55-9	0.1	HJ/T 332-2006
Peoples Republic of China	DDT, o,p	789-02-6	0.1	HJ/T 332-2006
Peoples Republic of China	DDT, p,p	50-29-3	0.1	HJ/T 332-2006
Peoples Republic of China	BHC		0.1	HJ/T 332-2006
Peoples Republic of China	alpha-HCH	319-84-6	0.1	HJ/T 332-2006
Peoples Republic of China	beta-HCH	319-85-7	0.1	HJ/T 332-2006
Peoples Republic of China	delta-BHC	319-86-8	0.1	HJ/T 332-2006
Peoples Republic of China	Lindane	58-89-9	0.1	HJ/T 332-2006
Peoples Republic of China (Beijing)	alpha-HCH	319-84-6	0.1
Peoples Republic of China (Beijing)	beta-HCH	319-85-7	0.1
Peoples Republic of China (Beijing)	delta-BHC	319-86-8	0.1
Peoples Republic of China (Beijing)	Lindane	58-89-9	0.1
Peoples Republic of China (Beijing)	DDT(DDT, o,p and DDT, p,p)		1
Peoples Republic of China (Beijing)	DDT, o,p	789-02-6	1
Peoples Republic of China (Beijing)	DDT, p,p	50-29-3	1
Peoples Republic of China (Beijing)	DDE, p,p	72-55-9	1
Peoples Republic of China (Beijing)	DDD, p,p	72-54-8	2
Peoples Republic of China (Beijing)	Dieldrin	60-57-1	0.02
Peoples Republic of China (Beijing)	Aldrin	309-00-2	0.02
Peoples Republic of China (Beijing)	Endrin	72-20-8	4
Peoples Republic of China (Beijing)	DDVP	62-73-7	1
Peoples Republic of China (Beijing)	Dimethoate	60-51-5	2
18. Republic of Costa Rica	Aldrin	309-00-2	0.01	Table 1
Republic of Costa Rica	Dieldrin	60-57-1	0.6	Table 1
Republic of Costa Rica	Endrin	72-20-8	1.5	Table 1
Republic of Costa Rica	DDT	50-29-3	2	Table 1
Republic of Costa Rica	DDD	72-54-8	3	Table 1
Republic of Costa Rica	DDE	72-55-9	1	Table 1
Republic of Costa Rica	beta-HCH	319-85-7	0.1	Table 1
Republic of Costa Rica	Lindane	58-89-9	0.07	Table 1
19. (Croatia) Argercultural Uni. Of Zagreb	DDT/DDD/DDE (total concerntration = DDT+DDD+DDE)		0.1	LIFE05TYC/CRO/000105
(Croatia) Argercultural Uni. Of Zagreb	DDT	50-29-3	0.1	LIFE05TYC/CRO/000105
(Croatia) Argercultural Uni. Of Zagreb	DDD	72-54-8	0.1	LIFE05TYC/CRO/000105
(Croatia) Argercultural Uni. Of Zagreb	DDE	72-55-9	0.1	LIFE05TYC/CRO/000105
(Croatia) Argercultural Uni. Of Zagreb	Drina (total concentration = aldrins + Dieldrins+ endrins)		0.1	LIFE05TYC/CRO/000105
(Croatia) Argercultural Uni. Of Zagreb	Aldrin	309-00-2	0.1	LIFE05TYC/CRO/000105
(Croatia) Argercultural Uni. Of Zagreb	Dieldrin	60-57-1	0.1	LIFE05TYC/CRO/000105
(Croatia) Argercultural Uni. Of Zagreb	Endrin	72-20-8	0.1	LIFE05TYC/CRO/000105
(Croatia) Argercultural Uni. Of Zagreb	HCH compounds (total concentration = alphaHCH+ beta-HCH + gamma-HCH + delta-HCH)		0.1	LIFE05TYC/CRO/000105
(Croatia) Argercultural Uni. Of Zagreb	alpha-HCH	319-84-6	0.1	LIFE05TYC/CRO/000105
(Croatia) Argercultural Uni. Of Zagreb	beta-HCH	319-85-7	0.1	LIFE05TYC/CRO/000105
(Croatia) Argercultural Uni. Of Zagreb	delta-BHC	319-86-8	0.1	LIFE05TYC/CRO/000105
(Croatia) Argercultural Uni. Of Zagreb	Lindane	58-89-9	0.1	LIFE05TYC/CRO/000105
(Croatia) Argercultural Uni. Of Zagreb	Atrazin	1912-24-9	0.01	LIFE05TYC/CRO/000105
(Croatia) Argercultural Uni. Of Zagreb	Simazin	122-34-9	0.01	LIFE05TYC/CRO/000105
20. Czech Republic	Organic chlorinated (indiv.)	000-00-0	0.01	Decree 13/1994 Annex No.2
Czech Republic	Organic chlorinated (Total.)	none	0.1	Decree 13/1994 Annex No.2
Czech Republic	other (indiv.)	000-00-1	0.01	Decree 13/1994 Annex No.2
Czech Republic	other (total.)	none	0.1	Decree 13/1994 Annex No.2
Czech Republic	DDT	50-29-3	0.03	Carlon 2007
Czech Republic	DDE	72-55-9	0.025	Carlon 2007
Czech Republic	DDD	72-54-8	0.02	Carlon 2007
Czech Republic	HCH(alpha+beta+lindane)		0.01	Carlon 2007
Czech Republic	alpha-HCH	319-84-6	0.01	Carlon 2007
Czech Republic	beta-HCH	319-85-7	0.01	Carlon 2007
Czech Republic	Lindane	58-89-9	0.01	Carlon 2007
21. Kingdom of Denmark	DDT	50-29-3	1	Guidelines on Remediation Table 6.1
Kingdom of Denmark	Captafol	2425-06-1	10	Soil Quality Criteria
Kingdom of Denmark	DDT + DDE		0.5	Soil Quality Criteria
Kingdom of Denmark	DDT	50-29-3	0.5	Soil Quality Criteria
Kingdom of Denmark	DDE	72-55-9	0.5	Soil Quality Criteria
Kingdom of Denmark	Lindane	58-89-9	0.6	Soil Quality Criteria
Kingdom of Denmark	Paraquat	4685-14-7	5	Soil Quality Criteria
Kingdom of Denmark	Parathion	56-38-2	0.1	Soil Quality Criteria
Kingdom of Denmark	Pentachlorophenol	87-86-5	0.15	Soil Quality Criteria
22. Republic of Ecuador	hexachlorocyclohexane		0.01	Table 2
Republic of Ecuador	alpha-HCH	319-84-6	0.01	Table 2
Republic of Ecuador	beta-HCH	319-85-7	0.01	Table 2
Republic of Ecuador	BHC delta	319-86-8	0.01	Table 2
Republic of Ecuador	Lindane	58-89-9	0.01	Table 2
Republic of Ecuador	Endrin (total)		0.01	Table 3
Republic of Ecuador	Endrin	72-20-8	0.01	Table 3
Republic of Ecuador	Endrin aldehyde	7421-93-4	0.01	Table 3
Republic of Ecuador	Heptachlor	76-44-8	0.01	Table 3
Republic of Ecuador	Heptachlor epoxide	1024-57-3	0.01	Table 3
Republic of Ecuador	Hexachlorocyclohexanes (for each isomer)		0.01	Table 3
Republic of Ecuador	alpha-HCH	319-84-6	0.01	Table 3
Republic of Ecuador	beta-HCH	319-85-7	0.01	Table 3
Republic of Ecuador	BHC delta	319-86-8	0.01	Table 3
Republic of Ecuador	Lindane	58-89-9	0.01	Table 3
Republic of Ecuador	Atrazine	1912-24-9	0.005	Table 3
Republic of Ecuador	Carbofuran	1563-66-2	0.01	Table 3
Republic of Ecuador	Aldrin	309-00-2	0.1	Table 3
Republic of Ecuador	Dieldin	60-57-1	0.1	Table 3
Republic of Ecuador	Clordano	12789-03-6	0.1	Table 3
Republic of Ecuador	DDT(total)		0.1	Table 3
Republic of Ecuador	4.4-DDT	50-29-3	0.1	Table 3
Republic of Ecuador	4.4-DDE (p p’-DDX)	72-55-9	0.1	Table 3
Republic of Ecuador	4.4-DDD (p p’-TDE)	72-54-8	0.1	Table 3
Republic of Ecuador	Endosulfan (total)		0.1	Table 3
Republic of Ecuador	a- endosulfan-Alfa	959-98-8	0.1	Table 3
Republic of Ecuador	b- endosulfan-Beta	33213-65-9	0.1	Table 3
23. Republic of Estonia	2,4-D	94-75-7	0.5	Soil and GW hazardous substances limits
Republic of Estonia	Aldrin	309-00-2	1	Soil and GW hazardous substances limits
Republic of Estonia	dieldrin	60-57-1	0.5	Soil and GW hazardous substances limits
Republic of Estonia	Endrin	72-20-8	1	Soil and GW hazardous substances limits
Republic of Estonia	Isodrin	465-73-6	1	Soil and GW hazardous substances limits
Republic of Estonia	DDT	50-29-3	0.5	Soil and GW hazardous substances limits
Republic of Estonia	Hexachlorocyclohexanes (for each isomer)		0.2	Soil and GW hazardous substances limits
Republic of Estonia	alpha-HCH	319-84-6	0.2	Soil and GW hazardous substances limits
Republic of Estonia	beta-HCH	319-85-7	0.2	Soil and GW hazardous substances limits
Republic of Estonia	BHC delta	319-86-8	0.2	Soil and GW hazardous substances limits
Republic of Estonia	Lindane	58-89-9	0.2	Soil and GW hazardous substances limits
Republic of Estonia	Pesticides (total)	000-00-0	5	Soil and GW hazardous substances limits
24. Republic of Finland	Atrazine	1912-24-9	0.05
Republic of Finland	DDT-DDD-DDE		0.1
Republic of Finland	DDT	50-29-3	0.1
Republic of Finland	DDD	72-54-8	0.1
Republic of Finland	DDE	72-55-9	0.1
Republic of Finland	dieldrin	60-57-1	0.05
Republic of Finland	Endosulfan	115-29-7	0.1
Republic of Finland	Heptachlor	76-44-8	0.01
Republic of Finland	Lindane	58-89-9	0.01
Republic of Finland	TBT-TPT		0.1
Republic of Finland	TBT	000-00-0	0.1
Republic of Finland	TPT	000-00-0	0.1
25 Frenchi Republic (France)	Aldrin	309-00-2	2
Frenchi Republic (France)	Atrazine	1912-24-9	3
Frenchi Republic (France)	carbaryl	63-25-2	2
Frenchi Republic (France)	Carbofuran	1563-66-2	1
Frenchi Republic (France)	DDD,DDE,DDT total		2
Frenchi Republic (France)	DDT	50-29-3	2
Frenchi Republic (France)	DDD	72-54-8	2
Frenchi Republic (France)	DDE	72-55-9	2
Frenchi Republic (France)	Drins total		2
Frenchi Republic (France)	Aldrin	309-00-2	2
Frenchi Republic (France)	Dieldrin	60-57-1	2
Frenchi Republic (France)	Endrin	72-20-8	2
Frenchi Republic (France)	HCH Total		5
Frenchi Republic (France)	alpha-HCH	319-84-6	5
Frenchi Republic (France)	beta-HCH	319-85-7	5
Frenchi Republic (France)	BHC delta	319-85-8	5
Frenchi Republic (France)	Maneb	12427-38-2	17
Frenchi Republic (France)	Lindane	58-89-9	0.2
26. Georgia	2,4-D	94-75-7	0.1	N 538
Georgia	Atrazine	1912-24-9	0.01	N 538
Georgia	Bailetoni (assumed to be Bayleton)	43121-43-3	0.4	N 538
Georgia	DDT	50-29-3	0.1	N 538
Georgia	Dihydro Heptachlor	14168-01-5	0.5	Minister of Health, labor and social affaris
Georgia	(1 - (4 - nitrope Neil) -2 - amino - 1.3 - propandio	unknown	0.02	Minister of Health, labor and social affaris
Georgia	DDT	50-29-3	0.1	Minister of Health, labor and social affaris
Georgia	2 - oxo 2.5 - dihydropyran	unknown	0.4	Minister of Health, labor and social affaris
Georgia	2 - kloretilposponis (assumed to be CHLORO(DIETHYL)PHOSPHINE)	686-69-1	0.5	Minister of Health, labor and social affaris
Georgia	2,3,6 - tva	unknown	0.15	Minister of Health, labor and social affaris
Georgia	2.4 butilis Streaming	unknown	0.15	Minister of Health, labor and social affaris
Georgia	2,4-D	94-75-7	0.1	Minister of Health, labor and social affaris
Georgia	2,4 - and less volatile ether	000-00-0	0.15	Minister of Health, labor and social affaris
Georgia	2,4 - d oktilis Streaming	unknown	0.15	Minister of Health, labor and social affaris
Georgia	2.6 - butidinis - rust	unknown	0.1	Minister of Health, labor and social affaris
Georgia	5 - ethyl -5 - hidroksimetil -2 - (puril-2) -1,3 - dioksani	unknown	0.2	Minister of Health, labor and social affaris
Georgia	6 - methyl -2 - tiouratsilis sodium salt	unknown	0.1	Minister of Health, labor and social affaris
Georgia	(4 - chlorphenol) - 4,6 dimethyl -3 - carboxypyridine	unknown	0.2	Minister of Health, labor and social affaris
Georgia	Dioxide - ethyl) morpolinis (assumed to be Morpholine, 4-(mercaptoacetyl)-, S-ester with O,O-dimethyl phosphorodithioate)	unknown	0.15	Minister of Health, labor and social affaris
Georgia	- (2,4 (diklorpenil)- B - propylene - etiltiopospati	144-41-2	0.1	Minister of Health, labor and social affaris
Georgia	ethyl - phenyl S -profiltiophospati	123441-03-2	0.05	Minister of Health, labor and social affaris
Georgia	Avermectin	71751-41-2	0.5	Minister of Health, labor and social affaris
Georgia	Aziprotrini (assumed to be Aziprotryne)	4658-28-0	0.1	Minister of Health, labor and social affaris
Georgia	Fosetyl-Al	39148-24-8	0.5	Minister of Health, labor and social affaris
Georgia	Amitratsi (assumed to be Amitraz)	33089-61-1	0.2	Minister of Health, labor and social affaris
Georgia	Ammonium glufosinate	51276-47-2	0.1	Minister of Health, labor and social affaris
Georgia	Atrazine	1912-24-9	0.1	Minister of Health, labor and social affaris
Georgia	Akvo - oxide -2 - methylpyridin manganese chloride	unknown	0.02	Minister of Health, labor and social affaris
Georgia	Atsetoklori (assumed to be Acetochlor)	34256-82-1	0.5	Minister of Health, labor and social affaris
Georgia	Acifluorfen	50594-66-6	0.2	Minister of Health, labor and social affaris
Georgia	Benomyl	17804-35-2	0.1	Minister of Health, labor and social affaris
Georgia	bensultap	17606-31-4	0.06	Minister of Health, labor and social affaris
Georgia	Bentazon	25057-89-0	0.15	Minister of Health, labor and social affaris
Georgia	Cyfluthrin, beta	68359-37-5	0.2	Minister of Health, labor and social affaris
Georgia	resmethrin	10453-86-8	0.05	Minister of Health, labor and social affaris
Georgia	Bifenthrin	82657-04-3	0.1	Minister of Health, labor and social affaris
Georgia	Bromophos	2104-96-3	0.2	Minister of Health, labor and social affaris
Georgia	Bromoxynil	25671-46-9	0.1	Minister of Health, labor and social affaris
Georgia	Bromopropylate	18181-80-1	0.05	Minister of Health, labor and social affaris
Georgia	Bromuconazole	116255-48-2	10.1	Minister of Health, labor and social affaris
Georgia	Bronopoli	52-51-7	0.5	Minister of Health, labor and social affaris
Georgia	Butylate	2008-41-5	0.6	Minister of Health, labor and social affaris
Georgia	Galaksipopeto Ksietili	unknown	0.15	Minister of Health, labor and social affaris
Georgia	Galaksipopme Tili	unknown	0.15	Minister of Health, labor and social affaris
Georgia	Glyphosate	1071-83-6	0.5	Minister of Health, labor and social affaris
Georgia	Glyphosate, diammonium salt	114370-14-8	0.5	Minister of Health, labor and social affaris
Georgia	Glyphosate-trimesium	81591-81-3	0.8	Minister of Health, labor and social affaris
Georgia	Guazatine	19010-48-1	0.1	Minister of Health, labor and social affaris
Georgia	Dalapon	75-99-0	0.5	Minister of Health, labor and social affaris
Georgia	Deltametrina	52918-63-5	0.01	Minister of Health, labor and social affaris
Georgia	Desmedipham	13684-56-5	0.25	Minister of Health, labor and social affaris
Georgia	Desmetryn	1014-69-3	0.1	Minister of Health, labor and social affaris
Georgia	Diazinon	333-41-5	0.1	Minister of Health, labor and social affaris
Georgia	Diafenthiuron	80060-09-9	0.2	Minister of Health, labor and social affaris
Georgia	Ditianon	3347-22-6	0.02	Minister of Health, labor and social affaris
Georgia	Dicamba	1918-00-9	0.25	Minister of Health, labor and social affaris
Georgia	Dikvati	unknown	0.2	Minister of Health, labor and social affaris
Georgia	Dicofol	115-32-2	1	Minister of Health, labor and social affaris
Georgia	Dimethenamid	87674-68-8	0.1	Minister of Health, labor and social affaris
Georgia	Dimetoato	60-51-5	0.1	Minister of Health, labor and social affaris
Georgia	Dimethomorph	110488-70-5	0.04	Minister of Health, labor and social affaris
Georgia	Dinobuton	973-21-7	1	Minister of Health, labor and social affaris
Georgia	Dinocap	39300-45-3	0.2	Minister of Health, labor and social affaris
Georgia	D (+) -1 - (paranitropenili) - 1.3 - dioksiizopropil - amonium-2_ Kloretilposponis acid		0.5	Minister of Health, labor and social affaris
Georgia	Dipropetryn	4147-51-7	0.3	Minister of Health, labor and social affaris
Georgia	Ditalimfos	5131-24-8	0.15	Minister of Health, labor and social affaris
Georgia	Diuron	330-54-1	0.5	Minister of Health, labor and social affaris
Georgia	Diphenamid	957-51-7	0.25	Minister of Health, labor and social affaris
Georgia	Difenoconazole	119446-68-3	0.1	Minister of Health, labor and social affaris
Georgia	Diflufenican	83164-33-4	0.05	Minister of Health, labor and social affaris
Georgia	Dichlorprop-P	15165-67-0	0.1	Minister of Health, labor and social affaris
Georgia	Dichlorvos	62-73-7	0.03	Minister of Health, labor and social affaris
Georgia	Dichlofluanid	1085-98-9	0.2	Minister of Health, labor and social affaris
Georgia	Ethirimol	23947-60-6	0.15	Minister of Health, labor and social affaris
Georgia	Etomidate	33125-97-2	0.2	Minister of Health, labor and social affaris
Georgia	Endosulfan	115-29-7	0.1	Minister of Health, labor and social affaris
Georgia	Epibrassinolidi (assumed to be 24-Epibrassinolide)	78821-43-9	0.5	Minister of Health, labor and social affaris
Georgia	Esfenvalerate	66230-04-4	0.1	Minister of Health, labor and social affaris
Georgia	Ethephon	16672-87-0	0.5	Minister of Health, labor and social affaris
[truncated: 2,649 more rows]

## Sheet: U.S. Soil RGVs
U.S. Jurisdiction Name	Pesticide Name	CAS No.	U.S. Pesticide Soil RGVs (mg/kg)	References
1. Agency of Toxic Substance and Disease Registry	Aldrin	309-00-2	0.04	ASTDR CREG
Agency of Toxic Substance and Disease Registry	Chlordane	12789-03-6	0.002	ASTDR CREG
Agency of Toxic Substance and Disease Registry	DDD	72-54-8	0.003	ASTDR CREG
Agency of Toxic Substance and Disease Registry	DDE, p,p'-	72-55-9	0.002	ASTDR CREG
Agency of Toxic Substance and Disease Registry	DDT	50-29-3	0.002	ASTDR CREG
Agency of Toxic Substance and Disease Registry	Dieldrin	60-57-1	0.04	ASTDR CREG
Agency of Toxic Substance and Disease Registry	Heptachlor	76-44-8	0.2	ASTDR CREG
Agency of Toxic Substance and Disease Registry	Heptachlor Epoxide	1024-57-3	0.08	ASTDR CREG
Agency of Toxic Substance and Disease Registry	Hexachlorocyclohexane, Alpha-	319-84-6	0.1	ASTDR CREG
Agency of Toxic Substance and Disease Registry	Pentachlorophenol	87-86-5	6	ASTDR CREG
Agency of Toxic Substance and Disease Registry	Toxaphene	8001-35-2	0.6	ASTDR CREG
Agency of Toxic Substance and Disease Registry	Chlordane	12789-03-6	0.03	ASTDR RMEG
Agency of Toxic Substance and Disease Registry	Cresol, o-	95-48-7	100	ASTDR RMEG
Agency of Toxic Substance and Disease Registry	DDT	50-29-3	0.03	ASTDR RMEG
Agency of Toxic Substance and Disease Registry	Heptachlor	76-44-8	0.3	ASTDR RMEG
Agency of Toxic Substance and Disease Registry	Methoxychlor	72-43-5	10	ASTDR RMEG
Agency of Toxic Substance and Disease Registry	Chlordane	12789-03-6	0.03	ASTDR EMEG
Agency of Toxic Substance and Disease Registry	Chlorpyrifos	2921-88-2	50	ASTDR EMEG
Agency of Toxic Substance and Disease Registry	DDT	50-29-3	0.03	ASTDR EMEG
Agency of Toxic Substance and Disease Registry	Diazinon	333-41-5	40	ASTDR EMEG
Agency of Toxic Substance and Disease Registry	Dieldrin	60-57-1	5	ASTDR EMEG
Agency of Toxic Substance and Disease Registry	Endosulfan	115-29-7	100	ASTDR EMEG
Agency of Toxic Substance and Disease Registry	Endrin	72-20-8	0.6	ASTDR EMEG
Agency of Toxic Substance and Disease Registry	Heptachlor	76-44-8	0.005	ASTDR EMEG
Agency of Toxic Substance and Disease Registry	Heptachlor Epoxide	1024-57-3	0.7	ASTDR EMEG
Agency of Toxic Substance and Disease Registry	Malathion	121-75-5	1000	ASTDR EMEG
2. Department of Energy	DDT	50-29-3	34.3
Department of Energy	Aldrin	309-00-2	2.06
Department of Energy	Endosulfan	959-98-8	410
Department of Energy	Lindane	58-89-9	20.6
Department of Energy	Heptachlor	76-44-8	34.3
Department of Energy	Mirex	2385-85-5	13.7
Department of Energy	Herbicides
Department of Energy	Dichlorophenoxy Acetic Acid, 2,4-	94-75-7	550
Department of Energy	Dinoseb	88-85-7	68.6
Department of Energy	MCPP	93-65-2	68.6
Department of Energy	m-Terphenyl	92-06-8	3400
Department of Energy	DDT	50-29-3	0.00125
Department of Energy	Aldrin	309-00-2	6.47e-05
Department of Energy	Endosulfan	959-98-8	6.05
Department of Energy	Lindane	58-89-9	0.000533
Department of Energy	Heptachlor	76-44-8	0.000483
Department of Energy	Mirex	2385-85-5	1.07e-06
Department of Energy	Herbicides
Department of Energy	Dichlorophenoxy Acetic Acid, 2,4-	94-75-7	7.24
Department of Energy	Dinoseb	88-85-7	1.17
Department of Energy	MCPP	93-65-2	0.636
Department of Energy	m-Terphenyl	92-06-8	23.4
3. National Aeronautics and Space Administration	DDT	50-29-3	34.3
National Aeronautics and Space Administration	Aldrin	309-00-2	2.06
National Aeronautics and Space Administration	Endosulfan	959-98-8	410
National Aeronautics and Space Administration	Lindane	58-89-9	20.6
National Aeronautics and Space Administration	Heptachlor	76-44-8	34.3
National Aeronautics and Space Administration	Mirex	2385-85-5	13.7
National Aeronautics and Space Administration	Herbicides
National Aeronautics and Space Administration	Dichlorophenoxy Acetic Acid, 2,4-	94-75-7	550
National Aeronautics and Space Administration	Dinoseb	88-85-7	68.6
National Aeronautics and Space Administration	MCPP	93-65-2	68.6
National Aeronautics and Space Administration	m-Terphenyl	92-06-8	3400
National Aeronautics and Space Administration	DDT	50-29-3	0.00125
National Aeronautics and Space Administration	Aldrin	309-00-2	6.47e-05
National Aeronautics and Space Administration	Endosulfan	959-98-8	6.05
National Aeronautics and Space Administration	Lindane	58-89-9	0.000533
National Aeronautics and Space Administration	Heptachlor	76-44-8	0.000483
National Aeronautics and Space Administration	Mirex	2385-85-5	1.07e-06
National Aeronautics and Space Administration	Herbicides
National Aeronautics and Space Administration	Dichlorophenoxy Acetic Acid, 2,4-	94-75-7	7.24
National Aeronautics and Space Administration	Dinoseb	88-85-7	1.17
National Aeronautics and Space Administration	MCPP	93-65-2	0.636
National Aeronautics and Space Administration	m-Terphenyl	92-06-8	23.4
4. National Oceanic and Atmospheric Administration	245 T	93-76-5	596
National Oceanic and Atmospheric Administration	24 D	94-75-7	27.2
National Oceanic and Atmospheric Administration	Acrolein	107-02-8	5270
National Oceanic and Atmospheric Administration	Aramite	140-57-8	16600
National Oceanic and Atmospheric Administration	Benzyl Alcohol	100-51-6	65800
National Oceanic and Atmospheric Administration	Hexachlorocyclohexane, Alpha-	319-84-6	99.4
National Oceanic and Atmospheric Administration	Delta BHC	316-86-8	9940
National Oceanic and Atmospheric Administration	Bis(2-chloroethyl)ether	111-44-4	23700
National Oceanic and Atmospheric Administration	Chloroaniline, p-	106-47-8	1100
National Oceanic and Atmospheric Administration	Cresol, m-	108-39-4	3490
National Oceanic and Atmospheric Administration	Cresol, o	95-48-7	40400
National Oceanic and Atmospheric Administration	Cresol, p	106-44-5	163000
National Oceanic and Atmospheric Administration	Cresols	1319-77-3	3490
National Oceanic and Atmospheric Administration	DDD	72-54-8	758
National Oceanic and Atmospheric Administration	DDE, p,p'-	72-55-9	596
National Oceanic and Atmospheric Administration	DDT	50-29-3	3.5
National Oceanic and Atmospheric Administration	Sum of DDD DDE DDT	NA	21
National Oceanic and Atmospheric Administration	Diallate	2303-16-4	452
National Oceanic and Atmospheric Administration	Dieldrin	60-57-1	2.38
National Oceanic and Atmospheric Administration	Dimethoate	60-51-5	218
National Oceanic and Atmospheric Administration	Dinoseb	88-85-7	2.18
National Oceanic and Atmospheric Administration	Diuron	330-54-1	19.9
National Oceanic and Atmospheric Administration	Endosulfan	115-29-7	119
National Oceanic and Atmospheric Administration	Endosulfan Sulfate	1031-07-8	35.8
National Oceanic and Atmospheric Administration	Endrin	72-20-8	10.1
National Oceanic and Atmospheric Administration	Endrin aldehyde	7421-93-4	10.5
National Oceanic and Atmospheric Administration	Heptachlor	76-44-8	5.98
National Oceanic and Atmospheric Administration	Heptachlor Epoxide	1024-57-3	152
National Oceanic and Atmospheric Administration	Hexachlorocyclopentadiene	77-47-4	755
National Oceanic and Atmospheric Administration	Kepone	143-50-0	32.7
National Oceanic and Atmospheric Administration	Methoxychlor	72-43-5	19.9
National Oceanic and Atmospheric Administration	Methyl Parathion	298-00-0	0.292
National Oceanic and Atmospheric Administration	Pentachlorophenol	87-86-5	119
National Oceanic and Atmospheric Administration	Phenacetin	62-44-2	11700
National Oceanic and Atmospheric Administration	Phorate	298-02-2	0.496
National Oceanic and Atmospheric Administration	Pyridine	110-86-1	1030
National Oceanic and Atmospheric Administration	Safrole	94-59-7	404
National Oceanic and Atmospheric Administration	Tetraethyl Dithiopyrophosphate	3689-24-5	596
National Oceanic and Atmospheric Administration	Toxaphene	8001-35-2	119
5. U.S. Military	Acephate	30560-19-1	848
U.S. Military	Acetochlor	34256-82-1	4240
U.S. Military	Acifluorfen-Sodium	62476-59-9	2760
U.S. Military	Acrolein	107-02-8	0.323
U.S. Military	Alachlor	15972-60-8	2120
U.S. Military	ALAR	1596-84-5	31800
U.S. Military	Aldicarb	116-06-3	212
U.S. Military	Aldicarb Sulfone	1646-88-4	212
U.S. Military	Aldrin	309-00-2	7.07
U.S. Military	Ally	74223-64-6	53000
U.S. Military	Aluminum Phosphide	20859-73-8	84.8
U.S. Military	Amdro	67485-29-4	636
U.S. Military	Ametryn	834-12-8	19100
U.S. Military	Amitraz	33089-61-1	530
U.S. Military	Ammonium Sulfamate	7773-06-0	424000
U.S. Military	Antimony Potassium Tartrate	11071-15-1	191
U.S. Military	Apollo	74115-24-5	2760
U.S. Military	Aramite	140-57-8	21200
U.S. Military	Arsine	7784-42-1	46600
U.S. Military	Assure	76578-14-8	1910
U.S. Military	Asulam	3337-71-1	10600
U.S. Military	Atrazine	1912-24-9	636
U.S. Military	Avermectin B1	65195-55-3	84.8
U.S. Military	Azobenzene	103-33-3	13500
U.S. Military	Baygon	114-26-1	848
U.S. Military	Bayleton	43121-43-3	6360
U.S. Military	Baythroid	68359-37-5	5300
U.S. Military	Benefin	1861-40-1	63600
U.S. Military	Benomyl	17804-35-2	10600
U.S. Military	Bentazon	25057-89-0	6360
U.S. Military	Bidrin	141-66-2	21.2
U.S. Military	Bifenox	42576-02-3	212000
U.S. Military	Biphenthrin	82657-04-3	3180
U.S. Military	Bis(2-chloroethyl)ether	111-44-4	150
U.S. Military	Bromophos	2104-96-3	10600
U.S. Military	Bromoxynil	1689-84-5	4240
U.S. Military	Bromoxynil Octanoate	1689-99-2	4240
U.S. Military	Busan	21564-17-0	63600
U.S. Military	Butylate	2008-41-5	10600
U.S. Military	Cacodylic Acid	75-60-5	4240
U.S. Military	Captafol	2425-06-1	4240
U.S. Military	Captan	133-06-2	27600
U.S. Military	Carbaryl	63-25-2	21200
U.S. Military	Carbofuran	1563-66-2	1060
U.S. Military	Carbosulfan	55285-14-8	2120
U.S. Military	Carboxin	5234-68-4	21200
U.S. Military	Chloramben	133-90-4	3180
U.S. Military	Chloranil	118-75-2	3680
U.S. Military	Chlordane	12789-03-6	118
U.S. Military	Chlordecone (Kepone)	143-50-0	106
U.S. Military	Chlorfenvinphos	470-90-6	424
U.S. Military	Chlorimuron, Ethyl	90982-32-4	4240
U.S. Military	Chloro-2-methylaniline, 4-	95-69-2	3230
U.S. Military	Chloroaniline, p-	106-47-8	106
U.S. Military	Chlorobenzilate	510-15-6	3540
U.S. Military	Chloronitrobenzene, o-	88-73-3	0.619
U.S. Military	Chlorothalonil	1897-45-6	2650
U.S. Military	Chlorotoluene, o-	95-49-8	42400
U.S. Military	Chlorpropham	101-21-3	42400
U.S. Military	Chlorpyrifos	2921-88-2	636
U.S. Military	Chlorpyrifos Methyl	5598-13-0	21200
U.S. Military	Chlorsulfuron	64902-72-3	10600
U.S. Military	Chlorthiophos	60238-56-4	170
U.S. Military	Cresol, m-	108-39-4	106000
U.S. Military	Cresol, o	95-48-7	106000
U.S. Military	Cresol, p	106-44-5	1000
U.S. Military	Cyanazine	21725-46-2	424
U.S. Military	Cyanogen Bromide	506-68-3	19100
U.S. Military	Cyanogen Chloride	506-77-4	10600
U.S. Military	Cyhalothrin/karate	68085-85-8	2120
U.S. Military	Cypermethrin	52315-07-8	2120
U.S. Military	Cyromazine	66215-27-8	1590
U.S. Military	Dacthal	1861-32-1	2120
U.S. Military	Dalapon	75-99-0	6360
U.S. Military	DDD	72-54-8	5160
U.S. Military	DDE, p,p'-	72-55-9	3640
U.S. Military	DDT	50-29-3	100
U.S. Military	Demeton	8065-48-3	8.48
U.S. Military	Diallate	2303-16-4	20300
U.S. Military	Diazinon	333-41-5	424
U.S. Military	Dibromo-3-chloropropane, 1,2-	96-12-8	353
U.S. Military	Dibromobenzene, 1,4-	106-37-6	21200
U.S. Military	Dibromoethane, 1,2-	106-93-4	2.58
U.S. Military	Dicamba	1918-00-9	6360
U.S. Military	Dichloroacetic Acid	79-43-6	2550
U.S. Military	Dichlorophenoxy Acetic Acid, 2,4-	94-75-7	1930
U.S. Military	Dichlorophenoxy)butyric Acid, 4-	94-82-6	17000
U.S. Military	Dichloropropane, 1,2-	78-87-5	6.04
U.S. Military	Dichloropropene, 1,3-	542-75-6	9.36
U.S. Military	Dichlorvos	62-73-7	636
U.S. Military	Dieldrin	60-57-1	17.7
U.S. Military	Diethylformamide	617-84-5	212
U.S. Military	Diethylstilbestrol	56-53-1	263000
U.S. Military	Difenzoquat	43222-48-6	17000
U.S. Military	Diflubenzuron	35367-38-5	42400
U.S. Military	Diisopropyl Methylphosphonate	1445-75-6	170000
U.S. Military	Dimethipin	55290-64-7	4240
U.S. Military	Dimethoate	60-51-5	42.4
U.S. Military	Dimethylaniline, 2,4-	95-68-1	1980
U.S. Military	Dinitro-o-cresol, 4,6-	534-52-1	707
U.S. Military	Dinoseb	88-85-7	212
U.S. Military	Diphenamid	957-51-7	6360
U.S. Military	Diphenylamine	122-39-4	5300
U.S. Military	Diquat	85-00-7	467
U.S. Military	Disulfoton	298-04-4	15.9
U.S. Military	Diuron	330-54-1	424
U.S. Military	Dodine	2439-10-3	848
U.S. Military	Endosulfan	115-29-7	1060
U.S. Military	Endothall	145-73-3	4240
U.S. Military	Endrin	72-20-8	4240
U.S. Military	EPTC	759-94-4	5300
U.S. Military	Ethephon	16672-87-0	1060
U.S. Military	Ethion	563-12-2	424
U.S. Military	Ethylene Diamine	107-15-3	42400
U.S. Military	Ethyl-p-nitrophenyl Phosphonate	2104-64-5	21.2
U.S. Military	Express	101200-48-0	1700
U.S. Military	Fenamiphos	22224-92-6	53
U.S. Military	Fluometuron	2164-17-2	2760
U.S. Military	Fluridone	59756-60-4	17000
U.S. Military	Flurprimidol	56425-91-3	4240
U.S. Military	Flutolanil	66332-96-5	12700
U.S. Military	Fluvalinate	69409-94-5	2120
U.S. Military	Folpet	133-07-3	21200
U.S. Military	Fomesafen	72178-02-0	8710
U.S. Military	Fonofos	944-22-9	424
U.S. Military	Formaldehyde	50-00-0	63500
U.S. Military	Fosetyl-AL	39148-24-8	63600
U.S. Military	Furazolidone	67-45-8	391
U.S. Military	Furium	531-82-8	29.7
U.S. Military	Furmecyclox	60568-05-0	49500
U.S. Military	Glufosinate, Ammonium	77182-82-2	848
U.S. Military	Glutaraldehyde	111-30-8	707
U.S. Military	Glyphosate	1071-83-6	21200
U.S. Military	Haloxyfop, Methyl	69806-40-2	10.6
U.S. Military	Harmony	79277-27-3	2760
U.S. Military	Heptachlor	76-44-8	17.7
U.S. Military	Heptachlor Epoxide	1024-57-3	2.76
U.S. Military	Hexachlorocyclohexane, Alpha-	319-84-6	196
U.S. Military	Hexachlorocyclohexane, Beta-	319-85-7	127
U.S. Military	Hexachlorocyclohexane, Technical	608-73-1	825
U.S. Military	Hexachlorocyclopentadiene	77-47-4	3180
U.S. Military	Hexachlorophene (germicidal soaps)	70-30-4	191
U.S. Military	Hexazinone	51235-04-2	7000
U.S. Military	Imazalil	35554-44-0	2760
U.S. Military	Imazaquin	81335-37-7	53000
U.S. Military	Iprodione	36734-19-7	8480
U.S. Military	Isopropalin	33820-53-0	31800
U.S. Military	Isopropyl Methyl Phosphonic Acid	1832-54-8	212000
U.S. Military	Isoxaben	82558-50-7	10600
U.S. Military	Lactofen	77501-63-4	424
U.S. Military	Linuron	330-55-2	424
U.S. Military	Lindane	58-89-9	589
U.S. Military	Londax	83055-99-6	42400
U.S. Military	Malathion	121-75-5	3530
U.S. Military	Maleic Anhydride	108-31-6	21200
U.S. Military	Maleic Hydrazide	123-33-1	106000
U.S. Military	Mancozeb	8018-01-7	6360
U.S. Military	Maneb	12427-38-2	10600
U.S. Military	MCPA	94-74-6	106
U.S. Military	MCPB	94-81-5	21200
U.S. Military	MCPP	93-65-2	2120
U.S. Military	Mephosfolan	950-10-7	191
U.S. Military	Mepiquat Chloride	24307-26-4	63600
U.S. Military	Mercuric Chloride	7487-94-7	636
U.S. Military	Merphos	150-50-5	63.6
U.S. Military	Merphos Oxide (AKA Tribufos)	78-48-8	63.6
U.S. Military	Metalaxyl	57837-19-1	12700
U.S. Military	Methamidophos	10265-92-6	10.6
U.S. Military	Methidathion	950-37-8	212
U.S. Military	Methomyl	16752-77-5	5300
U.S. Military	Methoxychlor	72-43-5	884
U.S. Military	Methyl Parathion	298-00-0	124
U.S. Military	Methylnaphthalene, 1-	90-12-0	910
U.S. Military	Methylnaphthalene, 2-	91-57-6	52
U.S. Military	Metolachlor	51218-45-2	31800
U.S. Military	Metribuzin	21087-64-9	5300
U.S. Military	Mirex	2385-85-5	42.4
U.S. Military	Molinate	2212-67-1	424
U.S. Military	Naled	300-76-5	424
U.S. Military	Napropamide	15299-99-7	21200
U.S. Military	Nitrofurantoin	67-20-9	148000
U.S. Military	Norflurazon	27314-13-2	8480
U.S. Military	Nustar	85509-19-9	148
U.S. Military	Octamethylpyrophosphoramide	152-16-9	424
U.S. Military	Oryzalin	19044-88-3	10600
U.S. Military	Oxadiazon	19666-30-9	1060
U.S. Military	Oxamyl	23135-22-0	5300
U.S. Military	Paclobutrazol	76738-62-0	27600
U.S. Military	Paraquat Dichloride	1910-42-5	955
U.S. Military	Parathion	56-38-2	1270
U.S. Military	Pebulate	1114-71-2	10600
U.S. Military	Pendimethalin	40487-42-1	8480
U.S. Military	Pentachloronitrobenzene	82-68-8	1700
U.S. Military	Pentachlorophenol	87-86-5	141
U.S. Military	Permethrin	52645-53-1	42400
U.S. Military	Phenmedipham	13684-63-4	53000
U.S. Military	Phenylmercuric Acetate	62-38-4	17
U.S. Military	Phorate	298-02-2	42.4
U.S. Military	Phosgene	75-44-5	838000
U.S. Military	Phosmet	732-11-6	4240
U.S. Military	Phosphine	7803-51-2	63.6
U.S. Military	Picloram	1918-02-1	14800
U.S. Military	Pirimiphos, Methyl	29232-93-7	2120
U.S. Military	Potassium Silver Cyanide	506-61-6	42400
U.S. Military	Prochloraz	67747-09-5	1910
U.S. Military	Profluralin	26399-36-0	1270
U.S. Military	Prometon	1610-18-0	31800
U.S. Military	Prometryn	7287-19-6	848
U.S. Military	Propachlor	1918-16-7	27600
U.S. Military	Propanil	709-98-8	1060
U.S. Military	Propargite	2312-35-8	4240
U.S. Military	Propargyl Alcohol	107-19-7	4240
U.S. Military	Propazine	139-40-2	4240
U.S. Military	Propham	122-42-9	4240
U.S. Military	Propiconazole	60207-90-1	2760
U.S. Military	Propylene Glycol	57-55-6	1000000
U.S. Military	Propylene Oxide	75-56-9	56.4
U.S. Military	Pursuit	81335-77-5	53000
U.S. Military	Pydrin	51630-58-1	5300
U.S. Military	Pyridine	110-86-1	2120
U.S. Military	Quinalphos	13593-03-8	106
U.S. Military	Resmethrin	10453-86-8	6360
U.S. Military	Ronnel	299-84-3	10600
U.S. Military	Rotenone	83-79-4	848
U.S. Military	Savey	78587-05-0	5300
U.S. Military	Sethoxydim	74051-80-2	19100
U.S. Military	Simazine	122-34-9	1060
U.S. Military	Sodium Azide	26628-22-8	8480
U.S. Military	Sodium Diethyldithiocarbamate	148-18-5	5500
U.S. Military	Sodium Fluoroacetate	62-74-8	42.4
U.S. Military	Strychnine	57-24-9	636
U.S. Military	Systhane	88671-89-0	5300
U.S. Military	Tebuthiuron	34014-18-1	14800
U.S. Military	Temephos	3383-96-8	42400
U.S. Military	Terbacil	5902-51-2	2760
U.S. Military	Terbufos	13071-79-9	5.3
U.S. Military	Terbutryn	886-50-0	212
U.S. Military	Tetrachlorovinphos	961-11-5	6360
U.S. Military	Tetraethyl Dithiopyrophosphate	3689-24-5	1060
U.S. Military	Thallium Sulfate	7446-18-6	170
U.S. Military	Thiobencarb	28249-77-6	2120
U.S. Military	Thiofanox	39196-18-4	63.6
U.S. Military	Thiophanate, Methyl	23564-05-8	17000
U.S. Military	Thiram	137-26-8	1270
U.S. Military	Toxaphene	8001-35-2	212
U.S. Military	Tralomethrin	66841-25-6	1590
U.S. Military	Triallate	2303-17-5	2760
U.S. Military	Triasulfuron	82097-50-5	2120
U.S. Military	Tribromobenzene, 1,2,4-	615-54-3	10600
U.S. Military	Tributyltin Oxide	56-35-9	63.6
U.S. Military	Trichlorophenoxyacetic Acid, 2,4,5-	93-76-5	21200
U.S. Military	Triclosan	3380-34-5	848000
U.S. Military	Tridiphane	58138-08-2	636
U.S. Military	Trifluralin	1582-09-8	1330
U.S. Military	Vernam	1929-77-7	2120
U.S. Military	Vinclozolin	50471-44-8	5300
U.S. Military	Warfarin	81-81-2	63.6
U.S. Military	Zinc Phosphide	1314-84-7	636
U.S. Military	Zineb	12122-67-7	10600
1. Alabama State	Acrolein	107-02-8	0.01	(Volatiles) Table 2-2 Preliminary Screening Values
Alabama State	Acrylonitrile	107-13-1	0.21	(Volatiles) Table 2-2 Preliminary Screening Values
Alabama State	Aldrin	309-00-2	0.029	(Volatiles) Table 2-2 Preliminary Screening Values
Alabama State	Bromomethane (pesticide)	74-83-9	0.39	(Volatiles) Table 2-2 Preliminary Screening Values
Alabama State	1,2-Dibromo-3-chloropropane (DBCP)	96-12-8	0.46	(Volatiles) Table 2-2 Preliminary Screening Values
Alabama State	Dichloropropane, 1,2-	78-87-5	0.34	(Volatiles) Table 2-2 Preliminary Screening Values
Alabama State	1,3-Dichloropropene cis	542-75-6	0.78	(Volatiles) Table 2-2 Preliminary Screening Values
Alabama State	1,3-Dichloropropene trans	542-75-6	0.78	(Volatiles) Table 2-2 Preliminary Screening Values
Alabama State	hexachlorocyclobutadiene	87-69-3	6.2	(Volatiles) Table 2-2 Preliminary Screening Values
Alabama State	Trichlorofluoromethane	75-69-4	39	(Volatiles) Table 2-2 Preliminary Screening Values
Alabama State	Bis(2-chloroethyl)ether	111-44-4	0.22	(Semi-Volatiles) Table 2-2 Preliminary Screening Values
Alabama State	Hexachlorocyclopentadiene	77-47-4	37	(Semi-Volatiles) Table 2-2 Preliminary Screening Values
Alabama State	Methyl Parathion	298-00-0	1.5	(Semi-Volatiles) Table 2-2 Preliminary Screening Values
Alabama State	Cresol, o-	95-48-7	310	(Semi-Volatiles) Table 2-2 Preliminary Screening Values
Alabama State	Cresol, m-	108-39-4	310	(Semi-Volatiles) Table 2-2 Preliminary Screening Values
Alabama State	Cresol, p-	106-44-5	31	(Semi-Volatiles) Table 2-2 Preliminary Screening Values
Alabama State	Parathion	56-38-2	37	(Semi-Volatiles) Table 2-2 Preliminary Screening Values
Alabama State	Pentachlorophenol	87-86-5	3	(Semi-Volatiles) Table 2-2 Preliminary Screening Values
Alabama State	Propylene Glycol	57-55-6	3000	(Semi-Volatiles) Table 2-2 Preliminary Screening Values
Alabama State	Alachlor	15972-60-8	6	(Pesticides and Herbicides) Table 2-2 Preliminary Screening Values
Alabama State	Aldicarb	116-06-3	6.1	(Pesticides and Herbicides) Table 2-2 Preliminary Screening Values
Alabama State	Aldicarb Sulfone	1646-88-4	6.1	(Pesticides and Herbicides) Table 2-2 Preliminary Screening Values
Alabama State	Atrazine	1912-24-9	2.2	(Pesticides and Herbicides) Table 2-2 Preliminary Screening Values
Alabama State	Bis(2-chloro-1-methylethyl)ether	108-60-1	2.9	(Pesticides and Herbicides) Table 2-2 Preliminary Screening Values
Alabama State	Carbofuran	1563-66-2	31	(Pesticides and Herbicides) Table 2-2 Preliminary Screening Values
Alabama State	Chlordane	12789-03-6	1.6	(Pesticides and Herbicides) Table 2-2 Preliminary Screening Values
Alabama State	Chlorobenzilate	510-15-6	1.8	(Pesticides and Herbicides) Table 2-2 Preliminary Screening Values
Alabama State	Chlorpyrifos	2921-88-2	18	(Pesticides and Herbicides) Table 2-2 Preliminary Screening Values
Alabama State	Dalapon (2,2-dichloropropionic acid)(Sodium Salt)	75-99-0	180	(Pesticides and Herbicides) Table 2-2 Preliminary Screening Values
Alabama State	4,4' - DDD	72-54-8	2.4	(Pesticides and Herbicides) Table 2-2 Preliminary Screening Values
Alabama State	4,4' - DDE	72-55-9	1.7	(Pesticides and Herbicides) Table 2-2 Preliminary Screening Values
Alabama State	4,4' - DDT	50-29-3	1.7	(Pesticides and Herbicides) Table 2-2 Preliminary Screening Values
Alabama State	Diallate	2303-16-4	8	(Pesticides and Herbicides) Table 2-2 Preliminary Screening Values
Alabama State	2,4-Dichlorophenoxyacetic acid (2,4-D)	94-75-7	69	(Pesticides and Herbicides) Table 2-2 Preliminary Screening Values
Alabama State	Dieldrin	60-57-1	0.03	(Pesticides and Herbicides) Table 2-2 Preliminary Screening Values
Alabama State	Dimethoate	60-51-5	1.2	(Pesticides and Herbicides) Table 2-2 Preliminary Screening Values
Alabama State	2,4-Dinitro-6-sec-butylphenol (Dinoseb)	88-85-7	6.1	(Pesticides and Herbicides) Table 2-2 Preliminary Screening Values
Alabama State	Diquat	85-00-7	13	(Pesticides and Herbicides) Table 2-2 Preliminary Screening Values
Alabama State	Disulfoton	298-04-4	0.24	(Pesticides and Herbicides) Table 2-2 Preliminary Screening Values
Alabama State	Endosulfan	115-29-7	37	(Pesticides and Herbicides) Table 2-2 Preliminary Screening Values
Alabama State	Endothall	145-73-3	120	(Pesticides and Herbicides) Table 2-2 Preliminary Screening Values
Alabama State	Endrin	72-20-8	1.8	(Pesticides and Herbicides) Table 2-2 Preliminary Screening Values
Alabama State	Glyphosate	1071-83-6	610	(Pesticides and Herbicides) Table 2-2 Preliminary Screening Values
Alabama State	HCH (alpha) (alpha - BHC)	319-84-6	0.09	(Pesticides and Herbicides) Table 2-2 Preliminary Screening Values
Alabama State	HCH (beta) (beta - BHC)	319-85-7	0.32	(Pesticides and Herbicides) Table 2-2 Preliminary Screening Values
Alabama State	HCH (gamma) Lindane (gamma - BHC)	58-89-9	0.44	(Pesticides and Herbicides) Table 2-2 Preliminary Screening Values
Alabama State	Heptachlor	76-44-8	0.11	(Pesticides and Herbicides) Table 2-2 Preliminary Screening Values
Alabama State	Heptachlor epoxide	1024-57-3	0.053	(Pesticides and Herbicides) Table 2-2 Preliminary Screening Values
Alabama State	Kepone	143-50-0	0.061	(Pesticides and Herbicides) Table 2-2 Preliminary Screening Values
Alabama State	Malathion	121-75-5	120	(Pesticides and Herbicides) Table 2-2 Preliminary Screening Values
Alabama State	Methoxychlor	72-43-5	31	(Pesticides and Herbicides) Table 2-2 Preliminary Screening Values
Alabama State	Oxamyl (Vydate)	23135-22-0	150	(Pesticides and Herbicides) Table 2-2 Preliminary Screening Values
Alabama State	Phorate	298-02-2	1.2	(Pesticides and Herbicides) Table 2-2 Preliminary Screening Values
Alabama State	Picloram	1918-2-1	430	(Pesticides and Herbicides) Table 2-2 Preliminary Screening Values
Alabama State	Pronamide	23950-58-5	460	(Pesticides and Herbicides) Table 2-2 Preliminary Screening Values
Alabama State	Simazine	122-34-9	4.1	(Pesticides and Herbicides) Table 2-2 Preliminary Screening Values
Alabama State	Sulfotepp (Tetraethyldithiopyrophosphate)	3689-24-5	3.1	(Pesticides and Herbicides) Table 2-2 Preliminary Screening Values
Alabama State	2,4,5 TP (silvex) (2-(2,4,5-Trichlorophenoxy) propionic acid)	93-72-1	49	(Pesticides and Herbicides) Table 2-2 Preliminary Screening Values
Alabama State	Toxaphene	8001-35-2	0.44	(Pesticides and Herbicides) Table 2-2 Preliminary Screening Values
2. Alaska State	Aldrin	309-00-2	0.4	Arctic Zone Direct Contact
Alaska State	Bis(2-chloroethyl)ether	111-44-4	10	Arctic Zone Direct Contact
Alaska State	Chlordane	57-74-9	26	Arctic Zone Direct Contact
Alaska State	Chloroaniline, p-	106-47-8	130	Arctic Zone Direct Contact
Alaska State	Chlorophenol, 2-	95-57-8	680	Arctic Zone Direct Contact
Alaska State	4,4' - DDD	72-54-8	41	Arctic Zone Direct Contact
Alaska State	4,4' - DDE	72-55-9	29	Arctic Zone Direct Contact
Alaska State	4,4' - DDT	50-29-3	29	Arctic Zone Direct Contact
Alaska State	2,4-Dichlorophenoxyacetic acid (2,4-D)	94-75-7	1200	Arctic Zone Direct Contact
Alaska State	Dieldrin	60-57-1	0.43	Arctic Zone Direct Contact
Alaska State	Endosulfan	115-29-7	820	Arctic Zone Direct Contact
Alaska State	Endrin	72-20-8	2.7	Arctic Zone Direct Contact
Alaska State	Dibromoethane, 1,2-	106-93-4	5.6	Arctic Zone Direct Contact
Alaska State	Heptachlor	76-44-8	1.7	Arctic Zone Direct Contact
Alaska State	Heptachlor epoxide	1024-57-3	0.86	Arctic Zone Direct Contact
Alaska State	hexachloro-1,3-butadiene	87-68-3	18	Arctic Zone Direct Contact
Alaska State	HCH (alpha) (alpha - BHC)	319-84-6	1.6	Arctic Zone Direct Contact
Alaska State	HCH (beta) (beta - BHC)	319-85-7	5.5	Arctic Zone Direct Contact
Alaska State	HCH (gamma) Lindane (gamma - BHC)	58-89-9	7.6	Arctic Zone Direct Contact
Alaska State	Hexachlorocyclopentadiene	77-47-4	530	Arctic Zone Direct Contact
Alaska State	Methoxychlor	72-43-5	440	Arctic Zone Direct Contact
Alaska State	Bromomethane	74-83-9	190	Arctic Zone Direct Contact
Alaska State	Methyl Mercury	22967-92-6	10	Arctic Zone Direct Contact
Alaska State	Cresol, o-	95-48-7	4400	Arctic Zone Direct Contact
Alaska State	Cresol, m-	108-39-4	4400	Arctic Zone Direct Contact
Alaska State	Cresol, p-	106-44-5	480	Arctic Zone Direct Contact
Alaska State	Pentachlorophenol	87-86-5	52	Arctic Zone Direct Contact
Alaska State	Toxaphene	8001-35-2	10	Arctic Zone Direct Contact
Alaska State	2-(2,4,5-Trichlorophenoxy) propionic acid (2,4,5-TP)	93-72-1	700	Arctic Zone Direct Contact
Alaska State	Aldrin	309-00-2	0.3	Under 40 inch Zone Direct Contact
Alaska State	Bis(2-chloroethyl)ether	111-44-4	7.5	Under 40 inch Zone Direct Contact
Alaska State	Chlordane	57-74-9	19	Under 40 inch Zone Direct Contact
Alaska State	Chloroaniline, p-	106-47-8	90	Under 40 inch Zone Direct Contact
Alaska State	Chlorophenol, 2-	95-57-8	510	Under 40 inch Zone Direct Contact
Alaska State	4,4' - DDD	72-54-8	30	Under 40 inch Zone Direct Contact
Alaska State	4,4' - DDE	72-55-9	21	Under 40 inch Zone Direct Contact
Alaska State	4,4' - DDT	50-29-3	21	Under 40 inch Zone Direct Contact
Alaska State	2,4-Dichlorophenoxyacetic acid (2,4-D)	94-75-7	860	Under 40 inch Zone Direct Contact
Alaska State	Dieldrin	60-57-1	0.32	Under 40 inch Zone Direct Contact
Alaska State	Endosulfan	115-29-7	610	Under 40 inch Zone Direct Contact
Alaska State	Endrin	72-20-8	2	Under 40 inch Zone Direct Contact
Alaska State	Dibromoethane, 1,2-	106-93-4	4.2	Under 40 inch Zone Direct Contact
Alaska State	Heptachlor	76-44-8	1.3	Under 40 inch Zone Direct Contact
Alaska State	Heptachlor epoxide	1024-57-3	0.63	Under 40 inch Zone Direct Contact
Alaska State	hexachloro-1,3-butadiene	87-68-3	13	Under 40 inch Zone Direct Contact
Alaska State	HCH (alpha) (alpha - BHC)	319-84-6	1.2	Under 40 inch Zone Direct Contact
Alaska State	HCH (beta) (beta - BHC)	319-85-7	4	Under 40 inch Zone Direct Contact
Alaska State	HCH (gamma) Lindane (gamma - BHC)	58-89-9	5.6	Under 40 inch Zone Direct Contact
Alaska State	Hexachlorocyclopentadiene	77-47-4	390	Under 40 inch Zone Direct Contact
Alaska State	Methoxychlor	72-43-5	320	Under 40 inch Zone Direct Contact
Alaska State	Bromomethane	74-83-9	140	Under 40 inch Zone Direct Contact
Alaska State	Methyl Mercury	22967-92-6	7.7	Under 40 inch Zone Direct Contact
Alaska State	Cresol, o-	95-48-7	3200	Under 40 inch Zone Direct Contact
Alaska State	Cresol, m-	108-39-4	3200	Under 40 inch Zone Direct Contact
Alaska State	Cresol, p-	106-44-5	350	Under 40 inch Zone Direct Contact
Alaska State	Pentachlorophenol	87-86-5	39	Under 40 inch Zone Direct Contact
Alaska State	Toxaphene	8001-35-2	7.5	Under 40 inch Zone Direct Contact
Alaska State	2-(2,4,5-Trichlorophenoxy) propionic acid (2,4,5-TP)	93-72-1	520	Under 40 inch Zone Direct Contact
Alaska State	Aldrin	309-00-2	0.24	Over 40 inch Zone Direct Contact
Alaska State	Bis(2-chloroethyl)ether	111-44-4	6.2	Over 40 inch Zone Direct Contact
Alaska State	Chlordane	57-74-9	15	Over 40 inch Zone Direct Contact
Alaska State	Chloroaniline, p-	106-47-8	80	Over 40 inch Zone Direct Contact
Alaska State	Chlorophenol, 2-	95-57-8	410	Over 40 inch Zone Direct Contact
Alaska State	4,4' - DDD	72-54-8	25	Over 40 inch Zone Direct Contact
Alaska State	4,4' - DDE	72-55-9	18	Over 40 inch Zone Direct Contact
Alaska State	4,4' - DDT	50-29-3	18	Over 40 inch Zone Direct Contact
Alaska State	2,4-Dichlorophenoxyacetic acid (2,4-D)	94-75-7	710	Over 40 inch Zone Direct Contact
Alaska State	Dieldrin	60-57-1	0.26	Over 40 inch Zone Direct Contact
Alaska State	Endosulfan	115-29-7	500	Over 40 inch Zone Direct Contact
Alaska State	Endrin	72-20-8	1.7	Over 40 inch Zone Direct Contact
Alaska State	Dibromoethane, 1,2-	106-93-4	3.4	Over 40 inch Zone Direct Contact
Alaska State	Heptachlor	76-44-8	1	Over 40 inch Zone Direct Contact
Alaska State	Heptachlor epoxide	1024-57-3	0.52	Over 40 inch Zone Direct Contact
Alaska State	hexachloro-1,3-butadiene	87-68-3	11	Over 40 inch Zone Direct Contact
Alaska State	HCH (alpha) (alpha - BHC)	319-84-6	1	Over 40 inch Zone Direct Contact
Alaska State	HCH (beta) (beta - BHC)	319-85-7	3.3	Over 40 inch Zone Direct Contact
Alaska State	HCH (gamma) Lindane (gamma - BHC)	58-89-9	4.6	Over 40 inch Zone Direct Contact
Alaska State	Hexachlorocyclopentadiene	77-47-4	320	Over 40 inch Zone Direct Contact
Alaska State	Methoxychlor	72-43-5	270	Over 40 inch Zone Direct Contact
Alaska State	Bromomethane	74-83-9	120	Over 40 inch Zone Direct Contact
Alaska State	Methyl Mercury	22967-92-6	6.3	Over 40 inch Zone Direct Contact
Alaska State	Cresol, o-	95-48-7	2700	Over 40 inch Zone Direct Contact
Alaska State	Cresol, m-	108-39-4	2700	Over 40 inch Zone Direct Contact
Alaska State	Cresol, p-	106-44-5	290	Over 40 inch Zone Direct Contact
Alaska State	Pentachlorophenol	87-86-5	32	Over 40 inch Zone Direct Contact
Alaska State	Toxaphene	8001-35-2	6.2	Over 40 inch Zone Direct Contact
Alaska State	2-(2,4,5-Trichlorophenoxy) propionic acid (2,4,5-TP)	93-72-1	430	Over 40 inch Zone Direct Contact
3. Arizona State	Acephate	30560-19-1	63	Appendix A E-06 Risk
Arizona State	Alachlor	15972-60-8	6.8	Appendix A E-06 Risk
Arizona State	Aldrin	309-00-2	0.032	Appendix A E-06 Risk
Arizona State	Aniline	62-53-3	96	Appendix A E-06 Risk
Arizona State	Aramite	140-57-8	22	Appendix A E-06 Risk
Arizona State	Atrazine	1912-24-9	2.5	Appendix A E-06 Risk
Arizona State	Bis(2-chloroethyl)ether	111-44-4	0.23	Appendix A E-06 Risk
Arizona State	Captafol	2425-06-1	64	Appendix A E-06 Risk
Arizona State	Captan	133-06-2	160	Appendix A E-06 Risk
Arizona State	Chloranil	118-75-2	1.4	Appendix A E-06 Risk
Arizona State	Chlordane	12789-03-6	1.9	Appendix A E-06 Risk
Arizona State	Chlorothalonil	1897-45-6	50	Appendix A E-06 Risk
Arizona State	Crotonaldehyde	123-73-9	0.0053	Appendix A E-06 Risk
Arizona State	Cyanazine	21725-46-2	0.65	Appendix A E-06 Risk
Arizona State	4,4' - DDD	72-54-8	2.8	Appendix A E-06 Risk
Arizona State	4,4' - DDE	72-55-9	2	Appendix A E-06 Risk
Arizona State	4,4' - DDT	50-29-3	2	Appendix A E-06 Risk
Arizona State	Diallate	2303-16-4	9	Appendix A E-06 Risk
Arizona State	Dibromoethane, 1,2-	106-93-4	0.029	Appendix A E-06 Risk
Arizona State	Dichloropropane, 1,2-	78-87-5	3.4	Appendix A E-06 Risk
Arizona State	1,3-Dichloropropene	542-75-6	0.79	Appendix A E-06 Risk
Arizona State	Dichlorvos	62-73-7	1.9	Appendix A E-06 Risk
Arizona State	Dicofol	115-32-2	1.2	Appendix A E-06 Risk
Arizona State	Dieldrin	60-57-1	0.034	Appendix A E-06 Risk
Arizona State	Folpet	133-07-3	160	Appendix A E-06 Risk
Arizona State	Fomesafen	72178-02-0	2.9	Appendix A E-06 Risk
Arizona State	Furazolidone	67-45-8	0.14	Appendix A E-06 Risk
Arizona State	Furmecyclox	60568-05-0	18	Appendix A E-06 Risk
Arizona State	Heptachlor	76-44-8	0.12	Appendix A E-06 Risk
Arizona State	Heptachlor epoxide	1024-57-3	0.06	Appendix A E-06 Risk
Arizona State	hexachlorocyclobutadiene	87-69-3	7	Appendix A E-06 Risk
Arizona State	HCH (alpha) (alpha - BHC)	319-84-6	0.1	Appendix A E-06 Risk
Arizona State	HCH (beta) (beta - BHC)	319-85-7	0.36	Appendix A E-06 Risk
Arizona State	HCH (gamma) Lindane (gamma - BHC)	58-89-9	0.5	Appendix A E-06 Risk
Arizona State	HCH-technical	608-73-1	0.36	Appendix A E-06 Risk
Arizona State	Kepone	143-50-0	0.068	Appendix A E-06 Risk
Arizona State	Maneb	12427-38-2	9.1	Appendix A E-06 Risk
Arizona State	Mirex	2385-85-5	0.3	Appendix A E-06 Risk
Arizona State	Pentachloronitrobenzene	82-68-8	2.1	Appendix A E-06 Risk
Arizona State	Pentachlorophenol	87-86-5	3.2	Appendix A E-06 Risk
Arizona State	Prochloraz	67747-09-5	3.7	Appendix A E-06 Risk
Arizona State	Simazine	122-34-9	4.6	Appendix A E-06 Risk
Arizona State	Sodium Diethyldithiocarbamate	148-18-5	2	Appendix A E-06 Risk
Arizona State	Tetrachlorvinphos	961-11-5	23	Appendix A E-06 Risk
Arizona State	Toxaphene	8001-35-2	0.5	Appendix A E-06 Risk
Arizona State	Trifluralin	1582-09-8	71	Appendix A E-06 Risk
Arizona State	Acephate	30560-19-1	630	Appendix A E-05 Risk
Arizona State	Alachlor	15972-60-8	68	Appendix A E-05 Risk
Arizona State	Aldrin	309-00-2	0.32	Appendix A E-05 Risk
Arizona State	Aniline	62-53-3	960	Appendix A E-05 Risk
Arizona State	Aramite	140-57-8	220	Appendix A E-05 Risk
Arizona State	Atrazine	1912-24-9	25	Appendix A E-05 Risk
Arizona State	Bis(2-chloroethyl)ether	111-44-4	2.3	Appendix A E-05 Risk
Arizona State	Captafol	2425-06-1	640	Appendix A E-05 Risk
Arizona State	Captan	133-06-2	1600	Appendix A E-05 Risk
Arizona State	Chloranil	118-75-2	14	Appendix A E-05 Risk
Arizona State	Chlordane	12789-03-6	19	Appendix A E-05 Risk
Arizona State	Chlorothalonil	1897-45-6	500	Appendix A E-05 Risk
Arizona State	Crotonaldehyde	123-73-9	0.053	Appendix A E-05 Risk
Arizona State	Cyanazine	21725-46-2	6.5	Appendix A E-05 Risk
Arizona State	4,4' - DDD	72-54-8	28	Appendix A E-05 Risk
Arizona State	4,4' - DDE	72-55-9	20	Appendix A E-05 Risk
Arizona State	4,4' - DDT	50-29-3	20	Appendix A E-05 Risk
Arizona State	Diallate	2303-16-4	90	Appendix A E-05 Risk
Arizona State	Dibromoethane, 1,2-	106-93-4	0.29	Appendix A E-05 Risk
Arizona State	Dichloropropane, 1,2-	78-87-5	34	Appendix A E-05 Risk
Arizona State	1,3-Dichloropropene	542-75-6	7.9	Appendix A E-05 Risk
Arizona State	Dichlorvos	62-73-7	19	Appendix A E-05 Risk
Arizona State	Dicofol	115-32-2	12	Appendix A E-05 Risk
Arizona State	Dieldrin	60-57-1	0.34	Appendix A E-05 Risk
Arizona State	Folpet	133-07-3	1600	Appendix A E-05 Risk
Arizona State	Fomesafen	72178-02-0	29	Appendix A E-05 Risk
Arizona State	Furazolidone	67-45-8	1.4	Appendix A E-05 Risk
Arizona State	Furmecyclox	60568-05-0	180	Appendix A E-05 Risk
Arizona State	Heptachlor	76-44-8	1.2	Appendix A E-05 Risk
Arizona State	Heptachlor epoxide	1024-57-3	0.6	Appendix A E-05 Risk
Arizona State	hexachlorocyclobutadiene	87-69-3	70	Appendix A E-05 Risk
Arizona State	HCH (alpha) (alpha - BHC)	319-84-6	1	Appendix A E-05 Risk
Arizona State	HCH (beta) (beta - BHC)	319-85-7	3.6	Appendix A E-05 Risk
Arizona State	HCH (gamma) Lindane (gamma - BHC)	58-89-9	5	Appendix A E-05 Risk
Arizona State	HCH-technical	608-73-1	3.6	Appendix A E-05 Risk
Arizona State	Kepone	143-50-0	0.68	Appendix A E-05 Risk
Arizona State	Maneb	12427-38-2	91	Appendix A E-05 Risk
Arizona State	Mirex	2385-85-5	3	Appendix A E-05 Risk
Arizona State	Pentachloronitrobenzene	82-68-8	21	Appendix A E-05 Risk
Arizona State	Pentachlorophenol	87-86-5	32	Appendix A E-05 Risk
Arizona State	Prochloraz	67747-09-5	37	Appendix A E-05 Risk
Arizona State	Simazine	122-34-9	46	Appendix A E-05 Risk
Arizona State	Sodium Diethyldithiocarbamate	148-18-5	20	Appendix A E-05 Risk
Arizona State	Tetrachlorvinphos	961-11-5	230	Appendix A E-05 Risk
Arizona State	Toxaphene	8001-35-2	5	Appendix A E-05 Risk
Arizona State	Trifluralin	1582-09-8	710	Appendix A E-05 Risk
Arizona State	Acephate	30560-19-1	240	Appendix A Non-c
Arizona State	Acetochlor	34256-82-1	1200	Appendix A Non-c
Arizona State	Acrolein	107-02-8	0.1	Appendix A Non-c
Arizona State	Alar	1596-84-5	9200	Appendix A Non-c
Arizona State	Aldicarb	116-06-3	61	Appendix A Non-c
Arizona State	Aldicarb sulfone	1646-88-4	61	Appendix A Non-c
Arizona State	Ally	74223-64-6	15000	Appendix A Non-c
Arizona State	Aluminum Phosphide	20859-73-8	31	Appendix A Non-c
Arizona State	Amdro	67485-29-4	18	Appendix A Non-c
Arizona State	Ametryn	834-12-8	550	Appendix A Non-c
Arizona State	Amitraz	33089-61-1	150	Appendix A Non-c
Arizona State	Ammonium Sulfamate	7773-06-0	12000	Appendix A Non-c
Arizona State	Aniline	62-53-3	430	Appendix A Non-c
Arizona State	Apollo	74115-24-5	790	Appendix A Non-c
Arizona State	Assure	76578-14-8	550	Appendix A Non-c
Arizona State	Asulam	3337-71-1	3100	Appendix A Non-c
Arizona State	Avermectin B1	71751-41-2	24	Appendix A Non-c
Arizona State	Baygon	114-26-1	240	Appendix A Non-c
Arizona State	Bayleton	43121-43-3	1800	Appendix A Non-c
Arizona State	Baythroid	68359-37-5	1500	Appendix A Non-c
Arizona State	Benefin	1861-40-1	18000	Appendix A Non-c
Arizona State	Benomyl	17804-35-2	3100	Appendix A Non-c
Arizona State	Bentazon	25057-89-0	1800	Appendix A Non-c
Arizona State	Benzyl Alcohol	100-51-6	18000	Appendix A Non-c
Arizona State	Bidrin	141-66-2	6.1	Appendix A Non-c
Arizona State	Biphenthrin (Talstar)	82657-04-3	920	Appendix A Non-c
Arizona State	Bromomethane	74-83-9	3.9	Appendix A Non-c
Arizona State	Bromophos	2104-96-3	310	Appendix A Non-c
Arizona State	Bromoxynil	1689-84-5	1200	Appendix A Non-c
Arizona State	Bromoxynil octanoate	1689-99-2	1200	Appendix A Non-c
Arizona State	Captafol	2425-06-1	120	Appendix A Non-c
Arizona State	Carbaryl	63-25-2	6100	Appendix A Non-c
Arizona State	Carbofuran	1563-66-2	310	Appendix A Non-c
Arizona State	Carbosulfan	55285-14-8	610	Appendix A Non-c
Arizona State	Carboxin	5234-68-4	6100	Appendix A Non-c
Arizona State	Chloramben	133-90-4	920	Appendix A Non-c
Arizona State	Chlorimuron-ethyl	90982-32-4	1200	Appendix A Non-c
Arizona State	Chlorpropham	101-21-3	12000	Appendix A Non-c
Arizona State	Chlorpyrifos	2921-88-2	180	Appendix A Non-c
Arizona State	Chlorpyrifos-methyl	5598-13-0	610	Appendix A Non-c
Arizona State	Chlorsulfuron	64902-72-3	3100	Appendix A Non-c
Arizona State	Chlorthiophos	602-38-56-4	49	Appendix A Non-c
Arizona State	Cyanogen Bromide	506-68-3	290	Appendix A Non-c
Arizona State	Cypermethrin	52315-07-8	610	Appendix A Non-c
Arizona State	Cyromazine	66215-27-8	460	Appendix A Non-c
Arizona State	Dacthal	1861-32-1	610	Appendix A Non-c
Arizona State	Dalapon (2,2-dichloropropionic acid)(Sodium Salt)	75-99-0	1800	Appendix A Non-c
Arizona State	Danitol	39515-41-8	1500	Appendix A Non-c
Arizona State	Demeton	8065-48-3	2.4	Appendix A Non-c
Arizona State	Diazinon	333-41-5	55	Appendix A Non-c
Arizona State	Dicamba	1918-00-9	1800	Appendix A Non-c
Arizona State	4-(2,4-Dichlorophenoxy)butyric Acid (2,4-DB)	94-82-6	490	Appendix A Non-c
Arizona State	2,4-Dichlorophenoxyacetic Acid (2,4-D)	94-75-7	690	Appendix A Non-c
Arizona State	Difenzoquat (Avenge)	43222-48-6	4900	Appendix A Non-c
Arizona State	Diflubenzuron	35367-38-5	1200	Appendix A Non-c
Arizona State	Diisopropyl Methylphosphonate	1445-75-6	4900	Appendix A Non-c
Arizona State	Dimethipin	55290-64-7	1200	Appendix A Non-c
Arizona State	Dimethoate	60-51-5	12	Appendix A Non-c
Arizona State	Dinoseb	88-85-7	61	Appendix A Non-c
Arizona State	Diphenamid	957-51-7	1800	Appendix A Non-c
Arizona State	Diphenylamine	122-39-4	1500	Appendix A Non-c
Arizona State	Diquat	85-00-7	130	Appendix A Non-c
Arizona State	Disulfoton	298-04-4	2.4	Appendix A Non-c
Arizona State	Diuron	330-54-1	120	Appendix A Non-c
Arizona State	Dodine	2439-10-3	240	Appendix A Non-c
Arizona State	Endosulfan	115-29-7	370	Appendix A Non-c
Arizona State	Endothall	145-73-3	1200	Appendix A Non-c
Arizona State	Endrin	72-20-8	18	Appendix A Non-c
Arizona State	Epichlorohydrin	106-89-8	7.6	Appendix A Non-c
Arizona State	EPTC	759-94-4	1500	Appendix A Non-c
Arizona State	Ethephon (2-chloroethyl phosphonic acid)	16672-87-0	310	Appendix A Non-c
Arizona State	Ethion	563-12-2	31	Appendix A Non-c
Arizona State	Ethylene Diamine	107-15-3	5500	Appendix A Non-c
Arizona State	Ethyl-p-nitrophenyl Phosphonate	2104-64-5	0.61	Appendix A Non-c
Arizona State	Express	101200-48-0	490	Appendix A Non-c
Arizona State	Fenamiphos	22224-92-6	15	Appendix A Non-c
Arizona State	Fluometuron	2164-17-2	790	Appendix A Non-c
Arizona State	Fluoridone	59756-60-4	4900	Appendix A Non-c
Arizona State	Flurprimidol	56425-91-3	1200	Appendix A Non-c
Arizona State	Flutolanil	66332-96-5	3700	Appendix A Non-c
Arizona State	Fluvalinate	69409-94-5	610	Appendix A Non-c
Arizona State	Fonofos	944-22-9	120	Appendix A Non-c
Arizona State	Formic Acid	64-18-6	110000	Appendix A Non-c
Arizona State	Fosetyl-al	39148-24-8	180000	Appendix A Non-c
Arizona State	Furfural	98-01-1	180	Appendix A Non-c
Arizona State	Glufosinate-ammonium	77182-82-2	24	Appendix A Non-c
Arizona State	Glyphosate	1071-83-6	6100	Appendix A Non-c
Arizona State	Haloxyfop-methyl	69806-40-2	3.1	Appendix A Non-c
Arizona State	Harmony	79277-27-3	790	Appendix A Non-c
Arizona State	hexachlorocyclobutadiene	87-69-3	18	Appendix A Non-c
Arizona State	Hexachlorocyclopentadiene	77-47-4	370	Appendix A Non-c
Arizona State	Hexachlorophene	70-30-4	18	Appendix A Non-c
Arizona State	Hexazinone	51235-04-2	2020	Appendix A Non-c
Arizona State	Imazalil	35554-44-0	790	Appendix A Non-c
Arizona State	Imazaquin	81335-37-7	15000	Appendix A Non-c
Arizona State	Iprodione	36734-19-7	2400	Appendix A Non-c
Arizona State	Isopropalin	33820-53-0	920	Appendix A Non-c
Arizona State	Isoxaben	82558-50-7	3100	Appendix A Non-c
Arizona State	Lactofen	77501-63-4	120	Appendix A Non-c
Arizona State	Linuron	330-55-2	120	Appendix A Non-c
Arizona State	Londax	83055-99-6	12000	Appendix A Non-c
Arizona State	Malathion	121-75-5	1200	Appendix A Non-c
Arizona State	Maleic Anhydride	108-31-6	6100	Appendix A Non-c
Arizona State	Maleic Hydrazide	123-33-1	1700	Appendix A Non-c
Arizona State	Mancozeb	8018-01-7	1800	Appendix A Non-c
Arizona State	Mephosfolan	950-10-7	5.5	Appendix A Non-c
Arizona State	Mepiquat	24307-26-4	1800	Appendix A Non-c
Arizona State	Mercuric Chloride	7487-94-7	3300	Appendix A Non-c
Arizona State	Methyl Mercury	22967-92-6	6.1	Appendix A Non-c
Arizona State	Merphos	150-50-5	1.8	Appendix A Non-c
Arizona State	Merphos Oxide	78-48-8	1.8	Appendix A Non-c
Arizona State	Metalaxyl	57837-19-1	3700	Appendix A Non-c
Arizona State	Methamidophos	10265-92-6	3.1	Appendix A Non-c
Arizona State	Methidathion	950-37-8	61	Appendix A Non-c
Arizona State	Methomyl	16752-77-5	44	Appendix A Non-c
Arizona State	Methoxychlor	72-43-5	310	Appendix A Non-c
Arizona State	MCPA	94-74-6	31	Appendix A Non-c
Arizona State	MCPB	94-81-5	610	Appendix A Non-c
Arizona State	MCPP	93-65-2	61	Appendix A Non-c
Arizona State	MCPP-P	16484-77-8	61	Appendix A Non-c
Arizona State	Methyl parathion	298-00-0	15	Appendix A Non-c
Arizona State	Metolaclor (Dual)	51218-45-2	9200	Appendix A Non-c
Arizona State	Metribuzin	21087-64-9	1500	Appendix A Non-c
Arizona State	Molinate	2212-67-1	120	Appendix A Non-c
Arizona State	Naled	300-76-5	120	Appendix A Non-c
Arizona State	Napropamide	15299-99-7	6100	Appendix A Non-c
Arizona State	Nitrofurantoin	67-20-9	4300	Appendix A Non-c
Arizona State	Norflurazon	27314-13-2	2400	Appendix A Non-c
Arizona State	NuStar	85509-19-9	43	Appendix A Non-c
Arizona State	Oryzalin	19044-88-3	3100	Appendix A Non-c
Arizona State	Oxadiazon	19666-30-9	310	Appendix A Non-c
Arizona State	Oxamyl (Vydate)	23135-22-0	1500	Appendix A Non-c
Arizona State	Oxyfluorfen	42874-03-3	180	Appendix A Non-c
Arizona State	Paclobutrazol	76738-62-0	790	Appendix A Non-c
Arizona State	Paraquat	4685-14-7	270	Appendix A Non-c
Arizona State	Parathion	56-38-2	370	Appendix A Non-c
Arizona State	Pebulate	1114-71-2	3100	Appendix A Non-c
Arizona State	Pendimethalin	40487-42-1	2400	Appendix A Non-c
Arizona State	Permethrin	52645-53-1	3100	Appendix A Non-c
Arizona State	Phenmedipham	13684-63-4	15000	Appendix A Non-c
Arizona State	Phorate	298-02-2	12	Appendix A Non-c
Arizona State	Phosmet	732-11-6	1200	Appendix A Non-c
Arizona State	Phosphine	7803-51-2	18	Appendix A Non-c
Arizona State	Picloram	1918-2-1	4300	Appendix A Non-c
Arizona State	Pirimiphos-methyl	23505-41-1	610	Appendix A Non-c
Arizona State	Profluralin	26399-36-0	370	Appendix A Non-c
Arizona State	Prometon	1610-18-0	920	Appendix A Non-c
Arizona State	Prometryn	7287-19-6	240	Appendix A Non-c
Arizona State	Pronamide	23950-58-5	4600	Appendix A Non-c
Arizona State	Propachlor	1918-16-7	790	Appendix A Non-c
Arizona State	Propanil	709-98-8	310	Appendix A Non-c
Arizona State	Propargite	2312-35-8	1200	Appendix A Non-c
Arizona State	Propazine	139-40-2	1200	Appendix A Non-c
Arizona State	Propham	122-42-9	1200	Appendix A Non-c
Arizona State	Propiconazole	60207-90-1	790	Appendix A Non-c
Arizona State	Propylene glycol	57-55-6	30000	Appendix A Non-c
Arizona State	Pursuit	81335-77-5	15000	Appendix A Non-c
Arizona State	Pydrin	51630-58-1	1500	Appendix A Non-c
Arizona State	Pyridine	110-86-1	61	Appendix A Non-c
Arizona State	Quinalphos	13593-03-8	31	Appendix A Non-c
Arizona State	Resmethrin	10453-86-8	1800	Appendix A Non-c
Arizona State	Ronnel	299-84-3	3100	Appendix A Non-c
Arizona State	Rotenone	83-79-4	240	Appendix A Non-c
Arizona State	Savey	78587-05-0	1500	Appendix A Non-c
Arizona State	Sethoxydim	74051-80-2	5500	Appendix A Non-c
Arizona State	Sodium azide	26628-22-8	310	Appendix A Non-c
Arizona State	Sodium Fluoroacetate	62-74-8	1.2	Appendix A Non-c
Arizona State	Strychnine	57-24-9	18	Appendix A Non-c
Arizona State	Systhane	88671-89-0	1500	Appendix A Non-c
Arizona State	Tebuthiuron	34014-18-1	4300	Appendix A Non-c
Arizona State	Temephos	3383-96-8	1200	Appendix A Non-c
Arizona State	Terbacil	5902-51-2	790	Appendix A Non-c
Arizona State	Terbufos	13071-79-9	1.5	Appendix A Non-c
Arizona State	Terbutryn	886-50-0	61	Appendix A Non-c
Arizona State	Tetraethyldithiopyrophosphate	3689-24-5	31	Appendix A Non-c
Arizona State	Thiobencarb	28249-77-6	610	Appendix A Non-c
Arizona State	Thiofanox	39196-18-4	18	Appendix A Non-c
Arizona State	Thiophanate-methyl	23564-05-8	4900	Appendix A Non-c
Arizona State	Thiram	137-26-8	310	Appendix A Non-c
Arizona State	Tralomethrin	66841-25-6	460	Appendix A Non-c
Arizona State	Triallate	2303-17-5	790	Appendix A Non-c
Arizona State	Triasulfuron	82097-50-5	610	Appendix A Non-c
Arizona State	Trichlorophenoxyacetic Acid, 2,4,5-	93-76-5	610	Appendix A Non-c
Arizona State	2,4,5 TP (silvex) (2-(2,4,5-Trichlorophenoxy) propionic acid)	93-72-1	490	Appendix A Non-c
Arizona State	Tridiphane	58138-08-2	180	Appendix A Non-c
Arizona State	Trifluralin	1582-09-8	460	Appendix A Non-c
Arizona State	Vernam	1929-77-7	61	Appendix A Non-c
Arizona State	Vinclozolin	50471-44-8	1500	Appendix A Non-c
Arizona State	Warfarin	81-81-2	18	Appendix A Non-c
Arizona State	Zinc Phosphide	1314-84-7	23	Appendix A Non-c
Arizona State	Zineb	12122-67-7	3100	Appendix A Non-c
Arizona State	Acephate	30560-19-1	260	Appendix B. 1997 Soil Remediation Levels (SRL)
Arizona State	Acetochlor	34256-82-1	1300	Appendix B. 1997 Soil Remediation Levels (SRL)
Arizona State	Acifluorfen	62476-59-9	850	Appendix B. 1997 Soil Remediation Levels (SRL)
Arizona State	Acrolein	107-02-8	0.1	Appendix B. 1997 Soil Remediation Levels (SRL)
Arizona State	Alachlor	15972-60-8	55	Appendix B. 1997 Soil Remediation Levels (SRL)
Arizona State	Alar	1596-84-5	9800	Appendix B. 1997 Soil Remediation Levels (SRL)
Arizona State	Aldicarb	116-06-3	65	Appendix B. 1997 Soil Remediation Levels (SRL)
Arizona State	Aldicarb sulfone	1646-88-4	65	Appendix B. 1997 Soil Remediation Levels (SRL)
Arizona State	Aldrin	309-00-2	0.26	Appendix B. 1997 Soil Remediation Levels (SRL)
Arizona State	Ally	74223-64-6	16000	Appendix B. 1997 Soil Remediation Levels (SRL)
Arizona State	Aluminum Phosphide	20859-73-8	31	Appendix B. 1997 Soil Remediation Levels (SRL)
Arizona State	Amdro	67485-29-4	20	Appendix B. 1997 Soil Remediation Levels (SRL)
Arizona State	Ametryn	834-12-8	590	Appendix B. 1997 Soil Remediation Levels (SRL)
Arizona State	Amitraz	33089-61-1	160	Appendix B. 1997 Soil Remediation Levels (SRL)
Arizona State	Ammonium Sulfamate	7773-06-0	13000	Appendix B. 1997 Soil Remediation Levels (SRL)
Arizona State	Aniline	62-53-3	19	Appendix B. 1997 Soil Remediation Levels (SRL)
Arizona State	Antimony Potassium Tartrate	11071-15-1	69	Appendix B. 1997 Soil Remediation Levels (SRL)
Arizona State	Apollo	74115-24-5	850	Appendix B. 1997 Soil Remediation Levels (SRL)
Arizona State	Aramite	140-57-8	180	Appendix B. 1997 Soil Remediation Levels (SRL)
Arizona State	Assure	76578-14-8	590	Appendix B. 1997 Soil Remediation Levels (SRL)
Arizona State	Asulam	3337-71-1	3300	Appendix B. 1997 Soil Remediation Levels (SRL)
Arizona State	Atrazine	1912-24-9	20	Appendix B. 1997 Soil Remediation Levels (SRL)
Arizona State	Avermectin B1	71751-41-2	26	Appendix B. 1997 Soil Remediation Levels (SRL)
Arizona State	Baygon	114-26-1	260	Appendix B. 1997 Soil Remediation Levels (SRL)
Arizona State	Bayleton	43121-43-3	2000	Appendix B. 1997 Soil Remediation Levels (SRL)
Arizona State	Baythroid	68359-37-5	1600	Appendix B. 1997 Soil Remediation Levels (SRL)
Arizona State	Benefin	1861-40-1	20000	Appendix B. 1997 Soil Remediation Levels (SRL)
Arizona State	Benomyl	17804-35-2	3300	Appendix B. 1997 Soil Remediation Levels (SRL)
Arizona State	Bentazon	25057-89-0	160	Appendix B. 1997 Soil Remediation Levels (SRL)
Arizona State	Benzyl Alcohol	100-51-6	20000	Appendix B. 1997 Soil Remediation Levels (SRL)
Arizona State	Bidrin	141-66-2	6.5	Appendix B. 1997 Soil Remediation Levels (SRL)
Arizona State	Biphenthrin (Talstar)	82657-04-3	980	Appendix B. 1997 Soil Remediation Levels (SRL)
Arizona State	Bis(2-chloroethyl)ether	111-44-4	0.43	Appendix B. 1997 Soil Remediation Levels (SRL)
Arizona State	Bromomethane	74-83-9	6.8	Appendix B. 1997 Soil Remediation Levels (SRL)
Arizona State	Bromophos	2104-96-3	330	Appendix B. 1997 Soil Remediation Levels (SRL)
Arizona State	Bromoxynil	1689-84-5	1300	Appendix B. 1997 Soil Remediation Levels (SRL)
Arizona State	Bromoxynil octanoate	1689-99-2	1300	Appendix B. 1997 Soil Remediation Levels (SRL)
Arizona State	Captafol	2425-06-1	130	Appendix B. 1997 Soil Remediation Levels (SRL)
Arizona State	Captan	133-06-2	1300	Appendix B. 1997 Soil Remediation Levels (SRL)
Arizona State	Carbaryl	63-25-2	6500	Appendix B. 1997 Soil Remediation Levels (SRL)
Arizona State	Carbofuran	1563-66-2	330	Appendix B. 1997 Soil Remediation Levels (SRL)
Arizona State	Carbosulfan	55285-14-8	650	Appendix B. 1997 Soil Remediation Levels (SRL)
Arizona State	Carboxin	5234-68-4	6500	Appendix B. 1997 Soil Remediation Levels (SRL)
Arizona State	Chloramben	133-90-4	980	Appendix B. 1997 Soil Remediation Levels (SRL)
Arizona State	Chloranil	118-75-2	11	Appendix B. 1997 Soil Remediation Levels (SRL)
Arizona State	Chlordane	12789-03-6	3.4	Appendix B. 1997 Soil Remediation Levels (SRL)
Arizona State	Chlorimuron-ethyl	90982-32-4	1300	Appendix B. 1997 Soil Remediation Levels (SRL)
Arizona State	Chlorothalonil	1897-45-6	400	Appendix B. 1997 Soil Remediation Levels (SRL)
Arizona State	Chlorobenzilate	510-15-6	16	Appendix B. 1997 Soil Remediation Levels (SRL)
Arizona State	Chlorpropham	101-21-3	13000	Appendix B. 1997 Soil Remediation Levels (SRL)
Arizona State	Chlorpyrifos	2921-88-2	200	Appendix B. 1997 Soil Remediation Levels (SRL)
Arizona State	Chlorpyrifos-methyl	5598-13-0	650	Appendix B. 1997 Soil Remediation Levels (SRL)
Arizona State	Chlorsulfuron	64902-72-3	3300	Appendix B. 1997 Soil Remediation Levels (SRL)
Arizona State	Chlorthiophos	602-38-56-4	52	Appendix B. 1997 Soil Remediation Levels (SRL)
Arizona State	Crotonaldehyde	123-73-9	0.052	Appendix B. 1997 Soil Remediation Levels (SRL)
Arizona State	Cyanazine	21725-46-2	5.3	Appendix B. 1997 Soil Remediation Levels (SRL)
Arizona State	Cyanogen Bromide	506-68-3	5900	Appendix B. 1997 Soil Remediation Levels (SRL)
Arizona State	Cyhalothrin/Karate	68085-85-8	330	Appendix B. 1997 Soil Remediation Levels (SRL)
Arizona State	Cypermethrin	52315-07-8	650	Appendix B. 1997 Soil Remediation Levels (SRL)
Arizona State	Cyromazine	66215-27-8	490	Appendix B. 1997 Soil Remediation Levels (SRL)
Arizona State	Dacthal	1861-32-1	650	Appendix B. 1997 Soil Remediation Levels (SRL)
Arizona State	Dalapon (2,2-dichloropropionic acid)(Sodium Salt)	75-99-0	2000	Appendix B. 1997 Soil Remediation Levels (SRL)
Arizona State	Danitol	39515-41-8	1600	Appendix B. 1997 Soil Remediation Levels (SRL)
Arizona State	4,4' - DDD	72-54-8	19	Appendix B. 1997 Soil Remediation Levels (SRL)
Arizona State	4,4' - DDE	72-55-9	13	Appendix B. 1997 Soil Remediation Levels (SRL)
Arizona State	4,4' - DDT	50-29-3	13	Appendix B. 1997 Soil Remediation Levels (SRL)
Arizona State	Demeton	8065-48-3	2.6	Appendix B. 1997 Soil Remediation Levels (SRL)
Arizona State	Diallate	2303-16-4	73	Appendix B. 1997 Soil Remediation Levels (SRL)
Arizona State	Diazinon	333-41-5	59	Appendix B. 1997 Soil Remediation Levels (SRL)
Arizona State	Dibromoethane, 1,2-	106-93-4	0.049	Appendix B. 1997 Soil Remediation Levels (SRL)
Arizona State	Dicamba	1918-00-9	2000	Appendix B. 1997 Soil Remediation Levels (SRL)
Arizona State	4-(2,4-Dichlorophenoxy)butyric Acid (2,4-DB)	94-82-6	520	Appendix B. 1997 Soil Remediation Levels (SRL)
Arizona State	2,4-Dichlorophenoxyacetic Acid (2,4-D)	94-75-7	650	Appendix B. 1997 Soil Remediation Levels (SRL)
Arizona State	Dichloropropane, 1,2-	78-87-5	3.1	Appendix B. 1997 Soil Remediation Levels (SRL)
Arizona State	1,3-Dichloropropene	542-75-6	2.4	Appendix B. 1997 Soil Remediation Levels (SRL)
Arizona State	Dichlorvos	62-73-7	15	Appendix B. 1997 Soil Remediation Levels (SRL)
Arizona State	Dicofol	115-32-2	10	Appendix B. 1997 Soil Remediation Levels (SRL)
Arizona State	Dieldrin	60-57-1	0.28	Appendix B. 1997 Soil Remediation Levels (SRL)
Arizona State	Difenzoquat (Avenge)	43222-48-6	5200	Appendix B. 1997 Soil Remediation Levels (SRL)
Arizona State	Diflubenzuron	35367-38-5	1300	Appendix B. 1997 Soil Remediation Levels (SRL)
Arizona State	Diisopropyl Methylphosphonate	1445-75-6	5200	Appendix B. 1997 Soil Remediation Levels (SRL)
Arizona State	Dimethipin	55290-64-7	1300	Appendix B. 1997 Soil Remediation Levels (SRL)
Arizona State	Dimethoate	60-51-5	13	Appendix B. 1997 Soil Remediation Levels (SRL)
Arizona State	Dinoseb	88-85-7	65	Appendix B. 1997 Soil Remediation Levels (SRL)
Arizona State	Diphenamid	957-51-7	2000	Appendix B. 1997 Soil Remediation Levels (SRL)
Arizona State	Diphenylamine	122-39-4	1600	Appendix B. 1997 Soil Remediation Levels (SRL)
Arizona State	Diquat	85-00-7	140	Appendix B. 1997 Soil Remediation Levels (SRL)
Arizona State	Disulfoton	298-04-4	2.6	Appendix B. 1997 Soil Remediation Levels (SRL)
Arizona State	Diuron	330-54-1	130	Appendix B. 1997 Soil Remediation Levels (SRL)
Arizona State	Dodine	2439-10-3	260	Appendix B. 1997 Soil Remediation Levels (SRL)
Arizona State	Endosulfan	115-29-7	390	Appendix B. 1997 Soil Remediation Levels (SRL)
Arizona State	Endothall	145-73-3	1300	Appendix B. 1997 Soil Remediation Levels (SRL)
Arizona State	Endrin	72-20-8	20	Appendix B. 1997 Soil Remediation Levels (SRL)
Arizona State	Epichlorohydrin	106-89-8	7.5	Appendix B. 1997 Soil Remediation Levels (SRL)
Arizona State	EPTC	759-94-4	1600	Appendix B. 1997 Soil Remediation Levels (SRL)
Arizona State	Ethephon (2-chloroethyl phosphonic acid)	16672-87-0	330	Appendix B. 1997 Soil Remediation Levels (SRL)
Arizona State	Ethion	563-12-2	33	Appendix B. 1997 Soil Remediation Levels (SRL)
Arizona State	Ethylene Diamine	107-15-3	1300	Appendix B. 1997 Soil Remediation Levels (SRL)
Arizona State	Ethyl-p-nitrophenyl Phosphonate	2104-64-5	0.65	Appendix B. 1997 Soil Remediation Levels (SRL)
Arizona State	Express	101200-48-0	520	Appendix B. 1997 Soil Remediation Levels (SRL)
Arizona State	Fenamiphos	22224-92-6	16	Appendix B. 1997 Soil Remediation Levels (SRL)
Arizona State	Fluometuron	2164-17-2	850	Appendix B. 1997 Soil Remediation Levels (SRL)
Arizona State	Fluoridone	59756-60-4	5200	Appendix B. 1997 Soil Remediation Levels (SRL)
Arizona State	Flurprimidol	56425-91-3	1300	Appendix B. 1997 Soil Remediation Levels (SRL)
Arizona State	Flutolanil	66332-96-5	3900	Appendix B. 1997 Soil Remediation Levels (SRL)
Arizona State	Fluvalinate	69409-94-5	650	Appendix B. 1997 Soil Remediation Levels (SRL)
Arizona State	Folpet	133-07-3	1300	Appendix B. 1997 Soil Remediation Levels (SRL)
Arizona State	Fomesafen	72178-02-0	23	Appendix B. 1997 Soil Remediation Levels (SRL)
Arizona State	Fonofos	944-22-9	130	Appendix B. 1997 Soil Remediation Levels (SRL)
Arizona State	Formic Acid	64-18-6	130000	Appendix B. 1997 Soil Remediation Levels (SRL)
Arizona State	Fosetyl-al	39148-24-8	200000	Appendix B. 1997 Soil Remediation Levels (SRL)
Arizona State	Furazolidone	67-45-8	1.2	Appendix B. 1997 Soil Remediation Levels (SRL)
Arizona State	Furfural	98-01-1	200	Appendix B. 1997 Soil Remediation Levels (SRL)
Arizona State	Furmecyclox	60568-05-0	150	Appendix B. 1997 Soil Remediation Levels (SRL)
Arizona State	Glufosinate-ammonium	77182-82-2	26	Appendix B. 1997 Soil Remediation Levels (SRL)
Arizona State	Glyphosate	1071-83-6	6500	Appendix B. 1997 Soil Remediation Levels (SRL)
Arizona State	Haloxyfop-methyl	69806-40-2	3.3	Appendix B. 1997 Soil Remediation Levels (SRL)
Arizona State	Harmony	79277-27-3	850	Appendix B. 1997 Soil Remediation Levels (SRL)
Arizona State	Heptachlor	76-44-8	0.99	Appendix B. 1997 Soil Remediation Levels (SRL)
Arizona State	Heptachlor epoxide	1024-57-3	0.49	Appendix B. 1997 Soil Remediation Levels (SRL)
Arizona State	hexachlorocyclobutadiene	87-69-3	13	Appendix B. 1997 Soil Remediation Levels (SRL)
Arizona State	HCH (alpha) (alpha - BHC)	319-84-6	0.71	Appendix B. 1997 Soil Remediation Levels (SRL)
Arizona State	HCH (beta) (beta - BHC)	319-85-7	2.5	Appendix B. 1997 Soil Remediation Levels (SRL)
Arizona State	HCH (gamma) Lindane (gamma - BHC)	58-89-9	3.4	Appendix B. 1997 Soil Remediation Levels (SRL)
Arizona State	HCH-technical	608-73-1	2.5	Appendix B. 1997 Soil Remediation Levels (SRL)
Arizona State	Hexachlorocyclopentadiene	77-47-4	450	Appendix B. 1997 Soil Remediation Levels (SRL)
Arizona State	Hexachlorophene	70-30-4	20	Appendix B. 1997 Soil Remediation Levels (SRL)
Arizona State	Hexazinone	51235-04-2	2200	Appendix B. 1997 Soil Remediation Levels (SRL)
Arizona State	Imazalil	35554-44-0	850	Appendix B. 1997 Soil Remediation Levels (SRL)
Arizona State	Imazaquin	81335-37-7	16000	Appendix B. 1997 Soil Remediation Levels (SRL)
Arizona State	Iprodione	36734-19-7	2600	Appendix B. 1997 Soil Remediation Levels (SRL)
Arizona State	Isopropalin	33820-53-0	980	Appendix B. 1997 Soil Remediation Levels (SRL)
Arizona State	Isoxaben	82558-50-7	3300	Appendix B. 1997 Soil Remediation Levels (SRL)
Arizona State	Kepone	143-50-0	0.25	Appendix B. 1997 Soil Remediation Levels (SRL)
Arizona State	Lactofen	77501-63-4	130	Appendix B. 1997 Soil Remediation Levels (SRL)
Arizona State	Linuron	330-55-2	130	Appendix B. 1997 Soil Remediation Levels (SRL)
Arizona State	Londax	83055-99-6	13000	Appendix B. 1997 Soil Remediation Levels (SRL)
Arizona State	Malathion	121-75-5	1300	Appendix B. 1997 Soil Remediation Levels (SRL)
Arizona State	Maleic Anhydride	108-31-6	6500	Appendix B. 1997 Soil Remediation Levels (SRL)
Arizona State	Maleic Hydrazide	123-33-1	33000	Appendix B. 1997 Soil Remediation Levels (SRL)
Arizona State	Mancozeb	8018-01-7	2000	Appendix B. 1997 Soil Remediation Levels (SRL)
Arizona State	Maneb	12427-38-2	330	Appendix B. 1997 Soil Remediation Levels (SRL)
Arizona State	Mephosfolan	950-10-7	5.9	Appendix B. 1997 Soil Remediation Levels (SRL)
Arizona State	Mepiquat	24307-26-4	2000	Appendix B. 1997 Soil Remediation Levels (SRL)
Arizona State	Mercuric Chloride	7487-94-7	23	Appendix B. 1997 Soil Remediation Levels (SRL)
Arizona State	Methyl Mercury	22967-92-6	6.5	Appendix B. 1997 Soil Remediation Levels (SRL)
Arizona State	Merphos	150-50-5	2	Appendix B. 1997 Soil Remediation Levels (SRL)
Arizona State	Merphos Oxide	78-48-8	2	Appendix B. 1997 Soil Remediation Levels (SRL)
Arizona State	Metalaxyl	57837-19-1	3900	Appendix B. 1997 Soil Remediation Levels (SRL)
Arizona State	Methamidophos	10265-92-6	3.3	Appendix B. 1997 Soil Remediation Levels (SRL)
Arizona State	Methidathion	950-37-8	6.5	Appendix B. 1997 Soil Remediation Levels (SRL)
Arizona State	Methomyl	16752-77-5	1600	Appendix B. 1997 Soil Remediation Levels (SRL)
Arizona State	Methoxychlor	72-43-5	330	Appendix B. 1997 Soil Remediation Levels (SRL)
Arizona State	MCPA	94-74-6	33	Appendix B. 1997 Soil Remediation Levels (SRL)
Arizona State	MCPB	94-81-5	650	Appendix B. 1997 Soil Remediation Levels (SRL)
Arizona State	MCPP	93-65-2	65	Appendix B. 1997 Soil Remediation Levels (SRL)
Arizona State	MCPP-P	16484-77-8	65	Appendix B. 1997 Soil Remediation Levels (SRL)
Arizona State	Methyl parathion	298-00-0	16	Appendix B. 1997 Soil Remediation Levels (SRL)
Arizona State	Metolaclor (Dual)	51218-45-2	9800	Appendix B. 1997 Soil Remediation Levels (SRL)
Arizona State	Metribuzin	21087-64-9	1600	Appendix B. 1997 Soil Remediation Levels (SRL)
Arizona State	Mirex	2385-85-5	2.5	Appendix B. 1997 Soil Remediation Levels (SRL)
Arizona State	Molinate	2212-67-1	130	Appendix B. 1997 Soil Remediation Levels (SRL)
Arizona State	Naled	300-76-5	130	Appendix B. 1997 Soil Remediation Levels (SRL)
Arizona State	Napropamide	15299-99-7	6500	Appendix B. 1997 Soil Remediation Levels (SRL)
Arizona State	Nitrapyrin	1929-82-4	98	Appendix B. 1997 Soil Remediation Levels (SRL)
Arizona State	Nitrofurantoin	67-20-9	4600	Appendix B. 1997 Soil Remediation Levels (SRL)
Arizona State	Norflurazon	27314-13-2	2600	Appendix B. 1997 Soil Remediation Levels (SRL)
Arizona State	NuStar	85509-19-9	46	Appendix B. 1997 Soil Remediation Levels (SRL)
Arizona State	Oryzalin	19044-88-3	3300	Appendix B. 1997 Soil Remediation Levels (SRL)
Arizona State	Oxadiazon	19666-30-9	330	Appendix B. 1997 Soil Remediation Levels (SRL)
Arizona State	Oxamyl (Vydate)	23135-22-0	1600	Appendix B. 1997 Soil Remediation Levels (SRL)
Arizona State	Oxyfluorfen	42874-03-3	200	Appendix B. 1997 Soil Remediation Levels (SRL)
Arizona State	Paclobutrazol	76738-62-0	850	Appendix B. 1997 Soil Remediation Levels (SRL)
Arizona State	Paraquat	4685-14-7	290	Appendix B. 1997 Soil Remediation Levels (SRL)
Arizona State	Parathion	56-38-2	390	Appendix B. 1997 Soil Remediation Levels (SRL)
Arizona State	Pebulate	1114-71-2	3300	Appendix B. 1997 Soil Remediation Levels (SRL)
Arizona State	Pendimethalin	40487-42-1	2600	Appendix B. 1997 Soil Remediation Levels (SRL)
Arizona State	Pentachloronitrobenzene	82-68-8	17	Appendix B. 1997 Soil Remediation Levels (SRL)
Arizona State	Pentachlorophenol	87-86-5	25	Appendix B. 1997 Soil Remediation Levels (SRL)
Arizona State	Permethrin	52645-53-1	3300	Appendix B. 1997 Soil Remediation Levels (SRL)
Arizona State	Phenmedipham	13684-63-4	16000	Appendix B. 1997 Soil Remediation Levels (SRL)
Arizona State	Phorate	298-02-2	13	Appendix B. 1997 Soil Remediation Levels (SRL)
Arizona State	Phosmet	732-11-6	1300	Appendix B. 1997 Soil Remediation Levels (SRL)
Arizona State	Phosphine	7803-51-2	20	Appendix B. 1997 Soil Remediation Levels (SRL)
Arizona State	Picloram	1918-2-1	4600	Appendix B. 1997 Soil Remediation Levels (SRL)
Arizona State	Pirimiphos-methyl	23505-41-1	650	Appendix B. 1997 Soil Remediation Levels (SRL)
Arizona State	Potassium Silver Cyanide	506-61-6	13000	Appendix B. 1997 Soil Remediation Levels (SRL)
Arizona State	Prochloraz	67747-09-5	3	Appendix B. 1997 Soil Remediation Levels (SRL)
Arizona State	Profluralin	26399-36-0	390	Appendix B. 1997 Soil Remediation Levels (SRL)
Arizona State	Prometon	1610-18-0	980	Appendix B. 1997 Soil Remediation Levels (SRL)
Arizona State	Prometryn	7287-19-6	260	Appendix B. 1997 Soil Remediation Levels (SRL)
Arizona State	Pronamide	23950-58-5	4900	Appendix B. 1997 Soil Remediation Levels (SRL)
Arizona State	Propachlor	1918-16-7	850	Appendix B. 1997 Soil Remediation Levels (SRL)
Arizona State	Propanil	709-98-8	330	Appendix B. 1997 Soil Remediation Levels (SRL)
Arizona State	Propargite	2312-35-8	1300	Appendix B. 1997 Soil Remediation Levels (SRL)
Arizona State	Propazine	139-40-2	1300	Appendix B. 1997 Soil Remediation Levels (SRL)
Arizona State	Propham	122-42-9	1300	Appendix B. 1997 Soil Remediation Levels (SRL)
Arizona State	Propiconazole	60207-90-1	850	Appendix B. 1997 Soil Remediation Levels (SRL)
Arizona State	Propylene glycol	57-55-6	1000000	Appendix B. 1997 Soil Remediation Levels (SRL)
Arizona State	Pursuit	81335-77-5	16000	Appendix B. 1997 Soil Remediation Levels (SRL)
Arizona State	Pydrin	51630-58-1	1600	Appendix B. 1997 Soil Remediation Levels (SRL)
Arizona State	Pyridine	110-86-1	65	Appendix B. 1997 Soil Remediation Levels (SRL)
Arizona State	Quinalphos	13593-03-8	33	Appendix B. 1997 Soil Remediation Levels (SRL)
Arizona State	Resmethrin	10453-86-8	2000	Appendix B. 1997 Soil Remediation Levels (SRL)
Arizona State	Ronnel	299-84-3	3300	Appendix B. 1997 Soil Remediation Levels (SRL)
Arizona State	Rotenone	83-79-4	260	Appendix B. 1997 Soil Remediation Levels (SRL)
Arizona State	Sethoxydim	74051-80-2	5900	Appendix B. 1997 Soil Remediation Levels (SRL)
Arizona State	Simazine	122-34-9	37	Appendix B. 1997 Soil Remediation Levels (SRL)
Arizona State	Sodium azide	26628-22-8	260	Appendix B. 1997 Soil Remediation Levels (SRL)
Arizona State	Sodium cyanide	143-33-9	2600	Appendix B. 1997 Soil Remediation Levels (SRL)
Arizona State	Sodium Diethyldithiocarbamate	148-18-5	16	Appendix B. 1997 Soil Remediation Levels (SRL)
Arizona State	Sodium Fluoroacetate	62-74-8	1.3	Appendix B. 1997 Soil Remediation Levels (SRL)
Arizona State	Strychnine	57-24-9	20	Appendix B. 1997 Soil Remediation Levels (SRL)
Arizona State	Systhane	88671-89-0	1600	Appendix B. 1997 Soil Remediation Levels (SRL)
Arizona State	Tebuthiuron	34014-18-1	4600	Appendix B. 1997 Soil Remediation Levels (SRL)
Arizona State	Temephos	3383-96-8	1300	Appendix B. 1997 Soil Remediation Levels (SRL)
Arizona State	Terbacil	5902-51-2	850	Appendix B. 1997 Soil Remediation Levels (SRL)
Arizona State	Terbufos	13071-79-9	1.6	Appendix B. 1997 Soil Remediation Levels (SRL)
Arizona State	Terbutryn	886-50-0	65	Appendix B. 1997 Soil Remediation Levels (SRL)
Arizona State	Tetrachlorvinphos	961-11-5	190	Appendix B. 1997 Soil Remediation Levels (SRL)
Arizona State	Tetraethyldithiopyrophosphate	3689-24-5	33	Appendix B. 1997 Soil Remediation Levels (SRL)
Arizona State	Thallium Sulfate	7446-18-6	6.1	Appendix B. 1997 Soil Remediation Levels (SRL)
Arizona State	Thiobencarb	28249-77-6	650	Appendix B. 1997 Soil Remediation Levels (SRL)
Arizona State	Thiofanox	39196-18-4	20	Appendix B. 1997 Soil Remediation Levels (SRL)
Arizona State	Thiophanate-methyl	23564-05-8	5200	Appendix B. 1997 Soil Remediation Levels (SRL)
Arizona State	Thiram	137-26-8	330	Appendix B. 1997 Soil Remediation Levels (SRL)
Arizona State	Toxaphene	8001-35-2	4	Appendix B. 1997 Soil Remediation Levels (SRL)
Arizona State	Tralomethrin	66841-25-6	490	Appendix B. 1997 Soil Remediation Levels (SRL)
Arizona State	Triallate	2303-17-5	850	Appendix B. 1997 Soil Remediation Levels (SRL)
Arizona State	Triasulfuron	82097-50-5	650	Appendix B. 1997 Soil Remediation Levels (SRL)
Arizona State	Trichlorophenoxyacetic Acid, 2,4,5-	93-76-5	650	Appendix B. 1997 Soil Remediation Levels (SRL)
Arizona State	2,4,5 TP (silvex) (2-(2,4,5-Trichlorophenoxy) propionic acid)	93-72-1	520	Appendix B. 1997 Soil Remediation Levels (SRL)
Arizona State	Tridiphane	58138-08-2	200	Appendix B. 1997 Soil Remediation Levels (SRL)
Arizona State	Trifluralin	1582-09-8	490	Appendix B. 1997 Soil Remediation Levels (SRL)
Arizona State	Vernam	1929-77-7	65	Appendix B. 1997 Soil Remediation Levels (SRL)
Arizona State	Vinclozolin	50471-44-8	1600	Appendix B. 1997 Soil Remediation Levels (SRL)
Arizona State	Warfarin	81-81-2	20	Appendix B. 1997 Soil Remediation Levels (SRL)
Arizona State	Zinc Phosphide	1314-84-7	23	Appendix B. 1997 Soil Remediation Levels (SRL)
Arizona State	Zineb	12122-67-7	3300	Appendix B. 1997 Soil Remediation Levels (SRL)
Arizona State	2-Methyl phenol (o-cresol)	95-48-7	1300	Table 6.1.2.a. Tier 1 Clean-up Standards
4. Arkansas State	Mercuric Chloride	7487-94-7	23.5	Table 2. Lab Remediation Cleanup Standards
Arkansas State	Phosphine	7803-51-2	18.3	Table 2. Lab Remediation Cleanup Standards
Arkansas State	Pydrin	51630-58-1	61.1	Table 2. Lab Remediation Cleanup Standards
Arkansas State	Acephate	30560-19-1	24	HQ=0.1 EPA
Arkansas State	Acetochlor	34256-82-1	120	HQ=0.1 EPA
Arkansas State	Acetylaminofluorene, 2-	53-96-3	0.13	HQ=0.1 EPA
Arkansas State	Acrolein	107-02-8	0.015	HQ=0.1 EPA
Arkansas State	Alachlor	15972-60-8	8.7	HQ=0.1 EPA
Arkansas State	ALAR	1596-84-5	27	HQ=0.1 EPA
Arkansas State	Aldicarb	116-06-3	6.1	HQ=0.1 EPA
Arkansas State	Aldicarb Sulfone	1646-88-4	6.1	HQ=0.1 EPA
Arkansas State	Aldrin	309-00-2	0.029	HQ=0.1 EPA
Arkansas State	Ally	74223-64-6	1500	HQ=0.1 EPA
Arkansas State	Aluminum Phosphide	20859-73-8	3.1	HQ=0.1 EPA
Arkansas State	Amdro	67485-29-4	1.8	HQ=0.1 EPA
Arkansas State	Ametryn	834-12-8	55	HQ=0.1 EPA
Arkansas State	Amitraz	33089-61-1	15	HQ=0.1 EPA
Arkansas State	Ammonium Sulfamate	7773-06-0	1600	HQ=0.1 EPA
Arkansas State	Antimony Potassium Tartrate	11071-15-1	7	HQ=0.1 EPA
Arkansas State	Apollo	74115-24-5	79	HQ=0.1 EPA
Arkansas State	Aramite	140-57-8	19	HQ=0.1 EPA
Arkansas State	Arsine	7784-42-1	0.027	HQ=0.1 EPA
Arkansas State	Assure	76578-14-8	55	HQ=0.1 EPA
Arkansas State	Asulam	3337-71-1	310	HQ=0.1 EPA
Arkansas State	Atrazine	1912-24-9	2.1	HQ=0.1 EPA
Arkansas State	Auramine	492-80-8	0.55	HQ=0.1 EPA
Arkansas State	Avermectin B1	65195-55-3	2.4	HQ=0.1 EPA
Arkansas State	Azobenzene	103-33-3	5.1	HQ=0.1 EPA
Arkansas State	Baygon	114-26-1	24	HQ=0.1 EPA
Arkansas State	Bayleton	43121-43-3	180	HQ=0.1 EPA
Arkansas State	Baythroid	68359-37-5	150	HQ=0.1 EPA
Arkansas State	Benefin	1861-40-1	1800	HQ=0.1 EPA
Arkansas State	Benomyl	17804-35-2	310	HQ=0.1 EPA
Arkansas State	Bentazon	25057-89-0	180	HQ=0.1 EPA
Arkansas State	Benzyl Alcohol	100-51-6	610	HQ=0.1 EPA
Arkansas State	Bidrin	141-66-2	0.61	HQ=0.1 EPA
Arkansas State	Bifenox	42576-02-3	55	HQ=0.1 EPA
Arkansas State	Biphenthrin	82657-04-3	92	HQ=0.1 EPA
Arkansas State	Bis(2-chloroethyl)ether	111-44-4	0.21	HQ=0.1 EPA
Arkansas State	Bromo-2-chloroethane, 1-	107-04-0	0.024	HQ=0.1 EPA
Arkansas State	Bromomethane	74-83-9	0.73	HQ=0.1 EPA
Arkansas State	Bromophos	2104-96-3	31	HQ=0.1 EPA
Arkansas State	Bromoxynil	1689-84-5	120	HQ=0.1 EPA
Arkansas State	Bromoxynil Octanoate	1689-99-2	120	HQ=0.1 EPA
Arkansas State	Butylate	2008-41-5	310	HQ=0.1 EPA
Arkansas State	Cacodylic Acid	75-60-5	120	HQ=0.1 EPA
Arkansas State	Captafol	2425-06-1	3.2	HQ=0.1 EPA
Arkansas State	Captan	133-06-2	210	HQ=0.1 EPA
Arkansas State	Carbaryl	63-25-2	610	HQ=0.1 EPA
Arkansas State	Carbofuran	1563-66-2	31	HQ=0.1 EPA
Arkansas State	Carbosulfan	55285-14-8	61	HQ=0.1 EPA
Arkansas State	Carboxin	5234-68-4	610	HQ=0.1 EPA
Arkansas State	Chloramben	133-90-4	92	HQ=0.1 EPA
Arkansas State	Chloranil	118-75-2	1.2	HQ=0.1 EPA
Arkansas State	Chlordane	12789-03-6	1.6	HQ=0.1 EPA
Arkansas State	Chlordecone (Kepone)	143-50-0	0.049	HQ=0.1 EPA
Arkansas State	Chlorfenvinphos	470-90-6	4.3	HQ=0.1 EPA
Arkansas State	Chlorimuron, Ethyl	90982-32-4	120	HQ=0.1 EPA
Arkansas State	Chloro-2-methylaniline, 4-	95-69-2	4.9	HQ=0.1 EPA
Arkansas State	Chloroaniline, p-	106-47-8	2.4	HQ=0.1 EPA
Arkansas State	Chlorobenzilate	510-15-6	4.4	HQ=0.1 EPA
Arkansas State	Chloronitrobenzene, o-	88-73-3	1.6	HQ=0.1 EPA
Arkansas State	Chloronitrobenzene, p-	100-00-5	6.1	HQ=0.1 EPA
Arkansas State	Chloropicrin	76-06-2	0.21	HQ=0.1 EPA
Arkansas State	Chlorothalonil	1897-45-6	92	HQ=0.1 EPA
Arkansas State	Chlorotoluene, o-	95-49-8	160	HQ=0.1 EPA
Arkansas State	Chlorozotocin	54749-90-5	0.002	HQ=0.1 EPA
Arkansas State	Chlorpropham	101-21-3	1200	HQ=0.1 EPA
Arkansas State	Chlorpyrifos	2921-88-2	6.1	HQ=0.1 EPA
Arkansas State	Chlorpyrifos Methyl	5598-13-0	61	HQ=0.1 EPA
Arkansas State	Chlorsulfuron	64902-72-3	310	HQ=0.1 EPA
Arkansas State	Chlorthiophos	60238-56-4	4.9	HQ=0.1 EPA
Arkansas State	Cresol, m-	108-39-4	310	HQ=0.1 EPA
Arkansas State	Cresol, o	95-48-7	310	HQ=0.1 EPA
Arkansas State	Cresol, p	106-44-5	610	HQ=0.1 EPA
Arkansas State	Cresol, p-chloro-m-	59-50-7	610	HQ=0.1 EPA
Arkansas State	Cresols	1319-77-3	610	HQ=0.1 EPA
Arkansas State	Cyanazine	21725-46-2	0.58	HQ=0.1 EPA
Arkansas State	Cyanogen Bromide	506-68-3	700	HQ=0.1 EPA
Arkansas State	Cyanogen Chloride	506-77-4	390	HQ=0.1 EPA
Arkansas State	Cyhalothrin/karate	68085-85-8	31	HQ=0.1 EPA
Arkansas State	Cypermethrin	52315-07-8	61	HQ=0.1 EPA
Arkansas State	Cyromazine	66215-27-8	46	HQ=0.1 EPA
Arkansas State	Dacthal	1861-32-1	61	HQ=0.1 EPA
Arkansas State	Dalapon	75-99-0	180	HQ=0.1 EPA
Arkansas State	DDD	72-54-8	2	HQ=0.1 EPA
Arkansas State	DDE, p,p'-	72-55-9	1.4	HQ=0.1 EPA
Arkansas State	DDT	50-29-3	1.7	HQ=0.1 EPA
Arkansas State	Demeton	8065-48-3	0.24	HQ=0.1 EPA
Arkansas State	Diallate	2303-16-4	8	HQ=0.1 EPA
Arkansas State	Diazinon	333-41-5	4.3	HQ=0.1 EPA
Arkansas State	Dibromo-3-chloropropane, 1,2-	96-12-8	0.0054	HQ=0.1 EPA
Arkansas State	Dibromobenzene, 1,4-	106-37-6	61	HQ=0.1 EPA
Arkansas State	Dibromoethane, 1,2-	106-93-4	0.034	HQ=0.1 EPA
Arkansas State	Dicamba	1918-00-9	180	HQ=0.1 EPA
Arkansas State	Dichloroacetic Acid	79-43-6	9.7	HQ=0.1 EPA
Arkansas State	Dichlorobenzophenone, 4,4'-	90-98-2	55	HQ=0.1 EPA
Arkansas State	Dichlorophenoxy Acetic Acid, 2,4-	94-75-7	69	HQ=0.1 EPA
Arkansas State	Dichlorophenoxy)butyric Acid, 4-	94-82-6	49	HQ=0.1 EPA
Arkansas State	Dichloropropane, 1,2-	78-87-5	0.94	HQ=0.1 EPA
Arkansas State	Dichloropropene, 1,3-	542-75-6	1.7	HQ=0.1 EPA
Arkansas State	Dichlorvos	62-73-7	1.7	HQ=0.1 EPA
Arkansas State	Dieldrin	60-57-1	0.03	HQ=0.1 EPA
Arkansas State	Diethylformamide	617-84-5	6.1	HQ=0.1 EPA
Arkansas State	Diethylstilbestrol	56-53-1	0.0014	HQ=0.1 EPA
Arkansas State	Difenzoquat	43222-48-6	490	HQ=0.1 EPA
Arkansas State	Diflubenzuron	35367-38-5	120	HQ=0.1 EPA
Arkansas State	Diisopropyl Methylphosphonate	1445-75-6	630	HQ=0.1 EPA
Arkansas State	Dimethipin	55290-64-7	120	HQ=0.1 EPA
Arkansas State	Dimethoate	60-51-5	1.2	HQ=0.1 EPA
Arkansas State	Dimethylaniline HCl, 2,4-	21436-96-4	0.84	HQ=0.1 EPA
Arkansas State	Dimethylaniline, 2,4-	95-68-1	2.4	HQ=0.1 EPA
Arkansas State	Dinitro-o-cresol, 4,6-	534-52-1	0.49	HQ=0.1 EPA
Arkansas State	Dinoseb	88-85-7	6.1	HQ=0.1 EPA
Arkansas State	Diphenamid	957-51-7	180	HQ=0.1 EPA
Arkansas State	Diphenylamine	122-39-4	150	HQ=0.1 EPA
Arkansas State	Diquat	85-00-7	13	HQ=0.1 EPA
Arkansas State	Disulfoton	298-04-4	0.24	HQ=0.1 EPA
Arkansas State	Diuron	330-54-1	12	HQ=0.1 EPA
Arkansas State	Dodine	2439-10-3	24	HQ=0.1 EPA
Arkansas State	Endosulfan	115-29-7	37	HQ=0.1 EPA
Arkansas State	Endothall	145-73-3	120	HQ=0.1 EPA
Arkansas State	Endrin	72-20-8	1.8	HQ=0.1 EPA
Arkansas State	EPTC	759-94-4	200	HQ=0.1 EPA
Arkansas State	Ethephon	16672-87-0	31	HQ=0.1 EPA
Arkansas State	Ethion	563-12-2	3.1	HQ=0.1 EPA
Arkansas State	Ethylene Diamine	107-15-3	550	HQ=0.1 EPA
Arkansas State	Ethyl-p-nitrophenyl Phosphonate	2104-64-5	0.061	HQ=0.1 EPA
Arkansas State	Express	101200-48-0	49	HQ=0.1 EPA
Arkansas State	Fenamiphos	22224-92-6	1.5	HQ=0.1 EPA
Arkansas State	Fenpropathrin	39515-41-8	150	HQ=0.1 EPA
Arkansas State	Fluometuron	2164-17-2	79	HQ=0.1 EPA
Arkansas State	Fluridone	59756-60-4	490	HQ=0.1 EPA
Arkansas State	Flurprimidol	56425-91-3	120	HQ=0.1 EPA
Arkansas State	Flutolanil	66332-96-5	370	HQ=0.1 EPA
Arkansas State	Fluvalinate	69409-94-5	61	HQ=0.1 EPA
Arkansas State	Folpet	133-07-3	140	HQ=0.1 EPA
Arkansas State	Fomesafen	72178-02-0	2.6	HQ=0.1 EPA
Arkansas State	Fonofos	944-22-9	12	HQ=0.1 EPA
Arkansas State	Formaldehyde	50-00-0	1200	HQ=0.1 EPA
Arkansas State	Formic Acid	64-18-6	4900	HQ=0.1 EPA
Arkansas State	Fosetyl-AL	39148-24-8	18000	HQ=0.1 EPA
Arkansas State	Furazolidone	67-45-8	0.13	HQ=0.1 EPA
Arkansas State	Furium	531-82-8	0.32	HQ=0.1 EPA
Arkansas State	Furmecyclox	60568-05-0	16	HQ=0.1 EPA
Arkansas State	Glufosinate, Ammonium	77182-82-2	2.4	HQ=0.1 EPA
Arkansas State	Glutaraldehyde	111-30-8	11000	HQ=0.1 EPA
Arkansas State	Glyphosate	1071-83-6	610	HQ=0.1 EPA
Arkansas State	Goal	42874-03-3	18	HQ=0.1 EPA
Arkansas State	Guthion	86-50-0	18	HQ=0.1 EPA
Arkansas State	Haloxyfop, Methyl	69806-40-2	0.31	HQ=0.1 EPA
Arkansas State	Harmony	79277-27-3	79	HQ=0.1 EPA
Arkansas State	Heptachlor	76-44-8	0.11	HQ=0.1 EPA
Arkansas State	Heptachlor Epoxide	1024-57-3	0.053	HQ=0.1 EPA
Arkansas State	Hexachlorocyclohexane, Alpha-	319-84-6	0.077	HQ=0.1 EPA
Arkansas State	Hexachlorocyclohexane, Beta-	319-85-7	0.27	HQ=0.1 EPA
Arkansas State	Hexachlorocyclohexane, Gamma- (Lindane)	58-89-9	0.52	HQ=0.1 EPA
Arkansas State	Hexachlorocyclohexane, Technical	608-73-1	0.27	HQ=0.1 EPA
Arkansas State	Hexachlorocyclopentadiene	77-47-4	37	HQ=0.1 EPA
Arkansas State	Hexachlorophene (germicidal soaps)	70-30-4	1.8	HQ=0.1 EPA
Arkansas State	Hexazinone	51235-04-2	200	HQ=0.1 EPA
Arkansas State	Hydrogen Cyanide	74-90-8	2.3	HQ=0.1 EPA
Arkansas State	Imazalil	35554-44-0	79	HQ=0.1 EPA
Arkansas State	Imazaquin	81335-37-7	1500	HQ=0.1 EPA
Arkansas State	Iprodione	36734-19-7	240	HQ=0.1 EPA
Arkansas State	Isopropalin	33820-53-0	92	HQ=0.1 EPA
Arkansas State	Isopropyl Methyl Phosphonic Acid	1832-54-8	610	HQ=0.1 EPA
Arkansas State	Isoxaben	82558-50-7	310	HQ=0.1 EPA
Arkansas State	Kerb	23950-58-5	460	HQ=0.1 EPA
Arkansas State	Lactofen	77501-63-4	12	HQ=0.1 EPA
Arkansas State	Linuron	330-55-2	12	HQ=0.1 EPA
Arkansas State	Londax	83055-99-6	1200	HQ=0.1 EPA
Arkansas State	Malathion	121-75-5	120	HQ=0.1 EPA
Arkansas State	Maleic Anhydride	108-31-6	610	HQ=0.1 EPA
Arkansas State	Maleic Hydrazide	123-33-1	3100	HQ=0.1 EPA
Arkansas State	Mancozeb	8018-01-7	180	HQ=0.1 EPA
Arkansas State	Maneb	12427-38-2	31	HQ=0.1 EPA
Arkansas State	MCPA	94-74-6	3.1	HQ=0.1 EPA
Arkansas State	MCPB	94-81-5	61	HQ=0.1 EPA
Arkansas State	MCPP	93-65-2	6.1	HQ=0.1 EPA
Arkansas State	Mephosfolan	950-10-7	0.55	HQ=0.1 EPA
Arkansas State	Mepiquat Chloride	24307-26-4	180	HQ=0.1 EPA
Arkansas State	Mercuric Chloride	7487-94-7	2.3	HQ=0.1 EPA
Arkansas State	Merphos	150-50-5	0.18	HQ=0.1 EPA
Arkansas State	Merphos Oxide (AKA Tribufos)	78-48-8	0.18	HQ=0.1 EPA
Arkansas State	Metalaxyl	57837-19-1	370	HQ=0.1 EPA
Arkansas State	Methamidophos	10265-92-6	0.31	HQ=0.1 EPA
Arkansas State	Methidathion	950-37-8	6.1	HQ=0.1 EPA
Arkansas State	Methomyl	16752-77-5	150	HQ=0.1 EPA
Arkansas State	Methoxychlor	72-43-5	31	HQ=0.1 EPA
Arkansas State	Methyl Isocyanate	624-83-9	0.5	HQ=0.1 EPA
Arkansas State	Methyl Mercury	22967-92-6	0.78	HQ=0.1 EPA
Arkansas State	Methyl Parathion	298-00-0	1.5	HQ=0.1 EPA
Arkansas State	Methylarsonic acid	124-58-3	61	HQ=0.1 EPA
Arkansas State	Methylcholanthrene, 3-	56-49-5	0.0052	HQ=0.1 EPA
Arkansas State	Methylnaphthalene, 1-	90-12-0	1.6	HQ=0.1 EPA
Arkansas State	Methylnaphthalene, 2-	91-57-6	23	HQ=0.1 EPA
Arkansas State	Metolachlor	51218-45-2	920	HQ=0.1 EPA
Arkansas State	Metribuzin	21087-64-9	150	HQ=0.1 EPA
Arkansas State	Mirex	2385-85-5	0.027	HQ=0.1 EPA
Arkansas State	Molinate	2212-67-1	12	HQ=0.1 EPA
Arkansas State	Naled	300-76-5	12	HQ=0.1 EPA
Arkansas State	Napropamide	15299-99-7	610	HQ=0.1 EPA
Arkansas State	Nitrofurantoin	67-20-9	430	HQ=0.1 EPA
Arkansas State	Norflurazon	27314-13-2	240	HQ=0.1 EPA
Arkansas State	Nustar	85509-19-9	4.3	HQ=0.1 EPA
Arkansas State	Octamethylpyrophosphoramide	152-16-9	12	HQ=0.1 EPA
Arkansas State	Oryzalin	19044-88-3	310	HQ=0.1 EPA
Arkansas State	Oxadiazon	19666-30-9	31	HQ=0.1 EPA
Arkansas State	Oxamyl	23135-22-0	150	HQ=0.1 EPA
Arkansas State	Paclobutrazol	76738-62-0	79	HQ=0.1 EPA
Arkansas State	Paraquat Dichloride	1910-42-5	27	HQ=0.1 EPA
Arkansas State	Parathion	56-38-2	37	HQ=0.1 EPA
Arkansas State	Pebulate	1114-71-2	310	HQ=0.1 EPA
Arkansas State	Pendimethalin	40487-42-1	240	HQ=0.1 EPA
Arkansas State	Pentachloronitrobenzene	82-68-8	1.9	HQ=0.1 EPA
Arkansas State	Pentachlorophenol	87-86-5	0.89	HQ=0.1 EPA
Arkansas State	Permethrin	52645-53-1	310	HQ=0.1 EPA
Arkansas State	Phenacetin	62-44-2	220	HQ=0.1 EPA
Arkansas State	Phenmedipham	13684-63-4	1500	HQ=0.1 EPA
Arkansas State	Phenol	108-95-2	1800	HQ=0.1 EPA
Arkansas State	Phenylmercuric Acetate	62-38-4	0.49	HQ=0.1 EPA
Arkansas State	Phorate	298-02-2	1.2	HQ=0.1 EPA
Arkansas State	Phosgene	75-44-5	0.033	HQ=0.1 EPA
Arkansas State	Phosmet	732-11-6	120	HQ=0.1 EPA
Arkansas State	Phosphine	7803-51-2	2.3	HQ=0.1 EPA
Arkansas State	Picloram	1918-02-1	430	HQ=0.1 EPA
Arkansas State	Pirimiphos, Methyl	29232-93-7	61	HQ=0.1 EPA
Arkansas State	Potassium Silver Cyanide	506-61-6	39	HQ=0.1 EPA
Arkansas State	Prochloraz	67747-09-5	3.2	HQ=0.1 EPA
Arkansas State	Profluralin	26399-36-0	37	HQ=0.1 EPA
Arkansas State	Prometon	1610-18-0	92	HQ=0.1 EPA
Arkansas State	Prometryn	7287-19-6	24	HQ=0.1 EPA
Arkansas State	Propachlor	1918-16-7	79	HQ=0.1 EPA
Arkansas State	Propanil	709-98-8	31	HQ=0.1 EPA
Arkansas State	Propargite	2312-35-8	120	HQ=0.1 EPA
Arkansas State	Propargyl Alcohol	107-19-7	12	HQ=0.1 EPA
Arkansas State	Propazine	139-40-2	120	HQ=0.1 EPA
Arkansas State	Propham	122-42-9	120	HQ=0.1 EPA
Arkansas State	Propiconazole	60207-90-1	79	HQ=0.1 EPA
Arkansas State	Propylene Glycol	57-55-6	120000	HQ=0.1 EPA
Arkansas State	Propylene Oxide	75-56-9	2	HQ=0.1 EPA
Arkansas State	Pursuit	81335-77-5	1500	HQ=0.1 EPA
Arkansas State	Pydrin	51630-58-1	150	HQ=0.1 EPA
Arkansas State	Pyridine	110-86-1	7.8	HQ=0.1 EPA
Arkansas State	Quinalphos	13593-03-8	3.1	HQ=0.1 EPA
Arkansas State	Resmethrin	10453-86-8	180	HQ=0.1 EPA
Arkansas State	Ronnel	299-84-3	310	HQ=0.1 EPA
Arkansas State	Rotenone	83-79-4	24	HQ=0.1 EPA
Arkansas State	Safrole	94-59-7	0.52	HQ=0.1 EPA
Arkansas State	Savey	78587-05-0	150	HQ=0.1 EPA
Arkansas State	Selenium Sulfide	7446-34-6	39	HQ=0.1 EPA
Arkansas State	Sethoxydim	74051-80-2	550	HQ=0.1 EPA
Arkansas State	Simazine	122-34-9	4.1	HQ=0.1 EPA
Arkansas State	Sodium Acifluorfen	62476-59-9	79	HQ=0.1 EPA
Arkansas State	Sodium Azide	26628-22-8	31	HQ=0.1 EPA
Arkansas State	Sodium Diethyldithiocarbamate	148-18-5	1.8	HQ=0.1 EPA
Arkansas State	Sodium Fluoride	7681-49-4	390	HQ=0.1 EPA
Arkansas State	Sodium Fluoroacetate	62-74-8	0.12	HQ=0.1 EPA
Arkansas State	Stirofos (Tetrachlorovinphos)	961-11-5	20	HQ=0.1 EPA
Arkansas State	Strychnine	57-24-9	1.8	HQ=0.1 EPA
Arkansas State	Systhane	88671-89-0	150	HQ=0.1 EPA
Arkansas State	TCMTB	21564-17-0	180	HQ=0.1 EPA
Arkansas State	Tebuthiuron	34014-18-1	430	HQ=0.1 EPA
Arkansas State	Temephos	3383-96-8	120	HQ=0.1 EPA
Arkansas State	Terbacil	5902-51-2	79	HQ=0.1 EPA
Arkansas State	Terbufos	13071-79-9	0.15	HQ=0.1 EPA
Arkansas State	Terbutryn	886-50-0	6.1	HQ=0.1 EPA
Arkansas State	Tetraethyl Dithiopyrophosphate	3689-24-5	3.1	HQ=0.1 EPA
Arkansas State	Thallium Sulfate	7446-18-6	0.16	HQ=0.1 EPA
Arkansas State	Thiobencarb	28249-77-6	61	HQ=0.1 EPA
Arkansas State	Thiofanox	39196-18-4	1.8	HQ=0.1 EPA
Arkansas State	Thiophanate, Methyl	23564-05-8	490	HQ=0.1 EPA
Arkansas State	Thiram	137-26-8	31	HQ=0.1 EPA
Arkansas State	Toxaphene	8001-35-2	0.44	HQ=0.1 EPA
Arkansas State	Tralomethrin	66841-25-6	46	HQ=0.1 EPA
Arkansas State	Triallate	2303-17-5	79	HQ=0.1 EPA
Arkansas State	Triasulfuron	82097-50-5	61	HQ=0.1 EPA
Arkansas State	Tribromobenzene, 1,2,4-	615-54-3	31	HQ=0.1 EPA
Arkansas State	Tributyltin Compounds	NA	1.8	HQ=0.1 EPA
Arkansas State	Tributyltin Oxide	56-35-9	1.8	HQ=0.1 EPA
Arkansas State	Trichlorophenoxyacetic Acid, 2,4,5-	93-76-5	61	HQ=0.1 EPA
Arkansas State	Trichlorophenoxypropionic acid, -2,4,5	93-72-1	49	HQ=0.1 EPA
Arkansas State	Tridiphane	58138-08-2	18	HQ=0.1 EPA
Arkansas State	Trifluralin	1582-09-8	46	HQ=0.1 EPA
Arkansas State	Vernolate	1929-77-7	6.1	HQ=0.1 EPA
Arkansas State	Vinclozolin	50471-44-8	150	HQ=0.1 EPA
Arkansas State	Warfarin	81-81-2	1.8	HQ=0.1 EPA
Arkansas State	Zinc Phosphide	1314-84-7	2.3	HQ=0.1 EPA
Arkansas State	Zineb	12122-67-7	310	HQ=0.1 EPA
Arkansas State	Acephate	30560-19-1	56	HQ=1 EPA
Arkansas State	Acetochlor	34256-82-1	1200	HQ=1 EPA
Arkansas State	Acetylaminofluorene, 2-	53-96-3	0.13	HQ=1 EPA
Arkansas State	Acrolein	107-02-8	0.15	HQ=1 EPA
Arkansas State	Alachlor	15972-60-8	8.7	HQ=1 EPA
Arkansas State	ALAR	1596-84-5	27	HQ=1 EPA
Arkansas State	Aldicarb	116-06-3	61	HQ=1 EPA
Arkansas State	Aldicarb Sulfone	1646-88-4	61	HQ=1 EPA
Arkansas State	Aldrin	309-00-2	0.029	HQ=1 EPA
Arkansas State	Ally	74223-64-6	15000	HQ=1 EPA
Arkansas State	Aluminum Phosphide	20859-73-8	31	HQ=1 EPA
Arkansas State	Amdro	67485-29-4	18	HQ=1 EPA
Arkansas State	Ametryn	834-12-8	550	HQ=1 EPA
Arkansas State	Amitraz	33089-61-1	150	HQ=1 EPA
Arkansas State	Ammonium Sulfamate	7773-06-0	16000	HQ=1 EPA
Arkansas State	Antimony Potassium Tartrate	11071-15-1	70	HQ=1 EPA
Arkansas State	Apollo	74115-24-5	790	HQ=1 EPA
Arkansas State	Aramite	140-57-8	19	HQ=1 EPA
Arkansas State	Arsine	7784-42-1	0.27	HQ=1 EPA
Arkansas State	Assure	76578-14-8	550	HQ=1 EPA
Arkansas State	Asulam	3337-71-1	3100	HQ=1 EPA
Arkansas State	Atrazine	1912-24-9	2.1	HQ=1 EPA
Arkansas State	Auramine	492-80-8	0.55	HQ=1 EPA
Arkansas State	Avermectin B1	65195-55-3	24	HQ=1 EPA
Arkansas State	Azobenzene	103-33-3	5.1	HQ=1 EPA
Arkansas State	Baygon	114-26-1	240	HQ=1 EPA
Arkansas State	Bayleton	43121-43-3	1800	HQ=1 EPA
Arkansas State	Baythroid	68359-37-5	1500	HQ=1 EPA
Arkansas State	Benefin	1861-40-1	18000	HQ=1 EPA
Arkansas State	Benomyl	17804-35-2	3100	HQ=1 EPA
Arkansas State	Bentazon	25057-89-0	1800	HQ=1 EPA
Arkansas State	Benzyl Alcohol	100-51-6	6100	HQ=1 EPA
Arkansas State	Bidrin	141-66-2	6.1	HQ=1 EPA
Arkansas State	Bifenox	42576-02-3	550	HQ=1 EPA
Arkansas State	Biphenthrin	82657-04-3	920	HQ=1 EPA
Arkansas State	Bis(2-chloroethyl)ether	111-44-4	0.21	HQ=1 EPA
Arkansas State	Bromo-2-chloroethane, 1-	107-04-0	0.024	HQ=1 EPA
Arkansas State	Bromomethane	74-83-9	7.3	HQ=1 EPA
Arkansas State	Bromophos	2104-96-3	310	HQ=1 EPA
Arkansas State	Bromoxynil	1689-84-5	1200	HQ=1 EPA
Arkansas State	Bromoxynil Octanoate	1689-99-2	1200	HQ=1 EPA
Arkansas State	Butylate	2008-41-5	3100	HQ=1 EPA
Arkansas State	Cacodylic Acid	75-60-5	1200	HQ=1 EPA
Arkansas State	Captafol	2425-06-1	3.2	HQ=1 EPA
Arkansas State	Captan	133-06-2	210	HQ=1 EPA
Arkansas State	Carbaryl	63-25-2	6100	HQ=1 EPA
Arkansas State	Carbofuran	1563-66-2	310	HQ=1 EPA
Arkansas State	Carbosulfan	55285-14-8	610	HQ=1 EPA
Arkansas State	Carboxin	5234-68-4	6100	HQ=1 EPA
Arkansas State	Chloramben	133-90-4	920	HQ=1 EPA
Arkansas State	Chloranil	118-75-2	1.2	HQ=1 EPA
Arkansas State	Chlordane	12789-03-6	1.6	HQ=1 EPA
Arkansas State	Chlordecone (Kepone)	143-50-0	0.049	HQ=1 EPA
Arkansas State	Chlorfenvinphos	470-90-6	43	HQ=1 EPA
Arkansas State	Chlorimuron, Ethyl	90982-32-4	1200	HQ=1 EPA
Arkansas State	Chloro-2-methylaniline, 4-	95-69-2	4.9	HQ=1 EPA
Arkansas State	Chloroaniline, p-	106-47-8	2.4	HQ=1 EPA
Arkansas State	Chlorobenzilate	510-15-6	4.4	HQ=1 EPA
Arkansas State	Chloronitrobenzene, o-	88-73-3	1.6	HQ=1 EPA
Arkansas State	Chloronitrobenzene, p-	100-00-5	61	HQ=1 EPA
Arkansas State	Chloropicrin	76-06-2	2.1	HQ=1 EPA
Arkansas State	Chlorothalonil	1897-45-6	160	HQ=1 EPA
Arkansas State	Chlorotoluene, o-	95-49-8	1600	HQ=1 EPA
Arkansas State	Chlorozotocin	54749-90-5	0.002	HQ=1 EPA
Arkansas State	Chlorpropham	101-21-3	12000	HQ=1 EPA
Arkansas State	Chlorpyrifos	2921-88-2	61	HQ=1 EPA
Arkansas State	Chlorpyrifos Methyl	5598-13-0	610	HQ=1 EPA
Arkansas State	Chlorsulfuron	64902-72-3	3100	HQ=1 EPA
Arkansas State	Chlorthiophos	60238-56-4	49	HQ=1 EPA
Arkansas State	Cresol, m-	108-39-4	3100	HQ=1 EPA
Arkansas State	Cresol, o	95-48-7	3100	HQ=1 EPA
Arkansas State	Cresol, p	106-44-5	6100	HQ=1 EPA
Arkansas State	Cresol, p-chloro-m-	59-50-7	6100	HQ=1 EPA
Arkansas State	Cresols	1319-77-3	6100	HQ=1 EPA
Arkansas State	Cyanazine	21725-46-2	0.58	HQ=1 EPA
Arkansas State	Cyanogen Bromide	506-68-3	7000	HQ=1 EPA
Arkansas State	Cyanogen Chloride	506-77-4	3900	HQ=1 EPA
Arkansas State	Cyhalothrin/karate	68085-85-8	310	HQ=1 EPA
Arkansas State	Cypermethrin	52315-07-8	610	HQ=1 EPA
Arkansas State	Cyromazine	66215-27-8	460	HQ=1 EPA
Arkansas State	Dacthal	1861-32-1	610	HQ=1 EPA
Arkansas State	Dalapon	75-99-0	1800	HQ=1 EPA
Arkansas State	DDD	72-54-8	2	HQ=1 EPA
Arkansas State	DDE, p,p'-	72-55-9	1.4	HQ=1 EPA
Arkansas State	DDT	50-29-3	1.7	HQ=1 EPA
Arkansas State	Demeton	8065-48-3	2.4	HQ=1 EPA
Arkansas State	Diallate	2303-16-4	8	HQ=1 EPA
Arkansas State	Diazinon	333-41-5	43	HQ=1 EPA
Arkansas State	Dibromo-3-chloropropane, 1,2-	96-12-8	0.0054	HQ=1 EPA
Arkansas State	Dibromobenzene, 1,4-	106-37-6	610	HQ=1 EPA
Arkansas State	Dibromoethane, 1,2-	106-93-4	0.034	HQ=1 EPA
Arkansas State	Dicamba	1918-00-9	1800	HQ=1 EPA
Arkansas State	Dichloroacetic Acid	79-43-6	9.7	HQ=1 EPA
Arkansas State	Dichlorobenzophenone, 4,4'-	90-98-2	550	HQ=1 EPA
Arkansas State	Dichlorophenoxy Acetic Acid, 2,4-	94-75-7	690	HQ=1 EPA
Arkansas State	Dichlorophenoxy)butyric Acid, 4-	94-82-6	490	HQ=1 EPA
Arkansas State	Dichloropropane, 1,2-	78-87-5	0.94	HQ=1 EPA
Arkansas State	Dichloropropene, 1,3-	542-75-6	1.7	HQ=1 EPA
Arkansas State	Dichlorvos	62-73-7	1.7	HQ=1 EPA
Arkansas State	Dieldrin	60-57-1	0.03	HQ=1 EPA
Arkansas State	Diethylformamide	617-84-5	61	HQ=1 EPA
Arkansas State	Diethylstilbestrol	56-53-1	0.0014	HQ=1 EPA
Arkansas State	Difenzoquat	43222-48-6	4900	HQ=1 EPA
Arkansas State	Diflubenzuron	35367-38-5	1200	HQ=1 EPA
Arkansas State	Diisopropyl Methylphosphonate	1445-75-6	6300	HQ=1 EPA
Arkansas State	Dimethipin	55290-64-7	1200	HQ=1 EPA
Arkansas State	Dimethoate	60-51-5	12	HQ=1 EPA
Arkansas State	Dimethylaniline HCl, 2,4-	21436-96-4	0.84	HQ=1 EPA
Arkansas State	Dimethylaniline, 2,4-	95-68-1	2.4	HQ=1 EPA
Arkansas State	Dinitro-o-cresol, 4,6-	534-52-1	4.9	HQ=1 EPA
Arkansas State	Dinoseb	88-85-7	61	HQ=1 EPA
Arkansas State	Diphenamid	957-51-7	1800	HQ=1 EPA
Arkansas State	Diphenylamine	122-39-4	1500	HQ=1 EPA
Arkansas State	Diquat	85-00-7	130	HQ=1 EPA
Arkansas State	Disulfoton	298-04-4	2.4	HQ=1 EPA
Arkansas State	Diuron	330-54-1	120	HQ=1 EPA
Arkansas State	Dodine	2439-10-3	240	HQ=1 EPA
Arkansas State	Endosulfan	115-29-7	370	HQ=1 EPA
Arkansas State	Endothall	145-73-3	1200	HQ=1 EPA
Arkansas State	Endrin	72-20-8	18	HQ=1 EPA
Arkansas State	EPTC	759-94-4	2000	HQ=1 EPA
Arkansas State	Ethephon	16672-87-0	310	HQ=1 EPA
Arkansas State	Ethion	563-12-2	31	HQ=1 EPA
Arkansas State	Ethylene Diamine	107-15-3	5500	HQ=1 EPA
Arkansas State	Ethyl-p-nitrophenyl Phosphonate	2104-64-5	0.61	HQ=1 EPA
Arkansas State	Express	101200-48-0	490	HQ=1 EPA
Arkansas State	Fenamiphos	22224-92-6	15	HQ=1 EPA
Arkansas State	Fenpropathrin	39515-41-8	1500	HQ=1 EPA
Arkansas State	Fluometuron	2164-17-2	790	HQ=1 EPA
Arkansas State	Fluridone	59756-60-4	4900	HQ=1 EPA
Arkansas State	Flurprimidol	56425-91-3	1200	HQ=1 EPA
Arkansas State	Flutolanil	66332-96-5	3700	HQ=1 EPA
Arkansas State	Fluvalinate	69409-94-5	610	HQ=1 EPA
Arkansas State	Folpet	133-07-3	140	HQ=1 EPA
Arkansas State	Fomesafen	72178-02-0	2.6	HQ=1 EPA
Arkansas State	Fonofos	944-22-9	120	HQ=1 EPA
Arkansas State	Formaldehyde	50-00-0	12000	HQ=1 EPA
Arkansas State	Formic Acid	64-18-6	49000	HQ=1 EPA
Arkansas State	Fosetyl-AL	39148-24-8	180000	HQ=1 EPA
Arkansas State	Furazolidone	67-45-8	0.13	HQ=1 EPA
Arkansas State	Furium	531-82-8	0.32	HQ=1 EPA
Arkansas State	Furmecyclox	60568-05-0	16	HQ=1 EPA
Arkansas State	Glufosinate, Ammonium	77182-82-2	24	HQ=1 EPA
Arkansas State	Glutaraldehyde	111-30-8	110000	HQ=1 EPA
Arkansas State	Glyphosate	1071-83-6	6100	HQ=1 EPA
Arkansas State	Goal	42874-03-3	180	HQ=1 EPA
Arkansas State	Guthion	86-50-0	180	HQ=1 EPA
Arkansas State	Haloxyfop, Methyl	69806-40-2	3.1	HQ=1 EPA
Arkansas State	Harmony	79277-27-3	790	HQ=1 EPA
Arkansas State	Heptachlor	76-44-8	0.11	HQ=1 EPA
Arkansas State	Heptachlor Epoxide	1024-57-3	0.053	HQ=1 EPA
Arkansas State	Hexachlorocyclohexane, Alpha-	319-84-6	0.077	HQ=1 EPA
Arkansas State	Hexachlorocyclohexane, Beta-	319-85-7	0.27	HQ=1 EPA
Arkansas State	Hexachlorocyclohexane, Gamma- (Lindane)	58-89-9	0.52	HQ=1 EPA
Arkansas State	Hexachlorocyclohexane, Technical	608-73-1	0.27	HQ=1 EPA
Arkansas State	Hexachlorocyclopentadiene	77-47-4	370	HQ=1 EPA
Arkansas State	Hexachlorophene (germicidal soaps)	70-30-4	18	HQ=1 EPA
Arkansas State	Hexazinone	51235-04-2	2000	HQ=1 EPA
Arkansas State	Hydrogen Cyanide	74-90-8	23	HQ=1 EPA
Arkansas State	Imazalil	35554-44-0	790	HQ=1 EPA
Arkansas State	Imazaquin	81335-37-7	15000	HQ=1 EPA
Arkansas State	Iprodione	36734-19-7	2400	HQ=1 EPA
Arkansas State	Isopropalin	33820-53-0	920	HQ=1 EPA
Arkansas State	Isopropyl Methyl Phosphonic Acid	1832-54-8	6100	HQ=1 EPA
Arkansas State	Isoxaben	82558-50-7	3100	HQ=1 EPA
Arkansas State	Kerb	23950-58-5	4600	HQ=1 EPA
Arkansas State	Lactofen	77501-63-4	120	HQ=1 EPA
Arkansas State	Linuron	330-55-2	120	HQ=1 EPA
Arkansas State	Londax	83055-99-6	12000	HQ=1 EPA
Arkansas State	Malathion	121-75-5	1200	HQ=1 EPA
Arkansas State	Maleic Anhydride	108-31-6	6100	HQ=1 EPA
Arkansas State	Maleic Hydrazide	123-33-1	31000	HQ=1 EPA
Arkansas State	Mancozeb	8018-01-7	1800	HQ=1 EPA
Arkansas State	Maneb	12427-38-2	310	HQ=1 EPA
Arkansas State	MCPA	94-74-6	31	HQ=1 EPA
Arkansas State	MCPB	94-81-5	610	HQ=1 EPA
Arkansas State	MCPP	93-65-2	61	HQ=1 EPA
Arkansas State	Mephosfolan	950-10-7	5.5	HQ=1 EPA
Arkansas State	Mepiquat Chloride	24307-26-4	1800	HQ=1 EPA
Arkansas State	Mercuric Chloride	7487-94-7	23	HQ=1 EPA
Arkansas State	Merphos	150-50-5	1.8	HQ=1 EPA
Arkansas State	Merphos Oxide (AKA Tribufos)	78-48-8	1.8	HQ=1 EPA
Arkansas State	Metalaxyl	57837-19-1	3700	HQ=1 EPA
Arkansas State	Methamidophos	10265-92-6	3.1	HQ=1 EPA
Arkansas State	Methidathion	950-37-8	61	HQ=1 EPA
Arkansas State	Methomyl	16752-77-5	1500	HQ=1 EPA
Arkansas State	Methoxychlor	72-43-5	310	HQ=1 EPA
Arkansas State	Methyl Isocyanate	624-83-9	5	HQ=1 EPA
Arkansas State	Methyl Mercury	22967-92-6	7.8	HQ=1 EPA
Arkansas State	Methyl Parathion	298-00-0	15	HQ=1 EPA
Arkansas State	Methylarsonic acid	124-58-3	610	HQ=1 EPA
Arkansas State	Methylcholanthrene, 3-	56-49-5	0.0052	HQ=1 EPA
Arkansas State	Methylnaphthalene, 1-	90-12-0	16	HQ=1 EPA
Arkansas State	Methylnaphthalene, 2-	91-57-6	230	HQ=1 EPA
Arkansas State	Metolachlor	51218-45-2	9200	HQ=1 EPA
Arkansas State	Metribuzin	21087-64-9	1500	HQ=1 EPA
Arkansas State	Mirex	2385-85-5	0.027	HQ=1 EPA
Arkansas State	Molinate	2212-67-1	120	HQ=1 EPA
Arkansas State	Naled	300-76-5	120	HQ=1 EPA
Arkansas State	Napropamide	15299-99-7	6100	HQ=1 EPA
Arkansas State	Nitrofurantoin	67-20-9	4300	HQ=1 EPA
Arkansas State	Norflurazon	27314-13-2	2400	HQ=1 EPA
Arkansas State	Nustar	85509-19-9	43	HQ=1 EPA
Arkansas State	Octamethylpyrophosphoramide	152-16-9	120	HQ=1 EPA
Arkansas State	Oryzalin	19044-88-3	3100	HQ=1 EPA
Arkansas State	Oxadiazon	19666-30-9	310	HQ=1 EPA
Arkansas State	Oxamyl	23135-22-0	1500	HQ=1 EPA
Arkansas State	Paclobutrazol	76738-62-0	790	HQ=1 EPA
Arkansas State	Paraquat Dichloride	1910-42-5	270	HQ=1 EPA
Arkansas State	Parathion	56-38-2	370	HQ=1 EPA
Arkansas State	Pebulate	1114-71-2	3100	HQ=1 EPA
Arkansas State	Pendimethalin	40487-42-1	2400	HQ=1 EPA
Arkansas State	Pentachloronitrobenzene	82-68-8	1.9	HQ=1 EPA
Arkansas State	Pentachlorophenol	87-86-5	0.89	HQ=1 EPA
Arkansas State	Permethrin	52645-53-1	3100	HQ=1 EPA
Arkansas State	Phenacetin	62-44-2	220	HQ=1 EPA
Arkansas State	Phenmedipham	13684-63-4	15000	HQ=1 EPA
Arkansas State	Phenol	108-95-2	18000	HQ=1 EPA
Arkansas State	Phenylmercuric Acetate	62-38-4	4.9	HQ=1 EPA
Arkansas State	Phorate	298-02-2	12	HQ=1 EPA
Arkansas State	Phosgene	75-44-5	0.33	HQ=1 EPA
Arkansas State	Phosmet	732-11-6	1200	HQ=1 EPA
Arkansas State	Phosphine	7803-51-2	23	HQ=1 EPA
Arkansas State	Picloram	1918-02-1	4300	HQ=1 EPA
Arkansas State	Pirimiphos, Methyl	29232-93-7	610	HQ=1 EPA
Arkansas State	Potassium Silver Cyanide	506-61-6	390	HQ=1 EPA
Arkansas State	Prochloraz	67747-09-5	3.2	HQ=1 EPA
Arkansas State	Profluralin	26399-36-0	370	HQ=1 EPA
Arkansas State	Prometon	1610-18-0	920	HQ=1 EPA
Arkansas State	Prometryn	7287-19-6	240	HQ=1 EPA
Arkansas State	Propachlor	1918-16-7	790	HQ=1 EPA
Arkansas State	Propanil	709-98-8	310	HQ=1 EPA
Arkansas State	Propargite	2312-35-8	1200	HQ=1 EPA
Arkansas State	Propargyl Alcohol	107-19-7	120	HQ=1 EPA
Arkansas State	Propazine	139-40-2	1200	HQ=1 EPA
Arkansas State	Propham	122-42-9	1200	HQ=1 EPA
Arkansas State	Propiconazole	60207-90-1	790	HQ=1 EPA
Arkansas State	Propylene Glycol	57-55-6	1200000	HQ=1 EPA
Arkansas State	Propylene Oxide	75-56-9	2	HQ=1 EPA
Arkansas State	Pursuit	81335-77-5	15000	HQ=1 EPA
Arkansas State	Pydrin	51630-58-1	1500	HQ=1 EPA
Arkansas State	Pyridine	110-86-1	78	HQ=1 EPA
Arkansas State	Quinalphos	13593-03-8	31	HQ=1 EPA
Arkansas State	Resmethrin	10453-86-8	1800	HQ=1 EPA
Arkansas State	Ronnel	299-84-3	3100	HQ=1 EPA
Arkansas State	Rotenone	83-79-4	240	HQ=1 EPA
Arkansas State	Safrole	94-59-7	0.52	HQ=1 EPA
Arkansas State	Savey	78587-05-0	1500	HQ=1 EPA
Arkansas State	Selenium Sulfide	7446-34-6	390	HQ=1 EPA
Arkansas State	Sethoxydim	74051-80-2	5500	HQ=1 EPA
Arkansas State	Simazine	122-34-9	4.1	HQ=1 EPA
Arkansas State	Sodium Acifluorfen	62476-59-9	790	HQ=1 EPA
Arkansas State	Sodium Azide	26628-22-8	310	HQ=1 EPA
Arkansas State	Sodium Diethyldithiocarbamate	148-18-5	1.8	HQ=1 EPA
Arkansas State	Sodium Fluoride	7681-49-4	3900	HQ=1 EPA
Arkansas State	Sodium Fluoroacetate	62-74-8	1.2	HQ=1 EPA
Arkansas State	Stirofos (Tetrachlorovinphos)	961-11-5	20	HQ=1 EPA
Arkansas State	Strychnine	57-24-9	18	HQ=1 EPA
Arkansas State	Systhane	88671-89-0	1500	HQ=1 EPA
Arkansas State	TCMTB	21564-17-0	1800	HQ=1 EPA
Arkansas State	Tebuthiuron	34014-18-1	4300	HQ=1 EPA
Arkansas State	Temephos	3383-96-8	1200	HQ=1 EPA
Arkansas State	Terbacil	5902-51-2	790	HQ=1 EPA
Arkansas State	Terbufos	13071-79-9	1.5	HQ=1 EPA
Arkansas State	Terbutryn	886-50-0	61	HQ=1 EPA
Arkansas State	Tetraethyl Dithiopyrophosphate	3689-24-5	31	HQ=1 EPA
Arkansas State	Thallium Sulfate	7446-18-6	1.6	HQ=1 EPA
Arkansas State	Thiobencarb	28249-77-6	610	HQ=1 EPA
Arkansas State	Thiofanox	39196-18-4	18	HQ=1 EPA
Arkansas State	Thiophanate, Methyl	23564-05-8	4900	HQ=1 EPA
Arkansas State	Thiram	137-26-8	310	HQ=1 EPA
Arkansas State	Toxaphene	8001-35-2	0.44	HQ=1 EPA
Arkansas State	Tralomethrin	66841-25-6	460	HQ=1 EPA
Arkansas State	Triallate	2303-17-5	790	HQ=1 EPA
Arkansas State	Triasulfuron	82097-50-5	610	HQ=1 EPA
Arkansas State	Tribromobenzene, 1,2,4-	615-54-3	310	HQ=1 EPA
Arkansas State	Tributyltin Compounds	NA	18	HQ=1 EPA
Arkansas State	Tributyltin Oxide	56-35-9	18	HQ=1 EPA
Arkansas State	Trichlorophenoxyacetic Acid, 2,4,5-	93-76-5	610	HQ=1 EPA
Arkansas State	Trichlorophenoxypropionic acid, -2,4,5	93-72-1	490	HQ=1 EPA
Arkansas State	Tridiphane	58138-08-2	180	HQ=1 EPA
Arkansas State	Trifluralin	1582-09-8	63	HQ=1 EPA
Arkansas State	Vernolate	1929-77-7	61	HQ=1 EPA
Arkansas State	Vinclozolin	50471-44-8	1500	HQ=1 EPA
Arkansas State	Warfarin	81-81-2	18	HQ=1 EPA
Arkansas State	Zinc Phosphide	1314-84-7	23	HQ=1 EPA
Arkansas State	Zineb	12122-67-7	3100	HQ=1 EPA
5. California State	2, 4-D	94-75-7	690	Table 1. SOIL-SCREENING NUMBERS - UPDATED TABLE
California State	2,4,5-T	93-76-5	550	Table 1. SOIL-SCREENING NUMBERS - UPDATED TABLE
California State	Pentachlorophenol	87-86-5	4.4	Table 1. SOIL-SCREENING NUMBERS - UPDATED TABLE
California State	Aldrin	309-00-2	0.033	Table 1. SOIL-SCREENING NUMBERS - UPDATED TABLE
California State	Chlordane	12789-03-6,57-74-9	0.43	Table 1. SOIL-SCREENING NUMBERS - UPDATED TABLE
California State	4,4' - DDD	72-54-8	2.3	Table 1. SOIL-SCREENING NUMBERS - UPDATED TABLE
California State	4,4' - DDE	72-55-9	1.6	Table 1. SOIL-SCREENING NUMBERS - UPDATED TABLE
California State	4,4' - DDT	50-29-3	1.6	Table 1. SOIL-SCREENING NUMBERS - UPDATED TABLE
California State	Dieldrin	60-57-1	0.035	Table 1. SOIL-SCREENING NUMBERS - UPDATED TABLE
California State	Endrin	72-20-8	21	Table 1. SOIL-SCREENING NUMBERS - UPDATED TABLE
California State	Heptachlor	76-44-8	0.13	Table 1. SOIL-SCREENING NUMBERS - UPDATED TABLE
California State	HCH (gamma) Lindane (gamma - BHC)	58-89-9	0.5	Table 1. SOIL-SCREENING NUMBERS - UPDATED TABLE
California State	Kepone	143-50-0	0.035	Table 1. SOIL-SCREENING NUMBERS - UPDATED TABLE
California State	Methoxychlor	72-43-5	340	Table 1. SOIL-SCREENING NUMBERS - UPDATED TABLE
California State	Mirex	2385-85-5	0.031	Table 1. SOIL-SCREENING NUMBERS - UPDATED TABLE
California State	Toxaphene	8001-35-2	0.46	Table 1. SOIL-SCREENING NUMBERS - UPDATED TABLE
6. Colorado State	Dichloropropane, 1,2-	78-87-5	1	VOCs-Table 1. CSEV
Colorado State	Dichloropropene, 1,3-	542-75-6	2	VOCs-Table 1. CSEV
Colorado State	Bromomethane	74-83-9	10	VOCs-Table 1. CSEV
Colorado State	Dichlorodifluoromethane	75-71-8	250	VOCs-Table 1. CSEV
Colorado State	Chlordane	12789-03-6	1.6	SVOCs-Table 1. CSEV
Colorado State	Hexachlorobutadiene	87-68-3	6.2	SVOCs-Table 1. CSEV
Colorado State	Hexachlorocyclopentadiene	77-47-4	370	SVOCs-Table 1. CSEV
Colorado State	Pentachlorophenol	87-86-5	3	SVOCs-Table 1. CSEV
Colorado State	Pyridine	110-86-1	61	SVOCs-Table 1. CSEV
Colorado State	2,4,5-T	93-76-5	610	Pesticides-Table 1. CSEV
Colorado State	2,4,5-TP	93-72-1	490	Pesticides-Table 1. CSEV
Colorado State	2,4-Dichlorophenoxyacetic acid (2,4-D)	94-75-7	690	Pesticides-Table 1. CSEV
Colorado State	2,4-DB	94-82-6	490	Pesticides-Table 1. CSEV
Colorado State	4,4' - DDD	72-54-8	2	Pesticides-Table 1. CSEV
Colorado State	4,4' - DDE	72-55-9	1.4	Pesticides-Table 1. CSEV
Colorado State	4,4' - DDT	50-29-3	1.7	Pesticides-Table 1. CSEV
Colorado State	Aldicarb Sulfone	1646-88-4	61	Pesticides-Table 1. CSEV
Colorado State	Aldrin	309-00-2	0.029	Pesticides-Table 1. CSEV
Colorado State	HCH (alpha) (alpha - BHC)	319-84-6	0.077	Pesticides-Table 1. CSEV
Colorado State	HCH (beta) (beta - BHC)	319-85-7	0.27	Pesticides-Table 1. CSEV
Colorado State	Dalapon	75-99-0	1800	Pesticides-Table 1. CSEV
Colorado State	Dieldrin	60-57-1	0.03	Pesticides-Table 1. CSEV
Colorado State	Dinoseb	88-85-7	61	Pesticides-Table 1. CSEV
Colorado State	Endosulfan 1	115-29-7	370	Pesticides-Table 1. CSEV
Colorado State	Endrin	72-20-8	18	Pesticides-Table 1. CSEV
Colorado State	HCH (gamma) Lindane (gamma - BHC)	58-89-9	0.52	Pesticides-Table 1. CSEV
Colorado State	Heptachlor	76-44-8	0.11	Pesticides-Table 1. CSEV
Colorado State	Heptachlor epoxide	1024-57-3	0.053	Pesticides-Table 1. CSEV
Colorado State	Isophorone	78-59-1	510	Pesticides-Table 1. CSEV
Colorado State	MCPA	94-74-6	31	Pesticides-Table 1. CSEV
Colorado State	MCPP	93-65-2	61	Pesticides-Table 1. CSEV
Colorado State	Methoxychlor	72-43-5	310	Pesticides-Table 1. CSEV
Colorado State	Phorate	298-02-2	12	Pesticides-Table 1. CSEV
Colorado State	Terbufos	13071-79-9	1.5	Pesticides-Table 1. CSEV
Colorado State	Toxaphene	8001-35-2	0.44	Pesticides-Table 1. CSEV
7. Connecticut State	Bis(2-chloroethyl)ether	111-44-4	1	Appendix A
Connecticut State	Chlorophenol, 2-	95-57-8	340	Appendix A
Connecticut State	Dichlorophenol, 2,4-	120-83-2	200	Appendix A
Connecticut State	Pentachlorophenol	87-86-5	5.1	Appendix A
Connecticut State	Phenol	108-95-2	1000	Appendix A
Connecticut State	Alachlor	15972-60-8	7.7	Appendix A
Connecticut State	Aldicarb	116-06-3	14	Appendix A
Connecticut State	Atrazine	1912-24-9	2.8	Appendix A
Connecticut State	Chlordane	12789-03-6,57-74-9	0.49	Appendix A
Connecticut State	Dieldrin	60-57-1	0.038	Appendix A
Connecticut State	Endrin	72-20-8	20	Appendix A
Connecticut State	2,4-Dichlorophenoxyacetic acid (2,4-D)	94-75-7	680	Appendix A
Connecticut State	Heptachlor	76-44-8	0.14	Appendix A
Connecticut State	Heptachlor epoxide	1024-57-3	0.067	Appendix A
Connecticut State	HCH (gamma) Lindane (gamma - BHC)	58-89-9	20	Appendix A
Connecticut State	Methoxychlor	72-43-5	340	Appendix A
Connecticut State	Toxaphene	8001-35-2	0.56	Appendix A
8. Delaware State	Acetochlor	34256-82-1	7
Delaware State	Acrolein	107-02-8	0.0004
Delaware State	Alachlor	15972-60-8	0.2
Delaware State	Alar	1596-84-5	55
Delaware State	Aldicarb	116-06-3	0.7
Delaware State	Aldicarb Sulfone	1646-88-4	0.4
Delaware State	Aldrin	309-00-2	0.0004
Delaware State	Aniline	62-53-3	1
Delaware State	Assure	76578-14-8	3
Delaware State	Atrazine	1912-24-9	0.3
Delaware State	Baygon	114-26-1	2
Delaware State	Baythroid	68359-37-5	9
Delaware State	Bentazon	25057-89-0	11
Delaware State	Benzyl Alcohol	100-51-6	110
Delaware State	Bis(2-chloroethyl)ether	111-44-4	0.001
Delaware State	Bromomethane	74-83-9	1
Delaware State	Bromophos	2104-96-3	2
Delaware State	Carbaryl	63-25-2	70
Delaware State	Carbosulfan	55285-14-8	4
Delaware State	Chloranil	118-75-2	0.02
Delaware State	Chlordane	57-74-9	2
Delaware State	Chloroaniline, p-	106-47-8	2
Delaware State	Chlorobenzilate	510-15-6	2
Delaware State	Chloronitrobenzene, o-	88-73-3	0.04
Delaware State	Chloronitrobenzene, p-	100-00-5	0.06
Delaware State	Chlorpyrifos	2921-88-2	23
Delaware State	Chlorpyrifos-methyl	5598-13-0	30
Delaware State	Cyanazine	21725-46-2	0.01
Delaware State	Cyanogen Bromide	506-68-3	33
Delaware State	Cyanogen Chloride	506-77-4	18
Delaware State	Potassium Silver Cyanide	506-61-6	73
Delaware State	Cyhalothrin/Karate	68085-85-8	2
Delaware State	Cypermethrin	52315-07-8	4
Delaware State	Dacthal	1861-32-1	4
Delaware State	Dalapon	75-99-0	20
Delaware State	4,4' - DDD	72-54-8	3
Delaware State	4,4' - DDE	72-55-9	2
Delaware State	4,4' - DDT	50-29-3	2
Delaware State	Diazinon	333-41-5	0.06
Delaware State	Dibromo-3-chloropropane, 1,2-	96-12-8	0.02
Delaware State	Dicamba	1918-00-9	11
Delaware State	2,4-Dichlorophenoxyacetic acid (2,4-D)	94-75-7	7
Delaware State	4-(2,4-Dichlorophenoxy)butyric Acid (2,4-DB)	94-82-6	3
Delaware State	1,3-Dichloropropene	542-75-6	0.008
Delaware State	Dichloropropane, 1,2-	78-87-5	0.5
Delaware State	Dichloropropene, 1,3-	542-75-6	0.008
Delaware State	Dichlorvos	62-73-7	0.02
Delaware State	Dicofol	115-32-2	0.02
Delaware State	Dieldrin	60-57-1	0.04
Delaware State	Difenzoquat (Avenge)	43222-48-6	29
Delaware State	Diisopropyl Methylphosphonate	1445-75-6	29
Delaware State	Dinoseb	88-85-7	0.7
Delaware State	Diquat	85-00-7	2
Delaware State	Disulfoton	298-04-4	0.08
Delaware State	Diuron	330-54-1	1
Delaware State	Endosulfan	115-29-7	47
Delaware State	Endothall	145-73-3	10
Delaware State	Endrin	72-20-8	2
Delaware State	Epichlorohydrin	106-89-8	0.01
Delaware State	Ethion	563-12-2	4
Delaware State	Ethylene Diamine	107-15-3	7
Delaware State	Fenamiphos	22224-92-6	0.2
Delaware State	Fluometuron	2164-17-2	5
Delaware State	Fomesafen	72178-02-0	0.04
Delaware State	Fonofos	944-22-9	3
Delaware State	Furazolidone	67-45-8	0.02
Delaware State	Furfural	98-01-1	1
Delaware State	Glyphosate	1071-83-6	0.2
Delaware State	HCH (alpha) (alpha - BHC)	319-84-6	0.001
Delaware State	HCH (beta) (beta - BHC)	319-85-7	0.004
Delaware State	HCH (gamma) Lindane (gamma - BHC)	58-89-9	0.07
Delaware State	HCH-technical	608-73-1	0.004
Delaware State	Heptachlor	76-44-8	0.1
Delaware State	Heptachlor epoxide	1024-57-3	0.07
Delaware State	Hexachlorocyclopentadiene	77-47-4	10
Delaware State	Hexachlorophene	70-30-4	0.1
Delaware State	Hexazinone	51235-04-2	12
Delaware State	Isopropalin	33820-53-0	120
Delaware State	Isopropyl Methyl Phosphonic Acid	1832-54-8	37
Delaware State	Malathion	121-75-5	67
Delaware State	Mephosfolan	950-10-7	0.03
Delaware State	Mepiquat chloride	24307-26-4	11
Delaware State	Mercuric Chloride	7487-94-7	0.1
Delaware State	Methidathion	950-37-8	0.4
Delaware State	Methoxychlor	72-43-5	39
Delaware State	Methyl parathion	298-00-0	0.4
Delaware State	Cresol, o-	95-48-7	18
Delaware State	Cresol, m-	108-39-4	18
Delaware State	Cresol, p-	106-44-5	2
Delaware State	Metolaclor (Dual)	51218-45-2	55
Delaware State	Mirex	2385-85-5	0.7
Delaware State	Naled	300-76-5	0.7
Delaware State	NuStar	85509-19-9	0.3
Delaware State	Oryzalin	19044-88-3	18
Delaware State	Oxadiazon	19666-30-9	15
Delaware State	Oxamyl (Vydate)	23135-22-0	20
Delaware State	Oxyfluorfen	42874-03-3	1
Delaware State	Paraquat	4685-14-7	2
Delaware State	Parathion	56-38-2	13
Delaware State	Pentachlorophenol	87-86-5	5
Delaware State	Permethrin	52645-53-1	18
Delaware State	Phosphine	7803-51-2	0.1
Delaware State	Picloram	1918-2-1	50
Delaware State	Prometon	1610-18-0	6
Delaware State	Prometryn	7287-19-6	2
Delaware State	Propachlor	1918-16-7	5
Delaware State	Propanil	709-98-8	2
Delaware State	Propargite	2312-35-8	7
Delaware State	Propylene glycol	57-55-6	1000
Delaware State	Pursuit	81335-77-5	91
Delaware State	Pyridine	110-86-1	0.4
Delaware State	Resmethrin	10453-86-8	11
Delaware State	Ronnel	299-84-3	18
Delaware State	Rotenone	83-79-4	2
Delaware State	Simazine	122-34-9	0.4
Delaware State	Sodium azide	26628-22-8	2
Delaware State	Strychnine	57-24-9	0.1
Delaware State	Thallium Sulfate	7446-18-6	0.03
Delaware State	Thiobencarb	28249-77-6	4
Delaware State	Toxaphene	8001-35-2	0.6
Delaware State	Trichlorophenoxyacetic Acid, 2,4,5-	93-76-5	7
Delaware State	2-(2,4,5-Trichlorophenoxy) propionic acid (2,4,5-TP)	93-72-1	22
Delaware State	Vinclozolin	50471-44-8	9
Delaware State	Warfarin	81-81-2	0.3
Delaware State	Zinc phosphide	1314-84-7	0.1
Delaware State	Zineb	12122-67-7	18
Delaware State	Acephate	30560-19-1	56	DNREC-SIRSSCREENING LEVEL TABLE – JULY 2013
Delaware State	Acetochlor	34256-82-1	120	DNREC-SIRSSCREENING LEVEL TABLE – JULY 2013
Delaware State	Acetylaminofluorene, 2-	53-96-3	0.13	DNREC-SIRSSCREENING LEVEL TABLE – JULY 2013
Delaware State	Acrolein	107-02-8	0.015	DNREC-SIRSSCREENING LEVEL TABLE – JULY 2013
Delaware State	Alachlor	15972-60-8	8.7	DNREC-SIRSSCREENING LEVEL TABLE – JULY 2013
Delaware State	ALAR	1596-84-5	27	DNREC-SIRSSCREENING LEVEL TABLE – JULY 2013
Delaware State	Aldicarb	116-06-3	6.1	DNREC-SIRSSCREENING LEVEL TABLE – JULY 2013
Delaware State	Aldicarb Sulfone	1646-88-4	6.1	DNREC-SIRSSCREENING LEVEL TABLE – JULY 2013
Delaware State	Aldrin	309-00-2	0.029	DNREC-SIRSSCREENING LEVEL TABLE – JULY 2013
Delaware State	Ally	74223-64-6	1500	DNREC-SIRSSCREENING LEVEL TABLE – JULY 2013
Delaware State	Aluminum Phosphide	20859-73-8	3.1	DNREC-SIRSSCREENING LEVEL TABLE – JULY 2013
Delaware State	Amdro	67485-29-4	1.8	DNREC-SIRSSCREENING LEVEL TABLE – JULY 2013
Delaware State	Ametryn	834-12-8	55	DNREC-SIRSSCREENING LEVEL TABLE – JULY 2013
Delaware State	Amitraz	33089-61-1	15	DNREC-SIRSSCREENING LEVEL TABLE – JULY 2013
Delaware State	Ammonium Sulfamate	7773-06-0	1600	DNREC-SIRSSCREENING LEVEL TABLE – JULY 2013
Delaware State	Antimony Potassium Tartrate	11071-15-1	7	DNREC-SIRSSCREENING LEVEL TABLE – JULY 2013
Delaware State	Apollo	74115-24-5	79	DNREC-SIRSSCREENING LEVEL TABLE – JULY 2013
Delaware State	Aramite	140-57-8	19	DNREC-SIRSSCREENING LEVEL TABLE – JULY 2013
Delaware State	Arsine	7784-42-1	0.027	DNREC-SIRSSCREENING LEVEL TABLE – JULY 2013
Delaware State	Assure	76578-14-8	55	DNREC-SIRSSCREENING LEVEL TABLE – JULY 2013
Delaware State	Asulam	3337-71-1	310	DNREC-SIRSSCREENING LEVEL TABLE – JULY 2013
Delaware State	Atrazine	1912-24-9	2.1	DNREC-SIRSSCREENING LEVEL TABLE – JULY 2013
Delaware State	Auramine	492-80-8	0.55	DNREC-SIRSSCREENING LEVEL TABLE – JULY 2013
Delaware State	Avermectin B1	65195-55-3	2.4	DNREC-SIRSSCREENING LEVEL TABLE – JULY 2013
Delaware State	Azobenzene	103-33-3	5.1	DNREC-SIRSSCREENING LEVEL TABLE – JULY 2013
Delaware State	Baygon	114-26-1	24	DNREC-SIRSSCREENING LEVEL TABLE – JULY 2013
Delaware State	Bayleton	43121-43-3	180	DNREC-SIRSSCREENING LEVEL TABLE – JULY 2013
Delaware State	Baythroid	68359-37-5	150	DNREC-SIRSSCREENING LEVEL TABLE – JULY 2013
Delaware State	Benefin	1861-40-1	1800	DNREC-SIRSSCREENING LEVEL TABLE – JULY 2013
Delaware State	Benomyl	17804-35-2	310	DNREC-SIRSSCREENING LEVEL TABLE – JULY 2013
Delaware State	Bentazon	25057-89-0	180	DNREC-SIRSSCREENING LEVEL TABLE – JULY 2013
Delaware State	Benzyl Alcohol	100-51-6	610	DNREC-SIRSSCREENING LEVEL TABLE – JULY 2013
Delaware State	Bidrin	141-66-2	0.61	DNREC-SIRSSCREENING LEVEL TABLE – JULY 2013
Delaware State	Bifenox	42576-02-3	55	DNREC-SIRSSCREENING LEVEL TABLE – JULY 2013
Delaware State	Biphenthrin	82657-04-3	92	DNREC-SIRSSCREENING LEVEL TABLE – JULY 2013
Delaware State	Bis(2-chloroethyl)ether	111-44-4	0.21	DNREC-SIRSSCREENING LEVEL TABLE – JULY 2013
Delaware State	Bromo-2-chloroethane, 1-	107-04-0	0.024	DNREC-SIRSSCREENING LEVEL TABLE – JULY 2013
Delaware State	Bromomethane	74-83-9	0.73	DNREC-SIRSSCREENING LEVEL TABLE – JULY 2013
Delaware State	Bromophos	2104-96-3	31	DNREC-SIRSSCREENING LEVEL TABLE – JULY 2013
Delaware State	Bromoxynil	1689-84-5	120	DNREC-SIRSSCREENING LEVEL TABLE – JULY 2013
Delaware State	Bromoxynil Octanoate	1689-99-2	120	DNREC-SIRSSCREENING LEVEL TABLE – JULY 2013
Delaware State	Butylate	2008-41-5	310	DNREC-SIRSSCREENING LEVEL TABLE – JULY 2013
Delaware State	Cacodylic Acid	75-60-5	120	DNREC-SIRSSCREENING LEVEL TABLE – JULY 2013
Delaware State	Captafol	2425-06-1	3.2	DNREC-SIRSSCREENING LEVEL TABLE – JULY 2013
Delaware State	Captan	133-06-2	210	DNREC-SIRSSCREENING LEVEL TABLE – JULY 2013
Delaware State	Carbaryl	63-25-2	610	DNREC-SIRSSCREENING LEVEL TABLE – JULY 2013
Delaware State	Carbofuran	1563-66-2	31	DNREC-SIRSSCREENING LEVEL TABLE – JULY 2013
Delaware State	Carbosulfan	55285-14-8	61	DNREC-SIRSSCREENING LEVEL TABLE – JULY 2013
Delaware State	Carboxin	5234-68-4	610	DNREC-SIRSSCREENING LEVEL TABLE – JULY 2013
Delaware State	Chloramben	133-90-4	92	DNREC-SIRSSCREENING LEVEL TABLE – JULY 2013
Delaware State	Chloranil	118-75-2	1.2	DNREC-SIRSSCREENING LEVEL TABLE – JULY 2013
Delaware State	Chlordane	12789-03-6	1.6	DNREC-SIRSSCREENING LEVEL TABLE – JULY 2013
Delaware State	Chlordecone (Kepone)	143-50-0	0.049	DNREC-SIRSSCREENING LEVEL TABLE – JULY 2013
Delaware State	Chlorfenvinphos	470-90-6	4.3	DNREC-SIRSSCREENING LEVEL TABLE – JULY 2013
Delaware State	Chlorimuron, Ethyl	90982-32-4	120	DNREC-SIRSSCREENING LEVEL TABLE – JULY 2013
Delaware State	Chloro-2-methylaniline, 4-	95-69-2	4.9	DNREC-SIRSSCREENING LEVEL TABLE – JULY 2013
Delaware State	Chloroaniline, p-	106-47-8	2.4	DNREC-SIRSSCREENING LEVEL TABLE – JULY 2013
Delaware State	Chlorobenzilate	510-15-6	4.4	DNREC-SIRSSCREENING LEVEL TABLE – JULY 2013
Delaware State	Chloronitrobenzene, o-	88-73-3	1.6	DNREC-SIRSSCREENING LEVEL TABLE – JULY 2013
Delaware State	Chloronitrobenzene, p-	100-00-5	6.1	DNREC-SIRSSCREENING LEVEL TABLE – JULY 2013
Delaware State	Chloropicrin	76-06-2	0.21	DNREC-SIRSSCREENING LEVEL TABLE – JULY 2013
Delaware State	Chlorothalonil	1897-45-6	160	DNREC-SIRSSCREENING LEVEL TABLE – JULY 2013
Delaware State	Chlorotoluene, o-	95-49-8	160	DNREC-SIRSSCREENING LEVEL TABLE – JULY 2013
Delaware State	Chlorozotocin	54749-90-5	0.002	DNREC-SIRSSCREENING LEVEL TABLE – JULY 2013
Delaware State	Chlorpropham	101-21-3	1200	DNREC-SIRSSCREENING LEVEL TABLE – JULY 2013
Delaware State	Chlorpyrifos	2921-88-2	6.1	DNREC-SIRSSCREENING LEVEL TABLE – JULY 2013
Delaware State	Chlorpyrifos Methyl	5598-13-0	61	DNREC-SIRSSCREENING LEVEL TABLE – JULY 2013
Delaware State	Chlorsulfuron	64902-72-3	310	DNREC-SIRSSCREENING LEVEL TABLE – JULY 2013
Delaware State	Chlorthiophos	60238-56-4	4.9	DNREC-SIRSSCREENING LEVEL TABLE – JULY 2013
Delaware State	Cresol, m-	108-39-4	310	DNREC-SIRSSCREENING LEVEL TABLE – JULY 2013
Delaware State	Cresol, o	95-48-7	310	DNREC-SIRSSCREENING LEVEL TABLE – JULY 2013
Delaware State	Cresol, p	106-44-5	610	DNREC-SIRSSCREENING LEVEL TABLE – JULY 2013
Delaware State	Cresol, p-chloro-m-	59-50-7	610	DNREC-SIRSSCREENING LEVEL TABLE – JULY 2013
Delaware State	Cresols	1319-77-3	610	DNREC-SIRSSCREENING LEVEL TABLE – JULY 2013
Delaware State	Cyanazine	21725-46-2	0.58	DNREC-SIRSSCREENING LEVEL TABLE – JULY 2013
Delaware State	Cyanogen Bromide	506-68-3	700	DNREC-SIRSSCREENING LEVEL TABLE – JULY 2013
Delaware State	Cyanogen Chloride	506-77-4	390	DNREC-SIRSSCREENING LEVEL TABLE – JULY 2013
Delaware State	Cyhalothrin/karate	68085-85-8	31	DNREC-SIRSSCREENING LEVEL TABLE – JULY 2013
Delaware State	Cypermethrin	52315-07-8	61	DNREC-SIRSSCREENING LEVEL TABLE – JULY 2013
Delaware State	Cyromazine	66215-27-8	46	DNREC-SIRSSCREENING LEVEL TABLE – JULY 2013
Delaware State	Dacthal	1861-32-1	61	DNREC-SIRSSCREENING LEVEL TABLE – JULY 2013
Delaware State	Dalapon	75-99-0	180	DNREC-SIRSSCREENING LEVEL TABLE – JULY 2013
Delaware State	DDD	72-54-8	2	DNREC-SIRSSCREENING LEVEL TABLE – JULY 2013
Delaware State	DDE, p,p'-	72-55-9	1.4	DNREC-SIRSSCREENING LEVEL TABLE – JULY 2013
Delaware State	DDT	50-29-3	1.7	DNREC-SIRSSCREENING LEVEL TABLE – JULY 2013
Delaware State	Demeton	8065-48-3	0.24	DNREC-SIRSSCREENING LEVEL TABLE – JULY 2013
Delaware State	Diallate	2303-16-4	8	DNREC-SIRSSCREENING LEVEL TABLE – JULY 2013
Delaware State	Diazinon	333-41-5	4.3	DNREC-SIRSSCREENING LEVEL TABLE – JULY 2013
Delaware State	Dibromo-3-chloropropane, 1,2-	96-12-8	0.0054	DNREC-SIRSSCREENING LEVEL TABLE – JULY 2013
Delaware State	Dibromobenzene, 1,4-	106-37-6	61	DNREC-SIRSSCREENING LEVEL TABLE – JULY 2013
Delaware State	Dibromoethane, 1,2-	106-93-4	0.034	DNREC-SIRSSCREENING LEVEL TABLE – JULY 2013
Delaware State	Dicamba	1918-00-9	180	DNREC-SIRSSCREENING LEVEL TABLE – JULY 2013
Delaware State	Dichloroacetic Acid	79-43-6	9.7	DNREC-SIRSSCREENING LEVEL TABLE – JULY 2013
Delaware State	Dichlorobenzophenone, 4,4'-	90-98-2	55	DNREC-SIRSSCREENING LEVEL TABLE – JULY 2013
Delaware State	Dichlorophenoxy Acetic Acid, 2,4-	94-75-7	69	DNREC-SIRSSCREENING LEVEL TABLE – JULY 2013
Delaware State	Dichlorophenoxy)butyric Acid, 4-	94-82-6	49	DNREC-SIRSSCREENING LEVEL TABLE – JULY 2013
Delaware State	Dichloropropane, 1,2-	78-87-5	0.94	DNREC-SIRSSCREENING LEVEL TABLE – JULY 2013
Delaware State	Dichloropropene, 1,3-	542-75-6	1.7	DNREC-SIRSSCREENING LEVEL TABLE – JULY 2013
Delaware State	Dichlorvos	62-73-7	1.7	DNREC-SIRSSCREENING LEVEL TABLE – JULY 2013
Delaware State	Dieldrin	60-57-1	0.03	DNREC-SIRSSCREENING LEVEL TABLE – JULY 2013
Delaware State	Diethylformamide	617-84-5	6.1	DNREC-SIRSSCREENING LEVEL TABLE – JULY 2013
Delaware State	Diethylstilbestrol	56-53-1	0.0014	DNREC-SIRSSCREENING LEVEL TABLE – JULY 2013
Delaware State	Difenzoquat	43222-48-6	490	DNREC-SIRSSCREENING LEVEL TABLE – JULY 2013
Delaware State	Diflubenzuron	35367-38-5	120	DNREC-SIRSSCREENING LEVEL TABLE – JULY 2013
Delaware State	Diisopropyl Methylphosphonate	1445-75-6	630	DNREC-SIRSSCREENING LEVEL TABLE – JULY 2013
Delaware State	Dimethipin	55290-64-7	120	DNREC-SIRSSCREENING LEVEL TABLE – JULY 2013
Delaware State	Dimethoate	60-51-5	1.2	DNREC-SIRSSCREENING LEVEL TABLE – JULY 2013
Delaware State	Dimethylaniline HCl, 2,4-	21436-96-4	0.84	DNREC-SIRSSCREENING LEVEL TABLE – JULY 2013
Delaware State	Dimethylaniline, 2,4-	95-68-1	2.4	DNREC-SIRSSCREENING LEVEL TABLE – JULY 2013
Delaware State	Dinitro-o-cresol, 4,6-	534-52-1	0.49	DNREC-SIRSSCREENING LEVEL TABLE – JULY 2013
Delaware State	Dinoseb	88-85-7	6.1	DNREC-SIRSSCREENING LEVEL TABLE – JULY 2013
Delaware State	Diphenamid	957-51-7	180	DNREC-SIRSSCREENING LEVEL TABLE – JULY 2013
Delaware State	Diphenylamine	122-39-4	150	DNREC-SIRSSCREENING LEVEL TABLE – JULY 2013
Delaware State	Diquat	85-00-7	13	DNREC-SIRSSCREENING LEVEL TABLE – JULY 2013
Delaware State	Disulfoton	298-04-4	0.24	DNREC-SIRSSCREENING LEVEL TABLE – JULY 2013
Delaware State	Diuron	330-54-1	12	DNREC-SIRSSCREENING LEVEL TABLE – JULY 2013
Delaware State	Dodine	2439-10-3	24	DNREC-SIRSSCREENING LEVEL TABLE – JULY 2013
Delaware State	Endosulfan	115-29-7	37	DNREC-SIRSSCREENING LEVEL TABLE – JULY 2013
Delaware State	Endothall	145-73-3	120	DNREC-SIRSSCREENING LEVEL TABLE – JULY 2013
Delaware State	Endrin	72-20-8	1.8	DNREC-SIRSSCREENING LEVEL TABLE – JULY 2013
Delaware State	EPTC	759-94-4	200	DNREC-SIRSSCREENING LEVEL TABLE – JULY 2013
Delaware State	Ethephon	16672-87-0	31	DNREC-SIRSSCREENING LEVEL TABLE – JULY 2013
Delaware State	Ethion	563-12-2	3.1	DNREC-SIRSSCREENING LEVEL TABLE – JULY 2013
Delaware State	Ethylene Diamine	107-15-3	550	DNREC-SIRSSCREENING LEVEL TABLE – JULY 2013
Delaware State	Ethyl-p-nitrophenyl Phosphonate	2104-64-5	0.061	DNREC-SIRSSCREENING LEVEL TABLE – JULY 2013
Delaware State	Express	101200-48-0	49	DNREC-SIRSSCREENING LEVEL TABLE – JULY 2013
Delaware State	Fenamiphos	22224-92-6	1.5	DNREC-SIRSSCREENING LEVEL TABLE – JULY 2013
Delaware State	Fenpropathrin	39515-41-8	150	DNREC-SIRSSCREENING LEVEL TABLE – JULY 2013
Delaware State	Fluometuron	2164-17-2	79	DNREC-SIRSSCREENING LEVEL TABLE – JULY 2013
Delaware State	Fluridone	59756-60-4	490	DNREC-SIRSSCREENING LEVEL TABLE – JULY 2013
Delaware State	Flurprimidol	56425-91-3	120	DNREC-SIRSSCREENING LEVEL TABLE – JULY 2013
Delaware State	Flutolanil	66332-96-5	370	DNREC-SIRSSCREENING LEVEL TABLE – JULY 2013
Delaware State	Fluvalinate	69409-94-5	61	DNREC-SIRSSCREENING LEVEL TABLE – JULY 2013
Delaware State	Folpet	133-07-3	140	DNREC-SIRSSCREENING LEVEL TABLE – JULY 2013
Delaware State	Fomesafen	72178-02-0	2.6	DNREC-SIRSSCREENING LEVEL TABLE – JULY 2013
Delaware State	Fonofos	944-22-9	12	DNREC-SIRSSCREENING LEVEL TABLE – JULY 2013
Delaware State	Formaldehyde	50-00-0	1200	DNREC-SIRSSCREENING LEVEL TABLE – JULY 2013
Delaware State	Formic Acid	64-18-6	4900	DNREC-SIRSSCREENING LEVEL TABLE – JULY 2013
Delaware State	Fosetyl-AL	39148-24-8	18000	DNREC-SIRSSCREENING LEVEL TABLE – JULY 2013
Delaware State	Furazolidone	67-45-8	0.13	DNREC-SIRSSCREENING LEVEL TABLE – JULY 2013
Delaware State	Furium	531-82-8	0.32	DNREC-SIRSSCREENING LEVEL TABLE – JULY 2013
Delaware State	Furmecyclox	60568-05-0	16	DNREC-SIRSSCREENING LEVEL TABLE – JULY 2013
Delaware State	Glufosinate, Ammonium	77182-82-2	2.4	DNREC-SIRSSCREENING LEVEL TABLE – JULY 2013
Delaware State	Glutaraldehyde	111-30-8	11000	DNREC-SIRSSCREENING LEVEL TABLE – JULY 2013
Delaware State	Glyphosate	1071-83-6	610	DNREC-SIRSSCREENING LEVEL TABLE – JULY 2013
Delaware State	Goal	42874-03-3	18	DNREC-SIRSSCREENING LEVEL TABLE – JULY 2013
Delaware State	Guthion	86-50-0	18	DNREC-SIRSSCREENING LEVEL TABLE – JULY 2013
Delaware State	Haloxyfop, Methyl	69806-40-2	0.31	DNREC-SIRSSCREENING LEVEL TABLE – JULY 2013
Delaware State	Harmony	79277-27-3	79	DNREC-SIRSSCREENING LEVEL TABLE – JULY 2013
Delaware State	Heptachlor	76-44-8	0.11	DNREC-SIRSSCREENING LEVEL TABLE – JULY 2013
Delaware State	Heptachlor Epoxide	1024-57-3	0.053	DNREC-SIRSSCREENING LEVEL TABLE – JULY 2013
Delaware State	Hexachlorocyclohexane, Alpha-	319-84-6	0.077	DNREC-SIRSSCREENING LEVEL TABLE – JULY 2013
Delaware State	Hexachlorocyclohexane, Beta-	319-85-7	0.27	DNREC-SIRSSCREENING LEVEL TABLE – JULY 2013
Delaware State	Hexachlorocyclohexane, Gamma- (Lindane)	58-89-9	0.52	DNREC-SIRSSCREENING LEVEL TABLE – JULY 2013
Delaware State	Hexachlorocyclohexane, Technical	608-73-1	0.27	DNREC-SIRSSCREENING LEVEL TABLE – JULY 2013
Delaware State	Hexachlorocyclopentadiene	77-47-4	37	DNREC-SIRSSCREENING LEVEL TABLE – JULY 2013
Delaware State	Hexachlorophene (germicidal soaps)	70-30-4	1.8	DNREC-SIRSSCREENING LEVEL TABLE – JULY 2013
Delaware State	Hexazinone	51235-04-2	200	DNREC-SIRSSCREENING LEVEL TABLE – JULY 2013
Delaware State	Hydrogen Cyanide	74-90-8	2.3	DNREC-SIRSSCREENING LEVEL TABLE – JULY 2013
Delaware State	Imazalil	35554-44-0	79	DNREC-SIRSSCREENING LEVEL TABLE – JULY 2013
Delaware State	Imazaquin	81335-37-7	1500	DNREC-SIRSSCREENING LEVEL TABLE – JULY 2013
Delaware State	Iprodione	36734-19-7	240	DNREC-SIRSSCREENING LEVEL TABLE – JULY 2013
Delaware State	Isopropalin	33820-53-0	92	DNREC-SIRSSCREENING LEVEL TABLE – JULY 2013
Delaware State	Isopropyl Methyl Phosphonic Acid	1832-54-8	610	DNREC-SIRSSCREENING LEVEL TABLE – JULY 2013
Delaware State	Isoxaben	82558-50-7	310	DNREC-SIRSSCREENING LEVEL TABLE – JULY 2013
Delaware State	Kerb	23950-58-5	460	DNREC-SIRSSCREENING LEVEL TABLE – JULY 2013
Delaware State	Lactofen	77501-63-4	12	DNREC-SIRSSCREENING LEVEL TABLE – JULY 2013
Delaware State	Linuron	330-55-2	12	DNREC-SIRSSCREENING LEVEL TABLE – JULY 2013
Delaware State	Londax	83055-99-6	1200	DNREC-SIRSSCREENING LEVEL TABLE – JULY 2013
Delaware State	Malathion	121-75-5	120	DNREC-SIRSSCREENING LEVEL TABLE – JULY 2013
Delaware State	Maleic Anhydride	108-31-6	610	DNREC-SIRSSCREENING LEVEL TABLE – JULY 2013
Delaware State	Maleic Hydrazide	123-33-1	3100	DNREC-SIRSSCREENING LEVEL TABLE – JULY 2013
Delaware State	Mancozeb	8018-01-7	180	DNREC-SIRSSCREENING LEVEL TABLE – JULY 2013
Delaware State	Maneb	12427-38-2	31	DNREC-SIRSSCREENING LEVEL TABLE – JULY 2013
Delaware State	MCPA	94-74-6	3.1	DNREC-SIRSSCREENING LEVEL TABLE – JULY 2013
Delaware State	MCPB	94-81-5	61	DNREC-SIRSSCREENING LEVEL TABLE – JULY 2013
Delaware State	MCPP	93-65-2	6.1	DNREC-SIRSSCREENING LEVEL TABLE – JULY 2013
Delaware State	Mephosfolan	950-10-7	0.55	DNREC-SIRSSCREENING LEVEL TABLE – JULY 2013
Delaware State	Mepiquat Chloride	24307-26-4	180	DNREC-SIRSSCREENING LEVEL TABLE – JULY 2013
Delaware State	Mercuric Chloride	7487-94-7	2.3	DNREC-SIRSSCREENING LEVEL TABLE – JULY 2013
Delaware State	Merphos	150-50-5	0.18	DNREC-SIRSSCREENING LEVEL TABLE – JULY 2013
Delaware State	Merphos Oxide (AKA Tribufos)	78-48-8	0.18	DNREC-SIRSSCREENING LEVEL TABLE – JULY 2013
Delaware State	Metalaxyl	57837-19-1	370	DNREC-SIRSSCREENING LEVEL TABLE – JULY 2013
Delaware State	Methamidophos	10265-92-6	0.31	DNREC-SIRSSCREENING LEVEL TABLE – JULY 2013
Delaware State	Methidathion	950-37-8	6.1	DNREC-SIRSSCREENING LEVEL TABLE – JULY 2013
Delaware State	Methomyl	16752-77-5	150	DNREC-SIRSSCREENING LEVEL TABLE – JULY 2013
Delaware State	Methoxychlor	72-43-5	31	DNREC-SIRSSCREENING LEVEL TABLE – JULY 2013
Delaware State	Methyl Isocyanate	624-83-9	0.5	DNREC-SIRSSCREENING LEVEL TABLE – JULY 2013
Delaware State	Methyl Mercury	22967-92-6	0.78	DNREC-SIRSSCREENING LEVEL TABLE – JULY 2013
Delaware State	Methyl Parathion	298-00-0	1.5	DNREC-SIRSSCREENING LEVEL TABLE – JULY 2013
Delaware State	Methylarsonic acid	124-58-3	61	DNREC-SIRSSCREENING LEVEL TABLE – JULY 2013
[truncated: 10,910 more rows]
[truncated: 1 more columns]

## Sheet: Worldwide Drinking Water MCLs
Country Name	Pesticide Name	CAS No.	Worldwide Pestsicide Drinking Water MCL (mg/l)	Reference
Republic of Albania	Alachlor	15972-60-8	0.02	Albania
Republic of Albania	Aldicarb	116-06-3	0.01	Albania
Republic of Albania	Aldrin and Dieldrin		3e-05	Albania
Republic of Albania	Aldrin	309-00-2	3e-05	Albania
Republic of Albania	Dieldrin	60-57-1	3e-05	Albania
Republic of Albania	Atrazine	1912-24-9	0.002	Albania
Republic of Albania	Bentazon	25057-89-0	0.03	Albania
Republic of Albania	Chlordane	12789-03-6	0.0002	Albania
Republic of Albania	Clorotolunron	15545-48-9	0.03	Albania
Republic of Albania	DDT	50-29-3	0.002	Albania
Republic of Albania	1,2-Dibromo-3 Chloropropan	96-12-8	0.001	Albania
Republic of Albania	2,4-D	94-75-7	0.03	Albania
Republic of Albania	Dichloropropane, 1,2-	78-87-5	0.02	Albania
Republic of Albania	1,3-Dichloropropene	542-75-6	0.02	Albania
Republic of Albania	Heptachlor and epoxide		3e-05	Albania
Republic of Albania	Heptachlor	76-44-8	3e-05	Albania
Republic of Albania	Heptachlor epoxide	1024-57-3	3e-05	Albania
Republic of Albania	Hexachlorobenzne	118-74-1	0.001	Albania
Republic of Albania	Izoproturon	34123-59-6	0.009	Albania
Republic of Albania	Gamma - BHC (Lindane)	58-89-9	0.002	Albania
Republic of Albania	MCPA	94-74-6	0.002	Albania
Republic of Albania	Methoxychlor	72-43-5	0.02	Albania
Republic of Albania	Methachlor	15972-60-8	0.01	Albania
Republic of Albania	Molinate	2212-67-1	0.006	Albania
Republic of Albania	Pendimethalin	40487-42-1	0.02	Albania
Republic of Albania	Pentachlorophenol	87-86-5	0.009	Albania
Republic of Albania	Permethrin	52645-53-1	0.02	Albania
Republic of Albania	Propanil	709-98-8	0.02	Albania
Republic of Albania	Pyridate	55512-33-9	0.1	Albania
Republic of Albania	Simazine	122-34-9	0.02	Albania
Republic of Albania	Trifluralin	1582-09-8	0.02	Albania
Republic of Albania	2,4-DB	94-82-6	0.09	Albania
Republic of Albania	Dichlorprop	120-36-5	0.1	Albania
Republic of Albania	Fenoprop	93-72-1	0.009	Albania
Republic of Albania	Mecoprop	93-65-2	0.01	Albania
Republic of Albania	2,4,5-T	93-76-5	0.009	Albania
Principality of Andorra	one pesticide	000-00-0	0.0001	Andorra
Principality of Andorra	total pesticides	000-00-1	0.0005	Andorra
Antigua and Barbuda	Alachlor	15972-60-8	0.02	WHO
Antigua and Barbuda	Aldicarb	116-06-3	0.01	WHO
Antigua and Barbuda	Aldrin and dieldrin		3e-05	WHO
Antigua and Barbuda	Aldrin	309-00-2	3e-05	WHO
Antigua and Barbuda	Dieldrin	60-57-1	3e-05	WHO
Antigua and Barbuda	Atrazine and its chloro-striazine metabolites		0.1	WHO
Antigua and Barbuda	Atrazine	1912-24-9	0.1	WHO
Antigua and Barbuda	Chlorazine	580-48-3	0.1	WHO
Antigua and Barbuda	Carbofuran	1563-66-2	0.007	WHO
Antigua and Barbuda	Chlordane	57-74-9	0.0002	WHO
Antigua and Barbuda	Chlorpyrifos	2921-88-2	0.03	WHO
Antigua and Barbuda	Cyanazine	21725-46-2	0.0006	WHO
Antigua and Barbuda	2,4-D	94-75-7	0.03	WHO
Antigua and Barbuda	2,4-DB	94-82-6	0.09	WHO
Antigua and Barbuda	DDT and metabolites		0.001	WHO
Antigua and Barbuda	DDD	72-54-8	0.001	WHO
Antigua and Barbuda	DDE, p,p'-	72-55-9	0.001	WHO
Antigua and Barbuda	DDT	50-29-3	0.001	WHO
Antigua and Barbuda	1,2-Dibromo-3-chloropropane	96-12-8	0.001	WHO
Antigua and Barbuda	Dichlorprop	120-36-5	0.1	WHO
Antigua and Barbuda	Dimethoate	60-51-5	0.006	WHO
Antigua and Barbuda	Endrin	72-20-8	0.0006	WHO
Antigua and Barbuda	Epichlorohydrin	106-89-8	0.0004	WHO
Antigua and Barbuda	Fenoprop	93-72-1	0.009	WHO
Antigua and Barbuda	Isoproturon	34123-59-6	0.009	WHO
Antigua and Barbuda	Lindane	58-89-9	0.002	WHO
Antigua and Barbuda	MCPA	94-74-6	0.002	WHO
Antigua and Barbuda	Mecoprop (MCPP)	93-65-2	0.01	WHO
Antigua and Barbuda	Methoxychlor	72-43-5	0.02	WHO
Antigua and Barbuda	Molinate	2212-67-1	0.006	WHO
Antigua and Barbuda	Pendimethalin	40487-42-1	0.02	WHO
Antigua and Barbuda	Pentachlorophenol	87-86-5	0.009	WHO
Antigua and Barbuda	Simazine	122-34-9	0.002	WHO
Antigua and Barbuda	2,4,5-TP(Silvex)	93-72-1	0.009	WHO
Antigua and Barbuda	Terbuthylazine	5915-41-3	0.007	WHO
Antigua and Barbuda	Trifluralin	1582-09-8	0.02	WHO
Argentine Republic	ACROLEIN	107-02-8	0.542	Argentina
Argentine Republic	ALDICARB	116-06-3	0.003	Argentina
Argentine Republic	Aldrin	309-00-2	3e-05	Argentina
Argentine Republic	ATRAZINE	1912-24-9	0.003	Argentina
Argentine Republic	BENDIOCARB	22781-23-3	0.04	Argentina
Argentine Republic	BHC-ALFA	319-84-6	0.000131	Argentina
Argentine Republic	BHC-BETA	319-85-7	0.000232	Argentina
Argentine Republic	GAMA-BHC (Lindane)	58-89-9	0.003	Argentina
Argentine Republic	BIS (2-chloroethyl) Ether	111-44-4	0.00385	Argentina
Argentine Republic	Bromomethane	74-83-9	0.002	Argentina
Argentine Republic	bromoxynil	1689-84-5	0.005	Argentina
Argentine Republic	Carbaryl	63-25-2	0.09	Argentina
Argentine Republic	Carbofuran	1563-66-2	0.04	Argentina
Argentine Republic	Cyanazine	21725-46-2	0.01	Argentina
Argentine Republic	Chlordane,gamma	57-74-9	0.0003	Argentina
Argentine Republic	Chlorpyrifos	2921-88-2	0.09	Argentina
Argentine Republic	DDT	50-29-3	0.001	Argentina
Argentine Republic	Diazinon	333-41-5	0.02	Argentina
Argentine Republic	Dibromochlorpropane (DBCP)	96-12-8	0.0002	Argentina
Argentine Republic	Dicamba	1918-00-9	0.12	Argentina
Argentine Republic	Dichlofop-methyl	51338-27-3	0.009	Argentina
Argentine Republic	Dichloropropane, 1,2-	78-87-5	0.005	Argentina
Argentine Republic	Dieldrin	60-57-1	3e-05	Argentina
Argentine Republic	Dimethoate	60-51-5	0.02	Argentina
Argentine Republic	Diquat	85-00-7	0.07	Argentina
Argentine Republic	Diuron	330-54-1	0.15	Argentina
Argentine Republic	ENDOSULFAN	108-60-1	0.138	Argentina
Argentine Republic	Endrin	72-20-8	0.0002	Argentina
Argentine Republic	Phorate	298-02-2	0.002	Argentina
Argentine Republic	Glyphosate	1071-83-6	0.28	Argentina
Argentine Republic	Heptachlor	76-44-8	0.0001	Argentina
Argentine Republic	Heptachlor epoxide	1024-57-3	0.0001	Argentina
Argentine Republic	Hexachlorocyclopentadiene	77-47-4	0.001	Argentina
Argentine Republic	Malathion	121-75-5	0.19	Argentina
Argentine Republic	Methyl paraoxon	950-35-6	0.007	Argentina
Argentine Republic	Guthion	86-50-0	0.02	Argentina
Argentine Republic	Methoxychlor	72-43-5	0.03	Argentina
Argentine Republic	Metribuzin	21087-64-9	0.08	Argentina
Argentine Republic	Paraquat	4685-14-7	0.01	Argentina
Argentine Republic	Parathion	56-38-2	0.05	Argentina
Argentine Republic	Pentachlorophenol	87-86-5	0.01	Argentina
Argentine Republic	TOTAL PESTICIDES	85-00-7	0.1	Argentina
Argentine Republic	Simazine	122-34-9	0.01	Argentina
Argentine Republic	2,4,5-T	93-76-5	0.28	Argentina
Argentine Republic	Temephos	3383-96-8	0.28	Argentina
Argentine Republic	Terbufos	13071-79-9	0.001	Argentina
Argentine Republic	Toxaphene	8001-35-2	0.005	Argentina
Argentine Republic	2,4,5-TP	93-72-1	0.01	Argentina
Argentine Republic	Triallate	2303-17-5	0.23	Argentina
Commonwealth of Australia	Acephate	30560-19-1	0.008	Australia National standard
Commonwealth of Australia	Aldicarb	116-06-3	0.004	Australia National standard
Commonwealth of Australia	Aldrin & Dieldrin		0.0003	Australia National standard
Commonwealth of Australia	Aldrin	309-00-2	0.0003	Australia National standard
Commonwealth of Australia	Dieldrin	60-57-1	0.0003	Australia National standard
Commonwealth of Australia	Ametryn	834-12-8	0.07	Australia National standard
Commonwealth of Australia	Amitraz	33089-61-1	0.009	Australia National standard
Commonwealth of Australia	Amitrole	61-82-5	0.009	Australia National standard
Commonwealth of Australia	Asulam	3337-71-1	0.07	Australia National standard
Commonwealth of Australia	Atrazine	1912-24-9	0.02	Australia National standard
Commonwealth of Australia	Azinphos-methyl	86-50-0	0.03	Australia National standard
Commonwealth of Australia	Benomyl	17804-35-2	0.09	Australia National standard
Commonwealth of Australia	Bentazon	25057-89-0	0.4	Australia National standard
Commonwealth of Australia	Bioresmetrin	28434-01-7	0.1	Australia National standard
Commonwealth of Australia	Bromacil	314-40-9	0.4	Australia National standard
Commonwealth of Australia	BROMOPHOS-ETHYL	4824-78-6	0.01	Australia National standard
Commonwealth of Australia	bromoxynil	1689-84-5	0.01	Australia National standard
Commonwealth of Australia	Captan	133-06-2	0.4	Australia National standard
Commonwealth of Australia	Carbaryl	63-25-2	0.03	Australia National standard
Commonwealth of Australia	Carbendazim	10605-21-7	0.09	Australia National standard
Commonwealth of Australia	Carfentrazone-ethyl	128639-02-1	0.1	Australia National standard
Commonwealth of Australia	Carbofuran	1563-66-2	0.01	Australia National standard
Commonwealth of Australia	Carbophenothion [or Trithion]	786-19-6	0.0005	Australia National standard
Commonwealth of Australia	Carboxin	5234-68-4	0.3	Australia National standard
Commonwealth of Australia	Chlorantraniliprole	500008-45-7	6	Australia National standard
Commonwealth of Australia	Chlordane	12789-03-6	0.002	Australia National standard
Commonwealth of Australia	Chlorfenvinphos	470-90-6	0.002	Australia National standard
Commonwealth of Australia	Chlorothalonil	1897-45-6	0.05	Australia National standard
Commonwealth of Australia	Chloroxuron	1982-47-4	0.01	Australia National standard
Commonwealth of Australia	Chlorpyrifos	2921-88-2	0.01	Australia National standard
Commonwealth of Australia	Chlorsulfuron	64902-72-3	0.2	Australia National standard
Commonwealth of Australia	Clopyralid	1702-17-6	2	Australia National standard
Commonwealth of Australia	Cyfluthrin	68359-37-5	0.05	Australia National standard
Commonwealth of Australia	Cypermethrin	52315-07-8	0.2	Australia National standard
Commonwealth of Australia	Cyprodinil	121552-61-2	0.09	Australia National standard
Commonwealth of Australia	2,4-D	94-75-7	0.03	Australia National standard
Commonwealth of Australia	DDT	50-29-3	0.009	Australia National standard
Commonwealth of Australia	Deltametrin	52918-63-5	0.04	Australia National standard
Commonwealth of Australia	Diazinon	333-41-5	0.04	Australia National standard
Commonwealth of Australia	Dicamba	1918-00-9	0.1	Australia National standard
Commonwealth of Australia	Dichlobenil	1194-65-6	0.01	Australia National standard
Commonwealth of Australia	1,3-Dichloropropene	542-75-6	0.1	Australia National standard
Commonwealth of Australia	Dichloroprop / Dichlorprop-P		0.1	Australia National standard
Commonwealth of Australia	Dichlorprop	120-36-5	0.1	Australia National standard
Commonwealth of Australia	Dichlorprop-P	15165-67-0	0.1	Australia National standard
Commonwealth of Australia	Dichlorvos	62-73-7	0.005	Australia National standard
Commonwealth of Australia	Dichlofop-methyl	51338-27-3	0.005	Australia National standard
Commonwealth of Australia	Dicofol	115-32-2	0.004	Australia National standard
Commonwealth of Australia	Difenzoquat (Avenge)	43222-48-6	0.1	Australia National standard
Commonwealth of Australia	Diflubenzuron	35367-38-5	0.07	Australia National standard
Commonwealth of Australia	Dimethoate	60-51-5	0.007	Australia National standard
Commonwealth of Australia	Diphenamid	957-51-7	0.3	Australia National standard
Commonwealth of Australia	Diquat	85-00-7	0.007	Australia National standard
Commonwealth of Australia	Disulfoton	298-04-4	0.004	Australia National standard
Commonwealth of Australia	Diuron	330-54-1	0.02	Australia National standard
Commonwealth of Australia	2,2-DPA	75-99-0	0.5	Australia National standard
Commonwealth of Australia	EDB	106-93-4	0.001	Australia National standard
Commonwealth of Australia	Endosulfan	115-29-7	0.02	Australia National standard
Commonwealth of Australia	Endothall	145-73-3	0.1	Australia National standard
Commonwealth of Australia	Epichlorohydrin	106-89-8	0.0005	Australia National standard
Commonwealth of Australia	EPTC	759-94-4	0.3	Australia National standard
Commonwealth of Australia	Esfenvalerate	66230-04-4	0.03	Australia National standard
Commonwealth of Australia	Ethion	563-12-2	0.004	Australia National standard
Commonwealth of Australia	Ethoprophos	13194-48-4	0.001	Australia National standard
Commonwealth of Australia	Etridiazole	2593-15-9	0.1	Australia National standard
Commonwealth of Australia	Fenamiphos	22224-92-6	0.0005	Australia National standard
Commonwealth of Australia	Fenarimol	60168-88-9	0.04	Australia National standard
Commonwealth of Australia	Fenitrotion	122-14-5	0.007	Australia National standard
Commonwealth of Australia	Fenoprop	93-72-1	0.01	Australia National standard
Commonwealth of Australia	Fensulfothion	115-90-2	0.01	Australia National standard
Commonwealth of Australia	Fenthion	55-38-9	0.007	Australia National standard
Commonwealth of Australia	Fenvalerate	51630-58-1	0.06	Australia National standard
Commonwealth of Australia	Fipronil	120068-37-3	0.0007	Australia National standard
Commonwealth of Australia	Flamprop-methyl	52756-25-9	0.004	Australia National standard
Commonwealth of Australia	Fluometuron	2164-17-2	0.07	Australia National standard
Commonwealth of Australia	Fluproponate	22898-01-7	0.009	Australia National standard
Commonwealth of Australia	Formothion	2540-82-1	0.05	Australia National standard
Commonwealth of Australia	Fosamine	59682-52-9	0.03	Australia National standard
Commonwealth of Australia	Glyphosate	1071-83-6	1	Australia National standard
Commonwealth of Australia	Haloxyfop	69806-34-4	0.001	Australia National standard
Commonwealth of Australia	Heptachlor	76-44-8	0.0003	Australia National standard
Commonwealth of Australia	Hexazinone	51235-04-2	0.4	Australia National standard
Commonwealth of Australia	Imazapyr	81334-34-1	9	Australia National standard
Commonwealth of Australia	Iprodione	36734-19-7	0.1	Australia National standard
Commonwealth of Australia	Lindane	58-89-9	0.01	Australia National standard
Commonwealth of Australia	Malathion	121-75-5	0.07	Australia National standard
Commonwealth of Australia	Mancozeb	8018-01-7	0.009	Australia National standard
Commonwealth of Australia	MCPA	94-74-6	0.04	Australia National standard
Commonwealth of Australia	Metaldehyde	108-62-3	0.02	Australia National standard
Commonwealth of Australia	methylisothiocyanate	556-61-6	0.001	Australia National standard
Commonwealth of Australia	Methidathion	950-37-8	0.006	Australia National standard
Commonwealth of Australia	Methiocarb	2032-65-7	0.007	Australia National standard
Commonwealth of Australia	Methomyl	16752-77-5	0.02	Australia National standard
Commonwealth of Australia	Methoxychlor	72-43-5	0.3	Australia National standard
Commonwealth of Australia	Methyl bromide	74-83-9	0.001	Australia National standard
Commonwealth of Australia	Metiram	9006-42-2	0.009	Australia National standard
Commonwealth of Australia	Metolaclor (Dual)	51218-45-2	0.3	Australia National standard
Commonwealth of Australia	Metribuzin	21087-64-9	0.07	Australia National standard
Commonwealth of Australia	Metsulfuron-methyl	74223-64-6	0.04	Australia National standard
Commonwealth of Australia	Mevinphos	7786-34-7	0.005	Australia National standard
Commonwealth of Australia	Molinate	2212-67-1	0.004	Australia National standard
Commonwealth of Australia	MONOCROTOPHOS	6923-22-4	0.002	Australia National standard
Commonwealth of Australia	Napropamide	15299-99-7	0.4	Australia National standard
Commonwealth of Australia	Nicarbazin	330-95-0	1	Australia National standard
Commonwealth of Australia	Nitralin	4726-14-1	0.5	Australia National standard
Commonwealth of Australia	Norflurazon	27314-13-2	0.05	Australia National standard
Commonwealth of Australia	Omethoate	1113-02-6	0.001	Australia National standard
Commonwealth of Australia	Oryzalin	19044-88-3	0.4	Australia National standard
Commonwealth of Australia	Oxamyl (Vydate)	23135-22-0	0.007	Australia National standard
Commonwealth of Australia	Paraquat	4685-14-7	0.02	Australia National standard
Commonwealth of Australia	Parathion	56-38-2	0.02	Australia National standard
Commonwealth of Australia	Parathion-methyl	298-00-0	0.0007	Australia National standard
Commonwealth of Australia	Pebulate	1114-71-2	0.03	Australia National standard
Commonwealth of Australia	Pendimethalin	40487-42-1	0.4	Australia National standard
Commonwealth of Australia	Pentachlorophenol	87-86-5	0.01	Australia National standard
Commonwealth of Australia	Permethrin	52645-53-1	0.2	Australia National standard
Commonwealth of Australia	picloram	1918-02-1	0.3	Australia National standard
Commonwealth of Australia	Piperonyl butoxide	51-03-6	0.6	Australia National standard
Commonwealth of Australia	Pirimikarb	23103-98-2	0.007	Australia National standard
Commonwealth of Australia	Pirimiphos, Methyl	29232-93-7	0.09	Australia National standard
Commonwealth of Australia	Pirimiphos-ethyl	23505-41-1	0.0005	Australia National standard
Commonwealth of Australia	Polihexanide	28757-47-3	0.7	Australia National standard
Commonwealth of Australia	Profenofos	41198-08-7	0.0003	Australia National standard
Commonwealth of Australia	Propachlor	1918-16-7	0.07	Australia National standard
Commonwealth of Australia	Propanil	709-98-8	0.7	Australia National standard
Commonwealth of Australia	Propargite	2312-35-8	0.007	Australia National standard
Commonwealth of Australia	Propazine	139-40-2	0.05	Australia National standard
Commonwealth of Australia	Propiconazole	60207-90-1	0.1	Australia National standard
Commonwealth of Australia	Propyzamide	23950-58-5	0.07	Australia National standard
Commonwealth of Australia	Pyrasulfotole	365400-11-9	0.04	Australia National standard
Commonwealth of Australia	Pyrazophos	13457-18-6	0.02	Australia National standard
Commonwealth of Australia	Pyroxsulam	422556-08-9	4	Australia National standard
Commonwealth of Australia	Quintozene	82-68-8	0.03	Australia National standard
Commonwealth of Australia	Simazine	122-34-9	0.02	Australia National standard
Commonwealth of Australia	Spirotetrama	203313-25-1	0.2	Australia National standard
Commonwealth of Australia	Sulprofos(Bolstar)	35400-43-2	0.01	Australia National standard
Commonwealth of Australia	2,4,5-T	93-76-5	0.1	Australia National standard
Commonwealth of Australia	Temephos	3383-96-8	0.4	Australia National standard
Commonwealth of Australia	Terbacil	5902-51-2	0.2	Australia National standard
Commonwealth of Australia	Terbufos	13071-79-9	0.0009	Australia National standard
Commonwealth of Australia	Terbutilazin	5915-41-3	0.01	Australia National standard
Commonwealth of Australia	Terbutryn	886-50-0	0.4	Australia National standard
Commonwealth of Australia	Tetrachlorvinphos	961-11-5	0.1	Australia National standard
Commonwealth of Australia	Thiobencarb	28249-77-6	0.04	Australia National standard
Commonwealth of Australia	Thiometon	640-15-3	0.004	Australia National standard
Commonwealth of Australia	Thiophanate	23564-06-9	0.005	Australia National standard
Commonwealth of Australia	Thiram	137-26-8	0.007	Australia National standard
Commonwealth of Australia	Toltrazuril	69004-03-1	0.004	Australia National standard
Commonwealth of Australia	Triadimefon	43121-43-3	0.09	Australia National standard
Commonwealth of Australia	Trichlorfon	52-68-6	0.007	Australia National standard
Commonwealth of Australia	Triclopyr	55335-06-3	0.02	Australia National standard
Commonwealth of Australia	Trifluralin	1582-09-8	0.09	Australia National standard
(Austrilia) Austrilian Capital Territory	Acephate	30560-19-1	0.008	Australia National standard
(Austrilia) Austrilian Capital Territory	Aldicarb	116-06-3	0.004	Australia National standard
(Austrilia) Austrilian Capital Territory	Aldrin & Dieldrin		0.0003	Australia National standard
(Austrilia) Austrilian Capital Territory	Aldrin	309-00-2	0.0003	Australia National standard
(Austrilia) Austrilian Capital Territory	Dieldrin	60-57-1	0.0003	Australia National standard
(Austrilia) Austrilian Capital Territory	Ametryn	834-12-8	0.07	Australia National standard
(Austrilia) Austrilian Capital Territory	Amitraz	33089-61-1	0.009	Australia National standard
(Austrilia) Austrilian Capital Territory	Amitrole	61-82-5	0.009	Australia National standard
(Austrilia) Austrilian Capital Territory	Asulam	3337-71-1	0.07	Australia National standard
(Austrilia) Austrilian Capital Territory	Atrazine	1912-24-9	0.02	Australia National standard
(Austrilia) Austrilian Capital Territory	Azinphos-methyl	86-50-0	0.03	Australia National standard
(Austrilia) Austrilian Capital Territory	Benomyl	17804-35-2	0.09	Australia National standard
(Austrilia) Austrilian Capital Territory	Bentazon	25057-89-0	0.4	Australia National standard
(Austrilia) Austrilian Capital Territory	Bioresmetrin	28434-01-7	0.1	Australia National standard
(Austrilia) Austrilian Capital Territory	Bromacil	314-40-9	0.4	Australia National standard
(Austrilia) Austrilian Capital Territory	BROMOPHOS-ETHYL	4824-78-6	0.01	Australia National standard
(Austrilia) Austrilian Capital Territory	bromoxynil	1689-84-5	0.01	Australia National standard
(Austrilia) Austrilian Capital Territory	Captan	133-06-2	0.4	Australia National standard
(Austrilia) Austrilian Capital Territory	Carbaryl	63-25-2	0.03	Australia National standard
(Austrilia) Austrilian Capital Territory	Carbendazim	10605-21-7	0.09	Australia National standard
(Austrilia) Austrilian Capital Territory	Carfentrazone-ethyl	128639-02-1	0.1	Australia National standard
(Austrilia) Austrilian Capital Territory	Carbofuran	1563-66-2	0.01	Australia National standard
(Austrilia) Austrilian Capital Territory	Carbophenothion [or Trithion]	786-19-6	0.0005	Australia National standard
(Austrilia) Austrilian Capital Territory	Carboxin	5234-68-4	0.3	Australia National standard
(Austrilia) Austrilian Capital Territory	Chlorantraniliprole	500008-45-7	6	Australia National standard
(Austrilia) Austrilian Capital Territory	Chlordane	12789-03-6	0.002	Australia National standard
(Austrilia) Austrilian Capital Territory	Chlorfenvinphos	470-90-6	0.002	Australia National standard
(Austrilia) Austrilian Capital Territory	Chlorothalonil	1897-45-6	0.05	Australia National standard
(Austrilia) Austrilian Capital Territory	Chloroxuron	1982-47-4	0.01	Australia National standard
(Austrilia) Austrilian Capital Territory	Chlorpyrifos	2921-88-2	0.01	Australia National standard
(Austrilia) Austrilian Capital Territory	Chlorsulfuron	64902-72-3	0.2	Australia National standard
(Austrilia) Austrilian Capital Territory	Clopyralid	1702-17-6	2	Australia National standard
(Austrilia) Austrilian Capital Territory	Cyfluthrin	68359-37-5	0.05	Australia National standard
(Austrilia) Austrilian Capital Territory	Cypermethrin	52315-07-8	0.2	Australia National standard
(Austrilia) Austrilian Capital Territory	Cyprodinil	121552-61-2	0.09	Australia National standard
(Austrilia) Austrilian Capital Territory	2,4-D	94-75-7	0.03	Australia National standard
(Austrilia) Austrilian Capital Territory	DDT	50-29-3	0.009	Australia National standard
(Austrilia) Austrilian Capital Territory	Deltametrin	52918-63-5	0.04	Australia National standard
(Austrilia) Austrilian Capital Territory	Diazinon	333-41-5	0.04	Australia National standard
(Austrilia) Austrilian Capital Territory	Dicamba	1918-00-9	0.1	Australia National standard
(Austrilia) Austrilian Capital Territory	Dichlobenil	1194-65-6	0.01	Australia National standard
(Austrilia) Austrilian Capital Territory	1,3-Dichloropropene	542-75-6	0.1	Australia National standard
(Austrilia) Austrilian Capital Territory	Dichloroprop / Dichlorprop-P		0.1	Australia National standard
(Austrilia) Austrilian Capital Territory	Dichlorprop	120-36-5	0.1	Australia National standard
(Austrilia) Austrilian Capital Territory	Dichlorprop-P	15165-67-0	0.1	Australia National standard
(Austrilia) Austrilian Capital Territory	Dichlorvos	62-73-7	0.005	Australia National standard
(Austrilia) Austrilian Capital Territory	Dichlofop-methyl	51338-27-3	0.005	Australia National standard
(Austrilia) Austrilian Capital Territory	Dicofol	115-32-2	0.004	Australia National standard
(Austrilia) Austrilian Capital Territory	Difenzoquat (Avenge)	43222-48-6	0.1	Australia National standard
(Austrilia) Austrilian Capital Territory	Diflubenzuron	35367-38-5	0.07	Australia National standard
(Austrilia) Austrilian Capital Territory	Dimethoate	60-51-5	0.007	Australia National standard
(Austrilia) Austrilian Capital Territory	Diphenamid	957-51-7	0.3	Australia National standard
(Austrilia) Austrilian Capital Territory	Diquat	85-00-7	0.007	Australia National standard
(Austrilia) Austrilian Capital Territory	Disulfoton	298-04-4	0.004	Australia National standard
(Austrilia) Austrilian Capital Territory	Diuron	330-54-1	0.02	Australia National standard
(Austrilia) Austrilian Capital Territory	2,2-DPA	75-99-0	0.5	Australia National standard
(Austrilia) Austrilian Capital Territory	EDB	106-93-4	0.001	Australia National standard
(Austrilia) Austrilian Capital Territory	Endosulfan	115-29-7	0.02	Australia National standard
(Austrilia) Austrilian Capital Territory	Endothall	145-73-3	0.1	Australia National standard
(Austrilia) Austrilian Capital Territory	Epichlorohydrin	106-89-8	0.0005	Australia National standard
(Austrilia) Austrilian Capital Territory	EPTC	759-94-4	0.3	Australia National standard
(Austrilia) Austrilian Capital Territory	Esfenvalerate	66230-04-4	0.03	Australia National standard
(Austrilia) Austrilian Capital Territory	Ethion	563-12-2	0.004	Australia National standard
(Austrilia) Austrilian Capital Territory	Ethoprophos	13194-48-4	0.001	Australia National standard
(Austrilia) Austrilian Capital Territory	Etridiazole	2593-15-9	0.1	Australia National standard
(Austrilia) Austrilian Capital Territory	Fenamiphos	22224-92-6	0.0005	Australia National standard
(Austrilia) Austrilian Capital Territory	Fenarimol	60168-88-9	0.04	Australia National standard
(Austrilia) Austrilian Capital Territory	Fenitrotion	122-14-5	0.007	Australia National standard
(Austrilia) Austrilian Capital Territory	Fenoprop	93-72-1	0.01	Australia National standard
(Austrilia) Austrilian Capital Territory	Fensulfothion	115-90-2	0.01	Australia National standard
(Austrilia) Austrilian Capital Territory	Fenthion	55-38-9	0.007	Australia National standard
(Austrilia) Austrilian Capital Territory	Fenvalerate	51630-58-1	0.06	Australia National standard
(Austrilia) Austrilian Capital Territory	Fipronil	120068-37-3	0.0007	Australia National standard
(Austrilia) Austrilian Capital Territory	Flamprop-methyl	52756-25-9	0.004	Australia National standard
(Austrilia) Austrilian Capital Territory	Fluometuron	2164-17-2	0.07	Australia National standard
(Austrilia) Austrilian Capital Territory	Fluproponate	22898-01-7	0.009	Australia National standard
(Austrilia) Austrilian Capital Territory	Formothion	2540-82-1	0.05	Australia National standard
(Austrilia) Austrilian Capital Territory	Fosamine	59682-52-9	0.03	Australia National standard
(Austrilia) Austrilian Capital Territory	Glyphosate	1071-83-6	1	Australia National standard
(Austrilia) Austrilian Capital Territory	Haloxyfop	69806-34-4	0.001	Australia National standard
(Austrilia) Austrilian Capital Territory	Heptachlor	76-44-8	0.0003	Australia National standard
(Austrilia) Austrilian Capital Territory	Hexazinone	51235-04-2	0.4	Australia National standard
(Austrilia) Austrilian Capital Territory	Imazapyr	81334-34-1	9	Australia National standard
(Austrilia) Austrilian Capital Territory	Iprodione	36734-19-7	0.1	Australia National standard
(Austrilia) Austrilian Capital Territory	Lindane	58-89-9	0.01	Australia National standard
(Austrilia) Austrilian Capital Territory	Malathion	121-75-5	0.07	Australia National standard
(Austrilia) Austrilian Capital Territory	Mancozeb	8018-01-7	0.009	Australia National standard
(Austrilia) Austrilian Capital Territory	MCPA	94-74-6	0.04	Australia National standard
(Austrilia) Austrilian Capital Territory	Metaldehyde	108-62-3	0.02	Australia National standard
(Austrilia) Austrilian Capital Territory	methylisothiocyanate	556-61-6	0.001	Australia National standard
(Austrilia) Austrilian Capital Territory	Methidathion	950-37-8	0.006	Australia National standard
(Austrilia) Austrilian Capital Territory	Methiocarb	2032-65-7	0.007	Australia National standard
(Austrilia) Austrilian Capital Territory	Methomyl	16752-77-5	0.02	Australia National standard
(Austrilia) Austrilian Capital Territory	Methoxychlor	72-43-5	0.3	Australia National standard
(Austrilia) Austrilian Capital Territory	Methyl bromide	74-83-9	0.001	Australia National standard
(Austrilia) Austrilian Capital Territory	Metiram	9006-42-2	0.009	Australia National standard
(Austrilia) Austrilian Capital Territory	Metolaclor (Dual)	51218-45-2	0.3	Australia National standard
(Austrilia) Austrilian Capital Territory	Metribuzin	21087-64-9	0.07	Australia National standard
(Austrilia) Austrilian Capital Territory	Metsulfuron-methyl	74223-64-6	0.04	Australia National standard
(Austrilia) Austrilian Capital Territory	Mevinphos	7786-34-7	0.005	Australia National standard
(Austrilia) Austrilian Capital Territory	Molinate	2212-67-1	0.004	Australia National standard
(Austrilia) Austrilian Capital Territory	MONOCROTOPHOS	6923-22-4	0.002	Australia National standard
(Austrilia) Austrilian Capital Territory	Napropamide	15299-99-7	0.4	Australia National standard
(Austrilia) Austrilian Capital Territory	Nicarbazin	330-95-0	1	Australia National standard
(Austrilia) Austrilian Capital Territory	Nitralin	4726-14-1	0.5	Australia National standard
(Austrilia) Austrilian Capital Territory	Norflurazon	27314-13-2	0.05	Australia National standard
(Austrilia) Austrilian Capital Territory	Omethoate	1113-02-6	0.001	Australia National standard
(Austrilia) Austrilian Capital Territory	Oryzalin	19044-88-3	0.4	Australia National standard
(Austrilia) Austrilian Capital Territory	Oxamyl (Vydate)	23135-22-0	0.007	Australia National standard
(Austrilia) Austrilian Capital Territory	Paraquat	4685-14-7	0.02	Australia National standard
(Austrilia) Austrilian Capital Territory	Parathion	56-38-2	0.02	Australia National standard
(Austrilia) Austrilian Capital Territory	Parathion-methyl	298-00-0	0.0007	Australia National standard
(Austrilia) Austrilian Capital Territory	Pebulate	1114-71-2	0.03	Australia National standard
(Austrilia) Austrilian Capital Territory	Pendimethalin	40487-42-1	0.4	Australia National standard
(Austrilia) Austrilian Capital Territory	Pentachlorophenol	87-86-5	0.01	Australia National standard
(Austrilia) Austrilian Capital Territory	Permethrin	52645-53-1	0.2	Australia National standard
(Austrilia) Austrilian Capital Territory	picloram	1918-02-1	0.3	Australia National standard
(Austrilia) Austrilian Capital Territory	Piperonyl butoxide	51-03-6	0.6	Australia National standard
(Austrilia) Austrilian Capital Territory	Pirimikarb	23103-98-2	0.007	Australia National standard
(Austrilia) Austrilian Capital Territory	Pirimiphos, Methyl	29232-93-7	0.09	Australia National standard
(Austrilia) Austrilian Capital Territory	Pirimiphos-ethyl	23505-41-1	0.0005	Australia National standard
(Austrilia) Austrilian Capital Territory	Polihexanide	28757-47-3	0.7	Australia National standard
(Austrilia) Austrilian Capital Territory	Profenofos	41198-08-7	0.0003	Australia National standard
(Austrilia) Austrilian Capital Territory	Propachlor	1918-16-7	0.07	Australia National standard
(Austrilia) Austrilian Capital Territory	Propanil	709-98-8	0.7	Australia National standard
(Austrilia) Austrilian Capital Territory	Propargite	2312-35-8	0.007	Australia National standard
(Austrilia) Austrilian Capital Territory	Propazine	139-40-2	0.05	Australia National standard
(Austrilia) Austrilian Capital Territory	Propiconazole	60207-90-1	0.1	Australia National standard
(Austrilia) Austrilian Capital Territory	Propyzamide	23950-58-5	0.07	Australia National standard
(Austrilia) Austrilian Capital Territory	Pyrasulfotole	365400-11-9	0.04	Australia National standard
(Austrilia) Austrilian Capital Territory	Pyrazophos	13457-18-6	0.02	Australia National standard
(Austrilia) Austrilian Capital Territory	Pyroxsulam	422556-08-9	4	Australia National standard
(Austrilia) Austrilian Capital Territory	Quintozene	82-68-8	0.03	Australia National standard
(Austrilia) Austrilian Capital Territory	Simazine	122-34-9	0.02	Australia National standard
(Austrilia) Austrilian Capital Territory	Spirotetrama	203313-25-1	0.2	Australia National standard
(Austrilia) Austrilian Capital Territory	Sulprofos(Bolstar)	35400-43-2	0.01	Australia National standard
(Austrilia) Austrilian Capital Territory	2,4,5-T	93-76-5	0.1	Australia National standard
(Austrilia) Austrilian Capital Territory	Temephos	3383-96-8	0.4	Australia National standard
(Austrilia) Austrilian Capital Territory	Terbacil	5902-51-2	0.2	Australia National standard
(Austrilia) Austrilian Capital Territory	Terbufos	13071-79-9	0.0009	Australia National standard
(Austrilia) Austrilian Capital Territory	Terbutilazin	5915-41-3	0.01	Australia National standard
(Austrilia) Austrilian Capital Territory	Terbutryn	886-50-0	0.4	Australia National standard
(Austrilia) Austrilian Capital Territory	Tetrachlorvinphos	961-11-5	0.1	Australia National standard
(Austrilia) Austrilian Capital Territory	Thiobencarb	28249-77-6	0.04	Australia National standard
(Austrilia) Austrilian Capital Territory	Thiometon	640-15-3	0.004	Australia National standard
(Austrilia) Austrilian Capital Territory	Thiophanate	23564-06-9	0.005	Australia National standard
(Austrilia) Austrilian Capital Territory	Thiram	137-26-8	0.007	Australia National standard
(Austrilia) Austrilian Capital Territory	Toltrazuril	69004-03-1	0.004	Australia National standard
(Austrilia) Austrilian Capital Territory	Triadimefon	43121-43-3	0.09	Australia National standard
(Austrilia) Austrilian Capital Territory	Trichlorfon	52-68-6	0.007	Australia National standard
(Austrilia) Austrilian Capital Territory	Triclopyr	55335-06-3	0.02	Australia National standard
(Austrilia) Austrilian Capital Territory	Trifluralin	1582-09-8	0.09	Australia National standard
(Australia) State of Tasmania	Acephate	30560-19-1	0.008	Australia National standard
(Australia) State of Tasmania	Aldicarb	116-06-3	0.004	Australia National standard
(Australia) State of Tasmania	Aldrin & Dieldrin		0.0003	Australia National standard
(Australia) State of Tasmania	Aldrin	309-00-2	0.0003	Australia National standard
(Australia) State of Tasmania	Dieldrin	60-57-1	0.0003	Australia National standard
(Australia) State of Tasmania	Ametryn	834-12-8	0.07	Australia National standard
(Australia) State of Tasmania	Amitraz	33089-61-1	0.009	Australia National standard
(Australia) State of Tasmania	Amitrole	61-82-5	0.009	Australia National standard
(Australia) State of Tasmania	Asulam	3337-71-1	0.07	Australia National standard
(Australia) State of Tasmania	Atrazine	1912-24-9	0.02	Australia National standard
(Australia) State of Tasmania	Azinphos-methyl	86-50-0	0.03	Australia National standard
(Australia) State of Tasmania	Benomyl	17804-35-2	0.09	Australia National standard
(Australia) State of Tasmania	Bentazon	25057-89-0	0.4	Australia National standard
(Australia) State of Tasmania	Bioresmetrin	28434-01-7	0.1	Australia National standard
(Australia) State of Tasmania	Bromacil	314-40-9	0.4	Australia National standard
(Australia) State of Tasmania	BROMOPHOS-ETHYL	4824-78-6	0.01	Australia National standard
(Australia) State of Tasmania	bromoxynil	1689-84-5	0.01	Australia National standard
(Australia) State of Tasmania	Captan	133-06-2	0.4	Australia National standard
(Australia) State of Tasmania	Carbaryl	63-25-2	0.03	Australia National standard
(Australia) State of Tasmania	Carbendazim	10605-21-7	0.09	Australia National standard
(Australia) State of Tasmania	Carfentrazone-ethyl	128639-02-1	0.1	Australia National standard
(Australia) State of Tasmania	Carbofuran	1563-66-2	0.01	Australia National standard
(Australia) State of Tasmania	Carbophenothion [or Trithion]	786-19-6	0.0005	Australia National standard
(Australia) State of Tasmania	Carboxin	5234-68-4	0.3	Australia National standard
(Australia) State of Tasmania	Chlorantraniliprole	500008-45-7	6	Australia National standard
(Australia) State of Tasmania	Chlordane	12789-03-6	0.002	Australia National standard
(Australia) State of Tasmania	Chlorfenvinphos	470-90-6	0.002	Australia National standard
(Australia) State of Tasmania	Chlorothalonil	1897-45-6	0.05	Australia National standard
(Australia) State of Tasmania	Chloroxuron	1982-47-4	0.01	Australia National standard
(Australia) State of Tasmania	Chlorpyrifos	2921-88-2	0.01	Australia National standard
(Australia) State of Tasmania	Chlorsulfuron	64902-72-3	0.2	Australia National standard
(Australia) State of Tasmania	Clopyralid	1702-17-6	2	Australia National standard
(Australia) State of Tasmania	Cyfluthrin	68359-37-5	0.05	Australia National standard
(Australia) State of Tasmania	Cypermethrin	52315-07-8	0.2	Australia National standard
(Australia) State of Tasmania	Cyprodinil	121552-61-2	0.09	Australia National standard
(Australia) State of Tasmania	2,4-D	94-75-7	0.03	Australia National standard
(Australia) State of Tasmania	DDT	50-29-3	0.009	Australia National standard
(Australia) State of Tasmania	Deltametrin	52918-63-5	0.04	Australia National standard
(Australia) State of Tasmania	Diazinon	333-41-5	0.04	Australia National standard
(Australia) State of Tasmania	Dicamba	1918-00-9	0.1	Australia National standard
(Australia) State of Tasmania	Dichlobenil	1194-65-6	0.01	Australia National standard
(Australia) State of Tasmania	1,3-Dichloropropene	542-75-6	0.1	Australia National standard
(Australia) State of Tasmania	Dichloroprop / Dichlorprop-P		0.1	Australia National standard
(Australia) State of Tasmania	Dichlorprop	120-36-5	0.1	Australia National standard
(Australia) State of Tasmania	Dichlorprop-P	15165-67-0	0.1	Australia National standard
(Australia) State of Tasmania	Dichlorvos	62-73-7	0.005	Australia National standard
(Australia) State of Tasmania	Dichlofop-methyl	51338-27-3	0.005	Australia National standard
(Australia) State of Tasmania	Dicofol	115-32-2	0.004	Australia National standard
(Australia) State of Tasmania	Difenzoquat (Avenge)	43222-48-6	0.1	Australia National standard
(Australia) State of Tasmania	Diflubenzuron	35367-38-5	0.07	Australia National standard
(Australia) State of Tasmania	Dimethoate	60-51-5	0.007	Australia National standard
(Australia) State of Tasmania	Diphenamid	957-51-7	0.3	Australia National standard
(Australia) State of Tasmania	Diquat	85-00-7	0.007	Australia National standard
(Australia) State of Tasmania	Disulfoton	298-04-4	0.004	Australia National standard
(Australia) State of Tasmania	Diuron	330-54-1	0.02	Australia National standard
(Australia) State of Tasmania	2,2-DPA	75-99-0	0.5	Australia National standard
(Australia) State of Tasmania	EDB	106-93-4	0.001	Australia National standard
(Australia) State of Tasmania	Endosulfan	115-29-7	0.02	Australia National standard
(Australia) State of Tasmania	Endothall	145-73-3	0.1	Australia National standard
(Australia) State of Tasmania	Epichlorohydrin	106-89-8	0.0005	Australia National standard
(Australia) State of Tasmania	EPTC	759-94-4	0.3	Australia National standard
(Australia) State of Tasmania	Esfenvalerate	66230-04-4	0.03	Australia National standard
(Australia) State of Tasmania	Ethion	563-12-2	0.004	Australia National standard
(Australia) State of Tasmania	Ethoprophos	13194-48-4	0.001	Australia National standard
(Australia) State of Tasmania	Etridiazole	2593-15-9	0.1	Australia National standard
(Australia) State of Tasmania	Fenamiphos	22224-92-6	0.0005	Australia National standard
(Australia) State of Tasmania	Fenarimol	60168-88-9	0.04	Australia National standard
(Australia) State of Tasmania	Fenitrotion	122-14-5	0.007	Australia National standard
(Australia) State of Tasmania	Fenoprop	93-72-1	0.01	Australia National standard
(Australia) State of Tasmania	Fensulfothion	115-90-2	0.01	Australia National standard
(Australia) State of Tasmania	Fenthion	55-38-9	0.007	Australia National standard
(Australia) State of Tasmania	Fenvalerate	51630-58-1	0.06	Australia National standard
(Australia) State of Tasmania	Fipronil	120068-37-3	0.0007	Australia National standard
(Australia) State of Tasmania	Flamprop-methyl	52756-25-9	0.004	Australia National standard
(Australia) State of Tasmania	Fluometuron	2164-17-2	0.07	Australia National standard
(Australia) State of Tasmania	Fluproponate	22898-01-7	0.009	Australia National standard
(Australia) State of Tasmania	Formothion	2540-82-1	0.05	Australia National standard
(Australia) State of Tasmania	Fosamine	59682-52-9	0.03	Australia National standard
(Australia) State of Tasmania	Glyphosate	1071-83-6	1	Australia National standard
(Australia) State of Tasmania	Haloxyfop	69806-34-4	0.001	Australia National standard
(Australia) State of Tasmania	Heptachlor	76-44-8	0.0003	Australia National standard
(Australia) State of Tasmania	Hexazinone	51235-04-2	0.4	Australia National standard
(Australia) State of Tasmania	Imazapyr	81334-34-1	9	Australia National standard
(Australia) State of Tasmania	Iprodione	36734-19-7	0.1	Australia National standard
(Australia) State of Tasmania	Lindane	58-89-9	0.01	Australia National standard
(Australia) State of Tasmania	Malathion	121-75-5	0.07	Australia National standard
(Australia) State of Tasmania	Mancozeb	8018-01-7	0.009	Australia National standard
(Australia) State of Tasmania	MCPA	94-74-6	0.04	Australia National standard
(Australia) State of Tasmania	Metaldehyde	108-62-3	0.02	Australia National standard
(Australia) State of Tasmania	methylisothiocyanate	556-61-6	0.001	Australia National standard
(Australia) State of Tasmania	Methidathion	950-37-8	0.006	Australia National standard
(Australia) State of Tasmania	Methiocarb	2032-65-7	0.007	Australia National standard
(Australia) State of Tasmania	Methomyl	16752-77-5	0.02	Australia National standard
(Australia) State of Tasmania	Methoxychlor	72-43-5	0.3	Australia National standard
(Australia) State of Tasmania	Methyl bromide	74-83-9	0.001	Australia National standard
(Australia) State of Tasmania	Metiram	9006-42-2	0.009	Australia National standard
(Australia) State of Tasmania	Metolaclor (Dual)	51218-45-2	0.3	Australia National standard
(Australia) State of Tasmania	Metribuzin	21087-64-9	0.07	Australia National standard
(Australia) State of Tasmania	Metsulfuron-methyl	74223-64-6	0.04	Australia National standard
(Australia) State of Tasmania	Mevinphos	7786-34-7	0.005	Australia National standard
(Australia) State of Tasmania	Molinate	2212-67-1	0.004	Australia National standard
(Australia) State of Tasmania	MONOCROTOPHOS	6923-22-4	0.002	Australia National standard
(Australia) State of Tasmania	Napropamide	15299-99-7	0.4	Australia National standard
(Australia) State of Tasmania	Nicarbazin	330-95-0	1	Australia National standard
(Australia) State of Tasmania	Nitralin	4726-14-1	0.5	Australia National standard
(Australia) State of Tasmania	Norflurazon	27314-13-2	0.05	Australia National standard
(Australia) State of Tasmania	Omethoate	1113-02-6	0.001	Australia National standard
(Australia) State of Tasmania	Oryzalin	19044-88-3	0.4	Australia National standard
(Australia) State of Tasmania	Oxamyl (Vydate)	23135-22-0	0.007	Australia National standard
(Australia) State of Tasmania	Paraquat	4685-14-7	0.02	Australia National standard
(Australia) State of Tasmania	Parathion	56-38-2	0.02	Australia National standard
(Australia) State of Tasmania	Parathion-methyl	298-00-0	0.0007	Australia National standard
(Australia) State of Tasmania	Pebulate	1114-71-2	0.03	Australia National standard
(Australia) State of Tasmania	Pendimethalin	40487-42-1	0.4	Australia National standard
(Australia) State of Tasmania	Pentachlorophenol	87-86-5	0.01	Australia National standard
(Australia) State of Tasmania	Permethrin	52645-53-1	0.2	Australia National standard
(Australia) State of Tasmania	picloram	1918-02-1	0.3	Australia National standard
(Australia) State of Tasmania	Piperonyl butoxide	51-03-6	0.6	Australia National standard
(Australia) State of Tasmania	Pirimikarb	23103-98-2	0.007	Australia National standard
(Australia) State of Tasmania	Pirimiphos, Methyl	29232-93-7	0.09	Australia National standard
(Australia) State of Tasmania	Pirimiphos-ethyl	23505-41-1	0.0005	Australia National standard
(Australia) State of Tasmania	Polihexanide	28757-47-3	0.7	Australia National standard
(Australia) State of Tasmania	Profenofos	41198-08-7	0.0003	Australia National standard
(Australia) State of Tasmania	Propachlor	1918-16-7	0.07	Australia National standard
(Australia) State of Tasmania	Propanil	709-98-8	0.7	Australia National standard
(Australia) State of Tasmania	Propargite	2312-35-8	0.007	Australia National standard
(Australia) State of Tasmania	Propazine	139-40-2	0.05	Australia National standard
(Australia) State of Tasmania	Propiconazole	60207-90-1	0.1	Australia National standard
(Australia) State of Tasmania	Propyzamide	23950-58-5	0.07	Australia National standard
(Australia) State of Tasmania	Pyrasulfotole	365400-11-9	0.04	Australia National standard
(Australia) State of Tasmania	Pyrazophos	13457-18-6	0.02	Australia National standard
(Australia) State of Tasmania	Pyroxsulam	422556-08-9	4	Australia National standard
(Australia) State of Tasmania	Quintozene	82-68-8	0.03	Australia National standard
(Australia) State of Tasmania	Simazine	122-34-9	0.02	Australia National standard
(Australia) State of Tasmania	Spirotetrama	203313-25-1	0.2	Australia National standard
(Australia) State of Tasmania	Sulprofos(Bolstar)	35400-43-2	0.01	Australia National standard
(Australia) State of Tasmania	2,4,5-T	93-76-5	0.1	Australia National standard
(Australia) State of Tasmania	Temephos	3383-96-8	0.4	Australia National standard
(Australia) State of Tasmania	Terbacil	5902-51-2	0.2	Australia National standard
(Australia) State of Tasmania	Terbufos	13071-79-9	0.0009	Australia National standard
(Australia) State of Tasmania	Terbutilazin	5915-41-3	0.01	Australia National standard
(Australia) State of Tasmania	Terbutryn	886-50-0	0.4	Australia National standard
(Australia) State of Tasmania	Tetrachlorvinphos	961-11-5	0.1	Australia National standard
(Australia) State of Tasmania	Thiobencarb	28249-77-6	0.04	Australia National standard
(Australia) State of Tasmania	Thiometon	640-15-3	0.004	Australia National standard
(Australia) State of Tasmania	Thiophanate	23564-06-9	0.005	Australia National standard
(Australia) State of Tasmania	Thiram	137-26-8	0.007	Australia National standard
(Australia) State of Tasmania	Toltrazuril	69004-03-1	0.004	Australia National standard
(Australia) State of Tasmania	Triadimefon	43121-43-3	0.09	Australia National standard
(Australia) State of Tasmania	Trichlorfon	52-68-6	0.007	Australia National standard
(Australia) State of Tasmania	Triclopyr	55335-06-3	0.02	Australia National standard
(Australia) State of Tasmania	Trifluralin	1582-09-8	0.09	Australia National standard
(Australia) State of New South Wales	Acephate	30560-19-1	0.008	Australia National standard
(Australia) State of New South Wales	Aldicarb	116-06-3	0.004	Australia National standard
(Australia) State of New South Wales	Aldrin & Dieldrin		0.0003	Australia National standard
(Australia) State of New South Wales	Aldrin	309-00-2	0.0003	Australia National standard
(Australia) State of New South Wales	Dieldrin	60-57-1	0.0003	Australia National standard
(Australia) State of New South Wales	Ametryn	834-12-8	0.07	Australia National standard
(Australia) State of New South Wales	Amitraz	33089-61-1	0.009	Australia National standard
(Australia) State of New South Wales	Amitrole	61-82-5	0.009	Australia National standard
(Australia) State of New South Wales	Asulam	3337-71-1	0.07	Australia National standard
(Australia) State of New South Wales	Atrazine	1912-24-9	0.02	Australia National standard
(Australia) State of New South Wales	Azinphos-methyl	86-50-0	0.03	Australia National standard
(Australia) State of New South Wales	Benomyl	17804-35-2	0.09	Australia National standard
(Australia) State of New South Wales	Bentazon	25057-89-0	0.4	Australia National standard
(Australia) State of New South Wales	Bioresmetrin	28434-01-7	0.1	Australia National standard
(Australia) State of New South Wales	Bromacil	314-40-9	0.4	Australia National standard
(Australia) State of New South Wales	BROMOPHOS-ETHYL	4824-78-6	0.01	Australia National standard
(Australia) State of New South Wales	bromoxynil	1689-84-5	0.01	Australia National standard
(Australia) State of New South Wales	Captan	133-06-2	0.4	Australia National standard
(Australia) State of New South Wales	Carbaryl	63-25-2	0.03	Australia National standard
(Australia) State of New South Wales	Carbendazim	10605-21-7	0.09	Australia National standard
(Australia) State of New South Wales	Carfentrazone-ethyl	128639-02-1	0.1	Australia National standard
(Australia) State of New South Wales	Carbofuran	1563-66-2	0.01	Australia National standard
(Australia) State of New South Wales	Carbophenothion [or Trithion]	786-19-6	0.0005	Australia National standard
(Australia) State of New South Wales	Carboxin	5234-68-4	0.3	Australia National standard
(Australia) State of New South Wales	Chlorantraniliprole	500008-45-7	6	Australia National standard
(Australia) State of New South Wales	Chlordane	12789-03-6	0.002	Australia National standard
(Australia) State of New South Wales	Chlorfenvinphos	470-90-6	0.002	Australia National standard
(Australia) State of New South Wales	Chlorothalonil	1897-45-6	0.05	Australia National standard
(Australia) State of New South Wales	Chloroxuron	1982-47-4	0.01	Australia National standard
(Australia) State of New South Wales	Chlorpyrifos	2921-88-2	0.01	Australia National standard
(Australia) State of New South Wales	Chlorsulfuron	64902-72-3	0.2	Australia National standard
(Australia) State of New South Wales	Clopyralid	1702-17-6	2	Australia National standard
(Australia) State of New South Wales	Cyfluthrin	68359-37-5	0.05	Australia National standard
(Australia) State of New South Wales	Cypermethrin	52315-07-8	0.2	Australia National standard
(Australia) State of New South Wales	Cyprodinil	121552-61-2	0.09	Australia National standard
(Australia) State of New South Wales	2,4-D	94-75-7	0.03	Australia National standard
(Australia) State of New South Wales	DDT	50-29-3	0.009	Australia National standard
(Australia) State of New South Wales	Deltametrin	52918-63-5	0.04	Australia National standard
(Australia) State of New South Wales	Diazinon	333-41-5	0.04	Australia National standard
(Australia) State of New South Wales	Dicamba	1918-00-9	0.1	Australia National standard
(Australia) State of New South Wales	Dichlobenil	1194-65-6	0.01	Australia National standard
(Australia) State of New South Wales	1,3-Dichloropropene	542-75-6	0.1	Australia National standard
(Australia) State of New South Wales	Dichloroprop / Dichlorprop-P		0.1	Australia National standard
(Australia) State of New South Wales	Dichlorprop	120-36-5	0.1	Australia National standard
(Australia) State of New South Wales	Dichlorprop-P	15165-67-0	0.1	Australia National standard
(Australia) State of New South Wales	Dichlorvos	62-73-7	0.005	Australia National standard
(Australia) State of New South Wales	Dichlofop-methyl	51338-27-3	0.005	Australia National standard
(Australia) State of New South Wales	Dicofol	115-32-2	0.004	Australia National standard
(Australia) State of New South Wales	Difenzoquat (Avenge)	43222-48-6	0.1	Australia National standard
(Australia) State of New South Wales	Diflubenzuron	35367-38-5	0.07	Australia National standard
(Australia) State of New South Wales	Dimethoate	60-51-5	0.007	Australia National standard
(Australia) State of New South Wales	Diphenamid	957-51-7	0.3	Australia National standard
(Australia) State of New South Wales	Diquat	85-00-7	0.007	Australia National standard
(Australia) State of New South Wales	Disulfoton	298-04-4	0.004	Australia National standard
(Australia) State of New South Wales	Diuron	330-54-1	0.02	Australia National standard
(Australia) State of New South Wales	2,2-DPA	75-99-0	0.5	Australia National standard
(Australia) State of New South Wales	EDB	106-93-4	0.001	Australia National standard
(Australia) State of New South Wales	Endosulfan	115-29-7	0.02	Australia National standard
(Australia) State of New South Wales	Endothall	145-73-3	0.1	Australia National standard
(Australia) State of New South Wales	Epichlorohydrin	106-89-8	0.0005	Australia National standard
(Australia) State of New South Wales	EPTC	759-94-4	0.3	Australia National standard
(Australia) State of New South Wales	Esfenvalerate	66230-04-4	0.03	Australia National standard
(Australia) State of New South Wales	Ethion	563-12-2	0.004	Australia National standard
(Australia) State of New South Wales	Ethoprophos	13194-48-4	0.001	Australia National standard
(Australia) State of New South Wales	Etridiazole	2593-15-9	0.1	Australia National standard
(Australia) State of New South Wales	Fenamiphos	22224-92-6	0.0005	Australia National standard
(Australia) State of New South Wales	Fenarimol	60168-88-9	0.04	Australia National standard
(Australia) State of New South Wales	Fenitrotion	122-14-5	0.007	Australia National standard
(Australia) State of New South Wales	Fenoprop	93-72-1	0.01	Australia National standard
(Australia) State of New South Wales	Fensulfothion	115-90-2	0.01	Australia National standard
(Australia) State of New South Wales	Fenthion	55-38-9	0.007	Australia National standard
(Australia) State of New South Wales	Fenvalerate	51630-58-1	0.06	Australia National standard
(Australia) State of New South Wales	Fipronil	120068-37-3	0.0007	Australia National standard
(Australia) State of New South Wales	Flamprop-methyl	52756-25-9	0.004	Australia National standard
(Australia) State of New South Wales	Fluometuron	2164-17-2	0.07	Australia National standard
(Australia) State of New South Wales	Fluproponate	22898-01-7	0.009	Australia National standard
(Australia) State of New South Wales	Formothion	2540-82-1	0.05	Australia National standard
(Australia) State of New South Wales	Fosamine	59682-52-9	0.03	Australia National standard
(Australia) State of New South Wales	Glyphosate	1071-83-6	1	Australia National standard
(Australia) State of New South Wales	Haloxyfop	69806-34-4	0.001	Australia National standard
(Australia) State of New South Wales	Heptachlor	76-44-8	0.0003	Australia National standard
(Australia) State of New South Wales	Hexazinone	51235-04-2	0.4	Australia National standard
(Australia) State of New South Wales	Imazapyr	81334-34-1	9	Australia National standard
(Australia) State of New South Wales	Iprodione	36734-19-7	0.1	Australia National standard
(Australia) State of New South Wales	Lindane	58-89-9	0.01	Australia National standard
(Australia) State of New South Wales	Malathion	121-75-5	0.07	Australia National standard
(Australia) State of New South Wales	Mancozeb	8018-01-7	0.009	Australia National standard
(Australia) State of New South Wales	MCPA	94-74-6	0.04	Australia National standard
(Australia) State of New South Wales	Metaldehyde	108-62-3	0.02	Australia National standard
(Australia) State of New South Wales	methylisothiocyanate	556-61-6	0.001	Australia National standard
(Australia) State of New South Wales	Methidathion	950-37-8	0.006	Australia National standard
(Australia) State of New South Wales	Methiocarb	2032-65-7	0.007	Australia National standard
(Australia) State of New South Wales	Methomyl	16752-77-5	0.02	Australia National standard
(Australia) State of New South Wales	Methoxychlor	72-43-5	0.3	Australia National standard
(Australia) State of New South Wales	Methyl bromide	74-83-9	0.001	Australia National standard
(Australia) State of New South Wales	Metiram	9006-42-2	0.009	Australia National standard
(Australia) State of New South Wales	Metolaclor (Dual)	51218-45-2	0.3	Australia National standard
(Australia) State of New South Wales	Metribuzin	21087-64-9	0.07	Australia National standard
(Australia) State of New South Wales	Metsulfuron-methyl	74223-64-6	0.04	Australia National standard
(Australia) State of New South Wales	Mevinphos	7786-34-7	0.005	Australia National standard
(Australia) State of New South Wales	Molinate	2212-67-1	0.004	Australia National standard
(Australia) State of New South Wales	MONOCROTOPHOS	6923-22-4	0.002	Australia National standard
(Australia) State of New South Wales	Napropamide	15299-99-7	0.4	Australia National standard
(Australia) State of New South Wales	Nicarbazin	330-95-0	1	Australia National standard
(Australia) State of New South Wales	Nitralin	4726-14-1	0.5	Australia National standard
(Australia) State of New South Wales	Norflurazon	27314-13-2	0.05	Australia National standard
(Australia) State of New South Wales	Omethoate	1113-02-6	0.001	Australia National standard
(Australia) State of New South Wales	Oryzalin	19044-88-3	0.4	Australia National standard
(Australia) State of New South Wales	Oxamyl (Vydate)	23135-22-0	0.007	Australia National standard
(Australia) State of New South Wales	Paraquat	4685-14-7	0.02	Australia National standard
(Australia) State of New South Wales	Parathion	56-38-2	0.02	Australia National standard
(Australia) State of New South Wales	Parathion-methyl	298-00-0	0.0007	Australia National standard
(Australia) State of New South Wales	Pebulate	1114-71-2	0.03	Australia National standard
(Australia) State of New South Wales	Pendimethalin	40487-42-1	0.4	Australia National standard
(Australia) State of New South Wales	Pentachlorophenol	87-86-5	0.01	Australia National standard
(Australia) State of New South Wales	Permethrin	52645-53-1	0.2	Australia National standard
(Australia) State of New South Wales	picloram	1918-02-1	0.3	Australia National standard
(Australia) State of New South Wales	Piperonyl butoxide	51-03-6	0.6	Australia National standard
(Australia) State of New South Wales	Pirimikarb	23103-98-2	0.007	Australia National standard
(Australia) State of New South Wales	Pirimiphos, Methyl	29232-93-7	0.09	Australia National standard
(Australia) State of New South Wales	Pirimiphos-ethyl	23505-41-1	0.0005	Australia National standard
(Australia) State of New South Wales	Polihexanide	28757-47-3	0.7	Australia National standard
(Australia) State of New South Wales	Profenofos	41198-08-7	0.0003	Australia National standard
(Australia) State of New South Wales	Propachlor	1918-16-7	0.07	Australia National standard
(Australia) State of New South Wales	Propanil	709-98-8	0.7	Australia National standard
(Australia) State of New South Wales	Propargite	2312-35-8	0.007	Australia National standard
(Australia) State of New South Wales	Propazine	139-40-2	0.05	Australia National standard
(Australia) State of New South Wales	Propiconazole	60207-90-1	0.1	Australia National standard
(Australia) State of New South Wales	Propyzamide	23950-58-5	0.07	Australia National standard
(Australia) State of New South Wales	Pyrasulfotole	365400-11-9	0.04	Australia National standard
(Australia) State of New South Wales	Pyrazophos	13457-18-6	0.02	Australia National standard
(Australia) State of New South Wales	Pyroxsulam	422556-08-9	4	Australia National standard
(Australia) State of New South Wales	Quintozene	82-68-8	0.03	Australia National standard
(Australia) State of New South Wales	Simazine	122-34-9	0.02	Australia National standard
(Australia) State of New South Wales	Spirotetrama	203313-25-1	0.2	Australia National standard
(Australia) State of New South Wales	Sulprofos(Bolstar)	35400-43-2	0.01	Australia National standard
(Australia) State of New South Wales	2,4,5-T	93-76-5	0.1	Australia National standard
(Australia) State of New South Wales	Temephos	3383-96-8	0.4	Australia National standard
(Australia) State of New South Wales	Terbacil	5902-51-2	0.2	Australia National standard
(Australia) State of New South Wales	Terbufos	13071-79-9	0.0009	Australia National standard
(Australia) State of New South Wales	Terbutilazin	5915-41-3	0.01	Australia National standard
(Australia) State of New South Wales	Terbutryn	886-50-0	0.4	Australia National standard
(Australia) State of New South Wales	Tetrachlorvinphos	961-11-5	0.1	Australia National standard
(Australia) State of New South Wales	Thiobencarb	28249-77-6	0.04	Australia National standard
(Australia) State of New South Wales	Thiometon	640-15-3	0.004	Australia National standard
(Australia) State of New South Wales	Thiophanate	23564-06-9	0.005	Australia National standard
(Australia) State of New South Wales	Thiram	137-26-8	0.007	Australia National standard
(Australia) State of New South Wales	Toltrazuril	69004-03-1	0.004	Australia National standard
(Australia) State of New South Wales	Triadimefon	43121-43-3	0.09	Australia National standard
(Australia) State of New South Wales	Trichlorfon	52-68-6	0.007	Australia National standard
(Australia) State of New South Wales	Triclopyr	55335-06-3	0.02	Australia National standard
(Australia) State of New South Wales	Trifluralin	1582-09-8	0.09	Australia National standard
(Austrilia) State of Northern Australia	Acephate	30560-19-1	0.008	Australia National standard
(Austrilia) State of Northern Australia	Aldicarb	116-06-3	0.004	Australia National standard
(Austrilia) State of Northern Australia	Aldrin & Dieldrin		0.0003	Australia National standard
(Austrilia) State of Northern Australia	Aldrin	309-00-2	0.0003	Australia National standard
(Austrilia) State of Northern Australia	Dieldrin	60-57-1	0.0003	Australia National standard
(Austrilia) State of Northern Australia	Ametryn	834-12-8	0.07	Australia National standard
(Austrilia) State of Northern Australia	Amitraz	33089-61-1	0.009	Australia National standard
(Austrilia) State of Northern Australia	Amitrole	61-82-5	0.009	Australia National standard
(Austrilia) State of Northern Australia	Asulam	3337-71-1	0.07	Australia National standard
(Austrilia) State of Northern Australia	Atrazine	1912-24-9	0.02	Australia National standard
(Austrilia) State of Northern Australia	Azinphos-methyl	86-50-0	0.03	Australia National standard
(Austrilia) State of Northern Australia	Benomyl	17804-35-2	0.09	Australia National standard
(Austrilia) State of Northern Australia	Bentazon	25057-89-0	0.4	Australia National standard
(Austrilia) State of Northern Australia	Bioresmetrin	28434-01-7	0.1	Australia National standard
(Austrilia) State of Northern Australia	Bromacil	314-40-9	0.4	Australia National standard
(Austrilia) State of Northern Australia	BROMOPHOS-ETHYL	4824-78-6	0.01	Australia National standard
(Austrilia) State of Northern Australia	bromoxynil	1689-84-5	0.01	Australia National standard
(Austrilia) State of Northern Australia	Captan	133-06-2	0.4	Australia National standard
(Austrilia) State of Northern Australia	Carbaryl	63-25-2	0.03	Australia National standard
(Austrilia) State of Northern Australia	Carbendazim	10605-21-7	0.09	Australia National standard
(Austrilia) State of Northern Australia	Carfentrazone-ethyl	128639-02-1	0.1	Australia National standard
(Austrilia) State of Northern Australia	Carbofuran	1563-66-2	0.01	Australia National standard
(Austrilia) State of Northern Australia	Carbophenothion [or Trithion]	786-19-6	0.0005	Australia National standard
(Austrilia) State of Northern Australia	Carboxin	5234-68-4	0.3	Australia National standard
(Austrilia) State of Northern Australia	Chlorantraniliprole	500008-45-7	6	Australia National standard
(Austrilia) State of Northern Australia	Chlordane	12789-03-6	0.002	Australia National standard
(Austrilia) State of Northern Australia	Chlorfenvinphos	470-90-6	0.002	Australia National standard
(Austrilia) State of Northern Australia	Chlorothalonil	1897-45-6	0.05	Australia National standard
(Austrilia) State of Northern Australia	Chloroxuron	1982-47-4	0.01	Australia National standard
(Austrilia) State of Northern Australia	Chlorpyrifos	2921-88-2	0.01	Australia National standard
(Austrilia) State of Northern Australia	Chlorsulfuron	64902-72-3	0.2	Australia National standard
(Austrilia) State of Northern Australia	Clopyralid	1702-17-6	2	Australia National standard
(Austrilia) State of Northern Australia	Cyfluthrin	68359-37-5	0.05	Australia National standard
(Austrilia) State of Northern Australia	Cypermethrin	52315-07-8	0.2	Australia National standard
(Austrilia) State of Northern Australia	Cyprodinil	121552-61-2	0.09	Australia National standard
(Austrilia) State of Northern Australia	2,4-D	94-75-7	0.03	Australia National standard
(Austrilia) State of Northern Australia	DDT	50-29-3	0.009	Australia National standard
(Austrilia) State of Northern Australia	Deltametrin	52918-63-5	0.04	Australia National standard
(Austrilia) State of Northern Australia	Diazinon	333-41-5	0.04	Australia National standard
(Austrilia) State of Northern Australia	Dicamba	1918-00-9	0.1	Australia National standard
(Austrilia) State of Northern Australia	Dichlobenil	1194-65-6	0.01	Australia National standard
(Austrilia) State of Northern Australia	1,3-Dichloropropene	542-75-6	0.1	Australia National standard
(Austrilia) State of Northern Australia	Dichloroprop / Dichlorprop-P		0.1	Australia National standard
(Austrilia) State of Northern Australia	Dichlorprop	120-36-5	0.1	Australia National standard
(Austrilia) State of Northern Australia	Dichlorprop-P	15165-67-0	0.1	Australia National standard
(Austrilia) State of Northern Australia	Dichlorvos	62-73-7	0.005	Australia National standard
(Austrilia) State of Northern Australia	Dichlofop-methyl	51338-27-3	0.005	Australia National standard
(Austrilia) State of Northern Australia	Dicofol	115-32-2	0.004	Australia National standard
(Austrilia) State of Northern Australia	Difenzoquat (Avenge)	43222-48-6	0.1	Australia National standard
(Austrilia) State of Northern Australia	Diflubenzuron	35367-38-5	0.07	Australia National standard
(Austrilia) State of Northern Australia	Dimethoate	60-51-5	0.007	Australia National standard
(Austrilia) State of Northern Australia	Diphenamid	957-51-7	0.3	Australia National standard
(Austrilia) State of Northern Australia	Diquat	85-00-7	0.007	Australia National standard
(Austrilia) State of Northern Australia	Disulfoton	298-04-4	0.004	Australia National standard
(Austrilia) State of Northern Australia	Diuron	330-54-1	0.02	Australia National standard
(Austrilia) State of Northern Australia	2,2-DPA	75-99-0	0.5	Australia National standard
(Austrilia) State of Northern Australia	EDB	106-93-4	0.001	Australia National standard
(Austrilia) State of Northern Australia	Endosulfan	115-29-7	0.02	Australia National standard
(Austrilia) State of Northern Australia	Endothall	145-73-3	0.1	Australia National standard
(Austrilia) State of Northern Australia	Epichlorohydrin	106-89-8	0.0005	Australia National standard
(Austrilia) State of Northern Australia	EPTC	759-94-4	0.3	Australia National standard
(Austrilia) State of Northern Australia	Esfenvalerate	66230-04-4	0.03	Australia National standard
(Austrilia) State of Northern Australia	Ethion	563-12-2	0.004	Australia National standard
(Austrilia) State of Northern Australia	Ethoprophos	13194-48-4	0.001	Australia National standard
(Austrilia) State of Northern Australia	Etridiazole	2593-15-9	0.1	Australia National standard
(Austrilia) State of Northern Australia	Fenamiphos	22224-92-6	0.0005	Australia National standard
(Austrilia) State of Northern Australia	Fenarimol	60168-88-9	0.04	Australia National standard
(Austrilia) State of Northern Australia	Fenitrotion	122-14-5	0.007	Australia National standard
(Austrilia) State of Northern Australia	Fenoprop	93-72-1	0.01	Australia National standard
(Austrilia) State of Northern Australia	Fensulfothion	115-90-2	0.01	Australia National standard
(Austrilia) State of Northern Australia	Fenthion	55-38-9	0.007	Australia National standard
(Austrilia) State of Northern Australia	Fenvalerate	51630-58-1	0.06	Australia National standard
(Austrilia) State of Northern Australia	Fipronil	120068-37-3	0.0007	Australia National standard
(Austrilia) State of Northern Australia	Flamprop-methyl	52756-25-9	0.004	Australia National standard
(Austrilia) State of Northern Australia	Fluometuron	2164-17-2	0.07	Australia National standard
(Austrilia) State of Northern Australia	Fluproponate	22898-01-7	0.009	Australia National standard
(Austrilia) State of Northern Australia	Formothion	2540-82-1	0.05	Australia National standard
(Austrilia) State of Northern Australia	Fosamine	59682-52-9	0.03	Australia National standard
(Austrilia) State of Northern Australia	Glyphosate	1071-83-6	1	Australia National standard
(Austrilia) State of Northern Australia	Haloxyfop	69806-34-4	0.001	Australia National standard
(Austrilia) State of Northern Australia	Heptachlor	76-44-8	0.0003	Australia National standard
(Austrilia) State of Northern Australia	Hexazinone	51235-04-2	0.4	Australia National standard
(Austrilia) State of Northern Australia	Imazapyr	81334-34-1	9	Australia National standard
(Austrilia) State of Northern Australia	Iprodione	36734-19-7	0.1	Australia National standard
(Austrilia) State of Northern Australia	Lindane	58-89-9	0.01	Australia National standard
(Austrilia) State of Northern Australia	Malathion	121-75-5	0.07	Australia National standard
(Austrilia) State of Northern Australia	Mancozeb	8018-01-7	0.009	Australia National standard
(Austrilia) State of Northern Australia	MCPA	94-74-6	0.04	Australia National standard
(Austrilia) State of Northern Australia	Metaldehyde	108-62-3	0.02	Australia National standard
(Austrilia) State of Northern Australia	methylisothiocyanate	556-61-6	0.001	Australia National standard
(Austrilia) State of Northern Australia	Methidathion	950-37-8	0.006	Australia National standard
(Austrilia) State of Northern Australia	Methiocarb	2032-65-7	0.007	Australia National standard
(Austrilia) State of Northern Australia	Methomyl	16752-77-5	0.02	Australia National standard
(Austrilia) State of Northern Australia	Methoxychlor	72-43-5	0.3	Australia National standard
(Austrilia) State of Northern Australia	Methyl bromide	74-83-9	0.001	Australia National standard
(Austrilia) State of Northern Australia	Metiram	9006-42-2	0.009	Australia National standard
(Austrilia) State of Northern Australia	Metolaclor (Dual)	51218-45-2	0.3	Australia National standard
(Austrilia) State of Northern Australia	Metribuzin	21087-64-9	0.07	Australia National standard
(Austrilia) State of Northern Australia	Metsulfuron-methyl	74223-64-6	0.04	Australia National standard
(Austrilia) State of Northern Australia	Mevinphos	7786-34-7	0.005	Australia National standard
(Austrilia) State of Northern Australia	Molinate	2212-67-1	0.004	Australia National standard
(Austrilia) State of Northern Australia	MONOCROTOPHOS	6923-22-4	0.002	Australia National standard
(Austrilia) State of Northern Australia	Napropamide	15299-99-7	0.4	Australia National standard
(Austrilia) State of Northern Australia	Nicarbazin	330-95-0	1	Australia National standard
(Austrilia) State of Northern Australia	Nitralin	4726-14-1	0.5	Australia National standard
(Austrilia) State of Northern Australia	Norflurazon	27314-13-2	0.05	Australia National standard
(Austrilia) State of Northern Australia	Omethoate	1113-02-6	0.001	Australia National standard
(Austrilia) State of Northern Australia	Oryzalin	19044-88-3	0.4	Australia National standard
(Austrilia) State of Northern Australia	Oxamyl (Vydate)	23135-22-0	0.007	Australia National standard
(Austrilia) State of Northern Australia	Paraquat	4685-14-7	0.02	Australia National standard
(Austrilia) State of Northern Australia	Parathion	56-38-2	0.02	Australia National standard
(Austrilia) State of Northern Australia	Parathion-methyl	298-00-0	0.0007	Australia National standard
(Austrilia) State of Northern Australia	Pebulate	1114-71-2	0.03	Australia National standard
(Austrilia) State of Northern Australia	Pendimethalin	40487-42-1	0.4	Australia National standard
(Austrilia) State of Northern Australia	Pentachlorophenol	87-86-5	0.01	Australia National standard
(Austrilia) State of Northern Australia	Permethrin	52645-53-1	0.2	Australia National standard
(Austrilia) State of Northern Australia	picloram	1918-02-1	0.3	Australia National standard
(Austrilia) State of Northern Australia	Piperonyl butoxide	51-03-6	0.6	Australia National standard
(Austrilia) State of Northern Australia	Pirimikarb	23103-98-2	0.007	Australia National standard
(Austrilia) State of Northern Australia	Pirimiphos, Methyl	29232-93-7	0.09	Australia National standard
(Austrilia) State of Northern Australia	Pirimiphos-ethyl	23505-41-1	0.0005	Australia National standard
(Austrilia) State of Northern Australia	Polihexanide	28757-47-3	0.7	Australia National standard
(Austrilia) State of Northern Australia	Profenofos	41198-08-7	0.0003	Australia National standard
(Austrilia) State of Northern Australia	Propachlor	1918-16-7	0.07	Australia National standard
(Austrilia) State of Northern Australia	Propanil	709-98-8	0.7	Australia National standard
(Austrilia) State of Northern Australia	Propargite	2312-35-8	0.007	Australia National standard
(Austrilia) State of Northern Australia	Propazine	139-40-2	0.05	Australia National standard
(Austrilia) State of Northern Australia	Propiconazole	60207-90-1	0.1	Australia National standard
(Austrilia) State of Northern Australia	Propyzamide	23950-58-5	0.07	Australia National standard
(Austrilia) State of Northern Australia	Pyrasulfotole	365400-11-9	0.04	Australia National standard
(Austrilia) State of Northern Australia	Pyrazophos	13457-18-6	0.02	Australia National standard
(Austrilia) State of Northern Australia	Pyroxsulam	422556-08-9	4	Australia National standard
(Austrilia) State of Northern Australia	Quintozene	82-68-8	0.03	Australia National standard
(Austrilia) State of Northern Australia	Simazine	122-34-9	0.02	Australia National standard
(Austrilia) State of Northern Australia	Spirotetrama	203313-25-1	0.2	Australia National standard
(Austrilia) State of Northern Australia	Sulprofos(Bolstar)	35400-43-2	0.01	Australia National standard
(Austrilia) State of Northern Australia	2,4,5-T	93-76-5	0.1	Australia National standard
(Austrilia) State of Northern Australia	Temephos	3383-96-8	0.4	Australia National standard
(Austrilia) State of Northern Australia	Terbacil	5902-51-2	0.2	Australia National standard
(Austrilia) State of Northern Australia	Terbufos	13071-79-9	0.0009	Australia National standard
(Austrilia) State of Northern Australia	Terbutilazin	5915-41-3	0.01	Australia National standard
(Austrilia) State of Northern Australia	Terbutryn	886-50-0	0.4	Australia National standard
(Austrilia) State of Northern Australia	Tetrachlorvinphos	961-11-5	0.1	Australia National standard
(Austrilia) State of Northern Australia	Thiobencarb	28249-77-6	0.04	Australia National standard
(Austrilia) State of Northern Australia	Thiometon	640-15-3	0.004	Australia National standard
(Austrilia) State of Northern Australia	Thiophanate	23564-06-9	0.005	Australia National standard
(Austrilia) State of Northern Australia	Thiram	137-26-8	0.007	Australia National standard
(Austrilia) State of Northern Australia	Toltrazuril	69004-03-1	0.004	Australia National standard
(Austrilia) State of Northern Australia	Triadimefon	43121-43-3	0.09	Australia National standard
(Austrilia) State of Northern Australia	Trichlorfon	52-68-6	0.007	Australia National standard
(Austrilia) State of Northern Australia	Triclopyr	55335-06-3	0.02	Australia National standard
(Austrilia) State of Northern Australia	Trifluralin	1582-09-8	0.09	Australia National standard
(Austrilia) State of Queensland	Acephate	30560-19-1	0.01	Queensland
(Austrilia) State of Queensland	Alachlor	15972-60-8	0.002	Queensland
(Austrilia) State of Queensland	Aldicarb	116-06-3	0.001	Queensland
(Austrilia) State of Queensland	Aldicarb Sulfone	1646-88-4	0.007	Queensland
(Austrilia) State of Queensland	Aldicarb Sulfoxide	1646-87-3	0.007	Queensland
(Austrilia) State of Queensland	Aldrin	309-00-2	0.0003	Queensland
(Austrilia) State of Queensland	Alprazolam	28981-97-7	0.00025	Queensland
(Austrilia) State of Queensland	Ametryn	834-12-8	0.05	Queensland
(Austrilia) State of Queensland	Amitrole	61-82-5	0.01	Queensland
(Austrilia) State of Queensland	Amoxycillin	26787-78-0	0.0015	Queensland
(Austrilia) State of Queensland	Asulam	3337-71-1	0.05	Queensland
(Austrilia) State of Queensland	Atrazine	1912-24-9	0.04	Queensland
(Austrilia) State of Queensland	Azinphos-methyl	86-50-0	0.003	Queensland
(Austrilia) State of Queensland	Benomyl	17804-35-2	0.1	Queensland
(Austrilia) State of Queensland	Bentazon	25057-89-0	0.03	Queensland
(Austrilia) State of Queensland	Bioresmetrin	28434-01-7	0.1	Queensland
(Austrilia) State of Queensland	Bisphenol A	80-05-7	0.2	Queensland
(Austrilia) State of Queensland	Bromacil	314-40-9	0.3	Queensland
(Austrilia) State of Queensland	BROMOPHOS-ETHYL	4824-78-6	0.01	Queensland
(Austrilia) State of Queensland	bromoxynil	1689-84-5	0.03	Queensland
(Austrilia) State of Queensland	Carbaryl	63-25-2	0.03	Queensland
(Austrilia) State of Queensland	Carbendazim	10605-21-7	0.1	Queensland
(Austrilia) State of Queensland	Carbofuran	1563-66-2	0.01	Queensland
(Austrilia) State of Queensland	Carbophenothion [or Trithion]	786-19-6	0.0005	Queensland
(Austrilia) State of Queensland	Carboxin	5234-68-4	0.3	Queensland
(Austrilia) State of Queensland	Chlordane	12789-03-6	0.001	Queensland
(Austrilia) State of Queensland	Chlorfenvinphos	470-90-6	0.005	Queensland
(Austrilia) State of Queensland	Chlorothalonil	1897-45-6	0.03	Queensland
(Austrilia) State of Queensland	Chloroxuron	1982-47-4	0.01	Queensland
(Austrilia) State of Queensland	Chlorpyrifos	2921-88-2	0.01	Queensland
(Austrilia) State of Queensland	Chlorpyrifos-methyl	5598-13-0	0.01	Queensland
(Austrilia) State of Queensland	Chlorpyrifos oxon	5598-15-2	0.01	Queensland
(Austrilia) State of Queensland	Chlorsulfuron	64902-72-3	0.1	Queensland
(Austrilia) State of Queensland	Clopyralid	1702-17-6	1	Queensland
(Austrilia) State of Queensland	Cyanogen Chloride	506-77-4	0.08	Queensland
(Austrilia) State of Queensland	Cypermethrin	52315-07-8	0.0005	Queensland
(Austrilia) State of Queensland	2,4-D	94-75-7	0.03	Queensland
(Austrilia) State of Queensland	2,4-DP	120-36-5	0.1	Queensland
(Austrilia) State of Queensland	DDE	72-55-9	0.02	Queensland
(Austrilia) State of Queensland	DDT	50-29-3	0.02	Queensland
(Austrilia) State of Queensland	Demeton-S	919-86-8	0.00015	Queensland
(Austrilia) State of Queensland	Diazinon	333-41-5	0.003	Queensland
(Austrilia) State of Queensland	Dicamba	1918-00-9	0.1	Queensland
(Austrilia) State of Queensland	Dichlobenil	1194-65-6	0.01	Queensland
(Austrilia) State of Queensland	Dichlorvos	62-73-7	0.001	Queensland
(Austrilia) State of Queensland	Dichlofop-methyl	51338-27-3	0.005	Queensland
(Austrilia) State of Queensland	Dicofol	115-32-2	0.003	Queensland
(Austrilia) State of Queensland	Dieldrin	60-57-1	0.0003	Queensland
(Austrilia) State of Queensland	Difenzoquat (Avenge)	43222-48-6	0.1	Queensland
(Austrilia) State of Queensland	Dimethoate	60-51-5	0.05	Queensland
(Austrilia) State of Queensland	Diphenamid	957-51-7	0.3	Queensland
(Austrilia) State of Queensland	Diquat	85-00-7	0.005	Queensland
(Austrilia) State of Queensland	Disulfoton	298-04-4	0.003	Queensland
(Austrilia) State of Queensland	Diuron	330-54-1	0.03	Queensland
(Austrilia) State of Queensland	Endosulfan	115-29-7	0.03	Queensland
(Austrilia) State of Queensland	Endothall	145-73-3	0.1	Queensland
(Austrilia) State of Queensland	Epichlorohydrin	106-89-8	0.0005	Queensland
(Austrilia) State of Queensland	Ethion	563-12-2	0.003	Queensland
(Austrilia) State of Queensland	Ethoprophos	13194-48-4	0.001	Queensland
(Austrilia) State of Queensland	EDB	106-93-4	0.001	Queensland
(Austrilia) State of Queensland	Etridiazole	2593-15-9	0.1	Queensland
(Austrilia) State of Queensland	Fenamiphos	22224-92-6	0.0003	Queensland
(Austrilia) State of Queensland	Fenarimol	60168-88-9	0.03	Queensland
(Austrilia) State of Queensland	Fenitrotion	122-14-5	0.01	Queensland
(Austrilia) State of Queensland	Fenoprop	93-72-1	0.01	Queensland
(Austrilia) State of Queensland	Fensulfothion	115-90-2	0.01	Queensland
(Austrilia) State of Queensland	Fenthion	55-38-9	0.0005	Queensland
(Austrilia) State of Queensland	Fenvalerate	51630-58-1	0.05	Queensland
(Austrilia) State of Queensland	Flamprop-methyl	52756-25-9	0.003	Queensland
(Austrilia) State of Queensland	Fluometuron	2164-17-2	0.05	Queensland
(Austrilia) State of Queensland	fluroxypyr	69377-81-7	0.7	Queensland
(Austrilia) State of Queensland	Formothion	2540-82-1	0.05	Queensland
(Austrilia) State of Queensland	Fosamine	59682-52-9	0.03	Queensland
(Austrilia) State of Queensland	Glyphosate	1071-83-6	1	Queensland
(Austrilia) State of Queensland	Haloxyfop	69806-34-4	0.00105	Queensland
(Austrilia) State of Queensland	Haloxyfop-methyl	69806-40-2	0.000175	Queensland
(Austrilia) State of Queensland	Heptachlor and heptachlor epoxide		0.0003	Queensland
(Austrilia) State of Queensland	Heptachlor	76-44-8	0.0003	Queensland
(Austrilia) State of Queensland	Heptachlor epoxide	1024-57-3	0.0003	Queensland
(Austrilia) State of Queensland	Hexazinone	51235-04-2	0.3	Queensland
(Austrilia) State of Queensland	Iodine	7553-56-2	0.06	Queensland
(Austrilia) State of Queensland	Lindane (alpha BHC, beta BHC)		0.02	Queensland
(Austrilia) State of Queensland	alpha - BHC	319-84-6	0.02	Queensland
(Austrilia) State of Queensland	beta - BHC	319-85-7	0.02	Queensland
(Austrilia) State of Queensland	Lindane	58-89-9	0.02	Queensland
(Austrilia) State of Queensland	Malathion	121-75-5	0.9	Queensland
(Austrilia) State of Queensland	MCPP	93-65-2	0.01	Queensland
(Austrilia) State of Queensland	Methidathion	950-37-8	0.03	Queensland
(Austrilia) State of Queensland	Methiocarb	2032-65-7	0.005	Queensland
(Austrilia) State of Queensland	Methomyl	16752-77-5	0.03	Queensland
(Austrilia) State of Queensland	Methoxychlor	72-43-5	0.3	Queensland
(Austrilia) State of Queensland	Metolaclor (Dual)	51218-45-2	0.3	Queensland
(Austrilia) State of Queensland	Metribuzin	21087-64-9	0.05	Queensland
(Austrilia) State of Queensland	Metsulfuron-methyl	74223-64-6	0.03	Queensland
(Austrilia) State of Queensland	Mevinphos	7786-34-7	0.005	Queensland
(Austrilia) State of Queensland	Molinate	2212-67-1	0.005	Queensland
(Austrilia) State of Queensland	MONOCROTOPHOS	6923-22-4	0.001	Queensland
(Austrilia) State of Queensland	Napropamide	15299-99-7	1	Queensland
(Austrilia) State of Queensland	Nitralin	4726-14-1	0.5	Queensland
(Austrilia) State of Queensland	Norflurazon	27314-13-2	0.05	Queensland
(Austrilia) State of Queensland	Oryzalin	19044-88-3	0.3	Queensland
(Austrilia) State of Queensland	Oxamyl (Vydate)	23135-22-0	0.1	Queensland
(Austrilia) State of Queensland	Paraquat	4685-14-7	0.03	Queensland
(Austrilia) State of Queensland	Parathion	56-38-2	0.01	Queensland
(Austrilia) State of Queensland	Parathion-methyl	298-00-0	0.1	Queensland
(Austrilia) State of Queensland	Pebulate	1114-71-2	0.03	Queensland
(Austrilia) State of Queensland	Pendimethalin	40487-42-1	0.3	Queensland
(Austrilia) State of Queensland	Pentachlorophenol	87-86-5	0.01	Queensland
(Austrilia) State of Queensland	Permethrin	52645-53-1	0.1	Queensland
(Austrilia) State of Queensland	Phenol	108-95-2	0.15	Queensland
(Austrilia) State of Queensland	picloram	1918-02-1	0.3	Queensland
(Austrilia) State of Queensland	Piperonyl butoxide	51-03-6	0.1	Queensland
(Austrilia) State of Queensland	Pirimikarb	23103-98-2	0.005	Queensland
(Austrilia) State of Queensland	Pirimiphos, Methyl	29232-93-7	0.05	Queensland
(Austrilia) State of Queensland	Pirimiphos-ethyl	23505-41-1	0.0005	Queensland
(Austrilia) State of Queensland	Profenofos	41198-08-7	0.0003	Queensland
(Austrilia) State of Queensland	Promecarb	2631-37-0	0.03	Queensland
(Austrilia) State of Queensland	Prometryn	7287-19-6	0.105	Queensland
(Austrilia) State of Queensland	Propachlor	1918-16-7	0.05	Queensland
(Austrilia) State of Queensland	Propanil	709-98-8	0.5	Queensland
(Austrilia) State of Queensland	Propargite	2312-35-8	0.05	Queensland
(Austrilia) State of Queensland	Propazine	139-40-2	0.05	Queensland
(Austrilia) State of Queensland	Propiconazole	60207-90-1	0.1	Queensland
(Austrilia) State of Queensland	Propoxur	114-26-1	0.07	Queensland
(Austrilia) State of Queensland	Propyzamide	23950-58-5	0.3	Queensland
(Austrilia) State of Queensland	Pyrazophos	13457-18-6	0.03	Queensland
(Austrilia) State of Queensland	Quintozene	82-68-8	0.03	Queensland
(Austrilia) State of Queensland	Simazine	122-34-9	0.02	Queensland
(Austrilia) State of Queensland	Sulprofos(Bolstar)	35400-43-2	0.01	Queensland
(Austrilia) State of Queensland	Temephos	3383-96-8	0.3	Queensland
(Austrilia) State of Queensland	Terbacil	5902-51-2	0.03	Queensland
(Austrilia) State of Queensland	Terbufos	13071-79-9	0.0005	Queensland
(Austrilia) State of Queensland	Terbutryn	886-50-0	0.3	Queensland
(Austrilia) State of Queensland	Tetrachlorvinphos	961-11-5	0.1	Queensland
(Austrilia) State of Queensland	Thiobencarb	28249-77-6	0.03	Queensland
(Austrilia) State of Queensland	Thiometon	640-15-3	0.003	Queensland
(Austrilia) State of Queensland	Thiophanate	23564-06-9	0.005	Queensland
(Austrilia) State of Queensland	Thiram	137-26-8	0.003	Queensland
(Austrilia) State of Queensland	Triadimefon	43121-43-3	0.002	Queensland
(Austrilia) State of Queensland	Trichlorfon	52-68-6	0.005	Queensland
(Austrilia) State of Queensland	2,4,5-T	93-76-5	0.1	Queensland
(Austrilia) State of Queensland	Triclopyr	55335-06-3	0.01	Queensland
(Austrilia) State of Queensland	Trifluralin	1582-09-8	0.05	Queensland
(Austrilia) State of Queensland	Vernolate	1929-77-7	0.03	Queensland
(Austrilia) State of Queensland	Warfarin	81-81-2	0.0015	Queensland
(Austrilia) State of Queensland	Acephate	30560-19-1	0.008	Australia National standard
(Austrilia) State of Queensland	Aldicarb	116-06-3	0.004	Australia National standard
(Austrilia) State of Queensland	Aldrin & Dieldrin		0.0003	Australia National standard
(Austrilia) State of Queensland	Aldrin	309-00-2	0.0003	Australia National standard
(Austrilia) State of Queensland	Dieldrin	60-57-1	0.0003	Australia National standard
(Austrilia) State of Queensland	Ametryn	834-12-8	0.07	Australia National standard
(Austrilia) State of Queensland	Amitraz	33089-61-1	0.009	Australia National standard
(Austrilia) State of Queensland	Amitrole	61-82-5	0.009	Australia National standard
(Austrilia) State of Queensland	Asulam	3337-71-1	0.07	Australia National standard
(Austrilia) State of Queensland	Atrazine	1912-24-9	0.02	Australia National standard
(Austrilia) State of Queensland	Azinphos-methyl	86-50-0	0.03	Australia National standard
(Austrilia) State of Queensland	Benomyl	17804-35-2	0.09	Australia National standard
(Austrilia) State of Queensland	Bentazon	25057-89-0	0.4	Australia National standard
(Austrilia) State of Queensland	Bioresmetrin	28434-01-7	0.1	Australia National standard
(Austrilia) State of Queensland	Bromacil	314-40-9	0.4	Australia National standard
(Austrilia) State of Queensland	BROMOPHOS-ETHYL	4824-78-6	0.01	Australia National standard
(Austrilia) State of Queensland	bromoxynil	1689-84-5	0.01	Australia National standard
(Austrilia) State of Queensland	Captan	133-06-2	0.4	Australia National standard
(Austrilia) State of Queensland	Carbaryl	63-25-2	0.03	Australia National standard
(Austrilia) State of Queensland	Carbendazim	10605-21-7	0.09	Australia National standard
(Austrilia) State of Queensland	Carfentrazone-ethyl	128639-02-1	0.1	Australia National standard
(Austrilia) State of Queensland	Carbofuran	1563-66-2	0.01	Australia National standard
(Austrilia) State of Queensland	Carbophenothion [or Trithion]	786-19-6	0.0005	Australia National standard
(Austrilia) State of Queensland	Carboxin	5234-68-4	0.3	Australia National standard
(Austrilia) State of Queensland	Chlorantraniliprole	500008-45-7	6	Australia National standard
(Austrilia) State of Queensland	Chlordane	12789-03-6	0.002	Australia National standard
(Austrilia) State of Queensland	Chlorfenvinphos	470-90-6	0.002	Australia National standard
(Austrilia) State of Queensland	Chlorothalonil	1897-45-6	0.05	Australia National standard
(Austrilia) State of Queensland	Chloroxuron	1982-47-4	0.01	Australia National standard
(Austrilia) State of Queensland	Chlorpyrifos	2921-88-2	0.01	Australia National standard
(Austrilia) State of Queensland	Chlorsulfuron	64902-72-3	0.2	Australia National standard
(Austrilia) State of Queensland	Clopyralid	1702-17-6	2	Australia National standard
(Austrilia) State of Queensland	Cyfluthrin	68359-37-5	0.05	Australia National standard
(Austrilia) State of Queensland	Cypermethrin	52315-07-8	0.2	Australia National standard
(Austrilia) State of Queensland	Cyprodinil	121552-61-2	0.09	Australia National standard
(Austrilia) State of Queensland	2,4-D	94-75-7	0.03	Australia National standard
(Austrilia) State of Queensland	DDT	50-29-3	0.009	Australia National standard
(Austrilia) State of Queensland	Deltametrin	52918-63-5	0.04	Australia National standard
(Austrilia) State of Queensland	Diazinon	333-41-5	0.04	Australia National standard
(Austrilia) State of Queensland	Dicamba	1918-00-9	0.1	Australia National standard
(Austrilia) State of Queensland	Dichlobenil	1194-65-6	0.01	Australia National standard
(Austrilia) State of Queensland	1,3-Dichloropropene	542-75-6	0.1	Australia National standard
(Austrilia) State of Queensland	Dichloroprop / Dichlorprop-P		0.1	Australia National standard
(Austrilia) State of Queensland	Dichlorprop	120-36-5	0.1	Australia National standard
(Austrilia) State of Queensland	Dichlorprop-P	15165-67-0	0.1	Australia National standard
(Austrilia) State of Queensland	Dichlorvos	62-73-7	0.005	Australia National standard
(Austrilia) State of Queensland	Dichlofop-methyl	51338-27-3	0.005	Australia National standard
(Austrilia) State of Queensland	Dicofol	115-32-2	0.004	Australia National standard
(Austrilia) State of Queensland	Difenzoquat (Avenge)	43222-48-6	0.1	Australia National standard
(Austrilia) State of Queensland	Diflubenzuron	35367-38-5	0.07	Australia National standard
(Austrilia) State of Queensland	Dimethoate	60-51-5	0.007	Australia National standard
(Austrilia) State of Queensland	Diphenamid	957-51-7	0.3	Australia National standard
(Austrilia) State of Queensland	Diquat	85-00-7	0.007	Australia National standard
(Austrilia) State of Queensland	Disulfoton	298-04-4	0.004	Australia National standard
(Austrilia) State of Queensland	Diuron	330-54-1	0.02	Australia National standard
(Austrilia) State of Queensland	2,2-DPA	75-99-0	0.5	Australia National standard
(Austrilia) State of Queensland	EDB	106-93-4	0.001	Australia National standard
(Austrilia) State of Queensland	Endosulfan	115-29-7	0.02	Australia National standard
(Austrilia) State of Queensland	Endothall	145-73-3	0.1	Australia National standard
(Austrilia) State of Queensland	Epichlorohydrin	106-89-8	0.0005	Australia National standard
(Austrilia) State of Queensland	EPTC	759-94-4	0.3	Australia National standard
(Austrilia) State of Queensland	Esfenvalerate	66230-04-4	0.03	Australia National standard
(Austrilia) State of Queensland	Ethion	563-12-2	0.004	Australia National standard
(Austrilia) State of Queensland	Ethoprophos	13194-48-4	0.001	Australia National standard
(Austrilia) State of Queensland	Etridiazole	2593-15-9	0.1	Australia National standard
(Austrilia) State of Queensland	Fenamiphos	22224-92-6	0.0005	Australia National standard
(Austrilia) State of Queensland	Fenarimol	60168-88-9	0.04	Australia National standard
(Austrilia) State of Queensland	Fenitrotion	122-14-5	0.007	Australia National standard
(Austrilia) State of Queensland	Fenoprop	93-72-1	0.01	Australia National standard
(Austrilia) State of Queensland	Fensulfothion	115-90-2	0.01	Australia National standard
(Austrilia) State of Queensland	Fenthion	55-38-9	0.007	Australia National standard
(Austrilia) State of Queensland	Fenvalerate	51630-58-1	0.06	Australia National standard
(Austrilia) State of Queensland	Fipronil	120068-37-3	0.0007	Australia National standard
(Austrilia) State of Queensland	Flamprop-methyl	52756-25-9	0.004	Australia National standard
(Austrilia) State of Queensland	Fluometuron	2164-17-2	0.07	Australia National standard
(Austrilia) State of Queensland	Fluproponate	22898-01-7	0.009	Australia National standard
(Austrilia) State of Queensland	Formothion	2540-82-1	0.05	Australia National standard
(Austrilia) State of Queensland	Fosamine	59682-52-9	0.03	Australia National standard
(Austrilia) State of Queensland	Glyphosate	1071-83-6	1	Australia National standard
(Austrilia) State of Queensland	Haloxyfop	69806-34-4	0.001	Australia National standard
(Austrilia) State of Queensland	Heptachlor	76-44-8	0.0003	Australia National standard
(Austrilia) State of Queensland	Hexazinone	51235-04-2	0.4	Australia National standard
(Austrilia) State of Queensland	Imazapyr	81334-34-1	9	Australia National standard
(Austrilia) State of Queensland	Iprodione	36734-19-7	0.1	Australia National standard
(Austrilia) State of Queensland	Lindane	58-89-9	0.01	Australia National standard
(Austrilia) State of Queensland	Malathion	121-75-5	0.07	Australia National standard
(Austrilia) State of Queensland	Mancozeb	8018-01-7	0.009	Australia National standard
(Austrilia) State of Queensland	MCPA	94-74-6	0.04	Australia National standard
(Austrilia) State of Queensland	Metaldehyde	108-62-3	0.02	Australia National standard
(Austrilia) State of Queensland	methylisothiocyanate	556-61-6	0.001	Australia National standard
(Austrilia) State of Queensland	Methidathion	950-37-8	0.006	Australia National standard
(Austrilia) State of Queensland	Methiocarb	2032-65-7	0.007	Australia National standard
(Austrilia) State of Queensland	Methomyl	16752-77-5	0.02	Australia National standard
(Austrilia) State of Queensland	Methoxychlor	72-43-5	0.3	Australia National standard
(Austrilia) State of Queensland	Methyl bromide	74-83-9	0.001	Australia National standard
(Austrilia) State of Queensland	Metiram	9006-42-2	0.009	Australia National standard
(Austrilia) State of Queensland	Metolaclor (Dual)	51218-45-2	0.3	Australia National standard
(Austrilia) State of Queensland	Metribuzin	21087-64-9	0.07	Australia National standard
(Austrilia) State of Queensland	Metsulfuron-methyl	74223-64-6	0.04	Australia National standard
(Austrilia) State of Queensland	Mevinphos	7786-34-7	0.005	Australia National standard
(Austrilia) State of Queensland	Molinate	2212-67-1	0.004	Australia National standard
(Austrilia) State of Queensland	MONOCROTOPHOS	6923-22-4	0.002	Australia National standard
(Austrilia) State of Queensland	Napropamide	15299-99-7	0.4	Australia National standard
(Austrilia) State of Queensland	Nicarbazin	330-95-0	1	Australia National standard
(Austrilia) State of Queensland	Nitralin	4726-14-1	0.5	Australia National standard
(Austrilia) State of Queensland	Norflurazon	27314-13-2	0.05	Australia National standard
(Austrilia) State of Queensland	Omethoate	1113-02-6	0.001	Australia National standard
(Austrilia) State of Queensland	Oryzalin	19044-88-3	0.4	Australia National standard
(Austrilia) State of Queensland	Oxamyl (Vydate)	23135-22-0	0.007	Australia National standard
(Austrilia) State of Queensland	Paraquat	4685-14-7	0.02	Australia National standard
(Austrilia) State of Queensland	Parathion	56-38-2	0.02	Australia National standard
(Austrilia) State of Queensland	Parathion-methyl	298-00-0	0.0007	Australia National standard
(Austrilia) State of Queensland	Pebulate	1114-71-2	0.03	Australia National standard
(Austrilia) State of Queensland	Pendimethalin	40487-42-1	0.4	Australia National standard
(Austrilia) State of Queensland	Pentachlorophenol	87-86-5	0.01	Australia National standard
(Austrilia) State of Queensland	Permethrin	52645-53-1	0.2	Australia National standard
(Austrilia) State of Queensland	picloram	1918-02-1	0.3	Australia National standard
(Austrilia) State of Queensland	Piperonyl butoxide	51-03-6	0.6	Australia National standard
(Austrilia) State of Queensland	Pirimikarb	23103-98-2	0.007	Australia National standard
(Austrilia) State of Queensland	Pirimiphos, Methyl	29232-93-7	0.09	Australia National standard
(Austrilia) State of Queensland	Pirimiphos-ethyl	23505-41-1	0.0005	Australia National standard
(Austrilia) State of Queensland	Polihexanide	28757-47-3	0.7	Australia National standard
(Austrilia) State of Queensland	Profenofos	41198-08-7	0.0003	Australia National standard
(Austrilia) State of Queensland	Propachlor	1918-16-7	0.07	Australia National standard
(Austrilia) State of Queensland	Propanil	709-98-8	0.7	Australia National standard
(Austrilia) State of Queensland	Propargite	2312-35-8	0.007	Australia National standard
(Austrilia) State of Queensland	Propazine	139-40-2	0.05	Australia National standard
(Austrilia) State of Queensland	Propiconazole	60207-90-1	0.1	Australia National standard
(Austrilia) State of Queensland	Propyzamide	23950-58-5	0.07	Australia National standard
(Austrilia) State of Queensland	Pyrasulfotole	365400-11-9	0.04	Australia National standard
(Austrilia) State of Queensland	Pyrazophos	13457-18-6	0.02	Australia National standard
(Austrilia) State of Queensland	Pyroxsulam	422556-08-9	4	Australia National standard
(Austrilia) State of Queensland	Quintozene	82-68-8	0.03	Australia National standard
(Austrilia) State of Queensland	Simazine	122-34-9	0.02	Australia National standard
(Austrilia) State of Queensland	Spirotetrama	203313-25-1	0.2	Australia National standard
(Austrilia) State of Queensland	Sulprofos(Bolstar)	35400-43-2	0.01	Australia National standard
(Austrilia) State of Queensland	2,4,5-T	93-76-5	0.1	Australia National standard
(Austrilia) State of Queensland	Temephos	3383-96-8	0.4	Australia National standard
(Austrilia) State of Queensland	Terbacil	5902-51-2	0.2	Australia National standard
(Austrilia) State of Queensland	Terbufos	13071-79-9	0.0009	Australia National standard
(Austrilia) State of Queensland	Terbutilazin	5915-41-3	0.01	Australia National standard
(Austrilia) State of Queensland	Terbutryn	886-50-0	0.4	Australia National standard
(Austrilia) State of Queensland	Tetrachlorvinphos	961-11-5	0.1	Australia National standard
(Austrilia) State of Queensland	Thiobencarb	28249-77-6	0.04	Australia National standard
(Austrilia) State of Queensland	Thiometon	640-15-3	0.004	Australia National standard
(Austrilia) State of Queensland	Thiophanate	23564-06-9	0.005	Australia National standard
(Austrilia) State of Queensland	Thiram	137-26-8	0.007	Australia National standard
(Austrilia) State of Queensland	Toltrazuril	69004-03-1	0.004	Australia National standard
(Austrilia) State of Queensland	Triadimefon	43121-43-3	0.09	Australia National standard
(Austrilia) State of Queensland	Trichlorfon	52-68-6	0.007	Australia National standard
(Austrilia) State of Queensland	Triclopyr	55335-06-3	0.02	Australia National standard
(Austrilia) State of Queensland	Trifluralin	1582-09-8	0.09	Australia National standard
(Austrilia) State of Western Australia	Acephate	30560-19-1	0.008	Australia National standard
(Austrilia) State of Western Australia	Aldicarb	116-06-3	0.004	Australia National standard
(Austrilia) State of Western Australia	Aldrin & Dieldrin		0.0003	Australia National standard
(Austrilia) State of Western Australia	Aldrin	309-00-2	0.0003	Australia National standard
(Austrilia) State of Western Australia	Dieldrin	60-57-1	0.0003	Australia National standard
(Austrilia) State of Western Australia	Ametryn	834-12-8	0.07	Australia National standard
(Austrilia) State of Western Australia	Amitraz	33089-61-1	0.009	Australia National standard
(Austrilia) State of Western Australia	Amitrole	61-82-5	0.009	Australia National standard
(Austrilia) State of Western Australia	Asulam	3337-71-1	0.07	Australia National standard
(Austrilia) State of Western Australia	Atrazine	1912-24-9	0.02	Australia National standard
(Austrilia) State of Western Australia	Azinphos-methyl	86-50-0	0.03	Australia National standard
(Austrilia) State of Western Australia	Benomyl	17804-35-2	0.09	Australia National standard
(Austrilia) State of Western Australia	Bentazon	25057-89-0	0.4	Australia National standard
(Austrilia) State of Western Australia	Bioresmetrin	28434-01-7	0.1	Australia National standard
(Austrilia) State of Western Australia	Bromacil	314-40-9	0.4	Australia National standard
(Austrilia) State of Western Australia	BROMOPHOS-ETHYL	4824-78-6	0.01	Australia National standard
(Austrilia) State of Western Australia	bromoxynil	1689-84-5	0.01	Australia National standard
(Austrilia) State of Western Australia	Captan	133-06-2	0.4	Australia National standard
(Austrilia) State of Western Australia	Carbaryl	63-25-2	0.03	Australia National standard
(Austrilia) State of Western Australia	Carbendazim	10605-21-7	0.09	Australia National standard
(Austrilia) State of Western Australia	Carfentrazone-ethyl	128639-02-1	0.1	Australia National standard
(Austrilia) State of Western Australia	Carbofuran	1563-66-2	0.01	Australia National standard
(Austrilia) State of Western Australia	Carbophenothion [or Trithion]	786-19-6	0.0005	Australia National standard
(Austrilia) State of Western Australia	Carboxin	5234-68-4	0.3	Australia National standard
(Austrilia) State of Western Australia	Chlorantraniliprole	500008-45-7	6	Australia National standard
(Austrilia) State of Western Australia	Chlordane	12789-03-6	0.002	Australia National standard
(Austrilia) State of Western Australia	Chlorfenvinphos	470-90-6	0.002	Australia National standard
(Austrilia) State of Western Australia	Chlorothalonil	1897-45-6	0.05	Australia National standard
(Austrilia) State of Western Australia	Chloroxuron	1982-47-4	0.01	Australia National standard
(Austrilia) State of Western Australia	Chlorpyrifos	2921-88-2	0.01	Australia National standard
(Austrilia) State of Western Australia	Chlorsulfuron	64902-72-3	0.2	Australia National standard
(Austrilia) State of Western Australia	Clopyralid	1702-17-6	2	Australia National standard
(Austrilia) State of Western Australia	Cyfluthrin	68359-37-5	0.05	Australia National standard
(Austrilia) State of Western Australia	Cypermethrin	52315-07-8	0.2	Australia National standard
(Austrilia) State of Western Australia	Cyprodinil	121552-61-2	0.09	Australia National standard
(Austrilia) State of Western Australia	2,4-D	94-75-7	0.03	Australia National standard
(Austrilia) State of Western Australia	DDT	50-29-3	0.009	Australia National standard
(Austrilia) State of Western Australia	Deltametrin	52918-63-5	0.04	Australia National standard
(Austrilia) State of Western Australia	Diazinon	333-41-5	0.04	Australia National standard
(Austrilia) State of Western Australia	Dicamba	1918-00-9	0.1	Australia National standard
(Austrilia) State of Western Australia	Dichlobenil	1194-65-6	0.01	Australia National standard
(Austrilia) State of Western Australia	1,3-Dichloropropene	542-75-6	0.1	Australia National standard
(Austrilia) State of Western Australia	Dichloroprop / Dichlorprop-P		0.1	Australia National standard
(Austrilia) State of Western Australia	Dichlorprop	120-36-5	0.1	Australia National standard
(Austrilia) State of Western Australia	Dichlorprop-P	15165-67-0	0.1	Australia National standard
(Austrilia) State of Western Australia	Dichlorvos	62-73-7	0.005	Australia National standard
(Austrilia) State of Western Australia	Dichlofop-methyl	51338-27-3	0.005	Australia National standard
(Austrilia) State of Western Australia	Dicofol	115-32-2	0.004	Australia National standard
(Austrilia) State of Western Australia	Difenzoquat (Avenge)	43222-48-6	0.1	Australia National standard
(Austrilia) State of Western Australia	Diflubenzuron	35367-38-5	0.07	Australia National standard
(Austrilia) State of Western Australia	Dimethoate	60-51-5	0.007	Australia National standard
(Austrilia) State of Western Australia	Diphenamid	957-51-7	0.3	Australia National standard
(Austrilia) State of Western Australia	Diquat	85-00-7	0.007	Australia National standard
(Austrilia) State of Western Australia	Disulfoton	298-04-4	0.004	Australia National standard
(Austrilia) State of Western Australia	Diuron	330-54-1	0.02	Australia National standard
(Austrilia) State of Western Australia	2,2-DPA	75-99-0	0.5	Australia National standard
(Austrilia) State of Western Australia	EDB	106-93-4	0.001	Australia National standard
(Austrilia) State of Western Australia	Endosulfan	115-29-7	0.02	Australia National standard
(Austrilia) State of Western Australia	Endothall	145-73-3	0.1	Australia National standard
(Austrilia) State of Western Australia	Epichlorohydrin	106-89-8	0.0005	Australia National standard
(Austrilia) State of Western Australia	EPTC	759-94-4	0.3	Australia National standard
(Austrilia) State of Western Australia	Esfenvalerate	66230-04-4	0.03	Australia National standard
(Austrilia) State of Western Australia	Ethion	563-12-2	0.004	Australia National standard
(Austrilia) State of Western Australia	Ethoprophos	13194-48-4	0.001	Australia National standard
(Austrilia) State of Western Australia	Etridiazole	2593-15-9	0.1	Australia National standard
(Austrilia) State of Western Australia	Fenamiphos	22224-92-6	0.0005	Australia National standard
(Austrilia) State of Western Australia	Fenarimol	60168-88-9	0.04	Australia National standard
(Austrilia) State of Western Australia	Fenitrotion	122-14-5	0.007	Australia National standard
(Austrilia) State of Western Australia	Fenoprop	93-72-1	0.01	Australia National standard
(Austrilia) State of Western Australia	Fensulfothion	115-90-2	0.01	Australia National standard
(Austrilia) State of Western Australia	Fenthion	55-38-9	0.007	Australia National standard
(Austrilia) State of Western Australia	Fenvalerate	51630-58-1	0.06	Australia National standard
(Austrilia) State of Western Australia	Fipronil	120068-37-3	0.0007	Australia National standard
(Austrilia) State of Western Australia	Flamprop-methyl	52756-25-9	0.004	Australia National standard
(Austrilia) State of Western Australia	Fluometuron	2164-17-2	0.07	Australia National standard
(Austrilia) State of Western Australia	Fluproponate	22898-01-7	0.009	Australia National standard
(Austrilia) State of Western Australia	Formothion	2540-82-1	0.05	Australia National standard
(Austrilia) State of Western Australia	Fosamine	59682-52-9	0.03	Australia National standard
(Austrilia) State of Western Australia	Glyphosate	1071-83-6	1	Australia National standard
(Austrilia) State of Western Australia	Haloxyfop	69806-34-4	0.001	Australia National standard
(Austrilia) State of Western Australia	Heptachlor	76-44-8	0.0003	Australia National standard
(Austrilia) State of Western Australia	Hexazinone	51235-04-2	0.4	Australia National standard
(Austrilia) State of Western Australia	Imazapyr	81334-34-1	9	Australia National standard
(Austrilia) State of Western Australia	Iprodione	36734-19-7	0.1	Australia National standard
(Austrilia) State of Western Australia	Lindane	58-89-9	0.01	Australia National standard
(Austrilia) State of Western Australia	Malathion	121-75-5	0.07	Australia National standard
(Austrilia) State of Western Australia	Mancozeb	8018-01-7	0.009	Australia National standard
(Austrilia) State of Western Australia	MCPA	94-74-6	0.04	Australia National standard
(Austrilia) State of Western Australia	Metaldehyde	108-62-3	0.02	Australia National standard
(Austrilia) State of Western Australia	methylisothiocyanate	556-61-6	0.001	Australia National standard
(Austrilia) State of Western Australia	Methidathion	950-37-8	0.006	Australia National standard
(Austrilia) State of Western Australia	Methiocarb	2032-65-7	0.007	Australia National standard
(Austrilia) State of Western Australia	Methomyl	16752-77-5	0.02	Australia National standard
(Austrilia) State of Western Australia	Methoxychlor	72-43-5	0.3	Australia National standard
(Austrilia) State of Western Australia	Methyl bromide	74-83-9	0.001	Australia National standard
(Austrilia) State of Western Australia	Metiram	9006-42-2	0.009	Australia National standard
(Austrilia) State of Western Australia	Metolaclor (Dual)	51218-45-2	0.3	Australia National standard
(Austrilia) State of Western Australia	Metribuzin	21087-64-9	0.07	Australia National standard
(Austrilia) State of Western Australia	Metsulfuron-methyl	74223-64-6	0.04	Australia National standard
(Austrilia) State of Western Australia	Mevinphos	7786-34-7	0.005	Australia National standard
(Austrilia) State of Western Australia	Molinate	2212-67-1	0.004	Australia National standard
(Austrilia) State of Western Australia	MONOCROTOPHOS	6923-22-4	0.002	Australia National standard
(Austrilia) State of Western Australia	Napropamide	15299-99-7	0.4	Australia National standard
(Austrilia) State of Western Australia	Nicarbazin	330-95-0	1	Australia National standard
(Austrilia) State of Western Australia	Nitralin	4726-14-1	0.5	Australia National standard
(Austrilia) State of Western Australia	Norflurazon	27314-13-2	0.05	Australia National standard
(Austrilia) State of Western Australia	Omethoate	1113-02-6	0.001	Australia National standard
(Austrilia) State of Western Australia	Oryzalin	19044-88-3	0.4	Australia National standard
(Austrilia) State of Western Australia	Oxamyl (Vydate)	23135-22-0	0.007	Australia National standard
(Austrilia) State of Western Australia	Paraquat	4685-14-7	0.02	Australia National standard
(Austrilia) State of Western Australia	Parathion	56-38-2	0.02	Australia National standard
(Austrilia) State of Western Australia	Parathion-methyl	298-00-0	0.0007	Australia National standard
(Austrilia) State of Western Australia	Pebulate	1114-71-2	0.03	Australia National standard
(Austrilia) State of Western Australia	Pendimethalin	40487-42-1	0.4	Australia National standard
(Austrilia) State of Western Australia	Pentachlorophenol	87-86-5	0.01	Australia National standard
(Austrilia) State of Western Australia	Permethrin	52645-53-1	0.2	Australia National standard
(Austrilia) State of Western Australia	picloram	1918-02-1	0.3	Australia National standard
(Austrilia) State of Western Australia	Piperonyl butoxide	51-03-6	0.6	Australia National standard
(Austrilia) State of Western Australia	Pirimikarb	23103-98-2	0.007	Australia National standard
(Austrilia) State of Western Australia	Pirimiphos, Methyl	29232-93-7	0.09	Australia National standard
(Austrilia) State of Western Australia	Pirimiphos-ethyl	23505-41-1	0.0005	Australia National standard
(Austrilia) State of Western Australia	Polihexanide	28757-47-3	0.7	Australia National standard
(Austrilia) State of Western Australia	Profenofos	41198-08-7	0.0003	Australia National standard
(Austrilia) State of Western Australia	Propachlor	1918-16-7	0.07	Australia National standard
(Austrilia) State of Western Australia	Propanil	709-98-8	0.7	Australia National standard
(Austrilia) State of Western Australia	Propargite	2312-35-8	0.007	Australia National standard
(Austrilia) State of Western Australia	Propazine	139-40-2	0.05	Australia National standard
(Austrilia) State of Western Australia	Propiconazole	60207-90-1	0.1	Australia National standard
(Austrilia) State of Western Australia	Propyzamide	23950-58-5	0.07	Australia National standard
(Austrilia) State of Western Australia	Pyrasulfotole	365400-11-9	0.04	Australia National standard
[truncated: 2,231 more rows]

## Sheet: U.S. Drinking Water MCLs
U.S. Jurisdiction Name	Pesticides	CAS No.	U.S. Pesticide Drinkng Water MCL (mg/l)
[truncated: 1,933 more rows]
